# Supplementary material for: Reboot: a straightforward approach to identify genes and splicing isoforms associated with cancer patient prognosis
Source: PubMed Central journal article supplement (PMC8210018; doi:10.1093/narcan/zcab024), 2021-06-15
Supplement: zcab024_supplemental_file.pdf [file zcab024_supplemental_file.pdf]

**Figure S1: Random bootstrap resampling analyses for GBM and PAAD.** Datasets of both GBM original and expanded dataset (genes) and PAAD original (transcripts) and expanded dataset (genes) were randomly resampled (patients and attributes) with bootstrap iterations in order to establish an empirical coefficient cutoff aiming to avoid false-positive results. Red dotted line for transcripts and blue dotted line for genes.



**Figure S2: Workflow of inputs to Reboot.** “Module I” requires expression data with values in TPM or FPKM. The first three columns must be the sample identifiers, patients’ status (alive = 0 or dead = 1) and follow-up times (in days). “Module II” requires clinical data for multivariate analyses, where the sample identifiers match the ones present in expression data. Finally, Reboot produces several textual and graphical outputs such as a genetic signature, which is automatically used to generate a risk score evaluated in survival analyses when the “complete” mode is chosen.



**Figure S3: Computational assessment of Reboot.** (A) Evaluation of group size impact on time performance of Reboot. Number of iterations was set to 100 and remaining parameters default. (B) Table showing numerical results for the assay performed in A splitted by module. (C) Run time analysis for instances (patients) variation. Processes were run in the laptop described in section “Usage and performance”. Group size was set to 20, the number of iterations to 100, and remaining parameters default. (D) Number of non-zero coefficients obtained by running Ridge and LASSO algorithms with group size set to 20, number of iterations set to 500, and remaining parameters default.



**Figure S4: Validation of the 3-gene signature score in glioblastoma patients from the CGGA cohort.** (A) Kaplan-Meier curve based on the 3-gene signature score; (B) Forest plot of a multivariate model including the 3-gene signature score along with clinical parameters relevant to prognosis in GBM.



**Figure S5: Reboot's Lollipop plot.** Top 10 transcripts present in generated signature, which are relevant for PAAD survival, where the higher the coefficients (in module), the greater the influence of that transcript to the final patients' outcome.

**A**



**B**

| Variable  |                  | N  | Hazard ratio      | p    |
|-----------|------------------|----|-------------------|------|
| age       | high             | 61 | Reference         |      |
|           | low              | 60 | 0.77 (0.47, 1.27) | 0.31 |
| grade     | high             | 34 | Reference         |      |
|           | low              | 87 | 0.80 (0.47, 1.35) | 0.40 |
| histology | adeno ductal     | 99 | Reference         |      |
|           | not adeno ductal | 22 | 0.32 (0.12, 0.84) | 0.02 |
| score     | high             | 61 | Reference         |      |
|           | low              | 60 | 0.58 (0.35, 0.95) | 0.03 |
| TNM       | high             | 86 | Reference         |      |
|           | low              | 35 | 0.65 (0.35, 1.20) | 0.17 |

**C**



**D**

| Variable  |                  | N  | Hazard ratio      | p    |
|-----------|------------------|----|-------------------|------|
| age       | high             | 24 | Reference         |      |
|           | low              | 27 | 0.72 (0.29, 1.79) | 0.49 |
| grade     | high             | 16 | Reference         |      |
|           | low              | 35 | 0.58 (0.24, 1.37) | 0.21 |
| histology | adeno ductal     | 38 | Reference         |      |
|           | not adeno ductal | 13 | 0.36 (0.07, 1.79) | 0.21 |
| score     | high             | 26 | Reference         |      |
|           | low              | 25 | 0.38 (0.16, 0.92) | 0.03 |
| TNM       | high             | 34 | Reference         |      |
|           | low              | 17 | 0.28 (0.08, 1.04) | 0.06 |

**Figure S6: Reboot’s outputs of PAAD outcomes.** Univariate and multivariate survival analyses for training (A) and (B) and validation (C) and (D) datasets. (A) Kaplan-Meier displaying that patients with higher scores (above median value) have worse prognosis. Follow-up time (days) is shown below curves. (B) Forest plot showing the significance of the score in predicting patients’ outcome with correction for other relevant clinical variables. Similarly, (C) Kaplan-Meier curve evidencing that patients with higher scores (above median value) have worse prognosis. Follow-up time (days) is shown below curves. (B) Forest plot confirming the significance of the score in predicting patients’ outcome with correction for other relevant clinical variables.



**Figure S7: Transcripts of the Huntingtin (HTT) gene.** (1) Chromosome location of HTT, which is part of the final signature that produced a score significant for survival of patients with PAAD. (2) Transcripts 201 and 202 of HTT pinpointing the lack of the DUF3652 domain in the much smaller HTT-202 isoform, which is present in the final signature. (3) Transcripts 201 and 202 of HTT evidencing the position of the DUF3652 domain in the canonical HTT-201 isoform. (4) Predicted structure of HTT-201 isoform with its 14 transmembrane helices (left), highlighting in red the portion representative of HTT-202. The modeled 3D structure of HTT-201 (right) is shown in cartoon representation with rainbow coloring, where  $\alpha$ -helix secondary structures are the helices and  $\beta$ -sheet secondary structures are the arrows heading to the C-terminal. The portion inside the red box is the part of HTT-201 representative of HTT-202.



Number at risk

|   |    |    |    |    |    |   |   |   |   |   |   |
|---|----|----|----|----|----|---|---|---|---|---|---|
| — | 40 | 25 | 17 | 9  | 6  | 3 | 3 | 3 | 3 | 1 | 0 |
| — | 41 | 29 | 19 | 12 | 10 | 7 | 5 | 4 | 2 | 1 | 1 |



Number at risk

|   |    |    |    |    |    |   |   |   |   |   |   |
|---|----|----|----|----|----|---|---|---|---|---|---|
| — | 40 | 24 | 15 | 7  | 5  | 4 | 3 | 3 | 1 | 1 | 1 |
| — | 41 | 30 | 21 | 14 | 11 | 6 | 5 | 4 | 4 | 1 | 0 |



Number at risk

|   |    |    |    |    |   |   |   |   |   |   |   |
|---|----|----|----|----|---|---|---|---|---|---|---|
| — | 86 | 23 | 14 | 6  | 1 | 1 | 1 | 1 | 1 | 0 | 0 |
| — | 87 | 36 | 20 | 11 | 5 | 1 | 1 | 1 | 1 | 0 | 0 |



Number at risk

|   |    |    |    |   |   |   |   |   |   |   |   |
|---|----|----|----|---|---|---|---|---|---|---|---|
| — | 86 | 25 | 13 | 8 | 3 | 1 | 1 | 1 | 1 | 0 | 0 |
| — | 87 | 34 | 21 | 9 | 3 | 1 | 1 | 1 | 1 | 0 | 0 |

**Figure S8: Survival analysis for TN BRCA and ESCA tumors.** Prognosis was obtained through minimal signature, p-value lower than 0.05, by median cut off of patients' score. Genes/transcripts signatures are shown in gray boxes for each case.

**Table S1.** Clinal data from 144 patients with glioblastoma and 9 clinical variables obtained from TCGA.

| sample       | gender | age  | race     | ethnicity              | cancer.status | karnofsky | chemotherapy | IDH.status | MGMT.status  |
|--------------|--------|------|----------|------------------------|---------------|-----------|--------------|------------|--------------|
| TCGA.02.0047 | male   | high | white    | not hispanic or latino | with tumor    | high      | no           | wt         | unmethylated |
| TCGA.02.0055 | female | high | white    | not hispanic or latino | with tumor    | high      | yes          | wt         | unmethylated |
| TCGA.02.2483 | male   | low  | no white | not hispanic or latino | with tumor    | high      | yes          | mut        | methylated   |
| TCGA.02.2485 | male   | low  | no white | not hispanic or latino | with tumor    | high      | yes          | wt         | unmethylated |
| TCGA.02.2486 | male   | high | white    | not hispanic or latino | with tumor    | high      | yes          | wt         | unmethylated |
| TCGA.06.0129 | male   | low  | no white | not hispanic or latino | with tumor    | high      | yes          | mut        | methylated   |
| TCGA.06.0130 | male   | low  | white    | not hispanic or latino | with tumor    | high      | yes          | wt         | unmethylated |
| TCGA.06.0132 | male   | low  | white    | not hispanic or latino | with tumor    | low       | no           | wt         | NA           |
| TCGA.06.0138 | male   | low  | white    | not hispanic or latino | with tumor    | high      | no           | wt         | NA           |
| TCGA.06.0139 | male   | low  | white    | not hispanic or latino | with tumor    | low       | yes          | wt         | unmethylated |
| TCGA.06.0141 | male   | high | white    | not hispanic or latino | with tumor    | high      | yes          | wt         | unmethylated |
| TCGA.06.0152 | male   | high | white    | not hispanic or latino | with tumor    | low       | yes          | NA         | NA           |
| TCGA.06.0157 | female | high | white    | not hispanic or latino | with tumor    | low       | no           | wt         | NA           |
| TCGA.06.0158 | male   | high | white    | not hispanic or latino | with tumor    | high      | yes          | wt         | NA           |
| TCGA.06.0168 | female | high | white    | not hispanic or latino | with tumor    | high      | yes          | wt         | NA           |
| TCGA.06.0171 | male   | high | white    | not hispanic or latino | with tumor    | high      | yes          | NA         | NA           |
| TCGA.06.0174 | male   | low  | white    | not hispanic or latino | with tumor    | high      | yes          | wt         | NA           |
| TCGA.06.0178 | male   | low  | white    | not hispanic or latino | tumor free    | low       | yes          | mut        | NA           |
| TCGA.06.0184 | male   | high | white    | not hispanic or latino | tumor free    | high      | yes          | wt         | NA           |
| TCGA.06.0187 | male   | high | white    | not hispanic or latino | with tumor    | low       | no           | wt         | NA           |
| TCGA.06.0219 | male   | high | white    | not hispanic or latino | with tumor    | low       | no           | wt         | NA           |
| TCGA.06.0221 | male   | low  | white    | not hispanic or latino | with tumor    | high      | yes          | NA         | NA           |
| TCGA.06.0238 | male   | low  | white    | not hispanic or latino | with tumor    | high      | no           | wt         | NA           |
| TCGA.06.0644 | male   | high | no white | not hispanic or latino | with tumor    | high      | yes          | wt         | NA           |
| TCGA.06.0645 | female | low  | white    | not hispanic or latino | with tumor    | low       | no           | wt         | NA           |
| TCGA.06.0646 | male   | high | white    | not hispanic or latino | with tumor    | high      | no           | wt         | NA           |
| TCGA.06.0649 | female | high | no white | not hispanic or latino | with tumor    | low       | no           | wt         | NA           |

|              |        |      |          |                        |            |      |     |     |              |
|--------------|--------|------|----------|------------------------|------------|------|-----|-----|--------------|
| TCGA.06.0686 | male   | low  | white    | not hispanic or latino | with tumor | low  | yes | wt  | NA           |
| TCGA.06.0743 | male   | high | white    | not hispanic or latino | with tumor | high | yes | wt  | NA           |
| TCGA.06.0744 | male   | high | white    | not hispanic or latino | tumor free | high | yes | wt  | NA           |
| TCGA.06.0745 | male   | high | white    | not hispanic or latino | with tumor | high | no  | wt  | NA           |
| TCGA.06.0747 | male   | low  | white    | not hispanic or latino | with tumor | high | no  | wt  | NA           |
| TCGA.06.0749 | male   | low  | no white | not hispanic or latino | with tumor | low  | no  | wt  | NA           |
| TCGA.06.0750 | male   | low  | white    | not hispanic or latino | with tumor | high | no  | wt  | NA           |
| TCGA.06.0878 | male   | high | white    | not hispanic or latino | with tumor | high | yes | wt  | unmethylated |
| TCGA.06.0882 | male   | low  | white    | not hispanic or latino | with tumor | low  | yes | wt  | unmethylated |
| TCGA.06.1804 | female | high | white    | not hispanic or latino | with tumor | low  | no  | wt  | methylated   |
| TCGA.06.2557 | male   | high | no white | not hispanic or latino | with tumor | low  | no  | wt  | unmethylated |
| TCGA.06.2558 | female | high | white    | not hispanic or latino | NA         | low  | no  | wt  | unmethylated |
| TCGA.06.2559 | male   | high | white    | not hispanic or latino | with tumor | low  | yes | wt  | methylated   |
| TCGA.06.2561 | female | low  | white    | not hispanic or latino | with tumor | high | yes | wt  | unmethylated |
| TCGA.06.2562 | male   | high | white    | not hispanic or latino | with tumor | high | yes | wt  | unmethylated |
| TCGA.06.2563 | female | high | white    | not hispanic or latino | with tumor | high | yes | wt  | methylated   |
| TCGA.06.2564 | male   | low  | white    | not hispanic or latino | with tumor | high | yes | wt  | unmethylated |
| TCGA.06.2565 | male   | high | no white | not hispanic or latino | with tumor | high | yes | wt  | methylated   |
| TCGA.06.2567 | male   | high | white    | not hispanic or latino | with tumor | high | yes | wt  | methylated   |
| TCGA.06.2569 | female | low  | no white | not hispanic or latino | with tumor | high | no  | wt  | unmethylated |
| TCGA.06.2570 | female | low  | white    | not hispanic or latino | with tumor | high | yes | mut | methylated   |
| TCGA.06.5408 | female | low  | white    | not hispanic or latino | with tumor | high | yes | wt  | unmethylated |
| TCGA.06.5410 | female | high | white    | not hispanic or latino | with tumor | low  | no  | wt  | methylated   |
| TCGA.06.5411 | male   | low  | white    | not hispanic or latino | with tumor | high | yes | wt  | unmethylated |
| TCGA.06.5412 | female | high | white    | not hispanic or latino | with tumor | high | yes | wt  | methylated   |
| TCGA.06.5413 | male   | high | white    | not hispanic or latino | with tumor | low  | yes | wt  | unmethylated |
| TCGA.06.5414 | male   | high | white    | not hispanic or latino | with tumor | high | yes | wt  | unmethylated |
| TCGA.06.5416 | female | low  | white    | not hispanic or latino | with tumor | high | yes | NA  | unmethylated |
| TCGA.06.5417 | female | low  | white    | not hispanic or latino | with tumor | high | yes | mut | methylated   |
| TCGA.06.5418 | female | high | white    | not hispanic or latino | with tumor | low  | no  | wt  | unmethylated |

|              |        |      |          |                        |            |      |     |    |              |
|--------------|--------|------|----------|------------------------|------------|------|-----|----|--------------|
| TCGA.06.5856 | male   | low  | white    | not hispanic or latino | with tumor | low  | no  | wt | unmethylated |
| TCGA.06.5858 | female | low  | white    | not hispanic or latino | with tumor | high | yes | wt | unmethylated |
| TCGA.06.5859 | male   | high | white    | not hispanic or latino | with tumor | low  | yes | wt | unmethylated |
| TCGA.08.0386 | male   | high | white    | not hispanic or latino | with tumor | high | yes | wt | NA           |
| TCGA.12.0616 | female | low  | white    | not hispanic or latino | with tumor | high | yes | wt | NA           |
| TCGA.12.0618 | male   | low  | white    | not hispanic or latino | NA         | low  | yes | wt | NA           |
| TCGA.12.0619 | male   | high | white    | not hispanic or latino | with tumor | high | yes | wt | NA           |
| TCGA.12.0821 | male   | high | white    | not hispanic or latino | with tumor | low  | yes | wt | unmethylated |
| TCGA.12.1597 | female | high | white    | not hispanic or latino | with tumor | high | yes | wt | unmethylated |
| TCGA.12.3650 | male   | low  | white    | not hispanic or latino | with tumor | high | yes | wt | unmethylated |
| TCGA.12.3652 | male   | high | white    | not hispanic or latino | with tumor | high | yes | wt | unmethylated |
| TCGA.12.3653 | female | low  | white    | not hispanic or latino | with tumor | high | yes | wt | unmethylated |
| TCGA.12.5295 | female | high | white    | not hispanic or latino | with tumor | low  | yes | wt | methylated   |
| TCGA.12.5299 | female | low  | white    | not hispanic or latino | with tumor | high | yes | wt | unmethylated |
| TCGA.14.0736 | male   | low  | no white | NA                     | with tumor | high | yes | NA | NA           |
| TCGA.14.0781 | male   | low  | no white | NA                     | with tumor | low  | no  | wt | unmethylated |
| TCGA.14.0787 | male   | high | no white | not hispanic or latino | NA         | low  | no  | wt | methylated   |
| TCGA.14.0789 | male   | low  | white    | NA                     | NA         | low  | yes | wt | methylated   |
| TCGA.14.0790 | female | high | white    | NA                     | with tumor | low  | yes | wt | methylated   |
| TCGA.14.0817 | female | high | white    | NA                     | NA         | low  | no  | wt | unmethylated |
| TCGA.14.0871 | female | high | white    | NA                     | NA         | low  | no  | wt | unmethylated |
| TCGA.14.1402 | female | low  | white    | NA                     | with tumor | high | yes | NA | NA           |
| TCGA.14.1823 | female | low  | white    | NA                     | with tumor | high | yes | wt | methylated   |
| TCGA.14.1829 | male   | low  | no white | NA                     | with tumor | low  | yes | wt | unmethylated |
| TCGA.14.2554 | female | low  | white    | NA                     | with tumor | low  | no  | wt | unmethylated |
| TCGA.16.0846 | male   | high | white    | not hispanic or latino | with tumor | low  | no  | wt | methylated   |
| TCGA.16.1045 | female | low  | white    | not hispanic or latino | with tumor | low  | no  | wt | methylated   |
| TCGA.19.0957 | female | low  | white    | not hispanic or latino | with tumor | low  | yes | NA | NA           |
| TCGA.19.1389 | male   | low  | white    | not hispanic or latino | with tumor | high | yes | NA | NA           |
| TCGA.19.1390 | female | high | white    | not hispanic or latino | NA         | low  | no  | wt | methylated   |

|              |        |      |          |                        |            |      |     |     |              |
|--------------|--------|------|----------|------------------------|------------|------|-----|-----|--------------|
| TCGA.19.1787 | male   | low  | white    | not hispanic or latino | with tumor | high | yes | NA  | methylated   |
| TCGA.19.2619 | female | low  | no white | not hispanic or latino | with tumor | low  | yes | wt  | methylated   |
| TCGA.19.2620 | male   | high | white    | not hispanic or latino | tumor free | low  | yes | wt  | methylated   |
| TCGA.19.2624 | male   | low  | white    | not hispanic or latino | tumor free | low  | no  | wt  | unmethylated |
| TCGA.19.2625 | female | high | white    | not hispanic or latino | tumor free | low  | no  | wt  | unmethylated |
| TCGA.19.2629 | male   | high | white    | not hispanic or latino | with tumor | low  | yes | mut | unmethylated |
| TCGA.19.5960 | male   | low  | white    | not hispanic or latino | tumor free | high | yes | wt  | unmethylated |
| TCGA.26.1442 | male   | low  | white    | not hispanic or latino | with tumor | high | yes | mut | methylated   |
| TCGA.26.5132 | male   | high | white    | not hispanic or latino | tumor free | low  | yes | wt  | methylated   |
| TCGA.26.5133 | male   | high | white    | not hispanic or latino | tumor free | high | yes | wt  | unmethylated |
| TCGA.26.5134 | male   | high | white    | not hispanic or latino | tumor free | low  | no  | wt  | unmethylated |
| TCGA.26.5136 | female | high | white    | not hispanic or latino | NA         | low  | no  | wt  | methylated   |
| TCGA.26.5139 | female | high | white    | not hispanic or latino | with tumor | low  | no  | wt  | unmethylated |
| TCGA.27.1830 | male   | low  | white    | not hispanic or latino | with tumor | high | yes | wt  | unmethylated |
| TCGA.27.1831 | male   | high | white    | not hispanic or latino | with tumor | high | yes | wt  | unmethylated |
| TCGA.27.1832 | female | high | white    | not hispanic or latino | with tumor | high | yes | wt  | unmethylated |
| TCGA.27.1834 | male   | low  | white    | not hispanic or latino | with tumor | high | yes | wt  | methylated   |
| TCGA.27.1835 | female | low  | white    | not hispanic or latino | with tumor | high | yes | wt  | methylated   |
| TCGA.27.1837 | male   | low  | white    | not hispanic or latino | with tumor | high | yes | wt  | methylated   |
| TCGA.27.2519 | male   | low  | white    | not hispanic or latino | with tumor | high | yes | wt  | unmethylated |
| TCGA.27.2521 | male   | low  | white    | not hispanic or latino | with tumor | high | yes | mut | methylated   |
| TCGA.27.2523 | male   | high | white    | not hispanic or latino | with tumor | high | yes | wt  | methylated   |
| TCGA.27.2524 | male   | low  | white    | not hispanic or latino | with tumor | high | yes | wt  | unmethylated |
| TCGA.27.2526 | female | high | white    | not hispanic or latino | with tumor | low  | no  | wt  | unmethylated |
| TCGA.27.2528 | male   | high | white    | not hispanic or latino | with tumor | high | yes | wt  | methylated   |
| TCGA.28.1747 | male   | low  | white    | not hispanic or latino | NA         | low  | yes | wt  | methylated   |
| TCGA.28.1753 | male   | low  | white    | hispanic or latino     | with tumor | low  | no  | wt  | unmethylated |
| TCGA.28.2509 | female | high | white    | not hispanic or latino | NA         | high | yes | wt  | methylated   |
| TCGA.28.2513 | female | high | white    | not hispanic or latino | with tumor | high | yes | wt  | unmethylated |
| TCGA.28.2514 | male   | low  | no white | not hispanic or latino | NA         | low  | yes | wt  | unmethylated |

|              |        |      |          |                        |            |      |     |    |              |
|--------------|--------|------|----------|------------------------|------------|------|-----|----|--------------|
| TCGA.28.5207 | male   | high | white    | NA                     | with tumor | low  | yes | wt | unmethylated |
| TCGA.28.5208 | male   | low  | white    | NA                     | with tumor | low  | yes | wt | methylated   |
| TCGA.28.5209 | female | high | white    | NA                     | NA         | low  | yes | wt | methylated   |
| TCGA.28.5215 | female | high | white    | NA                     | with tumor | high | yes | wt | methylated   |
| TCGA.28.5216 | male   | low  | white    | NA                     | tumor free | high | yes | wt | unmethylated |
| TCGA.28.5218 | male   | high | white    | NA                     | NA         | low  | yes | wt | unmethylated |
| TCGA.28.5220 | male   | high | white    | NA                     | with tumor | high | yes | wt | unmethylated |
| TCGA.32.1970 | male   | high | white    | NA                     | with tumor | low  | yes | wt | unmethylated |
| TCGA.32.1980 | male   | high | white    | not hispanic or latino | with tumor | low  | no  | wt | unmethylated |
| TCGA.32.1982 | female | high | white    | not hispanic or latino | with tumor | high | yes | wt | methylated   |
| TCGA.32.2615 | male   | high | white    | not hispanic or latino | with tumor | high | yes | wt | unmethylated |
| TCGA.32.2616 | female | low  | white    | hispanic or latino     | with tumor | low  | yes | NA | methylated   |
| TCGA.32.2634 | male   | high | white    | not hispanic or latino | tumor free | low  | yes | wt | methylated   |
| TCGA.32.2638 | male   | high | white    | not hispanic or latino | tumor free | low  | yes | wt | methylated   |
| TCGA.32.4213 | female | low  | white    | not hispanic or latino | with tumor | low  | yes | wt | methylated   |
| TCGA.32.5222 | male   | high | white    | not hispanic or latino | with tumor | low  | yes | wt | methylated   |
| TCGA.41.2571 | male   | high | white    | not hispanic or latino | with tumor | low  | yes | wt | unmethylated |
| TCGA.41.2572 | male   | high | white    | not hispanic or latino | with tumor | low  | yes | wt | unmethylated |
| TCGA.41.3915 | male   | low  | white    | not hispanic or latino | with tumor | low  | yes | wt | methylated   |
| TCGA.41.4097 | female | high | white    | not hispanic or latino | with tumor | low  | no  | wt | unmethylated |
| TCGA.41.5651 | female | high | no white | not hispanic or latino | with tumor | low  | yes | wt | methylated   |
| TCGA.76.4925 | male   | high | white    | not hispanic or latino | NA         | high | yes | wt | methylated   |
| TCGA.76.4926 | male   | high | white    | NA                     | with tumor | high | yes | wt | unmethylated |
| TCGA.76.4927 | male   | low  | white    | NA                     | with tumor | high | no  | wt | unmethylated |
| TCGA.76.4928 | female | high | white    | NA                     | with tumor | high | yes | wt | methylated   |
| TCGA.76.4929 | female | high | white    | not hispanic or latino | with tumor | high | no  | wt | methylated   |
| TCGA.76.4931 | female | high | white    | NA                     | with tumor | high | yes | wt | unmethylated |
| TCGA.76.4932 | female | low  | white    | NA                     | with tumor | high | yes | wt | methylated   |

IDH: Isocitrate dehydrogenase 1; MGMT: O-6-methylguanine-DNA methyltransferase; wt: wild type; mut: mutated.

Table S2. Expression (in FPKM) data from 144 patients with glioblastoma and 50 genes from TCGA.

| sample       | OS      | OS time  | ENSG00000230960 | ENSG00000224747 | ENSG00000104622 | ENSG00000235850 | ENSG00000135363 | ENSG00000188226 | ENSG00000120725 | ENSG00000261208 | ENSG00000223558 | ENSG00000163666 | ENSG00000170885 | ENSG00000258877 | ENSG00000189326 | ENSG00000223996 |
|--------------|---------|----------|-----------------|-----------------|-----------------|-----------------|-----------------|-----------------|-----------------|-----------------|-----------------|-----------------|-----------------|-----------------|-----------------|-----------------|
| TCGA-02.0047 | 1.000   | 448.000  | 0.000           | 0.000           | 9.204           | 0.080           | 8.980           | 0.041           | 9.712           | 0.038           | 0.103           | 0.793           | 0.000           | 0.000           | 0.000           | 0.000           |
| TCGA-02.0055 | 1.000   | 76.000   | 0.016           | 0.000           | 21.978          | 0.113           | 7.614           | 0.023           | 15.523          | 0.000           | 0.029           | 1.180           | 1.916           | 0.000           | 0.000           | 0.000           |
| TCGA-02.2483 | 0.000   | 466.000  | 0.000           | 0.000           | 27.102          | 0.000           | 14.188          | 0.000           | 6.346           | 0.029           | 0.391           | 0.765           | 0.233           | 0.000           | 0.000           | 0.040           |
| TCGA-02.2485 | 0.000   | 470.000  | 0.016           | 0.000           | 16.174          | 0.023           | 24.699          | 0.012           | 4.840           | 0.000           | 0.000           | 1.938           | 0.180           | 0.000           | 0.000           | 0.000           |
| TCGA-02.2486 | 1.000   | 450.000  | 0.000           | 0.000           | 13.186          | 0.000           | 35.223          | 0.018           | 10.558          | 0.000           | 0.000           | 3.253           | 0.379           | 0.000           | 0.000           | 0.000           |
| TCGA-06.0129 | 1.000   | 889.000  | 0.000           | 0.000           | 10.258          | 0.020           | 17.836          | 0.000           | 6.110           | 0.000           | 0.000           | 0.337           | 3.542           | 0.000           | 0.000           | 0.000           |
| TCGA-06.0130 | 1.000   | 320.000  | 0.000           | 0.000           | 20.335          | 0.045           | 18.333          | 0.023           | 10.765          | 0.065           | 0.058           | 3.803           | 2.375           | 0.000           | 0.000           | 0.000           |
| TCGA-06.0132 | 1.000   | 570.000  | 0.000           | 0.000           | 11.003          | 0.024           | 11.000          | 0.000           | 9.903           | 0.011           | 0.000           | 0.659           | 1.830           | 0.000           | 0.000           | 0.000           |
| TCGA-06.0138 | 1.000   | 674.000  | 0.019           | 0.000           | 13.912          | 0.000           | 23.688          | 0.000           | 6.080           | 0.000           | 0.036           | 2.365           | 1.331           | 0.000           | 0.000           | 0.055           |
| TCGA-06.0139 | 1.000   | 327.000  | 0.000           | 0.000           | 14.633          | 0.000           | 17.352          | 0.000           | 11.643          | 0.077           | 0.000           | 1.736           | 0.891           | 0.000           | 0.000           | 0.000           |
| TCGA-06.0141 | 1.000   | 260.000  | 0.014           | 0.000           | 14.773          | 0.000           | 25.310          | 0.021           | 12.189          | 0.047           | 0.000           | 1.633           | 1.947           | 0.000           | 0.000           | 0.000           |
| TCGA-06.0152 | 1.000   | 359.000  | 0.014           | 0.000           | 10.824          | 0.020           | 62.678          | 0.032           | 12.759          | 0.038           | 0.026           | 0.975           | 1.524           | 0.000           | 0.000           | 0.000           |
| TCGA-06.0157 | 1.000   | 97.000   | 0.000           | 0.065           | 11.754          | 0.000           | 31.265          | 0.000           | 7.729           | 0.010           | 0.000           | 0.990           | 1.413           | 0.012           | 0.000           | 0.000           |
| TCGA-06.0158 | 1.000   | 166.000  | 0.000           | 0.000           | 10.132          | 0.020           | 25.689          | 0.020           | 8.395           | 0.000           | 0.051           | 1.484           | 1.371           | 0.000           | 0.000           | 0.000           |
| TCGA-06.0168 | 1.000   | 579.000  | 0.000           | 0.000           | 16.945          | 0.000           | 27.075          | 0.045           | 13.957          | 0.042           | 0.000           | 1.113           | 2.229           | 0.000           | 0.000           | 0.000           |
| TCGA-06.0171 | 1.000   | 396.000  | 0.028           | 0.061           | 6.858           | 0.000           | 29.110          | 0.010           | 13.310          | 0.009           | 0.077           | 1.074           | 1.346           | 0.000           | 0.000           | 0.000           |
| TCGA-06.0174 | 1.000   | 67.000   | 0.054           | 0.070           | 10.016          | 0.000           | 14.946          | 0.023           | 7.823           | 0.011           | 0.000           | 0.695           | 0.850           | 0.000           | 0.000           | 0.000           |
| TCGA-06.0178 | 1.000   | 1642.000 | 0.019           | 0.000           | 11.622          | 0.000           | 9.013           | 0.010           | 7.105           | 0.000           | 0.000           | 0.866           | 0.163           | 0.000           | 0.000           | 0.000           |
| TCGA-06.0184 | 1.000   | 1228.000 | 0.014           | 0.000           | 24.213          | 0.041           | 35.817          | 0.000           | 14.828          | 0.010           | 0.106           | 1.211           | 0.352           | 0.000           | 0.000           | 0.000           |
| TCGA-06.0187 | 1.000   | 801.000  | 0.000           | 0.000           | 10.510          | 0.000           | 49.377          | 0.023           | 8.476           | 0.000           | 0.000           | 0.606           | 1.182           | 0.000           | 0.000           | 0.044           |
| TCGA-06.0219 | 1.000   | 11.000   | 0.016           | 0.000           | 13.214          | 0.000           | 21.605          | 0.012           | 7.238           | 0.011           | 0.000           | 2.777           | 0.272           | 0.000           | 0.000           | 0.000           |
| TCGA-06.0221 | 1.000   | 96.000   | 0.000           | 0.000           | 5.387           | 0.024           | 7.681           | 0.037           | 4.982           | 0.000           | 0.000           | 0.560           | 0.969           | 0.000           | 0.000           | 0.000           |
| TCGA-06.0238 | 1.000   | 359.000  | 0.050           | 0.073           | 7.982           | 0.071           | 13.949          | 0.012           | 8.545           | 0.000           | 0.031           | 1.235           | 2.652           | 0.000           | 0.000           | 0.000           |
| TCGA-06.0644 | 1.000   | 375.000  | 0.000           | 0.000           | 16.691          | 0.262           | 7.753           | 0.031           | 17.673          | 0.010           | 0.026           | 0.585           | 1.099           | 0.000           | 0.000           | 0.000           |
| TCGA-06.0645 | 1.000   | 98.000   | 0.000           | 0.000           | 12.595          | 0.022           | 34.021          | 0.012           | 11.933          | 0.000           | 0.029           | 0.685           | 1.322           | 0.000           | 0.000           | 0.000           |
| TCGA-06.0646 | 1.000   | 136.000  | 0.016           | 0.000           | 13.731          | 0.023           | 19.735          | 0.000           | 7.681           | 0.000           | 0.030           | 0.834           | 2.561           | 0.000           | 0.000           | 0.000           |
| TCGA-06.0649 | 1.000   | 62.000   | 0.018           | 0.000           | 11.810          | 0.053           | 12.114          | 0.014           | 14.641          | 0.000           | 0.100           | 2.200           | 2.210           | 0.019           | 0.000           | 0.053           |
| TCGA-06.0696 | 1.000   | 286.000  | 0.097           | 0.000           | 9.490           | 0.027           | 18.734          | 0.000           | 19.744          | 0.042           | 0.000           | 0.692           | 2.328           | 0.000           | 0.000           | 0.000           |
| TCGA-06.0743 | 1.000   | 679.000  | 0.000           | 0.000           | 10.763          | 0.023           | 43.945          | 0.000           | 8.449           | 0.022           | 0.000           | 1.861           | 0.722           | 0.000           | 0.000           | 0.000           |
| TCGA-06.0744 | 1.000   | 595.000  | 0.000           | 0.000           | 15.762          | 0.047           | 54.637          | 0.012           | 3.531           | 0.000           | 0.000           | 1.785           | 0.184           | 0.000           | 0.000           | 0.000           |
| TCGA-06.0745 | 1.000   | 164.000  | 0.013           | 0.000           | 16.767          | 0.000           | 37.151          | 0.010           | 15.607          | 0.000           | 0.000           | 0.698           | 1.472           | 0.000           | 0.000           | 0.000           |
| TCGA-06.0747 | 1.000   | 82.000   | 0.000           | 0.000           | 8.451           | 0.020           | 12.292          | 0.010           | 20.115          | 0.000           | 0.026           | 1.748           | 1.977           | 0.000           | 0.000           | 0.000           |
| TCGA-06.0749 | 1.000   | 96.000   | 0.016           | 0.000           | 13.557          | 0.023           | 20.910          | 0.000           | 15.296          | 0.000           | 0.181           | 1.130           | 1.782           | 0.000           | 0.000           | 0.000           |
| TCGA-06.0750 | 1.000   | 28.000   | 0.000           | 0.000           | 13.309          | 0.000           | 28.105          | 0.000           | 16.375          | 0.011           | 0.378           | 1.775           | 1.684           | 0.000           | 0.000           | 0.000           |
| TCGA-06.0878 | 1.000   | 218.000  | 0.000           | 0.000           | 9.873           | 0.000           | 24.197          | 0.024           | 12.636          | 0.000           | 0.000           | 0.884           | 2.105           | 0.000           | 0.000           | 0.000           |
| TCGA-06.0882 | 1.000   | 165.000  | 0.000           | 0.000           | 10.893          | 0.022           | 108.259         | 0.000           | 10.575          | 0.000           | 0.056           | 1.554           | 1.452           | 0.000           | 0.000           | 0.043           |
| TCGA-06.1804 | 1.000   | 414.000  | 0.014           | 0.000           | 8.516           | 0.103           | 12.514          | 0.021           | 8.823           | 0.000           | 0.186           | 1.944           | 1.897           | 0.000           | 0.000           | 0.041           |
| TCGA-06.2557 | 1.000   | 33.000   | 0.000           | 0.000           | 11.154          | 0.000           | 36.333          | 0.032           | 9.730           | 0.020           | 0.027           | 2.400           | 1.557           | 0.000           | 0.000           | 0.000           |
| TCGA-06.2558 | 1.000   | 23.000   | 0.000           | 0.000           | 12.452          | 0.000           | 21.804          | 0.013           | 7.498           | 0.012           | 0.127           | 0.766           | 2.631           | 0.014           | 0.000           | 0.000           |
| TCGA-06.2559 | 1.000   | 150.000  | 0.018           | 0.000           | 8.594           | 0.000           | 27.548          | 0.000           | 7.620           | 0.000           | 0.000           | 0.735           | 2.004           | 0.015           | 0.000           | 0.000           |
| TCGA-06.2561 | 1.000   | 282.000  | 0.070           | 0.000           | 9.242           | 0.025           | 59.071          | 0.052           | 12.259          | 0.000           | 0.000           | 1.706           | 1.876           | 0.000           | 0.000           | 0.000           |
| TCGA-06.2562 | 1.000   | 86.000   | 0.000           | 0.000           | 12.789          | 0.085           | 60.316          | 0.000           | 11.007          | 0.000           | 0.000           | 0.523           | 0.388           | 0.000           | 0.000           | 0.000           |
| TCGA-06.2563 | 1.000   | 932.000  | 0.000           | 0.000           | 16.818          | 0.000           | 40.293          | 0.012           | 7.767           | 0.000           | 0.000           | 0.976           | 0.798           | 0.000           | 0.000           | 0.047           |
| TCGA-06.2564 | 1.000   | 161.000  | 0.014           | 0.000           | 9.811           | 0.040           | 37.135          | 0.010           | 9.710           | 0.010           | 0.000           | 0.698           | 1.528           | 0.000           | 0.000           | 0.000           |
| TCGA-06.2565 | 1.000   | 207.000  | 0.014           | 0.000           | 12.850          | 0.257           | 84.705          | 0.011           | 8.156           | 0.000           | 0.055           | 1.339           | 0.658           | 0.012           | 0.000           | 0.000           |
| TCGA-06.2567 | 1.000   | 133.000  | 0.000           | 0.000           | 11.547          | 0.063           | 11.804          | 0.000           | 8.743           | 0.000           | 0.054           | 2.286           | 3.954           | 0.000           | 0.000           | 0.000           |
| TCGA-06.2569 | 0.000   | 13.000   | 0.000           | 0.000           | 47.198          | 0.000           | 8.819           | 0.036           | 9.351           | 0.055           | 0.388           | 0.753           | 0.313           | 0.000           | 0.000           | 0.000           |
| TCGA-06.2570 | 1.000   | 958.000  | 0.016           | 0.000           | 13.609          | 0.047           | 16.724          | 0.000           | 7.155           | 0.000           | 0.241           | 0.953           | 2.809           | 0.000           | 0.000           | 0.000           |
| TCGA-06.5408 | 1.000   | 342.000  | 0.014           | 0.000           | 12.293          | 0.000           | 27.538          | 0.010           | 8.899           | 0.000           | 0.052           | 1.518           | 2.172           | 0.012           | 0.000           | 0.000           |
| TCGA-06.5410 | 1.000   | 108.000  | 0.013           | 0.000           | 9.469           | 0.057           | 46.983          | 0.020           | 18.380          | 0.000           | 0.000           | 0.766           | 0.923           | 0.000           | 0.000           | 0.000           |
| TCGA-06.5411 | 1.000   | 254.000  | 0.094           | 0.000           | 14.196          | 0.058           | 22.828          | 0.010           | 7.513           | 0.000           | 0.124           | 0.828           | 2.287           | 0.000           | 0.000           | 0.000           |
| TCGA-06.5412 | 1.000   | 138.000  | 0.000           | 0.000           | 15.623          | 0.021           | 73.173          | 0.042           | 17.942          | 0.010           | 0.053           | 0.875           | 0.955           | 0.000           | 0.000           | 0.041           |
| TCGA-06.5413 | 1.000   | 268.000  | 0.000           | 0.000           | 15.542          | 0.000           | 23.870          | 0.011           | 11.528          | 0.010           | 0.000           | 0.812           | 3.040           | 0.000           | 0.000           | 0.000           |
| TCGA-06.5414 | 1.000   | 273.000  | 0.000           | 0.000           | 12.504          | 0.000           | 57.083          | 0.038           | 9.762           | 0.009           | 0.000           | 0.898           | 1.174           | 0.000           | 0.000           | 0.037           |
| TCGA-06.5416 | 1.000   | 161.000  | 0.024           | 0.000           | 19.321          | 0.000           | 11.933          | 0.000           | 26.523          | 0.016           | 0.000           | 0.886           | 2.941           | 0.000           | 0.000           | 0.000           |
| TCGA-06.5417 | 1.000   | 155.000  | 0.062           | 0.000           | 8.057           | 0.000           | 9.094           | 0.137           | 5.998           | 0.042           | 0.115           | 4.173           | 0.343           | 0.000           | 0.000           | 0.000           |
| TCGA-06.5418 | 1.000   | 83.000   | 0.000           | 0.000           | 14.108          | 0.000           | 30.560          | 0.000           | 12.033          | 0.000           | 0.029           | 1.202           | 1.756           | 0.013           | 0.000           | 0.000           |
| TCGA-06.5856 | 1.000   | 114.000  | 0.000           | 0.000           | 10.683          | 0.000           | 28.607          | 0.032           | 9.724           | 0.000           | 0.000           | 2.520           | 1.768           | 0.000           | 0.000           | 0.000           |
| TCGA-06.5858 | 1.000   | 187.000  | 0.000           | 0.000           | 10.683          | 0.021           | 18.987          | 0.011           | 9.426           | 0.020           | 0.000           | 1.206           | 3.154           | 0.000           | 0.000           | 0.000           |
| TCGA-06.5859 | 1.000   | 139.000  | 0.000           | 0.000           | 7.905           | 0.000           | 25.852          | 0.000           | 22.107          | 0.000           | 0.000           | 1.788           | 5.933           | 0.000           | 0.000           | 0.000           |
| TCGA-06.0398 | 1.000   | 423.000  | 0.014           | 0.000           | 12.604          | 0.000           | 12.604          | 0.000           | 7.612           | 0.011           | 0.000           | 1.883           | 7.029           | 0.000           | 0.000           | 0.000           |
| TCGA-12.0616 | 1.000   | 439.000  | 0.025           | 0.109           | 18.050          | 0.036           | 14.182          | 0.000           | 9.125           | 0.017           | 0.000           | 2.459           | 1.931           | 0.021           | 0.000           | 0.000           |
| TCGA-12.0618 | 1.000   | 50.000   | 0.039           | 0.000           | 11.864          | 0.037           | 7.941           | 0.000           | 8.092           | 0.009           | 0.024           | 0.441           | 0.186           | 0.000           | 0.000           | 0.000           |
| TCGA-12.0619 | 1.000   | 316.000  | 0.000           | 0.000           | 10.509          | 0.199           | 14.518          | 0.020           | 14.809          | 0.000           | 0.000           | 1.078           | 3.042           | 0.023           | 0.000           | 0.000           |
| TCGA-12.0821 | 1.000   | 323.000  | 0.015           | 0.068           | 7.888           | 0.000           | 9.069           | 0.023           | 9.558           | 0.011           | 0.286           | 0.592           | 3.546           | 0.000           | 0.000           | 0.000           |
| TCGA-12.1567 | 1.000</ |          |                 |                 |                 |                 |                 |                 |                 |                 |                 |                 |                 |                 |                 |                 |



| ENSG0000016400 | ENSG0000011282 | ENSG0000019242 | ENSG00000154198 | ENSG00000070759 | ENSG00000234186 | ENSG00000261648 | ENSG00000268529 | ENSG00000263485 | ENSG00000237725 | ENSG00000203782 | ENSG00000260488 | ENSG00000392828 | ENSG00000254707 |       |
|----------------|----------------|----------------|-----------------|-----------------|-----------------|-----------------|-----------------|-----------------|-----------------|-----------------|-----------------|-----------------|-----------------|-------|
| 25.553         | 3.306          | 6.609          | 0.000           | 1.281           | 0.000           | 0.227           | 0.000           | 0.000           | 0.020           | 0.000           | 0.000           | 9.136           | 0.000           |       |
| 16.307         | 3.418          | 4.079          | 0.013           | 1.641           | 0.171           | 0.071           | 0.000           | 0.000           | 0.000           | 0.017           | 0.000           | 6.946           | 0.000           |       |
| 5.878          | 3.017          | 5.833          | 0.000           | 0.970           | 0.000           | 0.592           | 0.000           | 0.000           | 0.000           | 0.015           | 0.000           | 8.874           | 0.000           |       |
| 65.701         | 3.696          | 7.524          | 0.000           | 0.894           | 0.009           | 0.448           | 0.000           | 0.006           | 0.000           | 0.000           | 0.000           | 8.297           | 0.000           |       |
| 37.115         | 3.497          | 8.326          | 0.000           | 2.224           | 0.000           | 0.000           | 0.000           | 0.000           | 0.000           | 0.000           | 0.000           | 6.796           | 0.000           |       |
| 6.331          | 8.450          | 3.552          | 0.000           | 2.381           | 0.000           | 0.711           | 0.000           | 0.000           | 0.000           | 0.045           | 0.000           | 10.331          | 12.289          |       |
| 6.600          | 3.632          | 7.215          | 0.013           | 1.460           | 0.000           | 0.328           | 0.000           | 0.000           | 0.000           | 0.034           | 0.000           | 9.723           | 0.000           |       |
| 38.585         | 2.335          | 14.118         | 0.014           | 2.080           | 0.009           | 0.338           | 0.000           | 0.000           | 0.000           | 0.054           | 0.000           | 5.050           | 0.000           |       |
| 33.474         | 2.688          | 5.900          | 0.000           | 1.901           | 0.000           | 0.139           | 0.000           | 0.000           | 0.000           | 0.021           | 0.000           | 5.013           | 0.000           |       |
| 8.796          | 3.307          | 4.316          | 0.000           | 2.204           | 0.000           | 0.168           | 0.000           | 0.000           | 0.000           | 0.000           | 0.000           | 3.907           | 0.000           |       |
| 38.439         | 2.695          | 5.945          | 0.000           | 1.719           | 0.022           | 0.141           | 0.000           | 0.000           | 0.000           | 0.039           | 0.000           | 6.052           | 0.000           |       |
| 19.962         | 4.164          | 8.759          | 0.000           | 0.961           | 0.000           | 0.801           | 0.000           | 0.000           | 0.000           | 0.067           | 0.015           | 10.299          | 0.000           |       |
| 44.737         | 3.654          | 5.812          | 0.000           | 1.429           | 0.008           | 0.216           | 0.000           | 0.000           | 0.000           | 0.000           | 0.037           | 9.245           | 0.000           |       |
| 45.018         | 4.963          | 8.871          | 0.000           | 2.203           | 0.000           | 0.319           | 0.000           | 0.000           | 0.000           | 0.064           | 0.015           | 9.811           | 0.000           |       |
| 71.081         | 2.745          | 9.223          | 0.000           | 2.066           | 0.000           | 0.351           | 0.000           | 0.000           | 0.000           | 0.086           | 0.000           | 1.136           | 8.071           |       |
| 30.014         | 3.814          | 5.809          | 0.000           | 2.387           | 0.000           | 0.134           | 0.000           | 0.005           | 0.000           | 0.000           | 0.029           | 8.431           | 0.000           |       |
| 12.881         | 3.359          | 5.822          | 0.000           | 0.845           | 0.000           | 0.325           | 0.000           | 0.000           | 0.000           | 0.034           | 0.000           | 6.062           | 9.198           |       |
| 7.329          | 1.760          | 4.486          | 0.000           | 1.732           | 0.000           | 0.075           | 0.000           | 0.000           | 0.000           | 0.102           | 0.000           | 2.650           | 0.000           |       |
| 39.848         | 2.353          | 5.240          | 0.000           | 1.934           | 0.000           | 0.046           | 0.000           | 0.000           | 0.000           | 0.000           | 0.064           | 7.840           | 0.000           |       |
| 51.659         | 1.790          | 6.439          | 0.000           | 1.385           | 0.000           | 0.130           | 0.000           | 0.000           | 0.000           | 0.000           | 0.000           | 7.896           | 0.000           |       |
| 20.920         | 2.223          | 5.561          | 0.000           | 2.919           | 0.000           | 0.155           | 0.000           | 0.000           | 0.000           | 0.071           | 0.000           | 3.584           | 0.000           |       |
| 28.916         | 5.757          | 11.132         | 0.000           | 2.245           | 0.000           | 2.839           | 0.000           | 0.000           | 0.075           | 0.000           | 0.018           | 12.307          | 0.000           |       |
| 17.737         | 2.590          | 6.524          | 0.000           | 1.816           | 0.000           | 0.375           | 0.000           | 0.000           | 0.000           | 0.077           | 0.018           | 5.988           | 0.000           |       |
| 14.458         | 2.201          | 5.710          | 0.000           | 0.953           | 0.023           | 0.165           | 0.000           | 0.000           | 0.000           | 0.000           | 0.000           | 7.334           | 0.000           |       |
| 23.129         | 2.917          | 6.851          | 0.000           | 1.895           | 0.000           | 0.199           | 0.000           | 0.000           | 0.000           | 0.000           | 0.039           | 6.029           | 0.000           |       |
| 14.580         | 3.589          | 6.322          | 0.000           | 1.286           | 0.000           | 0.657           | 0.000           | 0.000           | 0.000           | 0.106           | 0.041           | 8.203           | 0.000           |       |
| 30.952         | 3.497          | 5.916          | 0.000           | 2.916           | 0.000           | 0.271           | 0.000           | 0.007           | 0.000           | 0.089           | 0.000           | 7.981           | 0.000           |       |
| 20.832         | 2.697          | 10.123         | 0.000           | 1.729           | 0.000           | 0.404           | 0.000           | 0.000           | 0.000           | 0.000           | 0.000           | 6.583           | 0.000           |       |
| 78.867         | 3.194          | 9.539          | 0.000           | 1.858           | 0.000           | 0.137           | 0.000           | 0.000           | 0.000           | 0.000           | 0.035           | 7.085           | 0.000           |       |
| 22.124         | 3.417          | 6.972          | 0.014           | 1.250           | 0.000           | 0.202           | 0.000           | 0.000           | 0.000           | 0.053           | 0.000           | 6.771           | 0.000           |       |
| 18.761         | 2.693          | 7.318          | 0.000           | 0.884           | 0.000           | 0.170           | 0.000           | 0.000           | 0.000           | 0.062           | 0.072           | 6.822           | 0.000           |       |
| 20.098         | 4.150          | 7.247          | 0.000           | 1.728           | 0.000           | 0.199           | 0.000           | 0.000           | 0.000           | 0.061           | 0.000           | 9.150           | 0.000           |       |
| 78.043         | 3.359          | 11.340         | 0.000           | 2.723           | 0.000           | 0.154           | 0.000           | 0.000           | 0.000           | 0.184           | 0.000           | 8.168           | 0.000           |       |
| 27.901         | 1.486          | 8.437          | 0.000           | 1.516           | 0.000           | 0.238           | 0.039           | 0.000           | 0.000           | 0.073           | 0.000           | 6.237           | 0.000           |       |
| 15.439         | 4.223          | 6.180          | 0.000           | 1.608           | 0.000           | 0.083           | 0.000           | 0.000           | 0.000           | 0.000           | 0.000           | 10.318          | 0.000           |       |
| 90.287         | 3.319          | 9.049          | 0.000           | 2.143           | 0.000           | 0.277           | 0.000           | 0.000           | 0.000           | 0.000           | 0.000           | 8.308           | 0.000           |       |
| 72.164         | 4.432          | 10.243         | 0.000           | 3.179           | 0.070           | 0.900           | 0.000           | 0.000           | 0.000           | 0.000           | 0.000           | 0.984           | 11.879          |       |
| 49.120         | 3.116          | 6.704          | 0.000           | 2.268           | 0.016           | 0.235           | 0.000           | 0.000           | 0.000           | 0.000           | 0.000           | 6.883           | 0.000           |       |
| 28.973         | 4.463          | 4.436          | 0.000           | 1.603           | 0.000           | 0.438           | 0.000           | 0.000           | 0.000           | 0.000           | 0.000           | 9.359           | 0.000           |       |
| 14.224         | 5.586          | 6.922          | 0.000           | 1.649           | 0.000           | 0.298           | 0.000           | 0.007           | 0.000           | 0.000           | 0.057           | 11.732          | 0.000           |       |
| 20.216         | 3.244          | 11.951         | 0.015           | 1.613           | 0.000           | 0.363           | 0.000           | 0.000           | 0.000           | 0.114           | 0.044           | 9.942           | 0.000           |       |
| 25.435         | 4.121          | 6.884          | 0.000           | 1.036           | 0.016           | 0.251           | 0.000           | 0.012           | 0.000           | 0.069           | 0.016           | 0.033           | 8.626           | 0.000 |
| 20.390         | 5.298          | 8.196          | 0.014           | 1.146           | 0.000           | 0.085           | 0.000           | 0.000           | 0.000           | 0.000           | 0.000           | 9.214           | 0.040           |       |
| 24.310         | 6.472          | 6.461          | 0.000           | 1.476           | 0.000           | 0.272           | 0.000           | 0.000           | 0.000           | 0.272           | 0.000           | 12.445          | 0.000           |       |
| 16.746         | 6.279          | 6.400          | 0.012           | 1.234           | 0.000           | 0.182           | 0.000           | 0.006           | 0.000           | 0.000           | 0.000           | 11.516          | 0.000           |       |
| 69.855         | 4.071          | 4.815          | 0.000           | 3.616           | 0.000           | 0.334           | 0.000           | 0.000           | 0.000           | 0.000           | 0.000           | 12.055          | 0.000           |       |
| 14.436         | 11.190         | 3.142          | 0.000           | 1.801           | 0.000           | 0.048           | 0.000           | 0.000           | 0.000           | 0.017           | 0.121           | 11.722          | 0.079           |       |
| 9.115          | 5.048          | 7.646          | 0.000           | 2.637           | 0.000           | 0.291           | 0.000           | 0.000           | 0.000           | 0.076           | 0.106           | 9.086           | 0.040           |       |
| 12.621         | 2.652          | 7.116          | 0.000           | 1.265           | 0.000           | 0.238           | 0.000           | 0.000           | 0.000           | 0.015           | 0.000           | 12.270          | 0.000           |       |
| 13.946         | 2.697          | 7.151          | 0.000           | 2.863           | 0.000           | 0.283           | 0.000           | 0.000           | 0.000           | 0.103           | 0.033           | 6.872           | 0.000           |       |
| 33.589         | 3.104          | 12.571         | 0.022           | 2.509           | 0.007           | 0.649           | 0.000           | 0.000           | 0.000           | 0.159           | 0.000           | 6.046           | 0.000           |       |
| 14.571         | 2.762          | 7.010          | 0.000           | 0.945           | 0.000           | 0.090           | 0.000           | 0.000           | 0.000           | 0.067           | 0.000           | 7.865           | 0.000           |       |
| 18.858         | 2.394          | 6.670          | 0.000           | 1.649           | 0.000           | 0.339           | 0.000           | 0.000           | 0.000           | 0.000           | 0.000           | 10.541          | 0.000           |       |
| 19.890         | 3.799          | 6.765          | 0.000           | 1.204           | 0.000           | 0.116           | 0.000           | 0.005           | 0.000           | 0.028           | 0.000           | 10.097          | 0.000           |       |
| 15.532         | 4.423          | 6.026          | 0.000           | 1.423           | 0.000           | 0.272           | 0.000           | 0.000           | 0.000           | 0.000           | 0.000           | 7.498           | 0.000           |       |
| 7.680          | 6.725          | 4.906          | 0.000           | 1.194           | 0.000           | 0.093           | 0.000           | 0.000           | 0.000           | 0.000           | 0.000           | 18.820          | 0.000           |       |
| 26.794         | 4.194          | 5.295          | 0.000           | 1.218           | 0.000           | 0.257           | 0.000           | 0.000           | 0.000           | 0.000           | 0.000           | 8.809           | 0.000           |       |
| 17.832         | 3.162          | 6.620          | 0.000           | 1.578           | 0.016           | 0.385           | 0.000           | 0.000           | 0.000           | 0.000           | 0.000           | 13.798          | 0.000           |       |
| 42.963         | 4.737          | 5.914          | 0.000           | 1.992           | 0.000           | 0.119           | 0.000           | 0.000           | 0.000           | 0.000           | 0.000           | 14.276          | 0.000           |       |
| 52.193         | 2.620          | 6.262          | 0.000           | 2.270           | 0.000           | 0.326           | 0.000           | 0.000           | 0.000           | 0.000           | 0.000           | 12.087          | 0.000           |       |
| 69.080         | 6.515          | 7.463          | 0.000           | 1.603           | 0.000           | 0.288           | 0.000           | 0.000           | 0.000           | 0.591           | 0.000           | 9.469           | 0.000           |       |
| 19.488         | 2.578          | 5.571          | 0.000           | 0.745           | 0.000           | 0.475           | 0.000           | 0.000           | 0.000           | 0.000           | 0.000           | 7.418           | 0.000           |       |
| 19.243         | 4.453          | 6.509          | 0.000           | 0.853           | 0.000           | 0.832           | 0.000           | 0.000           | 0.000           | 0.060           | 0.028           | 9.705           | 0.032           |       |
| 28.469         | 5.635          | 5.715          | 0.000           | 1.980           | 0.000           | 0.407           | 0.000           | 0.000           | 0.000           | 0.015           | 0.000           | 9.016           | 0.034           |       |
| 36.747         | 4.330          | 4.595          | 0.000           | 1.062           | 0.000           | 0.088           | 0.000           | 0.000           | 0.000           | 0.000           | 0.033           | 11.236          | 0.000           |       |
| 56.558         | 3.497          | 6.266          | 0.000           | 3.542           | 0.000           | 0.272           | 0.000           | 0.000           | 0.000           | 0.000           | 0.000           | 6.581           | 0.000           |       |
| 15.173         | 2.753          | 5.945          | 0.000           | 1.384           | 0.000           | 0.189           | 0.000           | 0.000           | 0.000           | 0.000           | 0.000           | 10.587          | 0.000           |       |
| 24.887         | 2.298          | 3.999          | 0.000           | 0.857           | 0.000           | 0.041           | 0.000           | 0.000           | 0.000           | 0.000           | 0.000           | 5.348           | 0.000           |       |
| 45.099         | 2.999          | 6.277          | 0.000           | 1.236           | 0.013           | 0.054           | 0.000           | 0.000           | 0.000           | 0.000           | 0.000           | 10.105          | 0.000           |       |
| 16.400         | 2.307          | 6.843          | 0.000           | 0.854           | 0.000           | 0.062           | 0.000           | 0.008           | 0.000           | 0.000           | 0.000           | 5.718           | 0.000           |       |
| 31.744         | 1.736          | 6.283          | 0.000           | 0.884           | 0.000           | 0.435           | 0.000           | 0.000           | 0.000           | 0.015           | 0.000           | 8.360           | 0.000           |       |
| 51.021         | 1.801          | 7.177          | 0.000           | 2.968           | 0.000           | 0.168           | 0.000           | 0.000           | 0.000           | 0.168           | 0.000           | 6.062           | 0.000           |       |
| 31.831         | 2.602          | 6.916          | 0.000           | 0.856           | 0.000           | 0.098           | 0.000           | 0.000           | 0.000           | 0.014           | 0.000           | 7.350           | 0.000           |       |
| 37.185         | 2.164          | 10.076         | 0.000           | 1.586           | 0.000           | 0.193           | 0.000           | 0.000           | 0.000           | 0.027           | 0.000           | 9.819           | 0.000           |       |
| 12.890         | 3.301          | 6.755          | 0.000           | 1.646           | 0.000           | 0.124           | 0.000           | 0.000           | 0.000           | 0.000           | 0.000           | 8.882           | 0.000           |       |
| 69.730         | 4.300          | 6.365          | 0.000           | 1.504           | 0.000           | 0.092           | 0.000           | 0.000           | 0.000           | 0.000           | 0.000           | 9.390           | 0.000           |       |
| 28.874         | 3.676          | 6.076          | 0.000           | 1.179           | 0.000           | 0.265           | 0.000           | 0.000           | 0.000           | 0.000           | 0.000           | 12.918          | 0.000           |       |
| 12.232         | 7.106          | 3.265          | 0.000           | 2.204           | 0.000           | 0.096           | 0.000           | 0.000           | 0.000           | 0.000           | 0.000           | 12.879          | 0.000           |       |
| 46.368         | 4.616          | 3.620          | 0.000           | 1.259           | 0.000           | 0.056           | 0.000           | 0.000           | 0.000           | 0.044           | 0.000           | 4.993           | 0.000           |       |
| 33.412         | 3.405          | 4.483          | 0.000           | 1.233           | 0.000           | 0.081           | 0.000           | 0.000           | 0.000           | 0.000           | 0.000           | 5.155           | 0.000           |       |
| 13.592         | 2.690          | 2.911          | 0.000           | 2.102           | 0.000           | 0.005           | 0.000           | 0.000           | 0.000           | 0.000           | 0.000           | 3.815           | 0.000           |       |
| 43.981         | 2.991          | 8.117          | 0.000           | 1.555           | 0.000           | 0.051           | 0.000           | 0.000           | 0.000           | 0.000           | 0.073           | 7.704           | 0.000           |       |
| 21.176         | 4.436          | 6.463          | 0.000           | 2.212           | 0.000           |                 |                 |                 |                 |                 |                 |                 |                 |       |

| ENSG00000220924 | ENSG00000117682 | ENSG00000137218 | ENSG00000211958 |
|-----------------|-----------------|-----------------|-----------------|
| 0.055           | 6.939           | 2.442           | 0.000           |
| 0.234           | 7.949           | 2.459           | 0.049           |
| 0.083           | 6.754           | 4.103           | 0.000           |
| 0.047           | 7.959           | 3.630           | 0.000           |
| 0.263           | 7.859           | 2.486           | 0.000           |
| 0.208           | 8.619           | 3.752           | 0.000           |
| 0.327           | 12.122          | 2.542           | 0.000           |
| 0.198           | 5.971           | 3.451           | 0.000           |
| 0.000           | 6.913           | 3.144           | 0.000           |
| 0.666           | 6.516           | 2.065           | 0.000           |
| 0.164           | 8.261           | 1.869           | 0.000           |
| 0.169           | 10.127          | 3.644           | 0.000           |
| 0.131           | 8.781           | 3.190           | 0.000           |
| 0.041           | 7.846           | 3.985           | 0.000           |
| 0.182           | 4.922           | 3.374           | 0.000           |
| 0.082           | 5.413           | 2.255           | 0.000           |
| 0.141           | 8.595           | 4.207           | 0.000           |
| 0.112           | 5.901           | 3.781           | 0.000           |
| 0.043           | 11.407          | 2.538           | 0.000           |
| 0.091           | 13.324          | 2.547           | 0.000           |
| 0.243           | 6.313           | 2.333           | 0.000           |
| 0.000           | 7.529           | 6.417           | 0.000           |
| 0.098           | 6.058           | 3.666           | 0.052           |
| 0.334           | 10.816          | 1.605           | 0.000           |
| 0.093           | 8.085           | 2.750           | 0.000           |
| 0.048           | 8.202           | 4.096           | 0.000           |
| 0.055           | 7.993           | 2.574           | 0.058           |
| 0.288           | 7.846           | 5.882           | 0.000           |
| 0.000           | 6.486           | 3.243           | 0.000           |
| 0.096           | 7.257           | 4.858           | 0.000           |
| 0.119           | 4.202           | 5.795           | 0.000           |
| 0.083           | 7.012           | 5.081           | 0.000           |
| 0.048           | 6.167           | 4.789           | 0.000           |
| 0.233           | 8.849           | 3.498           | 0.000           |
| 0.590           | 7.708           | 2.441           | 0.000           |
| 0.267           | 9.713           | 3.387           | 0.000           |
| 0.043           | 7.819           | 4.137           | 0.000           |
| 0.170           | 10.740          | 3.591           | 0.134           |
| 0.152           | 7.978           | 4.148           | 0.000           |
| 0.105           | 8.129           | 2.780           | 0.000           |
| 0.052           | 5.213           | 2.079           | 0.056           |
| 0.220           | 9.831           | 2.954           | 0.000           |
| 0.048           | 8.798           | 3.091           | 0.000           |
| 0.125           | 7.498           | 2.581           | 0.000           |
| 0.133           | 8.715           | 3.453           | 0.000           |
| 0.173           | 8.400           | 4.074           | 0.000           |
| 0.095           | 11.188          | 2.056           | 0.000           |
| 0.289           | 7.011           | 4.261           | 0.000           |
| 0.125           | 10.084          | 3.760           | 0.000           |
| 0.316           | 7.138           | 2.167           | 0.042           |
| 0.159           | 6.814           | 7.970           | 0.000           |
| 0.428           | 7.662           | 2.627           | 0.000           |
| 0.217           | 7.955           | 2.593           | 0.000           |
| 0.077           | 7.948           | 2.370           | 0.000           |
| 0.212           | 7.016           | 3.853           | 0.000           |
| 0.552           | 9.115           | 3.818           | 0.000           |
| 0.137           | 8.390           | 3.329           | 0.000           |
| 0.216           | 9.396           | 1.963           | 0.000           |
| 0.086           | 7.232           | 2.936           | 0.000           |
| 0.160           | 7.522           | 2.979           | 0.000           |
| 0.000           | 11.701          | 5.378           | 0.000           |
| 0.368           | 6.971           | 3.637           | 0.000           |
| 0.115           | 7.074           | 7.521           | 0.000           |
| 0.082           | 13.824          | 3.874           | 0.043           |
| 0.137           | 7.211           | 3.140           | 0.000           |
| 0.118           | 7.972           | 4.874           | 0.000           |
| 0.000           | 7.869           | 4.241           | 0.000           |
| 0.322           | 7.075           | 2.777           | 0.000           |
| 0.357           | 10.105          | 3.838           | 0.000           |
| 0.282           | 10.982          | 2.057           | 0.000           |
| 0.206           | 7.438           | 2.998           | 0.000           |
| 0.562           | 8.263           | 2.338           | 0.263           |
| 0.113           | 7.063           | 1.983           | 0.000           |
| 0.149           | 8.764           | 3.453           | 0.000           |
| 0.170           | 7.630           | 1.922           | 0.000           |
| 0.068           | 6.971           | 2.670           | 0.000           |
| 0.334           | 8.569           | 2.751           | 0.000           |
| 0.572           | 9.297           | 3.776           | 0.000           |
| 0.240           | 6.230           | 2.087           | 0.000           |
| 0.000           | 7.655           | 1.092           | 0.000           |
| 0.440           | 5.000           | 0.984           | 0.232           |
| 0.172           | 5.815           | 1.625           | 0.000           |
| 0.051           | 6.388           | 4.003           | 0.000           |
| 0.058           | 8.258           | 2.366           | 0.000           |
| 0.097           | 6.833           | 4.143           | 0.000           |
| 0.103           | 6.921           | 2.673           | 0.000           |
| 0.162           | 8.285           | 6.079           | 0.000           |
| 0.127           | 11.152          | 2.465           | 0.000           |
| 0.000           | 7.449           | 4.036           | 0.000           |
| 0.075           | 6.635           | 3.159           | 0.000           |
| 0.120           | 7.148           | 5.557           | 0.000           |
| 0.124           | 7.974           | 4.106           | 0.000           |
| 0.120           | 8.149           | 4.477           | 0.000           |
| 0.042           | 9.208           | 2.743           | 0.000           |
| 0.121           | 6.264           | 4.528           | 0.000           |
| 0.140           | 8.525           | 4.370           | 0.000           |
| 0.098           | 10.923          | 3.700           | 0.000           |
| 0.200           | 6.019           | 4.149           | 0.000           |
| 0.253           | 7.763           | 4.914           | 0.000           |
| 0.197           | 7.367           | 2.880           | 0.000           |
| 0.049           | 7.129           | 2.970           | 0.000           |
| 0.256           | 3.634           | 1.025           | 0.000           |
| 0.125           | 5.952           | 1.933           | 0.000           |
| 0.161           | 7.878           | 2.710           | 0.000           |
| 0.123           | 7.854           | 3.802           | 0.000           |
| 0.108           | 8.481           | 3.213           | 0.000           |
| 0.099           | 8.713           | 3.158           | 0.000           |
| 0.131           | 6.765           | 4.507           | 0.000           |
| 0.041           | 8.528           | 4.328           | 0.000           |
| 0.103           | 7.961           | 2.174           | 0.000           |
| 0.243           | 7.188           | 1.280           | 0.000           |
| 0.046           | 8.313           | 2.439           | 0.000           |
| 0.047           | 8.094           | 3.657           | 0.000           |
| 0.403           | 8.875           | 3.213           | 0.000           |
| 0.191           | 11.193          | 2.098           | 0.000           |
| 0.000           | 7.376           | 1.828           | 0.000           |
| 0.044           | 5.033           | 3.003           | 0.000           |
| 0.203           | 8.654           | 3.277           | 0.000           |
| 0.308           | 8.078           | 3.093           | 0.046           |
| 0.168           | 8.927           | 2.863           | 0.000           |
| 0.152           | 8.020           | 3.328           | 0.040           |
| 0.228           | 8.538           | 3.021           | 0.000           |
| 0.250           | 4.905           | 1.531           | 0.158           |
| 0.496           | 8.260           | 1.957           | 0.000           |
| 0.140           | 9.822           | 3.074           | 0.000           |
| 0.178           | 7.979           | 5.082           | 0.000           |
| 0.435           | 6.361           | 3.413           | 0.000           |
| 0.151           | 10.152          | 4.109           | 0.000           |
| 0.071           | 10.037          | 2.254           | 0.000           |
| 0.231           | 5.440           | 5.464           | 0.000           |
| 0.000           | 7.943           | 3.614           | 0.000           |
| 0.345           | 6.542           | 2.207           | 0.000           |
| 0.333           | 7.488           | 2.340           | 0.000           |
| 0.321           | 8.658           | 8.867           | 0.000           |
| 0.327           | 7.649           | 2.942           | 0.000           |
| 0.181           | 7.270           | 2.991           | 0.000           |
| 0.204           | 7.648           | 2.528           | 0.000           |
| 0.165           | 7.266           | 5.102           | 0.000           |
| 0.269           | 10.563          | 2.034           | 0.000           |
| 0.236           | 6.792           | 2.587           | 0.000           |
| 0.352           | 7.496           | 2.474           | 0.000           |
| 0.183           | 7.434           | 2.112           | 0.000           |
| 0.099           | 8.750           | 5.994           | 0.000           |
| 0.312           | 10.522          | 4.336           | 0.000           |
| 0.000           | 20.518          | 2.964           | 0.000           |

Table S3. Expression data (n FPKM) from 144 patients with glioblastoma and 500 genes from TCGA.

| sample       | OS    | OS time  | ENSG00000231056 | ENSG00000251127 | ENSG00000104629 | ENSG00000258779 | ENSG00000133372 | ENSG00000195869 | ENSG00000120729 | ENSG00000261395 | ENSG00000223624 | ENSG00000163682 | ENSG00000170099 | ENSG00000259030 | ENSG00000189366 | ENSG00000223982 |
|--------------|-------|----------|-----------------|-----------------|-----------------|-----------------|-----------------|-----------------|-----------------|-----------------|-----------------|-----------------|-----------------|-----------------|-----------------|-----------------|
| TCGA_02.0047 | 1.000 | 448.000  | 0.000           | 0.000           | 7.119           | 0.000           | 6.006           | 0.161           | 1.240           | 0.354           | 0.354           | 0.855           | 0.080           | 0.079           | 0.793           | 0.000           |
| TCGA_02.0055 | 1.000 | 76.000   | 0.000           | 0.000           | 13.132          | 0.000           | 7.238           | 0.084           | 0.291           | 0.387           | 0.150           | 327.347         | 0.045           | 0.063           | 0.000           | 0.000           |
| TCGA_02.2483 | 0.000 | 466.000  | 0.000           | 0.000           | 27.896          | 0.000           | 11.981          | 0.049           | 0.272           | 0.344           | 0.803           | 383.848         | 0.020           | 0.032           | 0.622           | 0.000           |
| TCGA_02.2485 | 0.000 | 470.000  | 0.000           | 0.000           | 11.477          | 0.000           | 13.102          | 0.203           | 0.059           | 0.196           | 0.465           | 149.144         | 0.000           | 0.113           | 0.881           | 0.000           |
| TCGA_06.2486 | 1.000 | 265.000  | 0.000           | 0.000           | 10.725          | 0.256           | 9.248           | 0.062           | 0.341           | 0.361           | 0.525           | 207.012         | 0.020           | 0.020           | 0.000           | 0.000           |
| TCGA_06.0129 | 1.000 | 986.000  | 0.000           | 0.000           | 13.080          | 0.000           | 13.500          | 0.000           | 2.469           | 0.000           | 0.696           | 0.000           | 0.000           | 0.128           | 1.062           | 0.000           |
| TCGA_06.0130 | 1.000 | 320.000  | 0.000           | 0.000           | 8.848           | 0.023           | 10.497          | 0.182           | 0.203           | 0.463           | 0.150           | 172.895         | 0.057           | 0.031           | 0.125           | 0.000           |
| TCGA_06.0132 | 1.000 | 570.000  | 0.000           | 0.000           | 7.379           | 0.000           | 7.505           | 0.029           | 1.643           | 0.183           | 0.000           | 233.771         | 0.000           | 0.040           | 2.398           | 0.000           |
| TCGA_06.0138 | 1.000 | 674.000  | 0.000           | 0.000           | 6.978           | 0.000           | 5.475           | 0.056           | 1.304           | 0.189           | 0.733           | 282.288         | 0.000           | 0.033           | 3.167           | 0.000           |
| TCGA_06.0139 | 1.000 | 327.000  | 0.000           | 0.000           | 7.321           | 0.000           | 5.702           | 0.000           | 0.620           | 0.824           | 2.135           | 268.804         | 0.000           | 0.040           | 0.000           | 0.000           |
| TCGA_06.0141 | 1.000 | 280.000  | 0.000           | 0.000           | 5.603           | 0.000           | 7.330           | 0.072           | 1.193           | 0.337           | 1.753           | 149             | 0.000           | 0.000           | 0.104           | 0.000           |
| TCGA_06.0152 | 1.000 | 359.000  | 0.014           | 0.000           | 10.042          | 0.000           | 12.199          | 0.157           | 0.085           | 0.140           | 0.000           | 84.985          | 0.000           | 0.061           | 1.738           | 0.000           |
| TCGA_06.0157 | 1.000 | 97.000   | 0.000           | 0.000           | 6.541           | 0.000           | 11.013          | 0.051           | 0.020           | 0.433           | 0.420           | 82.944          | 0.000           | 0.042           | 0.814           | 0.000           |
| TCGA_06.0158 | 1.000 | 166.000  | 0.000           | 0.000           | 11.082          | 0.020           | 11.769          | 0.202           | 0.292           | 0.524           | 0.524           | 64.511          | 0.000           | 0.051           | 0.674           | 0.000           |
| TCGA_06.0188 | 1.000 | 579.000  | 0.000           | 0.000           | 9.017           | 0.000           | 11.054          | 0.138           | 0.311           | 0.801           | 2.335           | 135.714         | 0.000           | 0.017           | 0.388           | 0.000           |
| TCGA_06.0171 | 1.000 | 396.000  | 0.000           | 0.000           | 7.051           | 0.000           | 6.995           | 0.151           | 0.444           | 0.057           | 0.131           | 76.338          | 0.020           | 0.045           | 0.246           | 0.000           |
| TCGA_06.0174 | 1.000 | 57.000   | 0.000           | 0.000           | 10.357          | 0.000           | 10.357          | 0.037           | 0.300           | 0.165           | 128.907         | 0.000           | 0.059           | 0.059           | 0.064           | 0.000           |
| TCGA_06.0178 | 1.000 | 1642.000 | 0.000           | 0.000           | 8.503           | 0.000           | 6.084           | 0.011           | 1.042           | 0.277           | 0.898           | 847.948         | 0.000           | 0.038           | 2.862           | 0.000           |
| TCGA_06.0184 | 1.000 | 1228.000 | 0.000           | 0.000           | 10.904          | 0.021           | 6.848           | 0.133           | 0.899           | 0.281           | 0.273           | 233.361         | 0.021           | 0.084           | 2.223           | 0.000           |
| TCGA_06.0187 | 1.000 | 801.000  | 0.000           | 0.000           | 7.254           | 0.000           | 11.704          | 0.142           | 0.064           | 0.451           | 0.292           | 86.129          | 0.000           | 0.035           | 0.776           | 0.000           |
| TCGA_06.0219 | 1.000 | 11.000   | 0.000           | 0.000           | 6.794           | 0.024           | 6.523           | 0.047           | 1.062           | 0.561           | 0.311           | 449.794         | 0.000           | 0.021           | 0.103           | 0.000           |
| TCGA_06.0221 | 1.000 | 69.000   | 0.016           | 0.000           | 7.332           | 0.000           | 14.817          | 0.518           | 0.459           | 0.166           | 1.448           | 65.955          | 0.000           | 0.048           | 0.641           | 0.000           |
| TCGA_06.0238 | 1.000 | 359.000  | 0.000           | 0.000           | 7.507           | 0.000           | 7.714           | 0.076           | 0.077           | 0.486           | 0.472           | 343.512         | 0.024           | 0.040           | 0.836           | 0.000           |
| TCGA_06.0644 | 1.000 | 375.000  | 0.000           | 0.000           | 8.476           | 0.000           | 11.257          | 0.041           | 0.168           | 0.207           | 0.535           | 131.215         | 0.040           | 0.012           | 0.533           | 0.000           |
| TCGA_06.0645 | 1.000 | 98.000   | 0.015           | 0.000           | 9.162           | 0.000           | 9.988           | 0.091           | 0.252           | 0.153           | 0.447           | 159.284         | 0.000           | 0.031           | 0.989           | 0.000           |
| TCGA_06.0646 | 1.000 | 136.000  | 0.000           | 0.000           | 12.124          | 0.000           | 14.993          | 0.688           | 0.570           | 0.319           | 0.465           | 64.143          | 0.000           | 0.058           | 0.592           | 0.000           |
| TCGA_06.0649 | 1.000 | 62.000   | 0.018           | 0.000           | 7.962           | 0.000           | 8.855           | 0.268           | 0.581           | 0.325           | 0.119           | 176.596         | 0.000           | 0.119           | 1.290           | 0.000           |
| TCGA_06.0696 | 1.000 | 296.000  | 0.000           | 0.000           | 10.365          | 0.000           | 10.365          | 0.000           | 0.131           | 1.149           | 0.478           | 338             | 0.000           | 0.028           | 0.068           | 0.000           |
| TCGA_06.0743 | 1.000 | 679.000  | 0.000           | 0.000           | 11.420          | 0.000           | 12.548          | 0.243           | 0.639           | 0.237           | 0.461           | 111.405         | 0.012           | 0.032           | 2.372           | 0.000           |
| TCGA_06.0744 | 1.000 | 595.000  | 0.000           | 0.000           | 14.240          | 0.000           | 8.828           | 0.423           | 0.157           | 0.772           | 0.772           | 308.058         | 0.000           | 0.049           | 0.770           | 0.000           |
| TCGA_06.0745 | 1.000 | 164.000  | 0.000           | 0.000           | 12.422          | 0.000           | 9.390           | 0.039           | 1.525           | 0.327           | 0.327           | 215.439         | 0.000           | 0.034           | 4.178           | 0.000           |
| TCGA_06.0747 | 1.000 | 82.000   | 0.000           | 0.000           | 13.492          | 0.021           | 15.512          | 0.308           | 0.174           | 0.137           | 0.399           | 88.562          | 0.000           | 0.092           | 1.681           | 0.000           |
| TCGA_06.0749 | 1.000 | 95.000   | 0.000           | 0.000           | 10.964          | 0.000           | 9.672           | 0.098           | 2.202           | 0.272           | 0.272           | 221.546         | 0.000           | 0.021           | 0.596           | 0.000           |
| TCGA_06.0750 | 1.000 | 28.000   | 0.000           | 0.000           | 7.293           | 0.000           | 10.496          | 0.109           | 0.318           | 0.692           | 0.149           | 131.124         | 0.000           | 0.076           | 0.099           | 0.000           |
| TCGA_06.0878 | 1.000 | 218.000  | 0.032           | 0.000           | 7.993           | 0.000           | 12.347          | 0.153           | 0.473           | 1.461           | 0.946           | 147.751         | 0.000           | 0.109           | 1.676           | 0.000           |
| TCGA_06.0882 | 1.000 | 165.000  | 0.015           | 0.000           | 7.924           | 0.000           | 9.964           | 0.269           | 0.498           | 0.515           | 0.000           | 147.781         | 0.000           | 0.074           | 1.186           | 0.000           |
| TCGA_06.1804 | 1.000 | 414.000  | 0.000           | 0.000           | 21.581          | 0.000           | 10.194          | 0.391           | 0.733           | 0.582           | 0.273           | 35.872          | 0.000           | 0.043           | 0.408           | 0.057           |
| TCGA_06.2557 | 1.000 | 33.000   | 0.000           | 0.000           | 10.925          | 0.000           | 14.035          | 0.133           | 0.343           | 0.140           | 0.817           | 96.279          | 0.000           | 0.094           | 0.453           | 0.000           |
| TCGA_06.2558 | 1.000 | 23.000   | 0.000           | 0.000           | 8.434           | 0.000           | 8.434           | 0.000           | 1.148           | 0.335           | 0.335           | 246.858         | 0.000           | 0.012           | 0.574           | 0.000           |
| TCGA_06.2559 | 1.000 | 150.000  | 0.000           | 0.000           | 0.256           | 0.000           | 11.302          | 0.204           | 1.365           | 0.259           | 0.358           | 244.350         | 0.000           | 0.111           | 0.307           | 0.000           |
| TCGA_06.2561 | 1.000 | 282.000  | 0.000           | 0.000           | 7.730           | 0.000           | 13.651          | 0.356           | 0.396           | 0.258           | 0.167           | 105.189         | 0.000           | 0.040           | 0.655           | 0.000           |
| TCGA_06.2562 | 1.000 | 86.000   | 0.014           | 0.000           | 7.369           | 0.022           | 11.892          | 0.180           | 0.116           | 0.218           | 0.000           | 108.935         | 0.000           | 0.057           | 0.962           | 0.000           |
| TCGA_06.2563 | 1.000 | 932.000  | 0.000           | 0.000           | 10.426          | 0.024           | 13.600          | 0.057           | 0.098           | 0.400           | 0.000           | 185.555         | 0.000           | 0.049           | 1.626           | 0.000           |
| TCGA_06.2564 | 1.000 | 61.000   | 0.014           | 0.000           | 8.227           | 0.000           | 12.692          | 0.130           | 0.503           | 0.137           | 0.133           | 108.157         | 0.000           | 0.110           | 1.053           | 0.000           |
| TCGA_06.2565 | 1.000 | 207.000  | 0.000           | 0.000           | 0.216           | 0.000           | 11.710          | 0.708           | 0.055           | 0.146           | 0.294           | 142.143         | 0.032           | 0.053           | 1.275           | 0.000           |
| TCGA_06.2567 | 1.000 | 133.000  | 0.000           | 0.000           | 9.989           | 0.000           | 14.028          | 0.624           | 0.221           | 0.357           | 0.416           | 97.833          | 0.010           | 0.058           | 0.368           | 0.000           |
| TCGA_06.2569 | 0.000 | 13.000   | 0.016           | 0.000           | 0.232           | 0.000           | 10.682          | 0.111           | 0.236           | 0.179           | 0.000           | 870.573         | 0.000           | 0.071           | 0.811           | 0.000           |
| TCGA_06.2570 | 1.000 | 958.000  | 0.016           | 0.000           | 15.257          | 0.000           | 6.915           | 0.207           | 0.942           | 0.080           | 0.154           | 217.959         | 0.000           | 0.057           | 1.334           | 0.000           |
| TCGA_06.2578 | 1.000 | 342.000  | 0.000           | 0.000           | 8.990           | 0.000           | 18.787          | 0.081           | 0.344           | 0.344           | 0.134           | 135.391         | 0.030           | 0.052           | 1.290           | 0.000           |
| TCGA_06.5410 | 1.000 | 198.000  | 0.000           | 0.000           | 8.453           | 0.000           | 8.453           | 0.000           | 0.862           | 0.586           | 0.586           | 183.527         | 0.000           | 0.040           | 0.652           | 0.000           |
| TCGA_06.5411 | 1.000 | 254.000  | 0.000           | 0.000           | 6.874           | 0.000           | 7.835           | 0.178           | 1.194           | 0.327           | 0.254           | 176.863         | 0.038           | 0.063           | 2.768           | 0.053           |
| TCGA_06.5412 | 1.000 | 138.000  | 0.000           | 0.208           | 9.707           | 0.000           | 10.002          | 0.108           | 0.139           | 0.563           | 0.684           | 189.027         | 0.041           | 0.027           | 0.522           | 0.000           |
| TCGA_06.5413 | 1.000 | 268.000  | 0.000           | 0.000           | 8.925           | 0.000           | 11.044          | 0.085           | 0.128           | 0.502           | 0.557           | 176.082         | 0.000           | 0.096           | 1.295           | 0.000           |
| TCGA_06.5414 | 1.000 | 273.000  | 0.000           | 0.000           | 8.606           | 0.000           | 11.829          | 0.900           | 0.131           | 0.317           | 0.123           | 135.445         | 0.019           | 0.039           | 1.124           | 0.000           |
| TCGA_06.5416 | 1.000 | 161.000  | 0.000           | 0.000           | 10.184          | 0.000           | 9.786           | 0.268           | 4.208           | 0.268           | 0.268           | 205.566         | 0.000           | 0.017           | 0.037           | 0.000           |
| TCGA_06.5417 | 1.000 | 155.000  | 0.000           | 0.000           | 12.008          | 0.000           | 8.500           | 0.308           | 4.572           | 0.608           | 1.181           | 322.707         | 0.000           | 0.097           | 1.177           | 0.000           |
| TCGA_06.5418 | 1.000 | 83.000   | 0.015           | 0.000           | 9.641           | 0.000           | 12.022          | 0.453           | 0.305           | 0.453           | 0.147           | 197.875         | 0.000           | 0.070           | 0.024           | 0.000           |
| TCGA_06.5856 | 1.000 | 114.000  | 0.000           | 0.000           | 6.974           | 0.000           | 10.952          | 0.169           | 0.357           | 0.893           | 142.077         | 0.010           | 0.116           | 1.773           | 0.058           |                 |
| TCGA_06.5858 | 1.000 | 187.000  | 0.000           | 0.000           | 5.960           | 0.000           | 10.941          | 0.352           | 0.600           | 0.638           | 0.689           | 82.336          | 0.000           | 0.095           | 0.892           | 0.000           |
| TCGA_06.5859 | 1.000 | 139.000  | 0.000           | 0.000           | 7.118           | 0.000           | 14.900          | 0.336           | 3.652           | 0.662           | 0.257           | 87.638          | 0.029           | 0.015           | 0.683           | 0.000           |
| TCGA_06.0398 | 1.000 | 61.000   | 0.000           | 0.000           | 8.453           | 0.000           | 8.453           | 0.000           | 0.614           | 0.148           | 0.335           | 69.233          | 0.000           | 0.071           | 1.206           | 0.000           |
| TCGA_12.0616 | 1.000 | 439.000  | 0.000           | 0.000           | 14.431          | 0.037           | 6.611           | 0.115           | 0.686           | 0.728           | 1.179           | 425.626         | 0.000           | 0.049           | 2.114           | 0.000           |
| TCGA_12.0618 | 1.000 | 50.000   | 0.000           | 0.000           | 9.377           | 0.000           | 13.428          | 0.231           | 1.057           | 0.253           | 0.859           | 132.943         | 0.000           | 0.101           | 0.102           | 0.652           |
| TCGA_12.0619 | 1.000 | 316.000  | 0.000           | 0.000           | 11.433          | 0.000           | 9.834           | 0.098           | 2.057           | 0.068           | 0.263           | 61.127          | 0.119           | 0.134           | 0.066           | 0.655           |
| TCGA_12.0821 | 1.000 | 323.000  | 0.000           | 0.000           | 6.823           | 0.000           | 14.620          | 0.000           | 1.285           | 0.302           | 0.263           | 167.378         | 0.033           | 0.033           | 1.851           | 0.000           |
| TCGA         |       |          |                 |                 |                 |                 |                 |                 |                 |                 |                 |                 |                 |                 |                 |                 |

| ENSG0000022884 | ENSG0000025189 | ENSG0000026233 | ENSG0000026927 | ENSG00000129354 | ENSG00000265692 | ENSG00000231229 | ENSG00000280959 | ENSG00000274425 | ENSG00000229887 | ENSG00000241438 | ENSG00000197891 | ENSG00000298489 | ENSG00000252061 |
|----------------|----------------|----------------|----------------|-----------------|-----------------|-----------------|-----------------|-----------------|-----------------|-----------------|-----------------|-----------------|-----------------|
| 1.096          | 0.062          | 12.247         | 0.000          | 0.065           | 0.000           | 0.062           | 0.000           | 0.155           | 4.904           | 0.129           | 0.055           | 0.000           | 0.276           |
| 0.418          | 0.079          | 118.656        | 0.000          | 0.495           | 0.266           | 0.047           | 0.055           | 0.000           | 0.297           | 3.928           | 0.087           | 0.000           | 0.000           |
| 0.515          | 0.105          | 13.726         | 0.000          | 0.024           | 0.017           | 0.135           | 0.000           | 0.470           | 3.368           | 0.350           | 0.000           | 0.000           | 0.000           |
| 0.389          | 0.040          | 32.528         | 0.000          | 0.111           | 0.029           | 0.070           | 0.000           | 0.000           | 0.100           | 5.211           | 0.110           | 0.237           | 0.000           |
| 1.225          | 0.069          | 60.619         | 0.000          | 0.031           | 0.001           | 0.001           | 0.000           | 0.000           | 0.000           | 10.252          | 0.059           | 0.000           | 0.000           |
| 0.712          | 0.023          | 6.303          | 0.000          | 0.024           | 0.034           | 0.268           | 0.000           | 0.005           | 0.205           | 7.216           | 0.155           | 0.083           | 0.011           |
| 1.283          | 0.588          | 51.648         | 0.000          | 0.165           | 0.009           | 0.093           | 0.000           | 0.000           | 0.560           | 5.619           | 0.065           | 0.094           | 0.000           |
| 0.882          | 0.083          | 28.159         | 0.000          | 0.000           | 0.161           | 0.049           | 0.000           | 0.000           | 0.035           | 3.897           | 0.115           | 0.000           | 0.007           |
| 1.881          | 0.080          | 52.606         | 0.000          | 0.134           | 0.012           | 0.298           | 0.000           | 0.000           | 0.563           | 7.317           | 0.080           | 0.057           | 0.000           |
| 1.483          | 0.186          | 73.215         | 0.000          | 0.098           | 0.000           | 0.124           | 0.000           | 0.000           | 0.000           | 5.376           | 0.155           | 0.000           | 0.044           |
| 1.121          | 0.091          | 59.007         | 0.000          | 0.192           | 0.058           | 0.132           | 0.000           | 0.000           | 0.115           | 9.079           | 0.057           | 0.000           | 0.005           |
| 0.464          | 0.059          | 25.580         | 0.000          | 0.099           | 0.052           | 0.052           | 0.000           | 0.000           | 0.030           | 5.973           | 0.217           | 0.000           | 0.011           |
| 1.168          | 0.073          | 23.570         | 0.000          | 0.026           | 0.000           | 0.076           | 0.000           | 0.000           | 0.031           | 5.329           | 0.020           | 0.088           | 0.000           |
| 0.532          | 0.000          | 10.829         | 0.000          | 0.072           | 0.058           | 0.051           | 0.000           | 0.000           | 0.201           | 6.562           | 0.076           | 0.082           | 0.005           |
| 0.873          | 0.000          | 18.434         | 0.000          | 0.107           | 0.074           | 0.045           | 0.000           | 0.000           | 0.128           | 4.875           | 0.085           | 0.000           | 0.024           |
| 0.673          | 0.377          | 30.442         | 0.000          | 0.048           | 0.075           | 0.081           | 0.000           | 0.000           | 0.000           | 4.618           | 0.087           | 0.000           | 0.000           |
| 1.131          | 0.000          | 25.965         | 0.000          | 0.111           | 0.019           | 0.070           | 0.000           | 0.000           | 0.398           | 2.804           | 0.176           | 0.047           | 0.006           |
| 1.918          | 0.016          | 19.484         | 0.000          | 0.000           | 0.057           | 0.014           | 0.000           | 0.000           | 0.551           | 7.059           | 0.028           | 0.056           | 0.000           |
| 1.226          | 0.048          | 63.972         | 0.019          | 0.250           | 0.043           | 0.127           | 0.025           | 0.000           | 0.090           | 2.680           | 0.079           | 0.043           | 0.006           |
| 0.312          | 0.051          | 36.741         | 0.000          | 0.214           | 0.000           | 0.056           | 0.000           | 0.000           | 0.032           | 4.395           | 0.127           | 0.000           | 0.000           |
| 1.963          | 0.041          | 59.084         | 0.000          | 0.171           | 0.069           | 0.072           | 0.000           | 0.000           | 0.137           | 9.675           | 0.158           | 0.000           | 0.013           |
| 0.447          | 0.014          | 2.715          | 0.022          | 0.059           | 0.092           | 0.100           | 0.000           | 0.000           | 0.212           | 2.819           | 0.164           | 0.050           | 0.060           |
| 1.277          | 0.014          | 13.839         | 0.000          | 0.058           | 0.040           | 0.085           | 0.000           | 0.000           | 0.725           | 4.258           | 0.183           | 0.000           | 0.007           |
| 0.486          | 0.035          | 54.874         | 0.000          | 0.147           | 0.008           | 0.093           | 0.000           | 0.000           | 0.205           | 6.510           | 0.058           | 0.000           | 0.019           |
| 0.477          | 0.117          | 39.876         | 0.000          | 0.000           | 0.009           | 0.046           | 0.000           | 0.000           | 0.131           | 3.827           | 0.087           | 0.000           | 0.000           |
| 1.125          | 0.027          | 23.214         | 0.021          | 0.057           | 0.069           | 0.192           | 0.000           | 0.000           | 0.442           | 7.555           | 0.090           | 0.145           | 0.019           |
| 1.198          | 0.186          | 20.162         | 0.024          | 0.032           | 0.022           | 0.325           | 0.000           | 0.000           | 0.077           | 9.770           | 0.127           | 0.164           | 0.000           |
| 1.252          | 0.134          | 11.479         | 0.000          | 0.093           | 0.020           | 0.043           | 0.000           | 0.000           | 0.474           | 3.347           | 0.129           | 0.000           | 0.026           |
| 0.919          | 0.040          | 16.735         | 0.000          | 0.056           | 0.019           | 0.168           | 0.000           | 0.000           | 0.404           | 10.784          | 0.112           | 0.192           | 0.000           |
| 1.156          | 0.054          | 14.262         | 0.000          | 0.000           | 0.029           | 0.108           | 0.000           | 0.000           | 0.475           | 5.658           | 0.112           | 0.000           | 0.006           |
| 1.901          | 0.100          | 64.861         | 0.000          | 0.023           | 0.024           | 0.138           | 0.000           | 0.000           | 0.307           | 9.401           | 0.092           | 0.079           | 0.005           |
| 0.711          | 0.012          | 8.993          | 0.000          | 0.000           | 0.017           | 0.072           | 0.000           | 0.000           | 0.205           | 8.227           | 0.136           | 0.000           | 0.000           |
| 1.131          | 0.000          | 11.310         | 0.000          | 0.057           | 0.225           | 0.168           | 0.000           | 0.000           | 0.170           | 6.168           | 0.023           | 0.000           | 0.000           |
| 0.882          | 0.026          | 27.994         | 0.000          | 0.246           | 0.009           | 0.219           | 0.000           | 0.000           | 0.229           | 9.378           | 0.043           | 0.000           | 0.000           |
| 0.741          | 0.000          | 46.088         | 0.000          | 0.000           | 0.020           | 0.073           | 0.000           | 0.000           | 0.277           | 11.666          | 0.229           | 0.000           | 0.000           |
| 0.855          | 0.050          | 39.215         | 0.000          | 0.183           | 0.045           | 0.044           | 0.000           | 0.000           | 0.031           | 6.388           | 0.083           | 0.045           | 0.006           |
| 1.166          | 0.131          | 4.529          | 0.037          | 0.000           | 0.086           | 0.897           | 0.025           | 0.000           | 0.090           | 11.275          | 0.040           | 0.085           | 0.034           |
| 1.048          | 0.332          | 14.126         | 0.000          | 0.000           | 0.017           | 0.095           | 0.000           | 0.000           | 0.209           | 4.174           | 0.059           | 0.085           | 0.000           |
| 1.424          | 0.024          | 13.880         | 0.000          | 0.089           | 0.020           | 0.265           | 0.000           | 0.000           | 0.151           | 4.937           | 0.047           | 0.054           | 0.000           |
| 0.574          | 0.059          | 38.148         | 0.000          | 0.031           | 0.021           | 0.075           | 0.000           | 0.000           | 0.553           | 5.387           | 0.098           | 0.052           | 0.035           |
| 0.857          | 0.116          | 60.336         | 0.000          | 0.183           | 0.032           | 0.065           | 0.000           | 0.000           | 0.000           | 13.090          | 0.073           | 0.104           | 0.000           |
| 0.875          | 0.062          | 61.592         | 0.000          | 0.103           | 0.000           | 0.044           | 0.000           | 0.000           | 0.124           | 8.413           | 0.062           | 0.000           | 0.006           |
| 0.664          | 0.027          | 35.507         | 0.000          | 0.000           | 0.010           | 0.072           | 0.000           | 0.000           | 0.136           | 7.991           | 0.113           | 0.097           | 0.000           |
| 0.295          | 0.020          | 26.432         | 0.000          | 0.024           | 0.025           | 0.062           | 0.024           | 0.000           | 0.000           | 7.265           | 0.058           | 0.042           | 0.011           |
| 1.276          | 0.037          | 54.634         | 0.000          | 0.026           | 0.000           | 0.121           | 0.078           | 0.000           | 0.094           | 9.231           | 0.062           | 0.044           | 0.006           |
| 1.333          | 0.121          | 8.422          | 0.000          | 0.101           | 0.053           | 0.407           | 0.000           | 0.000           | 0.091           | 10.157          | 0.020           | 0.000           | 0.017           |
| 0.163          | 0.013          | 18.494         | 0.000          | 0.056           | 0.019           | 0.047           | 0.000           | 0.000           | 0.301           | 2.011           | 0.222           | 0.095           | 0.006           |
| 0.825          | 0.054          | 13.782         | 0.000          | 0.000           | 0.029           | 0.084           | 0.000           | 0.000           | 0.271           | 3.864           | 0.225           | 0.145           | 0.006           |
| 0.429          | 0.035          | 37.282         | 0.000          | 0.049           | 0.017           | 0.031           | 0.000           | 0.000           | 0.206           | 6.696           | 0.156           | 0.000           | 0.000           |
| 1.596          | 0.176          | 74.328         | 0.000          | 0.093           | 0.040           | 0.059           | 0.000           | 0.000           | 0.169           | 3.747           | 0.119           | 0.000           | 0.000           |
| 1.523          | 0.011          | 16.542         | 0.000          | 0.163           | 0.137           | 0.039           | 0.000           | 0.000           | 0.084           | 4.231           | 0.111           | 0.080           | 0.028           |
| 1.608          | 0.131          | 111.218        | 0.000          | 0.000           | 0.009           | 0.254           | 0.000           | 0.000           | 0.030           | 7.895           | 0.099           | 0.000           | 0.000           |
| 0.893          | 0.049          | 35.804         | 0.000          | 0.102           | 0.035           | 0.043           | 0.000           | 0.000           | 0.367           | 6.041           | 0.263           | 0.000           | 0.006           |
| 0.763          | 0.075          | 31.782         | 0.000          | 0.068           | 0.008           | 0.038           | 0.000           | 0.000           | 0.000           | 6.179           | 0.161           | 0.000           | 0.000           |
| 1.454          | 0.041          | 52.919         | 0.000          | 0.000           | 0.000           | 0.062           | 0.000           | 0.000           | 0.000           | 5.058           | 0.071           | 0.056           | 0.000           |
| 0.505          | 0.000          | 12.088         | 0.000          | 0.000           | 0.037           | 0.137           | 0.000           | 0.000           | 0.130           | 3.322           | 0.258           | 0.000           | 0.049           |
| 0.784          | 0.026          | 52.011         | 0.000          | 0.027           | 0.000           | 0.091           | 0.000           | 0.000           | 0.097           | 5.787           | 0.064           | 0.046           | 0.006           |
| 0.889          | 0.097          | 66.637         | 0.000          | 0.025           | 0.026           | 0.150           | 0.000           | 0.000           | 0.517           | 5.300           | 0.141           | 0.000           | 0.006           |
| 0.942          | 0.048          | 19.944         | 0.000          | 0.025           | 0.028           | 0.160           | 0.000           | 0.000           | 0.212           | 7.294           | 0.100           | 0.043           | 0.034           |
| 0.604          | 0.190          | 24.842         | 0.000          | 0.047           | 0.008           | 0.089           | 0.000           | 0.000           | 0.254           | 13.562          | 0.150           | 0.000           | 0.000           |
| 1.143          | 0.055          | 12.470         | 0.000          | 0.062           | 0.000           | 0.062           | 0.000           | 0.000           | 0.284           | 4.151           | 0.046           | 0.105           | 0.042           |
| 0.605          | 0.103          | 15.128         | 0.000          | 0.086           | 0.000           | 0.091           | 0.000           | 0.000           | 0.517           | 7.033           | 0.240           | 0.000           | 0.000           |
| 1.312          | 0.043          | 21.956         | 0.000          | 0.000           | 0.000           | 0.133           | 0.000           | 0.000           | 0.242           | 5.052           | 0.107           | 0.038           | 0.030           |
| 1.097          | 0.080          | 27.351         | 0.000          | 0.289           | 0.042           | 0.061           | 0.000           | 0.000           | 0.231           | 5.472           | 0.096           | 0.000           | 0.016           |
| 1.097          | 0.000          | 26.002         | 0.000          | 0.000           | 0.009           | 0.068           | 0.000           | 0.000           | 0.396           | 9.706           | 0.192           | 0.000           | 0.000           |
| 0.946          | 0.020          | 35.159         | 0.000          | 0.000           | 0.000           | 0.062           | 0.000           | 0.000           | 0.000           | 5.268           | 0.110           | 0.000           | 0.000           |
| 0.829          | 0.023          | 39.459         | 0.000          | 0.047           | 0.000           | 0.040           | 0.000           | 0.000           | 0.113           | 5.271           | 0.150           | 0.000           | 0.000           |
| 1.289          | 0.000          | 174.245        | 0.000          | 0.063           | 0.000           | 0.040           | 0.000           | 0.000           | 0.303           | 7.867           | 0.075           | 0.000           | 0.000           |
| 1.175          | 0.100          | 17.069         | 0.000          | 0.084           | 0.014           | 0.041           | 0.000           | 0.019           | 0.302           | 8.439           | 0.133           | 0.000           | 0.000           |
| 0.696          | 0.095          | 40.492         | 0.000          | 0.033           | 0.000           | 0.042           | 0.000           | 0.000           | 0.000           | 8.478           | 0.132           | 0.000           | 0.007           |
| 0.310          | 0.011          | 65.890         | 0.000          | 0.048           | 0.017           | 0.020           | 0.000           | 0.000           | 0.087           | 6.100           | 0.153           | 0.000           | 0.000           |
| 2.109          | 0.139          | 60.647         | 0.000          | 0.000           | 0.000           | 0.792           | 0.000           | 0.000           | 0.124           | 7.752           | 0.011           | 0.000           | 0.000           |
| 0.542          | 0.053          | 59.617         | 0.000          | 0.111           | 0.031           | 0.131           | 0.000           | 0.000           | 0.027           | 5.538           | 0.053           | 0.038           | 0.000           |
| 1.374          | 0.062          | 43.507         | 0.000          | 0.044           | 0.000           | 0.166           | 0.000           | 0.000           | 0.105           | 9.456           | 0.035           | 0.000           | 0.000           |
| 0.466          | 0.016          | 62.728         | 0.000          | 0.000           | 0.011           | 0.028           | 0.000           | 0.000           | 0.040           | 7.054           | 0.053           | 0.057           | 0.000           |
| 0.842          | 0.000          | 18.779         | 0.000          | 0.000           | 0.014           | 0.051           | 0.000           | 0.000           | 0.144           | 6.113           | 0.127           | 0.000           | 0.027           |
| 1.088          | 0.000          | 30.919         | 0.000          | 0.000           | 0.000           | 0.000           | 0.000           | 0.000           | 0.111           | 5.668           | 0.110           | 0.000           | 0.000           |
| 0.196          | 0.000          | 7.932          | 0.000          | 0.158           | 0.058           | 0.142           | 0.000           | 0.000           | 1.409           | 1.765           | 0.534           | 0.000           | 0.000           |
| 1.813          | 0.084          | 89.820         | 0.000          | 0.071           | 0.012           | 0.075           | 0.000           | 0.000           | 0.296           | 9.229           | 0.028           | 0.000           | 0.000           |
| 0.698          | 0.067          | 64.814         | 0.000          | 0.000           | 0.012           | 0.074           | 0.000           | 0.000           | 0.042           | 9.021           | 0.112           | 0.000           | 0.000           |
| 2.223          | 0.322          | 92.925         | 0.000          | 0.129           | 0.022           | 0.000           | 0.000           | 0.000           | 0.077           | 9.952           | 0.077           | 0.055           | 0.000           |
| 0.857          | 0.048          | 30.605         | 0.000          | 0.025           | 0.009           | 0.000           | 0.000           | 0.000           | 0.243           | 12.903          | 0.121           | 0.000           | 0.000           |
| 0.982          | 0.071          | 14.965         | 0.000          | 0.000           | 0.000           | 0.105           | 0.000           | 0.000           |                 |                 |                 |                 |                 |

| ENSG0000016407 | ENSG0000011293 | ENSG0000019283 | ENSG0000015422 | ENSG00000070761 | ENSG00000234382 | ENSG0000074317 | ENSG00000261838 | ENSG00000268678 | ENSG00000263793 | ENSG00000274055 | ENSG00000203865 | ENSG00000208345 | ENSG00000260676 | ENSG00000360584 | ENSG00000245857 |
|----------------|----------------|----------------|----------------|-----------------|-----------------|----------------|-----------------|-----------------|-----------------|-----------------|-----------------|-----------------|-----------------|-----------------|-----------------|
| 5.586          | 0.564          | 2.187          | 4.167          | 14.902          | 0.000           | 17.162         | 0.000           | 0.000           | 0.000           | 0.017           | 0.000           | 0.000           | 0.000           | 9.482           | 0.000           |
| 8.315          | 0.154          | 0.025          | 6.031          | 12.439          | 0.000           | 10.248         | 0.000           | 0.000           | 0.000           | 0.599           | 0.088           | 0.000           | 0.000           | 12.585          | 0.000           |
| 8.924          | 0.217          | 1.205          | 3.176          | 32.271          | 0.000           | 6.895          | 0.076           | 0.044           | 0.000           | 0.000           | 0.655           | 0.000           | 0.000           | 8.860           | 0.000           |
| 8.191          | 0.380          | 0.171          | 3.680          | 21.066          | 0.043           | 9.804          | 0.000           | 0.000           | 0.000           | 0.751           | 0.000           | 0.000           | 0.000           | 7.838           | 0.000           |
| 4.140          | 0.254          | 0.140          | 5.360          | 15.200          | 0.000           | 5.979          | 0.074           | 0.000           | 0.000           | 0.590           | 0.000           | 0.000           | 0.000           | 9.156           | 0.000           |
| 12.368         | 0.535          | 0.598          | 5.594          | 32.458          | 0.038           | 3.989          | 0.038           | 0.131           | 0.000           | 0.358           | 0.026           | 0.000           | 0.000           | 9.831           | 0.019           |
| 8.881          | 0.081          | 0.014          | 5.234          | 16.262          | 0.000           | 0.555          | 0.127           | 0.049           | 0.000           | 0.000           | 0.564           | 0.000           | 0.000           | 13.146          | 0.000           |
| 4.637          | 0.307          | 0.164          | 4.479          | 13.039          | 0.000           | 99.136         | 0.537           | 0.104           | 0.000           | 0.000           | 0.759           | 0.000           | 0.000           | 8.215           | 0.000           |
| 5.766          | 0.209          | 0.391          | 3.891          | 26.037          | 0.000           | 11.171         | 0.000           | 0.000           | 0.377           | 0.000           | 1.149           | 0.000           | 0.000           | 8.926           | 0.000           |
| 4.287          | 0.137          | 0.032          | 5.284          | 13.025          | 0.000           | 1.974          | 0.000           | 0.000           | 0.000           | 1.003           | 0.000           | 0.000           | 0.000           | 6.559           | 0.000           |
| 4.476          | 0.254          | 0.140          | 5.360          | 15.200          | 0.000           | 5.979          | 0.074           | 0.000           | 0.000           | 0.590           | 0.000           | 0.000           | 0.000           | 9.161           | 0.000           |
| 11.604         | 0.599          | 0.094          | 4.845          | 14.043          | 0.000           | 22.225         | 0.077           | 0.000           | 0.000           | 0.835           | 0.000           | 0.006           | 0.000           | 8.875           | 0.000           |
| 9.785          | 0.562          | 0.235          | 3.851          | 18.960          | 0.000           | 1.300          | 0.040           | 0.184           | 0.000           | 0.000           | 0.925           | 0.000           | 0.013           | 7.680           | 0.000           |
| 8.852          | 1.156          | 0.083          | 5.846          | 17.474          | 0.112           | 10.578         | 0.074           | 0.000           | 0.000           | 1.045           | 0.000           | 0.006           | 0.000           | 7.892           | 0.000           |
| 7.846          | 0.332          | 0.202          | 4.918          | 11.390          | 0.000           | 37.236         | 0.824           | 0.000           | 0.000           | 1.263           | 0.000           | 0.000           | 0.000           | 6.657           | 0.000           |
| 8.402          | 0.258          | 0.020          | 6.471          | 9.013           | 0.074           | 0.979          | 0.074           | 0.000           | 0.000           | 1.314           | 0.000           | 0.000           | 0.000           | 8.294           | 0.000           |
| 6.857          | 0.087          | 0.295          | 2.795          | 29.923          | 0.043           | 12.984         | 0.043           | 0.000           | 0.000           | 0.741           | 0.000           | 0.000           | 0.000           | 7.993           | 0.000           |
| 4.696          | 0.255          | 0.203          | 3.088          | 63.246          | 0.051           | 4.585          | 0.101           | 0.000           | 0.000           | 1.646           | 0.000           | 0.000           | 0.000           | 7.280           | 0.000           |
| 6.212          | 0.144          | 0.016          | 5.848          | 13.858          | 0.078           | 3.842          | 0.039           | 0.000           | 0.000           | 0.809           | 0.000           | 0.000           | 0.000           | 7.712           | 0.000           |
| 8.651          | 0.499          | 0.013          | 6.535          | 17.250          | 0.041           | 2.405          | 0.124           | 0.048           | 0.000           | 1.056           | 0.000           | 0.000           | 0.000           | 7.128           | 0.000           |
| 4.584          | 0.372          | 0.056          | 3.440          | 23.914          | 0.000           | 30.747         | 0.044           | 0.051           | 0.000           | 1.108           | 0.000           | 0.000           | 0.000           | 8.333           | 0.000           |
| 9.783          | 1.365          | 1.077          | 5.360          | 13.556          | 0.183           | 77.304         | 0.138           | 0.000           | 0.000           | 1.146           | 0.000           | 0.000           | 0.000           | 7.071           | 0.000           |
| 6.885          | 0.304          | 1.083          | 4.006          | 57.160          | 0.000           | 29.453         | 0.000           | 0.000           | 0.000           | 1.370           | 0.000           | 0.000           | 0.000           | 9.439           | 0.000           |
| 6.983          | 0.156          | 0.004          | 5.507          | 19.366          | 0.000           | 0.504          | 0.038           | 0.000           | 0.000           | 0.465           | 0.026           | 0.000           | 0.000           | 8.588           | 0.000           |
| 6.927          | 0.335          | 0.101          | 5.158          | 14.196          | 0.000           | 10.352         | 0.000           | 0.000           | 0.000           | 0.628           | 0.000           | 0.000           | 0.000           | 7.597           | 0.000           |
| 7.072          | 0.714          | 3.087          | 6.448          | 21.799          | 0.000           | 9.978          | 0.131           | 0.000           | 0.000           | 1.376           | 0.000           | 0.007           | 0.000           | 8.143           | 0.000           |
| 6.857          | 0.484          | 0.087          | 6.893          | 23.022          | 0.000           | 2.965          | 0.148           | 0.000           | 0.000           | 0.986           | 0.000           | 0.000           | 0.000           | 9.964           | 0.000           |
| 6.275          | 0.222          | 0.989          | 4.989          | 40.103          | 0.000           | 25.534         | 0.087           | 0.000           | 0.000           | 0.986           | 0.000           | 0.000           | 0.000           | 6.892           | 0.000           |
| 11.719         | 0.450          | 0.097          | 4.874          | 17.609          | 0.087           | 9.719          | 0.043           | 0.000           | 0.000           | 1.295           | 0.000           | 0.000           | 0.000           | 6.299           | 0.000           |
| 6.339          | 0.659          | 0.044          | 4.824          | 26.315          | 0.000           | 9.799          | 0.218           | 0.000           | 0.000           | 0.827           | 0.030           | 0.000           | 0.000           | 7.415           | 0.000           |
| 10.362         | 0.315          | 1.646          | 3.332          | 31.388          | 0.108           | 12.992         | 0.036           | 0.084           | 0.000           | 1.201           | 0.000           | 0.000           | 0.000           | 4.836           | 0.000           |
| 12.236         | 0.527          | 0.338          | 5.253          | 27.852          | 0.151           | 5.473          | 0.038           | 0.000           | 0.000           | 0.705           | 0.000           | 0.000           | 0.000           | 7.077           | 0.000           |
| 4.925          | 0.807          | 1.295          | 2.795          | 16.931          | 0.132           | 89.353         | 0.043           | 0.000           | 0.000           | 0.345           | 0.000           | 0.000           | 0.000           | 8.961           | 0.000           |
| 8.361          | 0.255          | 0.074          | 6.437          | 23.896          | 0.000           | 4.700          | 0.000           | 0.000           | 0.000           | 1.029           | 0.000           | 0.000           | 0.000           | 5.780           | 0.000           |
| 6.683          | 0.960          | 0.099          | 4.730          | 18.365          | 0.000           | 2.443          | 0.089           | 0.000           | 0.000           | 0.736           | 0.000           | 0.000           | 0.000           | 9.491           | 0.000           |
| 7.041          | 0.455          | 0.064          | 5.619          | 14.878          | 0.243           | 22.729         | 0.040           | 0.047           | 0.000           | 1.285           | 0.000           | 0.000           | 0.000           | 8.474           | 0.000           |
| 12.183         | 1.072          | 0.102          | 9.747          | 13.816          | 0.349           | 12.073         | 0.154           | 0.000           | 0.000           | 2.976           | 0.080           | 0.000           | 0.000           | 9.535           | 0.000           |
| 11.230         | 1.206          | 0.295          | 7.790          | 11.429          | 0.039           | 3.575          | 0.000           | 0.000           | 0.000           | 1.498           | 0.000           | 0.000           | 0.000           | 7.736           | 0.000           |
| 8.156          | 0.414          | 1.862          | 4.445          | 33.074          | 0.046           | 25.692         | 0.046           | 0.000           | 0.000           | 1.385           | 0.032           | 0.000           | 0.000           | 11.521          | 0.000           |
| 8.141          | 0.191          | 1.722          | 5.006          | 18.214          | 0.000           | 8.428          | 0.000           | 0.000           | 0.000           | 0.583           | 0.033           | 0.000           | 0.000           | 12.965          | 0.072           |
| 6.173          | 0.509          | 0.198          | 6.535          | 14.035          | 0.095           | 20.885         | 0.141           | 0.000           | 0.000           | 1.313           | 0.000           | 0.000           | 0.000           | 8.125           | 0.000           |
| 9.013          | 0.744          | 0.042          | 5.022          | 15.517          | 0.000           | 16.886         | 0.040           | 0.046           | 0.000           | 0.732           | 0.000           | 0.006           | 0.000           | 10.654          | 0.000           |
| 10.351         | 0.765          | 0.056          | 4.107          | 18.220          | 0.088           | 16.878         | 0.263           | 0.153           | 0.000           | 0.611           | 0.000           | 0.000           | 0.000           | 8.188           | 0.000           |
| 8.159          | 0.067          | 0.046          | 5.949          | 15.984          | 0.076           | 5.779          | 0.113           | 0.000           | 0.000           | 1.132           | 0.000           | 0.000           | 0.000           | 10.742          | 0.000           |
| 11.533         | 1.416          | 0.030          | 4.546          | 17.519          | 0.081           | 2.430          | 0.120           | 0.047           | 0.000           | 0.712           | 0.000           | 0.000           | 0.000           | 9.749           | 0.000           |
| 9.892          | 0.647          | 0.042          | 6.284          | 15.166          | 0.197           | 5.708          | 0.352           | 0.000           | 0.000           | 3.513           | 0.000           | 0.000           | 0.000           | 9.351           | 0.000           |
| 9.271          | 0.969          | 0.073          | 5.392          | 20.868          | 0.043           | 0.437          | 0.086           | 0.000           | 0.000           | 1.087           | 0.000           | 0.007           | 0.000           | 10.256          | 0.000           |
| 9.310          | 0.435          | 0.862          | 5.278          | 30.006          | 0.000           | 8.550          | 0.087           | 0.152           | 0.000           | 0.941           | 0.000           | 0.000           | 0.000           | 9.132           | 0.000           |
| 8.973          | 0.698          | 0.525          | 5.112          | 25.190          | 0.076           | 5.329          | 0.151           | 0.000           | 0.000           | 0.993           | 0.000           | 0.000           | 0.000           | 7.116           | 0.000           |
| 4.381          | 0.054          | 0.013          | 6.391          | 9.329           | 0.036           | 9.209          | 0.036           | 0.000           | 0.000           | 1.126           | 0.000           | 0.000           | 0.000           | 7.693           | 0.000           |
| 7.432          | 1.021          | 1.180          | 4.750          | 32.658          | 0.036           | 113.731        | 0.036           | 0.042           | 0.000           | 0.828           | 0.000           | 0.000           | 0.000           | 8.584           | 0.000           |
| 5.267          | 0.467          | 0.023          | 5.460          | 14.949          | 0.000           | 9.613          | 0.039           | 0.000           | 0.000           | 0.896           | 0.000           | 0.000           | 0.000           | 8.122           | 0.000           |
| 8.585          | 0.662          | 0.128          | 3.941          | 30.591          | 0.000           | 1.895          | 0.000           | 0.000           | 0.000           | 1.190           | 0.000           | 0.000           | 0.000           | 11.002          | 0.000           |
| 8.657          | 0.434          | 0.039          | 4.603          | 12.553          | 0.035           | 0.430          | 0.174           | 0.000           | 0.000           | 0.624           | 0.000           | 0.000           | 0.000           | 10.607          | 0.000           |
| 8.159          | 0.467          | 0.046          | 5.949          | 15.984          | 0.076           | 5.779          | 0.113           | 0.000           | 0.000           | 1.132           | 0.000           | 0.000           | 0.000           | 9.249           | 0.000           |
| 8.266          | 0.571          | 0.071          | 3.772          | 16.151          | 0.000           | 0.742          | 0.167           | 0.194           | 0.000           | 1.547           | 0.000           | 0.000           | 0.000           | 11.420          | 0.000           |
| 5.771          | 0.459          | 0.020          | 5.447          | 10.036          | 0.042           | 8.266          | 0.124           | 0.000           | 0.000           | 1.145           | 0.000           | 0.000           | 0.000           | 11.848          | 0.000           |
| 11.916         | 0.359          | 0.454          | 4.450          | 30.770          | 0.000           | 5.343          | 0.000           | 0.000           | 0.286           | 1.280           | 0.000           | 0.000           | 0.000           | 12.450          | 0.000           |
| 7.012          | 0.165          | 0.072          | 6.535          | 15.506          | 0.000           | 1.144          | 0.039           | 0.045           | 0.000           | 1.224           | 0.000           | 0.000           | 0.000           | 8.886           | 0.000           |
| 7.598          | 1.760          | 0.343          | 4.910          | 14.276          | 0.146           | 1.794          | 0.036           | 0.042           | 0.000           | 1.428           | 0.000           | 0.000           | 0.000           | 4.842           | 0.000           |
| 8.616          | 0.486          | 1.862          | 4.445          | 33.074          | 0.046           | 25.692         | 0.046           | 0.000           | 0.000           | 1.385           | 0.032           | 0.000           | 0.000           | 11.521          | 0.000           |
| 8.024          | 0.235          | 0.499          | 3.073          | 39.172          | 0.000           | 3.702          | 0.000           | 0.000           | 0.000           | 1.007           | 0.000           | 0.000           | 0.000           | 9.809           | 0.000           |
| 9.770          | 0.720          | 3.368          | 4.177          | 15.937          | 0.070           | 14.749         | 0.035           | 0.040           | 0.253           | 0.119           | 1.035           | 0.024           | 0.000           | 8.730           | 0.000           |
| 8.362          | 0.375          | 0.217          | 8.950          | 14.079          | 0.112           | 0.854          | 0.074           | 0.000           | 0.000           | 1.199           | 0.000           | 0.000           | 0.000           | 7.975           | 0.000           |
| 9.082          | 0.597          | 0.315          | 5.093          | 25.195          | 0.208           | 12.366         | 0.083           | 0.000           | 0.000           | 1.111           | 0.000           | 0.000           | 0.000           | 11.634          | 0.000           |
| 10.431         | 0.245          | 0.046          | 4.270          | 25.568          | 0.076           | 4.270          | 0.076           | 0.000           | 0.000           | 0.784           | 0.000           | 0.000           | 0.000           | 9.742           | 0.000           |
| 6.714          | 0.456          | 0.241          | 3.370          | 31.904          | 0.000           | 11.743         | 0.000           | 0.000           | 0.000           | 0.309           | 0.000           | 0.000           | 0.000           | 7.450           | 0.000           |
| 6.560          | 0.628          | 0.026          | 2.272          | 23.698          | 0.049           | 8.491          | 0.000           | 0.000           | 0.000           | 0.510           | 0.000           | 0.000           | 0.000           | 10.643          | 0.000           |
| 9.152          | 1.011          | 0.034          | 4.489          | 19.299          | 0.130           | 0.338          | 0.000           | 0.000           | 0.000           | 1.018           | 0.000           | 0.000           | 0.000           | 6.821           | 0.000           |
| 6.347          | 0.350          | 0.030          | 3.201          | 15.874          | 0.000           | 1.339          | 0.000           | 0.059           | 0.000           | 0.917           | 0.000           | 0.000           | 0.000           | 10.849          | 0.000           |
| 5.079          | 0.345          | 0.030          | 4.097          | 23.139          | 0.037           | 16.868         | 0.037           | 0.000           | 0.000           | 0.984           | 0.000           | 0.000           | 0.000           | 9.265           | 0.000           |
| 4.379          | 0.054          | 0.013          | 6.391          | 9.329           | 0.036           | 9.209          | 0.036           | 0.000           | 0.000           | 1.126           | 0.000           | 0.000           | 0.000           | 7.693           | 0.000           |
| 4.707          | 0.248          | 0.020          |                |                 |                 |                |                 |                 |                 |                 |                 |                 |                 |                 |                 |

| ENGG0000121263 | ENGG0000117697 | ENGG000017225 | ENGG0000121138 | ENGG0000278628 | ENGG0000073898 | ENGG0000248722 | ENGG0000233369 | ENGG0000103353 | ENGG0000189275 | ENGG0000169852 | ENGG0000232122 | ENGG0000199473 | ENGG0000212446 | ENGG0000236039 | ENGG0000160888 |
|----------------|----------------|---------------|----------------|----------------|----------------|----------------|----------------|----------------|----------------|----------------|----------------|----------------|----------------|----------------|----------------|
| 0.000          | 14.731         | 0.112         | 0.000          | 0.140          | 0.125          | 0.000          | 6.145          | 10.915         | 0.073          | 1.135          | 0.142          | 0.000          | 0.000          | 0.000          | 14.510         |
| 0.000          | 9.279          | 0.071         | 0.000          | 0.953          | 0.121          | 0.000          | 2.612          | 6.055          | 0.037          | 0.848          | 0.096          | 0.000          | 0.000          | 0.000          | 34.297         |
| 0.223          | 16.152         | 0.032         | 0.000          | 2.619          | 0.135          | 0.000          | 4.271          | 11.281         | 0.006          | 0.260          | 0.077          | 0.000          | 0.000          | 0.000          | 53.440         |
| 0.000          | 15.134         | 0.036         | 0.000          | 0.343          | 0.382          | 0.000          | 6.632          | 8.860          | 0.019          | 0.358          | 0.061          | 0.000          | 0.000          | 0.000          | 106.235        |
| 0.065          | 7.722          | 0.000         | 0.000          | 1.374          | 0.000          | 0.000          | 4.761          | 6.722          | 0.001          | 0.728          | 0.001          | 0.000          | 0.000          | 0.000          | 10.272         |
| 0.000          | 12.419         | 0.068         | 0.000          | 0.980          | 0.282          | 0.000          | 10.905         | 12.277         | 0.000          | 0.728          | 0.458          | 0.000          | 0.000          | 0.000          | 17.158         |
| 0.750          | 9.990          | 0.272         | 0.000          | 1.647          | 0.121          | 0.000          | 3.230          | 11.116         | 0.000          | 2.978          | 0.224          | 0.000          | 0.000          | 0.000          | 26.040         |
| 0.000          | 15.270         | 0.044         | 0.000          | 0.377          | 0.016          | 0.000          | 5.127          | 6.181          | 0.243          | 5.196          | 0.018          | 0.000          | 0.000          | 0.043          | 12.467         |
| 0.000          | 21.855         | 0.029         | 0.000          | 0.540          | 0.037          | 0.000          | 5.961          | 8.372          | 0.053          | 1.181          | 0.032          | 0.000          | 0.000          | 0.000          | 27.985         |
| 0.000          | 17.425         | 0.253         | 0.000          | 1.027          | 0.000          | 0.000          | 2.133          | 4.413          | 0.000          | 0.945          | 0.153          | 0.000          | 0.698          | 0.000          | 20.334         |
| 1.093          | 7.719          | 0.135         | 0.000          | 3.117          | 0.013          | 0.000          | 4.441          | 3.975          | 0.000          | 0.883          | 0.090          | 0.000          | 0.000          | 0.000          | 8.176          |
| 0.000          | 12.073         | 0.027         | 0.000          | 0.768          | 0.137          | 0.000          | 6.461          | 10.686         | 0.483          | 0.787          | 0.117          | 0.000          | 0.000          | 0.000          | 27.529         |
| 0.000          | 14.864         | 0.050         | 0.000          | 0.523          | 0.127          | 0.000          | 7.754          | 8.803          | 0.000          | 0.780          | 0.080          | 0.000          | 0.000          | 0.000          | 14.637         |
| 0.218          | 10.647         | 0.041         | 0.159          | 0.519          | 0.106          | 0.000          | 10.371         | 9.415          | 0.049          | 0.696          | 0.233          | 0.000          | 0.000          | 0.000          | 26.267         |
| 0.000          | 16.021         | 0.115         | 0.000          | 0.859          | 0.177          | 0.000          | 6.023          | 6.049          | 0.169          | 1.945          | 0.034          | 0.000          | 0.000          | 0.000          | 14.791         |
| 0.219          | 8.602          | 0.067         | 0.000          | 1.336          | 0.040          | 0.000          | 3.103          | 6.136          | 0.000          | 1.138          | 0.106          | 0.000          | 0.000          | 0.000          | 53.454         |
| 0.000          | 14.823         | 0.018         | 0.000          | 2.531          | 0.395          | 0.000          | 10.408         | 10.621         | 0.000          | 2.246          | 0.070          | 0.000          | 0.198          | 0.000          | 24.755         |
| 0.000          | 40.378         | 0.057         | 0.000          | 2.682          | 0.054          | 0.000          | 4.206          | 6.030          | 0.052          | 0.417          | 0.031          | 0.000          | 0.000          | 0.000          | 8.140          |
| 0.000          | 13.435         | 0.081         | 0.000          | 2.613          | 0.041          | 0.000          | 3.407          | 5.687          | 0.006          | 0.647          | 0.056          | 0.000          | 0.000          | 0.000          | 20.201         |
| 0.000          | 9.455          | 0.029         | 0.000          | 2.165          | 0.206          | 0.000          | 5.149          | 9.872          | 0.000          | 0.190          | 0.117          | 0.000          | 0.000          | 0.000          | 14.807         |
| 0.519          | 34.175         | 0.088         | 0.000          | 1.409          | 0.126          | 0.000          | 2.246          | 4.531          | 0.058          | 1.767          | 0.000          | 0.000          | 0.000          | 0.000          | 10.067         |
| 0.000          | 7.871          | 0.044         | 0.588          | 0.364          | 0.211          | 0.000          | 11.538         | 12.607         | 0.067          | 4.203          | 0.194          | 0.000          | 0.211          | 0.043          | 9.996          |
| 0.282          | 21.981         | 0.050         | 0.000          | 3.096          | 0.095          | 0.000          | 7.356          | 9.445          | 0.046          | 3.084          | 0.081          | 0.000          | 0.000          | 0.000          | 18.038         |
| 0.000          | 8.739          | 0.164         | 0.163          | 0.969          | 0.135          | 0.000          | 3.056          | 12.040         | 0.000          | 0.156          | 0.015          | 0.000          | 0.000          | 0.000          | 11.290         |
| 0.248          | 13.435         | 0.065         | 0.000          | 0.590          | 0.045          | 0.000          | 6.355          | 6.969          | 0.000          | 0.700          | 0.068          | 0.000          | 0.000          | 0.000          | 37.659         |
| 0.516          | 11.881         | 0.122         | 0.000          | 0.754          | 0.141          | 0.000          | 7.449          | 12.446         | 0.006          | 0.116          | 0.258          | 0.000          | 0.000          | 0.000          | 52.175         |
| 0.000          | 10.396         | 0.000         | 0.000          | 1.903          | 0.053          | 0.000          | 4.572          | 4.896          | 0.008          | 0.358          | 0.131          | 0.000          | 0.000          | 0.000          | 16.225         |
| 0.000          | 12.844         | 0.584         | 0.000          | 0.158          | 0.051          | 0.000          | 8.051          | 8.967          | 0.077          | 1.477          | 0.053          | 0.000          | 0.000          | 0.000          | 17.821         |
| 0.000          | 11.957         | 0.079         | 0.000          | 0.574          | 0.046          | 0.000          | 4.415          | 6.152          | 0.006          | 0.104          | 0.132          | 0.000          | 0.201          | 0.000          | 26.500         |
| 0.257          | 15.293         | 0.128         | 0.188          | 0.245          | 0.078          | 0.000          | 7.005          | 6.024          | 0.070          | 0.359          | 0.133          | 0.000          | 0.000          | 0.000          | 28.264         |
| 0.000          | 17.754         | 0.050         | 0.000          | 1.265          | 0.051          | 0.000          | 7.743          | 9.209          | 0.005          | 0.355          | 0.066          | 0.000          | 0.000          | 0.000          | 32.705         |
| 0.000          | 9.214          | 0.021         | 0.162          | 0.271          | 0.081          | 0.000          | 6.209          | 9.324          | 0.011          | 0.155          | 0.161          | 0.000          | 0.000          | 0.000          | 39.758         |
| 0.000          | 14.452         | 0.018         | 0.000          | 0.145          | 0.026          | 0.000          | 3.353          | 4.613          | 0.237          | 1.244          | 0.027          | 0.000          | 0.000          | 0.000          | 24.755         |
| 0.000          | 11.068         | 0.206         | 0.000          | 1.676          | 0.075          | 0.000          | 3.296          | 8.280          | 0.006          | 0.200          | 0.051          | 0.000          | 0.000          | 0.000          | 26.402         |
| 0.000          | 12.162         | 0.062         | 0.000          | 0.678          | 0.191          | 0.000          | 7.242          | 13.738         | 0.000          | 0.170          | 0.109          | 0.000          | 0.000          | 0.000          | 13.681         |
| 0.000          | 13.115         | 0.068         | 0.000          | 0.453          | 0.101          | 0.000          | 11.559         | 5.624          | 0.118          | 1.626          | 0.107          | 0.000          | 0.000          | 0.000          | 23.708         |
| 0.227          | 10.005         | 0.065         | 0.166          | 1.621          | 0.151          | 0.000          | 4.154          | 12.467         | 0.643          | 0.791          | 0.321          | 0.000          | 0.000          | 0.000          | 17.439         |
| 0.000          | 16.324         | 0.113         | 0.186          | 0.740          | 0.165          | 0.000          | 5.016          | 8.419          | 0.000          | 0.915          | 0.251          | 0.000          | 0.000          | 0.000          | 31.809         |
| 0.000          | 20.430         | 0.071         | 0.168          | 1.104          | 0.082          | 0.000          | 7.421          | 11.862         | 0.241          | 1.862          | 0.121          | 0.000          | 0.000          | 0.000          | 16.622         |
| 0.000          | 16.527         | 0.046         | 0.000          | 1.348          | 0.085          | 0.000          | 5.055          | 10.960         | 0.056          | 1.518          | 0.241          | 0.000          | 0.000          | 0.000          | 15.834         |
| 0.000          | 11.979         | 0.066         | 0.203          | 0.870          | 0.067          | 0.000          | 4.245          | 11.993         | 0.090          | 1.482          | 0.259          | 0.000          | 0.000          | 0.000          | 15.046         |
| 0.000          | 12.937         | 0.123         | 0.000          | 0.400          | 0.114          | 0.000          | 5.681          | 11.825         | 0.111          | 0.772          | 0.081          | 0.000          | 0.000          | 0.000          | 19.404         |
| 0.000          | 16.528         | 0.061         | 0.000          | 0.985          | 0.078          | 0.000          | 5.588          | 10.808         | 0.051          | 0.596          | 0.054          | 0.000          | 0.000          | 0.000          | 14.617         |
| 0.222          | 14.997         | 0.007         | 0.000          | 0.526          | 0.094          | 0.000          | 6.738          | 10.635         | 0.061          | 0.593          | 0.245          | 0.000          | 0.000          | 0.000          | 15.597         |
| 0.000          | 15.321         | 0.062         | 0.173          | 0.756          | 0.172          | 0.000          | 7.427          | 10.539         | 0.006          | 0.202          | 0.090          | 0.000          | 0.000          | 0.000          | 27.198         |
| 0.000          | 19.744         | 0.164         | 0.000          | 1.506          | 0.084          | 0.000          | 2.689          | 8.541          | 0.023          | 0.491          | 0.215          | 0.000          | 0.000          | 0.000          | 32.446         |
| 0.000          | 13.577         | 0.114         | 0.000          | 1.987          | 0.123          | 0.000          | 3.109          | 11.121         | 0.000          | 3.063          | 0.333          | 0.000          | 0.000          | 0.000          | 36.315         |
| 0.000          | 13.280         | 0.030         | 0.000          | 0.577          | 0.140          | 0.000          | 7.857          | 9.985          | 0.019          | 1.046          | 0.222          | 0.000          | 0.000          | 0.000          | 12.912         |
| 0.000          | 11.273         | 0.021         | 0.000          | 1.996          | 0.122          | 0.000          | 10.518         | 14.305         | 0.006          | 0.091          | 0.077          | 0.000          | 0.000          | 0.000          | 20.769         |
| 0.000          | 15.813         | 0.065         | 0.000          | 2.976          | 0.051          | 0.000          | 4.186          | 6.170          | 0.005          | 0.051          | 0.005          | 0.000          | 0.000          | 0.000          | 22.688         |
| 0.000          | 14.327         | 0.020         | 0.000          | 2.289          | 0.090          | 0.000          | 10.422         | 12.704         | 0.432          | 4.954          | 0.095          | 0.000          | 0.000          | 0.000          | 17.526         |
| 0.228          | 12.866         | 0.135         | 0.167          | 0.697          | 0.110          | 0.000          | 4.420          | 7.876          | 0.028          | 0.586          | 0.063          | 0.000          | 0.000          | 0.000          | 42.849         |
| 0.000          | 24.599         | 0.291         | 0.000          | 2.538          | 0.197          | 0.000          | 13.069         | 12.115         | 0.000          | 0.203          | 0.096          | 0.000          | 0.000          | 0.000          | 13.793         |
| 0.000          | 14.264         | 0.019         | 0.150          | 0.627          | 0.137          | 0.000          | 5.195          | 8.416          | 0.000          | 0.068          | 0.064          | 0.000          | 0.000          | 0.000          | 14.350         |
| 0.000          | 18.823         | 0.007         | 0.000          | 2.540          | 0.107          | 0.000          | 6.527          | 10.256         | 0.061          | 0.593          | 0.245          | 0.000          | 0.000          | 0.000          | 24.464         |
| 0.000          | 20.147         | 0.063         | 0.000          | 1.270          | 0.119          | 0.000          | 6.597          | 8.939          | 0.000          | 0.082          | 0.204          | 0.000          | 0.000          | 0.000          | 7.427          |
| 0.000          | 17.323         | 0.012         | 0.000          | 0.648          | 0.148          | 0.035          | 4.361          | 4.866          | 0.012          | 0.262          | 0.160          | 0.000          | 0.000          | 0.000          | 17.457         |
| 0.000          | 15.429         | 0.027         | 0.000          | 6.262          | 0.224          | 0.000          | 6.084          | 13.687         | 0.000          | 0.416          | 0.128          | 0.000          | 0.000          | 0.000          | 16.678         |
| 0.000          | 12.604         | 0.103         | 0.188          | 2.963          | 0.195          | 0.000          | 5.949          | 10.967         | 0.000          | 0.569          | 0.150          | 0.000          | 0.000          | 0.000          | 11.680         |
| 0.000          | 14.350         | 0.020         | 0.000          | 1.469          | 0.143          | 0.000          | 12.517         | 10.098         | 0.000          | 0.203          | 0.052          | 0.000          | 0.000          | 0.000          | 42.438         |
| 0.000          | 14.160         | 0.035         | 0.210          | 0.228          | 0.082          | 0.000          | 8.421          | 8.961          | 0.202          | 0.861          | 0.202          | 0.000          | 0.000          | 0.000          | 25.942         |
| 0.000          | 20.950         | 0.019         | 0.000          | 0.934          | 0.143          | 0.000          | 9.785          | 11.158         | 0.000          | 0.450          | 0.054          | 0.000          | 0.000          | 0.000          | 25.944         |
| 0.000          | 10.919         | 0.073         | 0.000          | 0.514          | 0.198          | 0.000          | 11.183         | 14.299         | 0.005          | 3.135          | 0.190          | 0.000          | 0.000          | 0.000          | 13.389         |
| 0.000          | 10.173         | 0.073         | 0.000          | 8.266          | 0.053          | 0.000          | 4.360          | 8.651          | 0.000          | 0.758          | 0.182          | 0.000          | 0.000          | 0.000          | 45.939         |
| 0.000          | 20.454         | 0.088         | 0.000          | 1.876          | 0.044          | 0.000          | 11.505         | 14.714         | 0.012          | 0.285          | 0.093          | 0.000          | 0.000          | 0.000          | 16.688         |
| 0.066          | 16.965         | 0.007         | 0.000          | 0.526          | 0.094          | 0.000          | 6.156          | 8.270          | 0.016          | 0.196          | 0.066          | 0.000          | 0.000          | 0.000          | 15.597         |
| 0.000          | 23.006         | 0.315         | 0.000          | 0.527          | 0.052          | 0.000          | 7.720          | 8.728          | 0.021          | 1.485          | 0.000          | 0.000          | 0.000          | 0.000          | 17.940         |
| 0.000          | 24.886         | 0.014         | 0.210          | 1.502          | 0.000          | 0.000          | 4.218          | 5.713          | 0.021          | 0.096          | 0.020          | 0.000          | 0.000          | 0.000          | 15.934         |
| 0.382          | 15.790         | 0.018         | 0.000          | 1.608          | 0.069          | 0.000          | 6.168          | 10.293         | 0.019          | 0.076          | 0.079          | 0.000          | 0.000          | 0.000          | 8.165          |
| 0.000          | 26.562         | 0.029         | 0.000          | 0.717          | 0.055          | 0.000          | 3.447          | 7.528          | 0.000          | 0.317          | 0.052          | 0.000          | 0.000          | 0.000          | 7.942          |
| 0.000          | 15.625         | 0.005         | 0.000          | 1.553          | 0.120          | 0.000          | 6.769          | 12.456         | 0.016          | 0.204          | 0.038          | 0.000          | 0.000          | 0.000          | 15.064         |
| 0.000          | 24.344         | 0.071         | 0.168          | 1.024          | 0.105          | 0.000          | 4.444          | 6.209          | 0.000          | 1.869          | 0.249          | 0.000          | 0.000          | 0.000          | 17.04          |

| ENSG00000164625 | ENSG00000228793 | ENSG00000256899 | ENSG00000227979 | ENSG00000179902 | ENSG00000233489 | ENSG00000230585 | ENSG00000101460 | ENSG00000179919 | ENSG00000217889 | ENSG00000224470 | ENSG00000224297 | ENSG00000222567 | ENSG00000275409 | ENSG00000172809 | ENSG00000106278 |
|-----------------|-----------------|-----------------|-----------------|-----------------|-----------------|-----------------|-----------------|-----------------|-----------------|-----------------|-----------------|-----------------|-----------------|-----------------|-----------------|
| 9475            | 0.125           | 0.000           | 0.000           | 6.192           | 0.000           | 0.033           | 23.808          | 0.000           | 0.112           | 0.000           | 0.000           | 0.850           | 59.908          | 142.235         |                 |
| 0.000           | 0.320           | 0.000           | 0.000           | 0.443           | 0.000           | 0.018           | 23.968          | 0.000           | 0.024           | 0.022           | 0.000           | 0.100           | 0.152           | 106.047         | 8.203           |
| 0.118           | 0.404           | 0.000           | 0.000           | 1.790           | 0.000           | 0.025           | 4.794           | 0.000           | 0.021           | 0.000           | 0.000           | 0.000           | 0.305           | 145.379         | 118.122         |
| 0.089           | 1.022           | 0.000           | 0.000           | 2.611           | 0.000           | 0.028           | 17.545          | 0.000           | 0.120           | 0.000           | 0.000           | 0.000           | 0.499           | 87.083          | 172.467         |
| 1.728           | 0.372           | 0.000           | 0.000           | 12.594          | 0.000           | 0.021           | 10.154          | 0.000           | 0.161           | 0.000           | 0.000           | 0.000           | 0.251           | 103.151         | 40.087          |
| 0.156           | 0.473           | 0.000           | 0.166           | 0.951           | 0.000           | 0.016           | 2.032           | 0.000           | 0.127           | 0.039           | 0.000           | 0.089           | 0.472           | 68.598          | 162.763         |
| 0.747           | 0.080           | 0.000           | 0.000           | 0.478           | 0.000           | 0.028           | 22.420          | 0.000           | 0.285           | 0.022           | 0.000           | 0.100           | 0.238           | 55.018          | 4.725           |
| 0.139           | 1.380           | 0.000           | 0.000           | 1.835           | 0.000           | 0.000           | 38.290          | 0.000           | 0.201           | 0.000           | 0.000           | 0.000           | 0.683           | 89.649          | 55.740          |
| 0.107           | 1.301           | 0.000           | 0.000           | 3.617           | 0.028           | 0.045           | 32.707          | 0.000           | 0.203           | 0.000           | 0.000           | 0.000           | 0.603           | 110.899         | 158.521         |
| 0.625           | 1.231           | 0.000           | 0.000           | 0.363           | 0.000           | 0.000           | 22.688          | 0.000           | 0.254           | 0.000           | 0.000           | 0.000           | 0.076           | 108.247         | 40.137          |
| 0.115           | 0.372           | 0.000           | 0.000           | 1.531           | 0.000           | 0.040           | 23.152          | 0.000           | 0.270           | 0.000           | 0.000           | 0.000           | 0.531           | 71.782          | 159.403         |
| 0.119           | 0.313           | 0.000           | 0.000           | 0.585           | 0.020           | 0.017           | 32.346          | 0.000           | 0.043           | 0.020           | 0.000           | 0.000           | 0.515           | 51.354          | 415.942         |
| 0.123           | 0.149           | 0.000           | 0.000           | 2.572           | 0.000           | 0.086           | 28.079          | 0.000           | 0.177           | 0.020           | 0.038           | 0.000           | 0.213           | 42.870          | 131.012         |
| 0.038           | 0.930           | 0.000           | 0.000           | 2.005           | 0.000           | 0.008           | 43.808          | 0.000           | 0.228           | 0.000           | 0.000           | 0.000           | 0.597           | 39.648          | 156.997         |
| 0.171           | 0.725           | 0.000           | 0.000           | 7.941           | 0.000           | 0.000           | 44.434          | 0.000           | 0.092           | 0.000           | 0.000           | 0.000           | 0.148           | 77.456          | 77.596          |
| 0.230           | 1.499           | 0.000           | 0.000           | 1.323           | 0.000           | 0.032           | 16.191          | 0.000           | 0.208           | 0.115           | 0.000           | 0.000           | 0.452           | 45.135          | 52.419          |
| 0.044           | 0.955           | 0.000           | 0.094           | 1.224           | 0.000           | 0.000           | 20.473          | 0.000           | 0.267           | 0.000           | 0.000           | 0.000           | 0.383           | 14.413          | 289.521         |
| 0.368           | 1.147           | 0.000           | 0.000           | 5.718           | 0.000           | 0.000           | 13.635          | 0.000           | 0.057           | 0.028           | 0.000           | 0.000           | 0.273           | 257.920         | 43.904          |
| 0.080           | 3.127           | 0.000           | 0.000           | 1.053           | 0.000           | 0.000           | 34.524          | 0.000           | 0.195           | 0.000           | 0.000           | 0.000           | 0.138           | 64.433          | 143.990         |
| 0.000           | 0.207           | 0.000           | 0.000           | 2.288           | 0.000           | 0.000           | 22.285          | 0.000           | 0.162           | 0.000           | 0.000           | 0.000           | 0.555           | 42.276          | 147.961         |
| 0.091           | 3.259           | 0.000           | 0.000           | 5.012           | 0.000           | 0.000           | 35.054          | 0.000           | 0.222           | 0.000           | 0.042           | 0.000           | 0.355           | 158.298         | 108.416         |
| 0.000           | 1.256           | 0.000           | 0.000           | 1.995           | 0.000           | 0.039           | 19.921          | 0.000           | 0.178           | 0.023           | 0.000           | 0.000           | 0.407           | 49.450          | 166.650         |
| 0.230           | 0.698           | 0.000           | 0.000           | 2.442           | 0.000           | 0.019           | 24.087          | 0.000           | 0.340           | 0.000           | 0.000           | 0.105           | 0.270           | 124.393         | 122.808         |
| 0.000           | 0.095           | 0.000           | 0.000           | 0.349           | 0.000           | 0.016           | 14.997          | 0.000           | 0.148           | 0.000           | 0.000           | 0.000           | 0.203           | 61.935          | 110.097         |
| 0.087           | 0.291           | 0.000           | 0.000           | 0.709           | 0.000           | 0.000           | 38.174          | 0.000           | 0.000           | 0.022           | 0.000           | 0.000           | 0.829           | 68.241          | 92.450          |
| 0.000           | 0.495           | 0.000           | 0.000           | 2.809           | 0.000           | 0.028           | 22.837          | 0.000           | 0.294           | 0.000           | 0.042           | 0.000           | 0.470           | 50.149          | 196.373         |
| 0.056           | 0.000           | 0.000           | 0.000           | 21.860          | 0.006           | 0.021           | 29.738          | 0.000           | 0.196           | 0.000           | 0.000           | 0.000           | 0.576           | 68.046          | 80.572          |
| 0.271           | 0.876           | 0.000           | 0.000           | 1.154           | 0.000           | 0.031           | 32.271          | 0.000           | 0.057           | 0.000           | 0.000           | 0.388           | 0.200           | 68.454          | 164.555         |
| 0.045           | 0.055           | 0.000           | 0.000           | 7.521           | 0.000           | 0.019           | 49.131          | 0.000           | 0.584           | 0.045           | 0.000           | 0.000           | 1.672           | 58.341          | 111.627         |
| 0.000           | 1.151           | 0.000           | 0.000           | 2.294           | 0.000           | 0.019           | 22.251          | 0.000           | 0.171           | 0.000           | 0.000           | 0.000           | 0.274           | 156.851         | 204.974         |
| 0.000           | 0.564           | 0.000           | 0.000           | 3.529           | 0.000           | 0.008           | 69.095          | 0.000           | 0.141           | 0.000           | 0.000           | 0.000           | 0.386           | 94.806          | 231.932         |
| 0.000           | 0.260           | 0.000           | 0.000           | 0.860           | 0.020           | 0.000           | 53.543          | 0.000           | 0.358           | 0.000           | 0.000           | 0.000           | 1.315           | 65.466          | 187.279         |
| 0.000           | 0.955           | 0.000           | 0.000           | 7.822           | 0.000           | 0.019           | 80.956          | 0.000           | 0.019           | 0.000           | 0.000           | 0.000           | 0.373           | 14.237          | 71.237          |
| 0.000           | 0.238           | 0.000           | 0.000           | 7.800           | 0.000           | 0.018           | 34.986          | 0.000           | 0.260           | 0.000           | 0.040           | 0.000           | 0.945           | 73.358          | 71.558          |
| 0.000           | 0.615           | 0.000           | 0.000           | 3.896           | 0.000           | 0.019           | 23.577          | 0.000           | 0.100           | 0.000           | 0.000           | 0.000           | 0.798           | 49.048          | 281.754         |
| 0.000           | 2.889           | 0.000           | 0.000           | 5.182           | 0.000           | 0.026           | 40.279          | 0.000           | 0.204           | 0.042           | 0.000           | 0.000           | 0.651           | 62.160          | 170.101         |
| 0.120           | 0.073           | 0.000           | 0.000           | 3.263           | 0.041           | 0.050           | 15.067          | 0.000           | 0.059           | 0.000           | 0.000           | 0.000           | 0.622           | 31.739          | 159.087         |
| 0.080           | 1.305           | 0.000           | 0.000           | 3.027           | 0.000           | 0.017           | 28.135          | 0.020           | 0.324           | 0.040           | 0.000           | 0.000           | 0.931           | 54.214          | 78.308          |
| 0.143           | 1.154           | 0.000           | 0.000           | 3.740           | 0.000           | 0.040           | 27.882          | 0.024           | 0.154           | 0.040           | 0.000           | 0.000           | 0.247           | 83.457          | 103.542         |
| 0.098           | 1.222           | 0.000           | 0.000           | 1.237           | 0.000           | 0.010           | 16.745          | 0.000           | 0.585           | 0.000           | 0.000           | 0.000           | 0.956           | 66.642          | 254.283         |
| 0.147           | 0.267           | 0.000           | 0.000           | 7.254           | 0.000           | 0.031           | 25.729          | 0.000           | 0.397           | 0.000           | 0.000           | 0.000           | 0.465           | 47.621          | 243.173         |
| 0.041           | 0.251           | 0.000           | 0.000           | 1.361           | 0.000           | 0.043           | 30.150          | 0.000           | 0.134           | 0.000           | 0.038           | 0.000           | 0.393           | 56.281          | 219.609         |
| 0.091           | 0.193           | 0.000           | 0.000           | 0.846           | 0.000           | 0.019           | 29.263          | 0.000           | 0.320           | 0.000           | 0.000           | 0.000           | 0.315           | 44.887          | 295.058         |
| 0.000           | 0.116           | 0.000           | 0.000           | 2.946           | 0.000           | 0.025           | 16.521          | 0.000           | 0.169           | 0.000           | 0.000           | 0.000           | 0.338           | 49.074          | 379.260         |
| 0.083           | 0.454           | 0.000           | 0.000           | 1.950           | 0.000           | 0.078           | 20.869          | 0.000           | 0.180           | 0.021           | 0.038           | 0.000           | 0.900           | 54.523          | 367.175         |
| 0.081           | 0.344           | 0.068           | 0.000           | 5.154           | 0.000           | 0.034           | 16.213          | 0.000           | 0.483           | 0.000           | 0.000           | 0.000           | 0.562           | 58.464          | 137.806         |
| 0.179           | 0.515           | 0.000           | 0.000           | 0.415           | 0.000           | 0.019           | 11.947          | 0.000           | 0.363           | 0.000           | 0.000           | 0.000           | 0.155           | 151.180         | 2.810           |
| 0.136           | 0.411           | 0.000           | 0.000           | 1.383           | 0.000           | 0.057           | 8.224           | 0.000           | 0.196           | 0.000           | 0.000           | 0.000           | 0.587           | 80.316          | 159.599         |
| 0.000           | 0.428           | 0.000           | 0.000           | 1.898           | 0.000           | 0.033           | 35.891          | 0.000           | 0.042           | 0.000           | 0.000           | 0.000           | 0.339           | 69.862          | 259.199         |
| 0.148           | 0.963           | 0.000           | 0.000           | 0.574           | 0.000           | 0.031           | 26.866          | 0.000           | 0.031           | 0.000           | 0.000           | 0.000           | 0.098           | 70.916          | 70.350          |
| 0.224           | 3.499           | 0.000           | 0.000           | 2.005           | 0.000           | 0.031           | 63.588          | 0.000           | 0.242           | 0.000           | 0.000           | 0.000           | 0.515           | 91.003          | 65.616          |
| 0.040           | 0.170           | 0.000           | 0.000           | 0.729           | 0.000           | 0.034           | 17.932          | 0.000           | 0.043           | 0.020           | 0.000           | 0.000           | 0.190           | 65.800          | 198.201         |
| 0.041           | 0.272           | 0.000           | 0.000           | 7.768           | 0.021           | 0.018           | 22.199          | 0.000           | 0.022           | 0.000           | 0.000           | 0.000           | 0.141           | 89.580          | 174.321         |
| 0.000           | 0.764           | 0.000           | 0.000           | 1.312           | 0.000           | 0.007           | 32.824          | 0.000           | 0.039           | 0.018           | 0.000           | 0.000           | 0.249           | 50.273          | 349.657         |
| 0.199           | 0.199           | 0.000           | 0.000           | 2.159           | 0.000           | 0.042           | 17.111          | 0.000           | 0.242           | 0.000           | 0.000           | 0.000           | 0.344           | 141.508         | 142.908         |
| 0.000           | 0.524           | 0.000           | 0.000           | 3.012           | 0.000           | 0.000           | 10.979          | 0.000           | 0.374           | 0.000           | 0.000           | 0.000           | 0.299           | 124.056         | 159.362         |
| 0.043           | 0.469           | 0.000           | 0.000           | 0.849           | 0.000           | 0.000           | 25.573          | 0.000           | 0.163           | 0.000           | 0.000           | 0.000           | 0.409           | 92.835          | 302.328         |
| 0.081           | 0.148           | 0.000           | 0.000           | 2.327           | 0.000           | 0.017           | 21.431          | 0.000           | 0.154           | 0.000           | 0.000           | 0.000           | 0.925           | 76.473          | 177.755         |
| 0.081           | 2.494           | 0.000           | 0.000           | 8.810           | 0.000           | 0.059           | 16.466          | 0.000           | 0.087           | 0.020           | 0.000           | 0.000           | 0.523           | 54.597          | 154.737         |
| 0.038           | 0.274           | 0.000           | 0.000           | 8.860           | 0.000           | 0.016           | 29.851          | 0.000           | 0.061           | 0.038           | 0.000           | 0.000           | 0.423           | 53.244          | 136.170         |
| 0.000           | 0.132           | 0.000           | 0.000           | 2.442           | 0.000           | 0.040           | 27.604          | 0.000           | 0.073           | 0.000           | 0.000           | 0.000           | 0.247           | 83.457          | 103.542         |
| 0.000           | 0.480           | 0.000           | 0.000           | 1.790           | 0.000           | 0.014           | 26.559          | 0.000           | 0.075           | 0.000           | 0.000           | 0.000           | 0.597           | 123.157         | 150.308         |
| 0.108           | 0.457           | 0.000           | 0.000           | 1.141           | 0.000           | 0.008           | 38.897          | 0.000           | 0.136           | 0.000           | 0.000           | 0.000           | 0.466           | 73.230          | 216.708         |
| 0.116           | 0.070           | 0.000           | 0.082           | 1.939           | 0.020           | 0.105           | 20.023          | 0.000           | 0.479           | 0.019           | 0.000           | 0.088           | 0.133           | 61.175          | 70.783          |
| 0.043           | 0.599           | 0.000           | 0.000           | 2.694           | 0.022           | 0.045           | 29.777          | 0.000           | 0.163           | 0.000           | 0.039           | 0.000           | 1.003           | 71.359          | 134.313         |
| 0.000           | 0.247           | 0.000           | 0.000           | 1.367           | 0.000           | 0.025           | 16.521          | 0.000           | 0.025           | 0.000           | 0.000           | 0.000           | 0.143           | 103.037         | 103.037         |
| 0.000           | 0.550           | 0.000           | 0.000           | 0.938           | 0.000           | 0.000           | 49.195          | 0.000           | 0.109           | 0.000           | 0.000           | 0.000           | 0.218           | 121.104         | 185.741         |
| 0.201           | 0.488           | 0.000           | 0.000           | 1.740           | 0.000           | 0.000           | 30.509          | 0.000           | 0.073           | 0.000           | 0.000           | 0.000           | 1.044           | 47.446          | 228.200         |
| 0.000           | 1.028           | 0.000           | 0.000           | 4.329           | 0.000           | 0.000           | 42.117          | 0.000           | 0.057           | 0.000           | 0.000           | 0.000           | 0.137           | 151.506         | 219.564         |
| 0.077           | 0.070           | 0.000           | 0.000           | 4.904           | 0.000           | 0.000           | 29.114          | 0.000           | 0.063           | 0.000           | 0.000           | 0.000           | 0.167           | 101.994         | 136.162         |
| 0.045           | 1.895           | 0.000           | 0.000           | 2.559           | 0.000           | 0.016           | 53.447          | 0.000           | 0.047           | 0.000           | 0.000           | 0.000           | 0.098           | 124.056         | 159.362         |
| 0.000           | 0.214           | 0.000           | 0.000           |                 |                 |                 |                 |                 |                 |                 |                 |                 |                 |                 |                 |

| ENGG000022217 | ENGG000025303 | ENGG000027826 | ENGG000023304 | ENGG0000212518 | ENGG0000136052 | ENGG0000200645 | ENGG0000266107 | ENGG0000227271 | ENGG000025374 | ENGG0000169223 | ENGG0000199483 | ENGG0000230628 | ENGG0000260721 | ENGG0000066136 |
|---------------|---------------|---------------|---------------|----------------|----------------|----------------|----------------|----------------|---------------|----------------|----------------|----------------|----------------|----------------|
| 0.908         | 0.155         | 0.000         | 0.000         | 0.000          | 3.950          | 0.000          | 0.330          | 0.000          | 0.044         | 0.000          | 41.624         | 0.000          | 0.021          | 4.472          |
| 0.000         | 0.496         | 0.000         | 0.000         | 0.000          | 2.582          | 0.000          | 0.000          | 0.000          | 0.000         | 97.784         | 0.000          | 0.000          | 0.035          | 6.776          |
| 0.516         | 0.206         | 0.000         | 0.000         | 0.000          | 1.665          | 0.000          | 0.000          | 0.007          | 0.000         | 50.906         | 0.000          | 0.054          | 0.000          | 9.211          |
| 1.557         | 0.466         | 0.000         | 0.000         | 0.000          | 2.867          | 0.000          | 0.000          | 0.038          | 0.000         | 46.995         | 0.000          | 0.000          | 0.000          | 8.490          |
| 0.217         | 0.111         | 0.000         | 0.000         | 0.000          | 2.772          | 0.000          | 0.000          | 0.000          | 0.000         | 71.173         | 0.000          | 0.000          | 0.000          | 6.367          |
| 0.265         | 0.265         | 0.000         | 0.000         | 0.000          | 1.600          | 0.000          | 0.249          | 0.000          | 0.050         | 0.000          | 47.940         | 0.000          | 0.054          | 12.593         |
| 0.000         | 0.528         | 0.000         | 0.000         | 0.000          | 3.221          | 0.000          | 0.000          | 0.000          | 0.038         | 0.137          | 64.937         | 0.000          | 0.000          | 10.594         |
| 0.408         | 0.314         | 0.000         | 0.000         | 0.000          | 2.609          | 0.000          | 0.000          | 0.000          | 0.000         | 0.000          | 43.977         | 0.000          | 0.000          | 7.414          |
| 0.236         | 0.121         | 0.000         | 0.000         | 0.000          | 1.864          | 0.000          | 0.000          | 0.046          | 0.000         | 52.091         | 0.000          | 0.000          | 0.000          | 7.420          |
| 0.000         | 0.117         | 0.000         | 0.000         | 0.000          | 2.190          | 0.000          | 0.000          | 0.000          | 0.000         | 76.465         | 0.000          | 0.000          | 0.000          | 6.920          |
| 0.337         | 0.289         | 0.000         | 0.000         | 0.000          | 4.234          | 0.000          | 0.245          | 0.000          | 0.000         | 64.862         | 0.000          | 0.000          | 0.000          | 7.765          |
| 2.267         | 0.448         | 0.000         | 0.000         | 0.000          | 2.446          | 0.000          | 0.000          | 0.000          | 0.034         | 0.062          | 62.479         | 0.000          | 0.000          | 7.175          |
| 0.720         | 0.185         | 0.000         | 0.000         | 0.000          | 2.486          | 0.000          | 0.000          | 0.000          | 0.018         | 0.000          | 52.555         | 0.000          | 0.000          | 6.996          |
| 1.514         | 0.173         | 0.000         | 0.000         | 0.000          | 2.407          | 0.000          | 0.000          | 0.049          | 0.060         | 43.923         | 0.000          | 0.000          | 0.000          | 7.770          |
| 0.000         | 0.257         | 0.000         | 0.000         | 0.000          | 2.047          | 0.000          | 0.000          | 0.000          | 0.000         | 72.224         | 0.000          | 0.000          | 0.000          | 6.411          |
| 0.337         | 1.210         | 0.000         | 0.000         | 0.000          | 2.837          | 0.000          | 0.000          | 0.000          | 0.000         | 49.528         | 0.000          | 0.000          | 0.000          | 6.223          |
| 0.388         | 0.133         | 0.000         | 0.000         | 0.000          | 1.915          | 0.000          | 0.000          | 0.000          | 0.000         | 67.255         | 0.000          | 0.000          | 0.000          | 6.387          |
| 0.231         | 0.278         | 0.000         | 0.000         | 0.000          | 0.673          | 0.000          | 0.000          | 0.000          | 0.023         | 0.000          | 67.748         | 0.000          | 0.000          | 7.360          |
| 0.528         | 0.210         | 0.000         | 0.000         | 0.000          | 0.798          | 0.000          | 0.000          | 0.017          | 0.000         | 83.626         | 0.000          | 0.000          | 0.000          | 9.247          |
| 0.188         | 0.096         | 0.000         | 0.000         | 0.000          | 2.246          | 0.000          | 0.000          | 0.018          | 0.067         | 52.866         | 0.000          | 0.000          | 0.034          | 13.146         |
| 0.000         | 0.205         | 0.000         | 0.000         | 0.000          | 1.663          | 0.000          | 0.291          | 0.000          | 0.039         | 0.000          | 63.071         | 0.000          | 0.000          | 7.173          |
| 0.388         | 0.133         | 0.000         | 0.000         | 0.000          | 1.915          | 0.000          | 0.000          | 0.065          | 0.000         | 46.254         | 0.000          | 0.000          | 0.000          | 6.387          |
| 0.202         | 0.069         | 0.000         | 0.000         | 0.000          | 1.586          | 0.000          | 0.000          | 0.020          | 0.000         | 56.280         | 0.000          | 0.000          | 0.185          | 8.932          |
| 0.000         | 1.205         | 0.000         | 0.000         | 0.000          | 2.156          | 0.000          | 0.000          | 0.000          | 0.017         | 104.874        | 0.000          | 0.000          | 0.000          | 8.105          |
| 0.000         | 0.262         | 0.000         | 0.000         | 0.000          | 2.020          | 0.000          | 0.000          | 0.000          | 0.068         | 68.849         | 0.000          | 0.000          | 0.000          | 7.333          |
| 1.790         | 0.136         | 0.000         | 0.000         | 0.000          | 4.066          | 0.000          | 0.289          | 0.000          | 0.136         | 0.000          | 59.927         | 0.000          | 0.063          | 5.227          |
| 0.000         | 0.162         | 0.000         | 0.000         | 0.000          | 2.390          | 0.000          | 0.000          | 0.022          | 0.000         | 59.881         | 0.000          | 0.000          | 0.000          | 6.831          |
| 0.000         | 0.203         | 0.000         | 0.000         | 0.000          | 1.199          | 0.000          | 0.000          | 0.000          | 0.000         | 61.383         | 0.000          | 0.000          | 0.036          | 6.823          |
| 0.395         | 0.101         | 0.000         | 0.000         | 0.000          | 1.878          | 0.000          | 0.000          | 0.000          | 0.000         | 58.140         | 0.000          | 0.000          | 0.000          | 7.562          |
| 1.587         | 0.102         | 0.000         | 0.000         | 0.000          | 1.667          | 0.000          | 0.000          | 0.058          | 0.000         | 40.590         | 0.000          | 0.000          | 0.000          | 6.468          |
| 0.490         | 0.056         | 0.000         | 0.000         | 0.000          | 1.775          | 0.000          | 0.000          | 0.032          | 0.000         | 99.290         | 0.000          | 0.000          | 0.000          | 9.677          |
| 1.197         | 0.088         | 0.000         | 0.000         | 0.000          | 2.161          | 0.000          | 0.000          | 0.055          | 0.000         | 93.022         | 0.000          | 0.000          | 0.000          | 6.805          |
| 0.000         | 0.136         | 0.000         | 0.000         | 0.000          | 1.915          | 0.000          | 0.000          | 0.000          | 0.000         | 46.254         | 0.000          | 0.000          | 0.000          | 6.387          |
| 0.192         | 0.131         | 0.000         | 0.000         | 0.000          | 2.609          | 0.000          | 0.000          | 0.000          | 0.075         | 74.187         | 0.000          | 0.000          | 0.000          | 7.014          |
| 2.025         | 0.624         | 0.000         | 0.000         | 0.000          | 5.048          | 0.000          | 0.000          | 0.000          | 0.079         | 66.512         | 0.000          | 0.000          | 0.111          | 8.178          |
| 0.367         | 0.722         | 0.000         | 0.000         | 0.000          | 4.507          | 0.000          | 0.000          | 0.036          | 0.000         | 44.364         | 0.000          | 0.000          | 0.000          | 6.201          |
| 4.556         | 0.090         | 0.000         | 0.073         | 0.000          | 1.898          | 0.000          | 0.255          | 0.000          | 0.240         | 41.253         | 0.000          | 0.000          | 0.000          | 11.057         |
| 1.575         | 0.419         | 0.000         | 0.000         | 0.000          | 1.896          | 0.000          | 0.000          | 0.000          | 0.017         | 59.275         | 0.000          | 0.000          | 0.000          | 14.444         |
| 0.418         | 0.607         | 0.000         | 0.000         | 0.000          | 2.249          | 0.000          | 0.303          | 0.000          | 0.234         | 51.119         | 0.000          | 0.000          | 0.000          | 6.910          |
| 2.588         | 0.148         | 0.000         | 0.000         | 0.000          | 2.300          | 0.000          | 0.000          | 0.000          | 0.042         | 45.932         | 0.000          | 0.000          | 0.000          | 7.261          |
| 2.146         | 0.441         | 0.000         | 0.022         | 0.000          | 9.191          | 0.000          | 0.312          | 0.000          | 0.021         | 47.379         | 0.000          | 0.000          | 0.020          | 8.897          |
| 0.726         | 0.248         | 0.000         | 0.000         | 0.000          | 3.961          | 0.000          | 0.000          | 0.000          | 0.089         | 63.371         | 0.000          | 0.000          | 0.050          | 4.669          |
| 3.194         | 0.378         | 0.000         | 0.000         | 0.000          | 1.909          | 0.000          | 0.000          | 0.000          | 0.020         | 56.185         | 0.000          | 0.000          | 0.073          | 6.938          |
| 1.713         | 0.440         | 0.000         | 0.000         | 0.000          | 2.712          | 0.000          | 0.468          | 0.000          | 0.061         | 46.445         | 0.000          | 0.000          | 0.000          | 7.453          |
| 16.430        | 0.625         | 0.000         | 0.000         | 0.000          | 1.520          | 0.000          | 0.000          | 0.036          | 0.065         | 52.949         | 0.000          | 0.000          | 0.000          | 8.723          |
| 0.000         | 0.305         | 0.000         | 0.000         | 0.000          | 2.291          | 0.000          | 0.000          | 0.000          | 0.063         | 48.233         | 0.000          | 0.000          | 0.000          | 8.974          |
| 0.196         | 0.168         | 0.000         | 0.000         | 0.000          | 1.514          | 0.000          | 0.855          | 0.000          | 0.058         | 0.000          | 37.883         | 0.000          | 0.000          | 10.341         |
| 1.389         | 0.373         | 0.000         | 0.000         | 0.000          | 1.008          | 0.000          | 0.000          | 0.058          | 0.000         | 46.129         | 0.000          | 0.000          | 0.000          | 11.374         |
| 0.344         | 0.206         | 0.000         | 0.000         | 0.000          | 2.571          | 0.000          | 0.000          | 0.000          | 0.000         | 69.345         | 0.000          | 0.000          | 0.315          | 11.366         |
| 0.000         | 0.566         | 0.000         | 0.000         | 0.000          | 2.566          | 0.000          | 0.000          | 0.000          | 0.000         | 78.897         | 0.000          | 0.000          | 0.000          | 6.441          |
| 0.817         | 0.308         | 0.000         | 0.000         | 0.000          | 2.804          | 0.000          | 0.237          | 0.000          | 0.032         | 46.410         | 0.000          | 0.000          | 0.015          | 7.414          |
| 0.176         | 0.331         | 0.000         | 0.000         | 0.000          | 2.368          | 0.000          | 0.000          | 0.052          | 0.000         | 102.353        | 0.000          | 0.000          | 0.016          | 7.258          |
| 0.716         | 0.367         | 0.000         | 0.000         | 0.000          | 3.100          | 0.000          | 0.000          | 0.000          | 0.000         | 64.064         | 0.000          | 0.000          | 0.000          | 9.280          |
| 1.265         | 0.216         | 0.000         | 0.000         | 0.000          | 2.215          | 0.000          | 0.000          | 0.000          | 0.000         | 56.394         | 0.000          | 0.000          | 0.014          | 6.106          |
| 0.000         | 0.260         | 0.000         | 0.000         | 0.000          | 1.926          | 0.000          | 0.000          | 0.000          | 0.000         | 120.789        | 0.000          | 0.000          | 0.000          | 6.216          |
| 1.517         | 0.130         | 0.000         | 0.000         | 0.000          | 1.926          | 0.000          | 0.000          | 0.000          | 0.539         | 19.957         | 0.000          | 0.000          | 0.000          | 8.836          |
| 1.131         | 0.194         | 0.000         | 0.000         | 0.000          | 2.166          | 0.000          | 0.000          | 0.018          | 0.000         | 69.461         | 0.000          | 0.000          | 0.000          | 5.828          |
| 0.891         | 0.457         | 0.000         | 0.000         | 0.000          | 1.538          | 0.000          | 0.000          | 0.000          | 0.000         | 72.676         | 0.000          | 0.000          | 0.000          | 12.171         |
| 0.708         | 0.273         | 0.000         | 0.000         | 0.000          | 4.528          | 0.000          | 0.000          | 0.052          | 0.000         | 47.813         | 0.000          | 0.000          | 0.000          | 8.119          |
| 0.660         | 0.113         | 0.000         | 0.052         | 0.000          | 4.214          | 0.000          | 0.000          | 0.000          | 0.000         | 73.775         | 0.000          | 0.000          | 0.000          | 8.402          |
| 0.418         | 0.607         | 0.000         | 0.000         | 0.000          | 2.249          | 0.000          | 0.303          | 0.000          | 0.234         | 46.445         | 0.000          | 0.000          | 0.000          | 12.635         |
| 0.606         | 0.207         | 0.000         | 0.000         | 0.000          | 1.589          | 0.000          | 0.000          | 0.000          | 0.000         | 66.777         | 0.000          | 0.000          | 0.028          | 7.696          |
| 1.419         | 0.081         | 0.000         | 0.000         | 0.000          | 2.171          | 0.000          | 0.458          | 0.000          | 0.046         | 47.578         | 0.000          | 0.000          | 0.000          | 7.062          |
| 0.845         | 0.434         | 0.000         | 0.000         | 0.000          | 2.275          | 0.000          | 0.000          | 0.000          | 0.000         | 81.042         | 0.000          | 0.000          | 0.000          | 9.245          |
| 0.377         | 0.097         | 0.000         | 0.000         | 0.000          | 3.807          | 0.000          | 0.000          | 0.000          | 0.000         | 56.625         | 0.000          | 0.000          | 0.000          | 11.621         |
| 0.000         | 0.465         | 0.000         | 0.000         | 0.000          | 0.076          | 0.000          | 0.000          | 0.000          | 0.000         | 70.507         | 0.000          | 0.000          | 0.000          | 7.771          |
| 0.000         | 0.114         | 0.000         | 0.035         | 0.000          | 1.848          | 0.000          | 0.000          | 0.000          | 0.000         | 74.766         | 0.000          | 0.000          | 0.000          | 6.386          |
| 0.000         | 0.038         | 0.000         | 0.000         | 0.000          | 1.349          | 0.000          | 0.000          | 0.000          | 0.000         | 126.869        | 0.000          | 0.000          | 0.040          | 6.027          |
| 1.766         | 0.252         | 0.000         | 0.000         | 0.249          | 2.067          | 0.000          | 0.000          | 0.000          | 0.000         | 84.915         | 0.000          | 0.000          | 0.000          | 11.613         |
| 0.465         | 0.080         | 0.000         | 0.000         | 0.000          | 2.853          | 0.000          | 0.000          | 0.000          | 0.063         | 104.170        | 0.000          | 0.000          | 0.021          | 9.023          |
| 0.169         | 0.116         | 0.000         | 0.018         | 0.000          | 2.241          | 0.000          | 0.000          | 0.000          | 0.000         | 87.002         | 0.000          | 0.000          | 0.000          | 7.678          |
| 0.000         | 0.203         | 0.000         | 0.000         | 0.000          | 1.199          | 0.000          | 0.000          | 0.000          | 0.000         | 61.383         | 0.000          | 0.000          | 0.000          | 6.823          |
| 0.310         | 0.319         | 0.000         | 0.016         | 0.000          | 3.882          | 0.000          | 0.000          | 0.000          | 0.015         | 0.000          | 51.720         | 0.000          | 0.000          | 5.209          |
| 0.000         | 0.209         | 0.000         | 0.000         | 0.000          | 2.835          | 0.000          | 0.000          | 0.000          | 0.000         | 77.816         | 0.000          | 0.000          | 0.028          | 8.149          |
| 0.233         | 0.200         | 0.000         | 0.000         | 0.000          | 3.031          | 0.000          | 0.000          | 0.000          | 0.063         | 66.444         | 0.000          | 0.000          | 0.000          | 5.356          |
| 2.249         | 0.096         | 0.000         | 0.000         | 0.000          | 2.315          | 0.000          | 0.000          | 0.028          | 0.000         | 52.553         | 0.000          | 0.000          | 0.000          | 7.343          |
| 0.015         | 0.205         | 0.000         | 0.000         | 0.000          | 1.926          | 0.000          | 0.000          | 0.000          | 0.000         | 71.004         | 0.000          | 0.000          | 0.000          | 10.033         |
| 0.000         | 0.000         | 0.000         | 0.            |                |                |                |                |                |               |                |                |                |                |                |

| ENSG000026917 | ENSG0000241102 | ENSG0000227161 | ENSG0000227140 | ENSG0000114405 | ENSG000016894 | ENSG0000192367 | ENSG0000164111 | ENSG0000225484 | ENSG0000227518 | ENSG0000171302 | ENSG0000245112 | ENSG0000272124 | ENSG0000166013 | ENSG0000240889 |
|---------------|----------------|----------------|----------------|----------------|---------------|----------------|----------------|----------------|----------------|----------------|----------------|----------------|----------------|----------------|
| 0.000         | 0.000          | 2.003          | 0.000          | 0.535          | 0.185         | 0.050          | 0.904          | 114.921        | 0.600          | 0.000          | 15.676         | 0.210          | 0.238          | 0.000          |
| 0.000         | 0.059          | 3.906          | 0.000          | 0.000          | 0.102         | 0.000          | 1.071          | 273.217        | 0.595          | 0.000          | 24.835         | 0.045          | 0.135          | 0.000          |
| 0.000         | 0.000          | 4.958          | 0.000          | 0.000          | 0.084         | 0.013          | 1.854          | 97.595         | 0.435          | 0.000          | 39.235         | 0.079          | 0.120          | 0.000          |
| 0.000         | 0.000          | 3.984          | 0.437          | 0.000          | 0.325         | 0.000          | 2.340          | 123.987        | 0.210          | 0.015          | 22.682         | 0.045          | 0.544          | 0.000          |
| 0.000         | 0.450          | 2.165          | 0.000          | 0.000          | 0.160         | 0.000          | 1.165          | 269.212        | 0.165          | 0.000          | 30.165         | 0.050          | 0.365          | 0.000          |
| 0.000         | 0.872          | 0.577          | 0.034          | 0.244          | 0.006         | 0.006          | 2.184          | 59.278         | 0.453          | 0.019          | 17.980         | 0.118          | 0.538          | 0.000          |
| 0.000         | 0.000          | 3.854          | 0.650          | 0.000          | 0.102         | 0.000          | 1.554          | 303.654        | 0.518          | 0.000          | 19.833         | 0.000          | 0.067          | 0.000          |
| 0.000         | 0.000          | 2.237          | 0.229          | 0.000          | 1.428         | 0.015          | 0.796          | 153.322        | 0.492          | 0.000          | 24.915         | 0.094          | 0.000          | 0.000          |
| 0.000         | 0.000          | 1.516          | 0.265          | 0.000          | 0.853         | 0.004          | 1.155          | 188.117        | 0.398          | 0.000          | 37.355         | 0.000          | 0.165          | 0.000          |
| 0.000         | 0.000          | 2.309          | 0.000          | 0.000          | 0.363         | 0.025          | 1.092          | 211.751        | 0.522          | 0.000          | 32.859         | 0.079          | 0.239          | 0.000          |
| 0.000         | 0.000          | 1.804          | 0.000          | 0.000          | 1.810         | 0.009          | 0.895          | 173.645        | 0.477          | 0.013          | 30.838         | 0.019          | 0.471          | 0.000          |
| 0.000         | 0.000          | 2.220          | 0.196          | 0.000          | 0.248         | 0.006          | 1.379          | 246.138        | 0.452          | 0.000          | 17.634         | 0.161          | 0.183          | 0.000          |
| 0.000         | 0.000          | 5.900          | 0.202          | 0.035          | 1.501         | 0.000          | 2.209          | 292.325        | 0.342          | 0.000          | 15.611         | 0.145          | 0.314          | 0.000          |
| 0.000         | 0.051          | 2.711          | 0.189          | 0.000          | 0.602         | 0.000          | 2.411          | 245.544        | 0.275          | 0.025          | 15.808         | 0.155          | 0.470          | 0.000          |
| 0.000         | 0.000          | 3.376          | 0.000          | 0.147          | 0.580         | 0.000          | 1.098          | 184.944        | 0.260          | 0.000          | 22.220         | 0.086          | 0.000          | 0.000          |
| 0.000         | 0.000          | 3.032          | 0.379          | 0.000          | 0.233         | 0.003          | 1.501          | 139.795        | 0.518          | 0.006          | 13.159         | 0.086          | 0.118          | 0.000          |
| 0.000         | 0.000          | 3.469          | 0.000          | 0.000          | 0.379         | 0.060          | 1.323          | 189.662        | 0.393          | 0.007          | 28.809         | 0.134          | 0.339          | 0.000          |
| 0.000         | 0.000          | 2.038          | 0.259          | 0.000          | 0.225         | 0.003          | 0.989          | 168.976        | 0.744          | 0.034          | 43.688         | 0.000          | 0.242          | 0.000          |
| 0.000         | 0.000          | 4.060          | 0.000          | 0.000          | 0.314         | 0.000          | 1.320          | 386.140        | 0.378          | 0.000          | 17.568         | 0.061          | 0.306          | 0.000          |
| 0.000         | 0.000          | 3.565          | 0.000          | 0.000          | 0.527         | 0.000          | 1.122          | 250.069        | 0.331          | 0.000          | 18.212         | 0.087          | 0.393          | 0.000          |
| 0.000         | 0.000          | 1.491          | 0.000          | 0.000          | 0.976         | 0.004          | 1.155          | 199.159        | 0.390          | 0.015          | 75.843         | 0.092          | 0.349          | 0.000          |
| 0.000         | 0.000          | 4.235          | 0.929          | 0.284          | 0.505         | 0.023          | 1.709          | 53.703         | 0.817          | 0.031          | 15.244         | 0.215          | 0.505          | 0.000          |
| 0.000         | 0.000          | 4.390          | 0.227          | 0.000          | 0.411         | 0.140          | 1.369          | 127.712        | 0.485          | 0.000          | 33.575         | 0.070          | 0.212          | 0.000          |
| 0.000         | 0.000          | 3.508          | 0.000          | 0.000          | 0.105         | 0.003          | 0.719          | 285.151        | 0.357          | 0.006          | 24.012         | 0.040          | 0.000          | 0.000          |
| 0.000         | 0.000          | 2.575          | 0.845          | 0.000          | 0.257         | 0.004          | 1.513          | 215.154        | 0.589          | 0.007          | 21.065         | 0.022          | 0.334          | 0.000          |
| 0.000         | 0.000          | 1.580          | 0.224          | 0.000          | 0.332         | 0.004          | 1.369          | 96.039         | 0.447          | 0.015          | 19.088         | 0.046          | 0.069          | 0.000          |
| 0.000         | 0.000          | 1.823          | 0.247          | 0.000          | 0.177         | 0.008          | 1.053          | 192.724        | 0.399          | 0.006          | 21.868         | 0.026          | 0.393          | 0.000          |
| 0.000         | 0.000          | 1.054          | 0.000          | 0.000          | 0.371         | 0.008          | 0.977          | 173.212        | 0.524          | 0.012          | 20.409         | 0.137          | 0.048          | 0.046          |
| 0.000         | 0.000          | 1.930          | 0.222          | 1.279          | 1.469         | 0.000          | 1.738          | 391.197        | 0.415          | 0.015          | 24.093         | 0.046          | 0.896          | 0.000          |
| 0.000         | 0.000          | 1.399          | 0.446          | 0.078          | 0.646         | 0.000          | 2.079          | 288.109        | 0.353          | 0.015          | 28.641         | 0.092          | 0.000          | 0.000          |
| 0.000         | 0.000          | 0.744          | 0.183          | 0.032          | 0.046         | 0.000          | 0.801          | 219.092        | 0.473          | 0.006          | 40.890         | 0.094          | 0.057          | 0.000          |
| 0.000         | 0.000          | 2.215          | 0.384          | 0.000          | 0.230         | 0.000          | 0.861          | 192.459        | 0.244          | 0.019          | 16.760         | 0.079          | 0.836          | 0.033          |
| 0.000         | 0.000          | 0.945          | 0.224          | 0.078          | 0.449         | 0.000          | 1.323          | 159.662        | 0.451          | 0.006          | 18.946         | 0.046          | 0.139          | 0.000          |
| 0.000         | 0.000          | 1.159          | 0.216          | 0.000          | 0.390         | 0.000          | 1.153          | 147.766        | 0.408          | 0.021          | 32.400         | 0.000          | 0.402          | 0.000          |
| 0.000         | 0.000          | 1.730          | 0.000          | 0.000          | 0.511         | 0.000          | 1.227          | 218.338        | 0.359          | 0.030          | 24.143         | 0.047          | 0.283          | 0.000          |
| 0.000         | 0.000          | 2.627          | 0.206          | 0.000          | 0.684         | 0.003          | 1.159          | 198.571        | 0.431          | 0.007          | 23.416         | 0.000          | 0.192          | 0.000          |
| 0.000         | 0.000          | 5.949          | 0.197          | 0.344          | 2.203         | 0.003          | 1.233          | 190.192        | 0.294          | 0.013          | 10.759         | 0.202          | 0.735          | 0.011          |
| 0.000         | 0.000          | 5.970          | 0.590          | 0.034          | 0.413         | 0.000          | 1.721          | 129.436        | 0.516          | 0.013          | 20.705         | 0.081          | 0.428          | 0.000          |
| 0.000         | 0.000          | 6.307          | 0.397          | 0.041          | 0.357         | 0.149          | 1.507          | 157.652        | 0.387          | 0.016          | 25.802         | 0.217          | 0.365          | 0.000          |
| 0.000         | 0.000          | 4.487          | 0.485          | 0.000          | 0.448         | 0.004          | 1.972          | 355.556        | 0.354          | 0.016          | 21.984         | 0.124          | 0.603          | 0.000          |
| 0.000         | 0.000          | 1.232          | 0.482          | 0.000          | 0.952         | 0.000          | 0.573          | 211.954        | 0.411          | 0.000          | 24.067         | 0.074          | 0.300          | 0.000          |
| 0.000         | 0.000          | 3.506          | 0.408          | 0.000          | 0.096         | 0.010          | 0.536          | 327.061        | 0.390          | 0.020          | 20.218         | 0.105          | 0.317          | 0.000          |
| 0.000         | 0.000          | 3.819          | 0.224          | 0.000          | 0.219         | 0.004          | 1.456          | 294.136        | 0.420          | 0.015          | 27.290         | 0.092          | 0.349          | 0.000          |
| 0.000         | 0.000          | 5.154          | 0.365          | 0.000          | 0.335         | 0.000          | 1.430          | 289.294        | 0.561          | 0.026          | 11.844         | 0.079          | 0.568          | 0.000          |
| 0.000         | 0.000          | 2.302          | 0.205          | 0.036          | 0.275         | 0.003          | 2.105          | 288.249        | 0.379          | 0.007          | 19.550         | 0.021          | 1.467          | 0.000          |
| 0.000         | 0.000          | 4.207          | 0.200          | 0.000          | 0.681         | 0.007          | 1.280          | 210.579        | 0.335          | 0.013          | 19.687         | 0.062          | 0.560          | 0.000          |
| 0.000         | 0.000          | 15.652         | 0.681          | 0.000          | 0.965         | 0.000          | 0.811          | 68.031         | 0.459          | 0.029          | 25.773         | 0.000          | 0.822          | 0.000          |
| 0.000         | 0.000          | 5.347          | 0.223          | 0.234          | 0.291         | 0.087          | 1.361          | 122.946        | 0.701          | 0.000          | 17.953         | 0.137          | 0.485          | 0.000          |
| 0.000         | 0.000          | 1.875          | 0.193          | 0.000          | 0.338         | 0.000          | 1.863          | 200.272        | 0.355          | 0.006          | 23.429         | 0.000          | 0.000          | 0.000          |
| 0.000         | 0.000          | 1.863          | 0.000          | 0.000          | 0.345         | 0.000          | 0.863          | 233.524        | 0.524          | 0.012          | 20.409         | 0.094          | 0.114          | 0.000          |
| 0.000         | 0.000          | 0.963          | 0.184          | 0.000          | 0.758         | 0.063          | 0.982          | 102.656        | 0.578          | 0.030          | 47.523         | 0.132          | 0.057          | 0.000          |
| 0.000         | 0.000          | 2.154          | 0.197          | 0.069          | 0.365         | 0.000          | 0.961          | 157.791        | 0.467          | 0.000          | 25.638         | 0.142          | 0.000          | 0.000          |
| 0.000         | 0.000          | 4.916          | 0.402          | 0.000          | 0.408         | 0.026          | 1.240          | 187.687        | 0.324          | 0.007          | 36.447         | 0.124          | 0.437          | 0.000          |
| 0.000         | 0.000          | 1.702          | 0.888          | 0.000          | 0.360         | 0.000          | 2.233          | 451.250        | 0.377          | 0.006          | 23.587         | 0.073          | 0.221          | 0.000          |
| 0.000         | 0.000          | 5.154          | 0.365          | 0.000          | 0.335         | 0.000          | 1.430          | 289.294        | 0.561          | 0.026          | 11.844         | 0.079          | 0.568          | 0.000          |
| 0.000         | 0.000          | 1.879          | 0.000          | 0.745          | 0.339         | 0.028          | 1.558          | 123.266        | 0.482          | 0.028          | 31.841         | 0.000          | 0.265          | 0.000          |
| 0.000         | 0.000          | 2.974          | 0.212          | 0.000          | 0.591         | 0.003          | 1.322          | 293.756        | 0.384          | 0.014          | 27.911         | 0.087          | 0.329          | 0.000          |
| 0.000         | 0.000          | 2.765          | 0.200          | 0.000          | 0.261         | 0.013          | 1.423          | 428.883        | 0.382          | 0.007          | 18.975         | 0.144          | 0.311          | 0.000          |
| 0.000         | 0.000          | 2.768          | 0.000          | 0.000          | 0.223         | 0.000          | 1.395          | 211.796        | 0.705          | 0.000          | 18.615         | 0.020          | 0.000          | 0.000          |
| 0.000         | 0.000          | 2.884          | 0.000          | 0.000          | 0.578         | 0.000          | 1.035          | 78.189         | 0.520          | 0.000          | 28.637         | 0.038          | 0.173          | 0.000          |
| 0.000         | 0.000          | 6.307          | 0.397          | 0.041          | 0.357         | 0.149          | 1.507          | 157.652        | 0.387          | 0.016          | 25.802         | 0.217          | 0.365          | 0.000          |
| 0.000         | 0.000          | 1.942          | 0.340          | 0.000          | 0.148         | 0.006          | 1.454          | 208.182        | 0.394          | 0.011          | 35.517         | 0.024          | 0.423          | 0.000          |
| 0.000         | 0.000          | 6.573          | 0.177          | 0.031          | 0.629         | 0.095          | 1.498          | 104.940        | 0.633          | 0.024          | 17.712         | 0.164          | 0.716          | 0.000          |
| 0.000         | 0.000          | 2.506          | 0.190          | 0.033          | 0.083         | 0.000          | 1.185          | 184.309        | 0.448          | 0.025          | 15.767         | 0.039          | 0.177          | 0.000          |
| 0.000         | 0.000          | 0.946          | 0.000          | 0.000          | 2.315         | 0.017          | 1.452          | 263.107        | 0.283          | 0.000          | 33.245         | 0.065          | 0.000          | 0.000          |
| 0.000         | 0.000          | 1.871          | 0.000          | 0.000          | 0.561         | 0.000          | 0.711          | 107.683        | 0.369          | 0.010          | 27.741         | 0.000          | 0.305          | 0.000          |
| 0.000         | 0.000          | 2.606          | 0.000          | 0.000          | 0.081         | 0.000          | 1.833          | 435.012        | 0.446          | 0.012          | 23.142         | 0.153          | 0.348          | 0.000          |
| 0.000         | 0.000          | 1.071          | 0.000          | 0.000          | 0.315         | 0.000          | 1.592          | 664.767        | 0.353          | 0.000          | 35.430         | 0.077          | 0.077          | 0.000          |
| 0.000         | 0.000          | 2.851          | 0.000          | 0.000          | 0.227         | 0.011          | 1.852          | 164.338        | 0.267          | 0.022          | 17.177         | 0.000          | 0.411          | 0.000          |
| 0.000         | 0.000          | 1.181          | 0.000          | 0.000          | 0.189         | 0.004          | 0.704          | 255.020        | 0.292          | 0.000          | 41.096         | 0.000          | 0.000          | 0.000          |
| 0.000         | 0.000          | 2.132          | 0.000          | 0.000          | 0.165         | 0.003          | 1.231          | 394.887        | 0.290          | 0.006          | 25.122         | 0.059          | 0.000          | 0.000          |
| 0.000         | 0.000          | 1.776          | 0.468          | 0.385          | 0.000         | 0.000          | 1.844          | 219.597        | 0.468          | 0.000          | 59.844         | 0.000          | 0.239          | 0.000          |
| 0.000         | 0.000          | 2.747          | 0.174          | 0.000          | 0.297         | 0.017          | 0.658          | 317.879        | 0.401          | 0.000          | 23.384         | 0.054          | 0.163          | 0.000          |
| 0.000         | 0.000          | 1.597          | 0.000          | 0.060          | 0.174         | 0.000          | 1.524          | 414.592        | 0.484          | 0.011          | 33.856         | 0.035          | 0.214          | 0.000          |
| 0.000         | 0.000          | 2.695          | 0.000          | 0.000          | 0.104         | 0.000          | 1.894          | 184.100        | 0.078          | 0.000          | 14.772         | 0.108          | 0.000          | 0.000          |
| 0.000         | 0.000          | 4.986          | 0.316          | 0.055          | 2.860         | 0.000          | 1.755          | 399.327        | 0.239          | 0.000          | 27.773         | 0.000          | 0.295          | 0.000          |
| 0.000         | 0.000          | 2.025          | 0.114          | 0.000          | 0.339         |                |                |                |                |                |                |                |                |                |



| ENSG0000021611 | ENSG0000016487 | ENSG0000027202 | ENSG0000023161 | ENSG0000012283 | ENSG0000026304 | ENSG0000010172 | ENSG0000012451 | ENSG0000022873 | ENSG0000026493 | ENSG0000024856 | ENSG0000027899 | ENSG0000010624 | ENSG0000017660 | ENSG0000025479 |
|----------------|----------------|----------------|----------------|----------------|----------------|----------------|----------------|----------------|----------------|----------------|----------------|----------------|----------------|----------------|
| 0.009          | 6.462          | 0.158          | 0.000          | 2.308          | 0.063          | 0.000          | 0.000          | 0.000          | 0.867          | 3.524          | 0.022          | 107.329        | 2.127          | 0.016          |
| 0.015          | 6.689          | 0.188          | 0.000          | 1.327          | 0.162          | 0.197          | 0.000          | 0.000          | 0.010          | 0.041          | 5.840          | 0.000          | 114.176        | 2.352          |
| 0.000          | 1.779          | 0.048          | 0.000          | 2.164          | 0.048          | 0.000          | 0.000          | 0.039          | 0.015          | 0.160          | 9.947          | 0.008          | 11.159         | 9.588          |
| 0.008          | 2.861          | 0.297          | 0.000          | 3.332          | 0.054          | 0.000          | 0.000          | 0.000          | 0.003          | 0.735          | 5.333          | 0.009          | 116.615        | 3.895          |
| 0.009          | 8.160          | 0.023          | 0.000          | 1.070          | 0.000          | 0.000          | 0.000          | 0.000          | 0.000          | 0.000          | 0.000          | 0.000          | 276.248        | 0.030          |
| 0.027          | 5.208          | 0.546          | 0.000          | 5.458          | 0.048          | 0.000          | 0.000          | 0.026          | 0.027          | 0.203          | 7.453          | 0.083          | 2.880          | 6.888          |
| 0.015          | 9.763          | 0.054          | 0.000          | 2.264          | 0.000          | 0.000          | 0.000          | 0.000          | 0.007          | 0.025          | 7.125          | 0.019          | 192.246        | 4.743          |
| 0.073          | 2.778          | 0.028          | 0.000          | 1.588          | 0.000          | 0.000          | 0.000          | 0.000          | 0.014          | 1.834          | 5.689          | 0.010          | 40.915         | 0.230          |
| 0.009          | 3.820          | 0.033          | 0.000          | 1.860          | 0.000          | 0.240          | 0.000          | 0.000          | 0.012          | 0.560          | 8.653          | 0.011          | 57.417         | 3.841          |
| 0.027          | 8.718          | 0.000          | 0.000          | 1.637          | 0.000          | 0.000          | 0.000          | 0.052          | 0.038          | 0.145          | 5.645          | 0.033          | 43.687         | 0.869          |
| 0.020          | 14.768         | 0.023          | 0.000          | 2.124          | 0.047          | 0.000          | 0.000          | 0.013          | 0.009          | 0.172          | 8.062          | 0.016          | 47.534         | 0.763          |
| 0.042          | 14.190         | 0.169          | 0.000          | 3.718          | 0.000          | 0.355          | 0.000          | 0.013          | 0.015          | 0.052          | 4.204          | 0.025          | 75.966         | 4.065          |
| 0.000          | 3.650          | 0.050          | 0.000          | 1.617          | 0.000          | 0.000          | 0.000          | 0.000          | 0.006          | 1.565          | 4.260          | 0.026          | 131.718        | 2.382          |
| 0.007          | 7.437          | 0.164          | 0.000          | 1.823          | 0.000          | 0.000          | 0.000          | 0.000          | 0.041          | 0.221          | 3.058          | 0.057          | 149.790        | 2.056          |
| 0.080          | 4.297          | 0.000          | 0.000          | 2.055          | 0.000          | 0.000          | 0.000          | 0.000          | 0.013          | 1.018          | 4.542          | 0.000          | 77.883         | 3.433          |
| 0.000          | 3.635          | 0.047          | 0.000          | 2.866          | 0.000          | 0.000          | 0.000          | 0.013          | 0.003          | 0.238          | 2.241          | 0.025          | 126.289        | 0.166          |
| 0.000          | 2.700          | 0.055          | 0.000          | 3.369          | 0.054          | 0.000          | 0.000          | 0.000          | 0.000          | 0.049          | 15.818         | 0.000          | 53.329         | 5.862          |
| 0.009          | 1.495          | 0.032          | 0.000          | 1.084          | 0.000          | 0.000          | 0.000          | 0.017          | 0.008          | 0.890          | 21.772         | 0.000          | 9.216          | 4.921          |
| 0.014          | 13.324         | 0.049          | 0.000          | 1.218          | 0.098          | 0.000          | 0.000          | 0.000          | 0.012          | 0.328          | 3.570          | 0.017          | 38.143         | 1.699          |
| 0.000          | 7.053          | 0.078          | 0.000          | 2.346          | 0.052          | 0.191          | 0.000          | 0.014          | 0.006          | 0.501          | 4.307          | 0.027          | 84.441         | 2.490          |
| 0.024          | 2.755          | 0.000          | 0.000          | 0.859          | 0.112          | 0.000          | 0.000          | 0.000          | 0.010          | 2.180          | 19.830         | 0.000          | 16.003         | 7.154          |
| 0.008          | 2.214          | 0.402          | 0.000          | 4.120          | 0.000          | 0.000          | 0.000          | 0.016          | 0.025          | 0.875          | 5.810          | 0.030          | 14.086         | 3.283          |
| 0.144          | 2.405          | 0.028          | 0.000          | 2.243          | 0.113          | 0.206          | 0.000          | 0.000          | 0.000          | 0.100          | 0.660          | 0.049          | 18.361         | 8.832          |
| 0.075          | 15.206         | 0.048          | 0.000          | 2.030          | 0.000          | 0.000          | 0.000          | 0.013          | 0.003          | 0.073          | 3.537          | 0.000          | 189.920        | 4.326          |
| 0.000          | 5.560          | 0.053          | 0.000          | 1.664          | 0.000          | 0.000          | 0.000          | 0.014          | 0.003          | 0.106          | 3.946          | 0.028          | 129.246        | 1.650          |
| 0.000          | 12.702         | 0.138          | 0.000          | 2.734          | 0.000          | 0.203          | 0.000          | 0.000          | 0.010          | 0.633          | 5.355          | 0.019          | 192.817        | 6.115          |
| 0.009          | 6.799          | 0.031          | 0.000          | 2.004          | 0.189          | 0.000          | 0.000          | 0.000          | 0.000          | 0.302          | 5.157          | 0.000          | 105.578        | 1.790          |
| 0.036          | 8.041          | 0.000          | 0.000          | 2.110          | 0.111          | 0.449          | 0.000          | 0.000          | 0.027          | 2.847          | 17.281         | 0.039          | 89.625         | 7.043          |
| 0.000          | 16.253         | 0.082          | 0.000          | 2.132          | 0.055          | 0.402          | 0.000          | 0.000          | 0.010          | 1.038          | 6.178          | 0.077          | 123.833        | 1.786          |
| 0.000          | 6.965          | 0.083          | 0.000          | 2.875          | 0.111          | 0.202          | 0.000          | 0.000          | 0.017          | 0.236          | 6.897          | 0.029          | 48.719         | 3.899          |
| 0.045          | 4.474          | 0.091          | 0.000          | 1.621          | 0.046          | 0.166          | 0.000          | 0.012          | 0.003          | 0.679          | 9.001          | 0.016          | 130.060        | 4.736          |
| 0.000          | 10.091         | 0.190          | 0.000          | 2.745          | 0.048          | 0.174          | 0.000          | 0.013          | 0.009          | 0.044          | 4.110          | 0.067          | 178.801        | 1.741          |
| 0.000          | 2.700          | 0.081          | 0.000          | 1.250          | 0.000          | 0.203          | 0.000          | 0.000          | 0.000          | 0.751          | 7.114          | 0.000          | 163.400        | 0.028          |
| 0.053          | 19.916         | 0.000          | 0.000          | 1.621          | 0.054          | 0.000          | 0.000          | 0.000          | 0.020          | 0.252          | 4.832          | 0.019          | 287.614        | 1.459          |
| 0.016          | 11.627         | 0.112          | 0.000          | 3.343          | 0.000          | 0.000          | 0.000          | 0.000          | 0.007          | 0.086          | 4.057          | 0.039          | 298.895        | 2.938          |
| 0.095          | 13.161         | 0.127          | 0.000          | 2.304          | 0.051          | 0.374          | 0.000          | 0.014          | 0.013          | 1.969          | 5.419          | 0.018          | 89.337         | 0.536          |
| 0.049          | 8.801          | 0.268          | 0.000          | 2.279          | 0.049          | 0.000          | 0.000          | 0.013          | 0.057          | 3.591          | 4.822          | 0.043          | 34.189         | 1.395          |
| 0.021          | 3.288          | 0.243          | 0.000          | 2.567          | 0.049          | 0.000          | 0.000          | 0.013          | 0.015          | 0.802          | 4.116          | 0.017          | 129.048        | 4.154          |
| 0.033          | 6.106          | 0.116          | 0.000          | 2.161          | 0.000          | 0.000          | 0.000          | 0.000          | 0.000          | 2.960          | 9.530          | 0.010          | 57.221         | 6.110          |
| 0.017          | 6.894          | 0.389          | 0.000          | 4.075          | 0.000          | 0.439          | 0.000          | 0.000          | 0.015          | 0.366          | 8.770          | 0.053          | 157.489        | 7.938          |
| 0.051          | 10.941         | 0.089          | 0.000          | 2.767          | 0.060          | 0.219          | 0.000          | 0.033          | 0.022          | 0.219          | 7.945          | 0.052          | 89.862         | 1.217          |
| 0.036          | 25.188         | 0.756          | 0.000          | 3.465          | 0.000          | 0.185          | 0.000          | 0.014          | 0.013          | 0.100          | 8.654          | 0.053          | 85.031         | 1.731          |
| 0.063          | 4.920          | 0.139          | 0.000          | 2.362          | 0.000          | 0.203          | 0.000          | 0.000          | 0.007          | 0.059          | 8.187          | 0.029          | 62.853         | 3.255          |
| 0.046          | 20.309         | 0.214          | 0.000          | 3.736          | 0.046          | 0.175          | 0.000          | 0.000          | 0.003          | 0.749          | 5.996          | 0.017          | 200.263        | 2.369          |
| 0.020          | 8.290          | 0.081          | 0.000          | 4.088          | 0.204          | 0.000          | 0.000          | 0.000          | 0.013          | 0.063          | 6.817          | 0.027          | 57.770         | 1.993          |
| 0.021          | 9.874          | 0.000          | 0.000          | 4.088          | 0.000          | 0.000          | 0.000          | 0.013          | 0.061          | 2.085          | 5.210          | 0.026          | 125.587        | 4.603          |
| 0.047          | 2.033          | 0.681          | 0.000          | 2.399          | 0.000          | 0.000          | 0.000          | 0.015          | 0.000          | 0.641          | 6.288          | 0.048          | 35.536         | 10.206         |
| 0.016          | 4.410          | 0.303          | 0.000          | 3.191          | 0.055          | 0.809          | 0.000          | 0.000          | 0.021          | 1.238          | 7.078          | 0.029          | 47.254         | 2.509          |
| 0.014          | 5.154          | 0.263          | 0.000          | 2.236          | 0.096          | 0.000          | 0.000          | 0.000          | 0.000          | 0.044          | 7.146          | 0.000          | 207.497        | 4.030          |
| 0.033          | 6.945          | 0.000          | 0.000          | 1.720          | 0.045          | 0.000          | 0.000          | 0.000          | 0.000          | 0.083          | 5.108          | 0.010          | 31.255         | 0.023          |
| 0.110          | 2.916          | 0.068          | 0.000          | 1.766          | 0.000          | 0.000          | 0.000          | 0.000          | 0.011          | 0.964          | 14.213         | 0.048          | 23.374         | 3.631          |
| 0.042          | 4.792          | 0.049          | 0.000          | 1.195          | 0.000          | 0.000          | 0.000          | 0.013          | 0.003          | 0.313          | 6.782          | 0.034          | 36.757         | 1.827          |
| 0.000          | 3.526          | 0.124          | 0.000          | 2.301          | 0.050          | 0.000          | 0.000          | 0.014          | 0.006          | 0.471          | 8.832          | 0.017          | 68.940         | 9.305          |
| 0.000          | 9.430          | 0.066          | 0.000          | 2.098          | 0.044          | 0.000          | 0.000          | 0.000          | 0.005          | 0.094          | 5.603          | 0.008          | 61.143         | 2.194          |
| 0.000          | 11.162         | 0.105          | 0.000          | 1.538          | 0.046          | 0.000          | 0.000          | 0.000          | 0.000          | 0.000          | 1.628          | 0.016          | 17.351         | 2.618          |
| 0.000          | 1.412          | 0.105          | 0.000          | 1.842          | 0.212          | 0.000          | 0.000          | 0.000          | 0.013          | 3.250          | 8.168          | 0.000          | 21.758         | 4.487          |
| 0.007          | 19.220         | 0.183          | 0.000          | 2.380          | 0.000          | 0.000          | 0.000          | 0.000          | 0.000          | 0.256          | 8.620          | 0.018          | 280.677        | 1.965          |
| 0.000          | 3.219          | 0.099          | 0.000          | 1.714          | 0.000          | 0.000          | 0.000          | 0.013          | 0.000          | 0.242          | 6.121          | 0.009          | 65.447         | 7.666          |
| 0.021          | 5.107          | 0.172          | 0.000          | 3.116          | 0.049          | 0.000          | 0.000          | 0.013          | 0.009          | 4.348          | 4.513          | 0.034          | 55.384         | 5.472          |
| 0.013          | 2.994          | 0.115          | 0.000          | 2.557          | 0.000          | 0.000          | 0.000          | 0.000          | 0.037          | 2.389          | 9.708          | 0.000          | 80.690         | 5.811          |
| 0.000          | 6.866          | 0.000          | 0.000          | 4.293          | 0.238          | 0.000          | 0.000          | 0.000          | 0.007          | 2.860          | 6.530          | 0.010          | 57.221         | 6.088          |
| 0.012          | 2.788          | 0.000          | 0.000          | 2.150          | 0.000          | 0.617          | 0.000          | 0.046          | 0.010          | 0.090          | 7.768          | 0.015          | 56.587         | 9.618          |
| 0.000          | 5.906          | 0.219          | 0.000          | 2.990          | 0.000          | 0.161          | 0.000          | 0.012          | 0.027          | 0.261          | 8.962          | 0.038          | 84.350         | 4.713          |
| 0.013          | 11.267         | 0.211          | 0.000          | 2.628          | 0.047          | 0.000          | 0.000          | 0.000          | 0.309          | 0.251          | 3.887          | 0.033          | 110.333        | 4.536          |
| 0.022          | 3.613          | 0.131          | 0.000          | 2.759          | 0.000          | 0.000          | 0.023          | 0.000          | 0.003          | 8.689          | 6.810          | 0.028          | 113.760        | 5.480          |
| 0.016          | 20.309         | 0.000          | 0.000          | 1.538          | 0.046          | 0.175          | 0.000          | 0.000          | 0.003          | 0.749          | 5.996          | 0.017          | 16.775         | 4.143          |
| 0.000          | 3.560          | 0.000          | 0.000          | 1.720          | 0.000          | 0.000          | 0.000          | 0.025          | 0.000          | 0.239          | 9.779          | 0.032          | 48.738         | 10.429         |
| 0.009          | 3.907          | 0.092          | 0.000          | 0.613          | 0.124          | 0.000          | 0.000          | 0.000          | 0.004          | 0.056          | 14.012         | 0.011          | 31.277         | 4.731          |
| 0.152          | 3.790          | 0.041          | 0.000          | 1.604          | 0.000          | 0.000          | 0.000          | 0.000          | 0.005          | 0.150          | 4.847          | 0.000          | 214.282        | 0.710          |
| 0.000          | 3.103          | 0.000          | 0.000          | 1.064          | 0.130          | 0.000          | 0.000          | 0.018          | 0.008          | 0.779          | 8.973          | 0.011          | 45.032         | 7.564          |
| 0.000          | 7.321          | 0.047          | 0.000          | 1.895          | 0.000          | 0.000          | 0.000          | 0.013          | 0.000          | 0.065          | 5.606          | 0.008          | 116.741        | 4.713          |
| 0.000          | 20.327         | 0.000          | 0.000          | 1.842          | 0.000          | 0.000          | 0.000          | 0.000          | 0.000          | 0.083          | 5.108          | 0.010          | 61.748         | 10.040         |
| 0.031          | 18.479         | 0.043          | 0.000          | 1.634          | 0.043          | 0.000          | 0.000          | 0.000          | 0.005          | 0.356          | 3.688          | 0.023          | 77.403         | 1.121          |
| 0.012          | 10.067         | 0.127          | 0.000          | 1.404          | 0.256          | 0.000          | 0.000          | 0.000          | 0.005          | 0.130          | 6.613          | 0.000          | 106.679        | 2.585          |
| 0.000          | 8.493          | 0.097          | 0.000          | 2.250          | 0.000          | 0.000          | 0.000          | 0.000          | 0.008          | 0.109          | 3.603          | 0.000          | 222.448        | 0.419          |
| 0.011          | 3.618          | 0.039          | 0.000          | 2.612          | 0.079          | 0.286          | 0.000          | 0.043          | 0.010          | 2.445          | 6.256          | 0.000          | 26.242         | 3.693          |
| 0.000          | 3.055          | 0.000          | 0.000          | 1.791          | 0.000          | 0.000          | 0.000          | 0.000          | 0.000          | 0.346          | 6.010          | 0.016          | 25.245         | 6.01           |

| ENSG00000264619 | ENSG00000264387 | ENSG00000264883 | ENSG00000273001 | ENSG00000272518 | ENSG00000125841 | ENSG00000196139 | ENSG00000224003 | ENSG00000132179 | ENSG00000263516 | ENSG00000165957 | ENSG00000252747 | ENSG00000299114 | ENSG00000229138 | ENSG00000220988 | ENSG0000020884 |
|-----------------|-----------------|-----------------|-----------------|-----------------|-----------------|-----------------|-----------------|-----------------|-----------------|-----------------|-----------------|-----------------|-----------------|-----------------|----------------|
| 0.000           | 32.822          | 0.037           | 0.771           | 8.253           | 32.994          | 4.651           | 0.182           | 38.413          | 0.000           | 8.748           | 0.049           | 0.000           | 0.000           | 0.157           | 0.000          |
| 0.000           | 66.562          | 0.000           | 0.801           | 5.755           | 26.488          | 1.709           | 0.129           | 37.909          | 0.000           | 10.397          | 0.135           | 0.000           | 0.000           | 0.045           | 0.000          |
| 0.000           | 96.133          | 0.056           | 0.745           | 8.790           | 18.909          | 1.160           | 0.115           | 24.208          | 0.000           | 9.191           | 0.000           | 0.000           | 0.000           | 0.000           | 0.000          |
| 0.000           | 58.623          | 0.000           | 0.330           | 8.837           | 27.085          | 0.685           | 0.248           | 20.187          | 0.000           | 9.042           | 0.115           | 0.030           | 0.000           | 0.000           | 0.000          |
| 0.000           | 102.677         | 0.000           | 0.000           | 5.143           | 11.165          | 2.629           | 0.116           | 39.780          | 0.000           | 24.922          | 0.116           | 0.000           | 0.000           | 0.000           | 0.000          |
| 0.000           | 44.627          | 0.418           | 1.033           | 10.829          | 21.520          | 1.061           | 0.390           | 24.002          | 0.000           | 5.455           | 0.129           | 0.027           | 0.011           | 0.000           | 0.000          |
| 0.000           | 37.688          | 0.000           | 0.545           | 8.781           | 31.412          | 2.222           | 0.542           | 39.376          | 0.000           | 13.123          | 0.187           | 0.000           | 0.000           | 0.044           | 0.206          |
| 0.000           | 70.962          | 0.033           | 0.922           | 6.054           | 39.082          | 3.014           | 0.287           | 49.584          | 0.000           | 14.225          | 0.055           | 0.000           | 0.000           | 0.094           | 0.000          |
| 0.000           | 74.516          | 0.038           | 0.622           | 5.022           | 31.333          | 2.412           | 0.189           | 29.706          | 0.000           | 13.136          | 0.114           | 0.037           | 0.000           | 0.000           | 0.000          |
| 0.259           | 66.880          | 0.000           | 0.517           | 8.144           | 14.623          | 5.479           | 0.413           | 50.127          | 0.000           | 20.193          | 0.037           | 0.000           | 0.000           | 0.000           | 0.000          |
| 0.000           | 47.932          | 0.000           | 0.635           | 4.905           | 25.714          | 7.860           | 0.259           | 35.487          | 0.000           | 22.136          | 0.172           | 0.000           | 0.000           | 0.011           | 0.000          |
| 0.000           | 69.368          | 0.000           | 0.921           | 9.687           | 51.135          | 1.126           | 0.105           | 27.112          | 0.000           | 4.966           | 0.094           | 0.000           | 0.000           | 0.040           | 0.000          |
| 0.000           | 52.644          | 0.146           | 0.339           | 7.131           | 40.409          | 1.180           | 0.205           | 23.857          | 0.000           | 10.637          | 0.058           | 0.000           | 0.000           | 0.000           | 0.000          |
| 0.000           | 60.323          | 0.062           | 0.508           | 9.134           | 47.934          | 0.833           | 0.169           | 27.644          | 0.000           | 8.871           | 0.054           | 0.104           | 0.011           | 0.000           | 0.000          |
| 0.000           | 62.938          | 0.000           | 0.848           | 7.357           | 47.388          | 3.857           | 0.201           | 25.500          | 0.000           | 8.494           | 0.040           | 0.000           | 0.000           | 0.000           | 0.000          |
| 0.000           | 33.166          | 0.000           | 0.413           | 9.537           | 24.999          | 2.309           | 0.101           | 39.999          | 0.000           | 8.910           | 0.109           | 0.000           | 0.000           | 0.076           | 0.000          |
| 0.000           | 76.816          | 0.000           | 0.586           | 8.923           | 35.980          | 2.516           | 0.351           | 18.588          | 0.000           | 3.782           | 0.172           | 0.000           | 0.025           | 0.000           | 0.000          |
| 0.000           | 140.460         | 0.000           | 0.739           | 3.855           | 47.889          | 9.931           | 0.046           | 48.954          | 0.000           | 21.735          | 0.037           | 0.000           | 0.256           | 0.000           | 0.000          |
| 0.000           | 55.746          | 0.000           | 0.331           | 5.988           | 48.569          | 1.394           | 0.094           | 42.390          | 0.000           | 8.709           | 0.057           | 0.000           | 0.000           | 0.041           | 0.000          |
| 0.000           | 57.585          | 0.092           | 0.707           | 8.345           | 37.556          | 0.552           | 0.075           | 28.316          | 0.000           | 7.798           | 0.020           | 0.000           | 0.000           | 0.000           | 0.000          |
| 0.000           | 126.325         | 0.000           | 0.830           | 3.471           | 27.940          | 4.478           | 0.054           | 56.793          | 0.000           | 17.517          | 0.022           | 0.031           | 0.000           | 0.000           | 0.000          |
| 0.000           | 44.271          | 0.034           | 1.403           | 11.377          | 41.703          | 1.088           | 0.249           | 27.521          | 0.000           | 4.520           | 0.122           | 0.128           | 0.040           | 0.000           | 0.000          |
| 0.000           | 47.885          | 0.000           | 0.162           | 8.284           | 35.929          | 0.773           | 0.081           | 35.584          | 0.000           | 10.919          | 0.028           | 0.027           | 0.011           | 0.000           | 0.000          |
| 0.145           | 83.922          | 0.000           | 0.397           | 7.301           | 44.992          | 1.657           | 0.128           | 29.439          | 0.234           | 10.801          | 0.041           | 0.000           | 0.000           | 0.044           | 0.204          |
| 0.000           | 51.089          | 0.000           | 0.413           | 10.097          | 46.073          | 0.676           | 0.107           | 26.483          | 0.000           | 7.284           | 0.129           | 0.000           | 0.000           | 0.000           | 0.000          |
| 0.000           | 48.427          | 0.000           | 0.255           | 6.529           | 31.508          | 0.624           | 0.108           | 33.413          | 0.000           | 11.214          | 0.057           | 0.000           | 0.000           | 0.000           | 0.000          |
| 0.000           | 105.720         | 0.000           | 0.896           | 8.587           | 39.451          | 1.485           | 0.212           | 24.303          | 0.000           | 13.339          | 0.062           | 0.000           | 0.000           | 0.000           | 0.000          |
| 0.000           | 76.041          | 0.032           | 0.744           | 6.649           | 48.421          | 2.072           | 0.291           | 22.239          | 0.000           | 12.578          | 0.149           | 0.000           | 0.013           | 0.000           | 0.000          |
| 0.000           | 109.580         | 0.032           | 0.711           | 7.443           | 33.010          | 1.695           | 0.770           | 21.754          | 0.000           | 12.885          | 0.171           | 0.062           | 0.000           | 0.000           | 0.000          |
| 0.000           | 142.141         | 0.106           | 1.139           | 7.229           | 75.291          | 0.515           | 0.164           | 26.720          | 0.000           | 14.048          | 0.000           | 0.000           | 0.011           | 0.075           | 0.000          |
| 0.000           | 59.360          | 0.028           | 0.581           | 8.422           | 53.115          | 0.634           | 0.149           | 24.334          | 0.000           | 10.923          | 0.055           | 0.000           | 0.000           | 0.039           | 0.000          |
| 0.000           | 86.204          | 0.000           | 0.927           | 6.925           | 50.786          | 2.957           | 0.109           | 34.921          | 0.000           | 11.265          | 0.062           | 0.000           | 0.000           | 0.000           | 0.000          |
| 0.000           | 75.722          | 0.031           | 0.542           | 5.958           | 46.397          | 1.852           | 0.244           | 29.595          | 0.000           | 15.795          | 0.031           | 0.000           | 0.000           | 0.000           | 0.000          |
| 0.000           | 69.176          | 0.066           | 0.687           | 8.193           | 36.682          | 0.601           | 0.108           | 32.964          | 0.000           | 12.112          | 0.022           | 0.000           | 0.000           | 0.094           | 0.000          |
| 0.000           | 67.865          | 0.030           | 1.972           | 7.259           | 64.990          | 1.220           | 0.147           | 34.049          | 0.000           | 14.308          | 0.020           | 0.000           | 0.012           | 0.000           | 0.000          |
| 0.000           | 49.736          | 0.143           | 1.190           | 9.593           | 34.513          | 3.518           | 0.059           | 17.384          | 0.000           | 7.096           | 0.349           | 0.000           | 0.000           | 0.000           | 0.000          |
| 0.000           | 100.636         | 0.171           | 0.561           | 8.815           | 37.069          | 1.399           | 0.223           | 30.838          | 0.000           | 11.541          | 0.057           | 0.000           | 0.000           | 0.000           | 0.000          |
| 0.000           | 70.603          | 0.204           | 1.336           | 8.986           | 31.243          | 1.743           | 0.084           | 29.420          | 0.000           | 17.411          | 0.086           | 0.032           | 0.000           | 0.000           | 0.000          |
| 0.082           | 61.065          | 0.175           | 2.522           | 9.554           | 27.125          | 0.905           | 0.347           | 20.232          | 0.000           | 8.501           | 0.592           | 0.000           | 0.000           | 0.050           | 0.000          |
| 0.081           | 31.653          | 0.000           | 0.728           | 8.005           | 45.037          | 0.817           | 0.273           | 31.712          | 0.000           | 17.104          | 0.370           | 0.033           | 0.000           | 0.000           | 0.000          |
| 0.000           | 63.044          | 0.030           | 1.197           | 7.412           | 58.408          | 1.250           | 0.061           | 29.552          | 0.000           | 8.521           | 0.029           | 0.000           | 0.000           | 0.000           | 0.000          |
| 0.000           | 76.490          | 0.067           | 0.555           | 7.919           | 43.200          | 0.716           | 0.120           | 27.047          | 0.000           | 11.301          | 0.301           | 0.000           | 0.000           | 0.046           | 0.000          |
| 0.000           | 55.426          | 0.000           | 0.743           | 9.364           | 33.162          | 0.267           | 0.229           | 29.994          | 0.000           | 11.126          | 0.074           | 0.000           | 0.022           | 0.079           | 0.000          |
| 0.000           | 47.972          | 0.059           | 0.856           | 7.450           | 30.339          | 0.695           | 0.147           | 24.709          | 0.000           | 10.788          | 0.147           | 0.028           | 0.000           | 0.000           | 0.195          |
| 0.000           | 55.624          | 0.000           | 1.041           | 9.499           | 43.631          | 1.875           | 0.072           | 27.802          | 0.000           | 10.499          | 0.221           | 0.000           | 0.000           | 0.000           | 0.000          |
| 0.074           | 193.518         | 0.064           | 0.592           | 8.422           | 22.494          | 0.034           | 0.131           | 29.100          | 0.000           | 16.195          | 0.158           | 0.000           | 0.013           | 0.000           | 0.000          |
| 0.000           | 61.101          | 0.032           | 0.748           | 6.337           | 25.861          | 2.165           | 0.465           | 28.460          | 0.000           | 7.162           | 0.192           | 0.031           | 0.000           | 0.046           | 0.000          |
| 0.000           | 76.539          | 0.028           | 0.714           | 8.463           | 40.374          | 0.379           | 0.012           | 28.564          | 0.000           | 9.665           | 0.028           | 0.000           | 0.000           | 0.000           | 0.000          |
| 0.000           | 51.959          | 0.000           | 0.368           | 6.567           | 45.967          | 2.866           | 0.109           | 43.860          | 0.000           | 11.101          | 0.086           | 0.032           | 0.000           | 0.036           | 0.174          |
| 0.000           | 90.789          | 0.159           | 1.787           | 7.799           | 48.991          | 5.040           | 0.022           | 46.864          | 0.000           | 12.523          | 0.141           | 0.051           | 0.021           | 0.113           | 0.000          |
| 0.000           | 62.031          | 0.000           | 0.431           | 5.981           | 35.093          | 1.980           | 0.047           | 39.885          | 0.000           | 14.104          | 0.028           | 0.000           | 0.000           | 0.000           | 0.000          |
| 0.000           | 87.793          | 0.058           | 0.472           | 6.099           | 38.093          | 1.537           | 0.084           | 36.129          | 0.000           | 15.672          | 0.096           | 0.000           | 0.012           | 0.000           | 0.000          |
| 0.000           | 62.197          | 0.000           | 0.447           | 7.107           | 51.324          | 0.522           | 0.085           | 33.034          | 0.000           | 9.860           | 0.043           | 0.000           | 0.000           | 0.037           | 0.000          |
| 0.000           | 65.190          | 0.000           | 0.463           | 6.196           | 35.162          | 0.267           | 0.229           | 29.994          | 0.000           | 11.126          | 0.074           | 0.000           | 0.022           | 0.079           | 0.000          |
| 0.000           | 83.448          | 0.000           | 0.429           | 6.058           | 23.676          | 6.860           | 0.203           | 52.281          | 0.000           | 7.953           | 0.041           | 0.000           | 0.000           | 0.000           | 0.000          |
| 0.000           | 121.127         | 0.000           | 1.493           | 6.871           | 39.812          | 0.618           | 0.189           | 32.091          | 0.000           | 13.321          | 0.020           | 0.000           | 0.000           | 0.000           | 0.000          |
| 0.000           | 40.479          | 0.000           | 0.605           | 6.029           | 42.828          | 2.289           | 0.072           | 30.554          | 0.000           | 7.377           | 0.048           | 0.000           | 0.000           | 0.000           | 0.000          |
| 0.000           | 56.019          | 0.029           | 2.236           | 8.141           | 26.795          | 0.796           | 0.178           | 38.224          | 0.000           | 7.587           | 0.057           | 0.055           | 0.000           | 0.000           | 0.000          |
| 0.000           | 59.357          | 0.054           | 0.093           | 7.396           | 38.080          | 0.739           | 0.044           | 34.629          | 0.000           | 7.378           | 0.062           | 0.000           | 0.011           | 0.114           | 0.000          |
| 0.000           | 62.672          | 0.000           | 0.368           | 6.567           | 45.967          | 2.866           | 0.109           | 43.860          | 0.000           | 11.101          | 0.086           | 0.032           | 0.000           | 0.036           | 0.174          |
| 0.000           | 84.787          | 0.049           | 0.171           | 9.289           | 38.819          | 1.029           | 0.182           | 23.074          | 0.000           | 10.458          | 0.000           | 0.000           | 0.000           | 0.000           | 0.000          |
| 0.000           | 83.941          | 0.000           | 1.575           | 11.036          | 38.973          | 1.339           | 0.475           | 10.212          | 0.000           | 6.230           | 0.221           | 0.000           | 0.144           | 0.036           | 0.000          |
| 0.064           | 62.877          | 0.000           | 0.446           | 10.101          | 41.345          | 3.940           | 0.147           | 25.054          | 0.000           | 6.804           | 0.036           | 0.000           | 0.022           | 0.039           | 0.000          |
| 0.000           | 94.794          | 0.123           | 0.853           | 7.414           | 36.925          | 1.587           | 0.088           | 32.043          | 0.000           | 12.618          | 0.010           | 0.000           | 0.000           | 0.000           | 0.000          |
| 0.000           | 75.461          | 0.000           | 0.075           | 10.259          | 49.641          | 2.264           | 0.056           | 25.546          | 0.000           | 9.463           | 0.016           | 0.000           | 0.000           | 0.000           | 0.000          |
| 0.126           | 144.360         | 0.108           | 0.250           | 7.479           | 45.007          | 1.343           | 0.022           | 23.087          | 0.000           | 10.339          | 0.036           | 0.000           | 0.000           | 0.000           | 0.000          |
| 0.000           | 97.491          | 0.000           | 0.459           | 4.838           | 68.188          | 0.244           | 0.030           | 27.438          | 0.000           | 14.853          | 0.024           | 0.000           | 0.000           | 0.000           | 0.000          |
| 0.000           | 60.552          | 0.000           | 0.222           | 7.834           | 37.193          | 0.507           | 0.100           | 29.710          | 0.000           | 13.111          | 0.000           | 0.019           | 0.068           | 0.000           | 0.000          |
| 0.000           | 125.956         | 0.038           | 0.044           | 4.821           | 34.959          | 3.376           | 0.062           | 39.792          | 0.000           | 16.371          | 0.000           | 0.000           | 0.000           | 0.000           | 0.000          |
| 0.000           | 90.586          | 0.000           | 0.639           | 6.891           | 46.136          | 1.005           | 0.034           | 28.434          | 0.000           | 9.168           | 0.018           | 0.000           | 0.011           | 0.000           | 0.000          |
| 0.000           | 61.254          | 0.000           | 0.946           | 5.353           | 45.823          | 4.467           | 0.060           | 30.629          | 0.000           | 9.843           | 0.052           | 0.000           | 0.000           | 0.000           | 0.000          |
| 0.000           | 51.191          | 0.025           | 0.820</         |                 |                 |                 |                 |                 |                 |                 |                 |                 |                 |                 |                |

| ENSG00000146424 | ENSG00000246989 | ENSG00000254929 | ENSG00000280629 | ENSG00000274066 | ENSG00000169906 | ENSG00000279752 | ENSG00000458683 | ENSG00000253030 | ENSG00000229961 | ENSG00000170471 | ENSG00000239887 | ENSG00000066427 | ENSG00000230564 | ENSG00000204422 |
|-----------------|-----------------|-----------------|-----------------|-----------------|-----------------|-----------------|-----------------|-----------------|-----------------|-----------------|-----------------|-----------------|-----------------|-----------------|
| 4.654           | 9.495           | 0.000           | 0.122           | 0.113           | 0.000           | 0.000           | 0.007           | 0.000           | 0.285           | 5.552           | 0.000           | 0.576           | 0.000           | 0.000           |
| 6.798           | 4.621           | 0.000           | 0.039           | 0.014           | 0.301           | 0.000           | 0.000           | 0.045           | 0.000           | 0.029           | 4.786           | 0.000           | 0.576           | 0.000           |
| 11.114          | 8.302           | 0.000           | 0.035           | 0.025           | 0.268           | 0.000           | 0.000           | 0.010           | 0.234           | 0.078           | 4.865           | 0.000           | 0.770           | 0.000           |
| 3.728           | 14.581          | 0.000           | 0.065           | 0.014           | 0.909           | 0.000           | 0.000           | 0.017           | 0.000           | 1.691           | 4.755           | 0.000           | 0.706           | 0.000           |
| 4.527           | 4.165           | 0.000           | 0.031           | 0.001           | 0.460           | 0.000           | 0.000           | 0.000           | 0.000           | 4.027           | 3.402           | 0.000           | 0.645           | 0.000           |
| 4.738           | 13.378          | 0.000           | 0.156           | 0.061           | 0.533           | 0.000           | 0.000           | 0.005           | 0.233           | 4.811           | 7.473           | 0.000           | 1.311           | 0.000           |
| 6.500           | 5.387           | 0.000           | 0.103           | 0.000           | 0.600           | 0.000           | 0.000           | 0.000           | 0.788           | 4.044           | 5.447           | 0.000           | 0.658           | 0.000           |
| 5.348           | 5.286           | 0.000           | 0.014           | 0.000           | 0.000           | 0.000           | 0.000           | 0.030           | 0.000           | 2.845           | 3.528           | 0.000           | 0.483           | 0.370           |
| 6.354           | 4.039           | 0.000           | 0.063           | 0.000           | 0.000           | 0.056           | 0.000           | 0.000           | 0.000           | 1.703           | 3.016           | 0.000           | 0.472           | 0.428           |
| 4.215           | 2.860           | 0.000           | 0.046           | 0.000           | 0.000           | 0.000           | 0.000           | 0.000           | 0.000           | 0.516           | 2.705           | 0.000           | 0.670           | 0.000           |
| 5.512           | 5.394           | 0.000           | 0.023           | 0.000           | 0.262           | 0.000           | 0.005           | 0.000           | 2.954           | 4.198           | 6.000           | 0.000           | 0.613           | 0.255           |
| 5.020           | 10.513          | 0.000           | 0.012           | 0.025           | 0.543           | 0.000           | 0.000           | 0.010           | 0.000           | 1.007           | 7.751           | 0.000           | 0.782           | 0.000           |
| 5.870           | 6.654           | 0.000           | 0.048           | 0.013           | 0.000           | 0.000           | 0.000           | 0.000           | 0.000           | 0.894           | 5.362           | 0.000           | 0.601           | 0.000           |
| 6.501           | 8.451           | 0.000           | 0.068           | 0.024           | 0.524           | 0.000           | 0.000           | 0.015           | 0.000           | 4.418           | 6.806           | 0.000           | 0.899           | 0.000           |
| 7.104           | 5.812           | 0.000           | 0.101           | 0.053           | 0.000           | 0.000           | 0.000           | 0.022           | 0.000           | 1.619           | 3.855           | 0.000           | 0.493           | 0.000           |
| 3.005           | 6.895           | 0.000           | 0.068           | 0.000           | 0.262           | 0.040           | 0.000           | 0.005           | 0.229           | 0.939           | 7.537           | 0.000           | 0.795           | 0.000           |
| 4.901           | 9.131           | 0.000           | 0.026           | 0.000           | 0.302           | 0.000           | 0.000           | 0.000           | 0.000           | 0.907           | 5.943           | 0.000           | 0.583           | 0.000           |
| 6.817           | 2.335           | 0.000           | 0.062           | 0.018           | 0.359           | 0.000           | 0.000           | 0.000           | 0.314           | 0.648           | 2.210           | 0.000           | 0.441           | 0.000           |
| 7.363           | 4.956           | 0.000           | 0.012           | 0.000           | 0.546           | 0.000           | 0.000           | 0.000           | 0.000           | 12.640          | 3.445           | 0.000           | 0.532           | 0.000           |
| 6.233           | 8.115           | 0.000           | 0.038           | 0.027           | 0.292           | 0.000           | 0.000           | 0.000           | 0.000           | 0.499           | 4.104           | 0.000           | 0.480           | 0.341           |
| 11.690          | 2.118           | 0.000           | 0.040           | 0.000           | 0.311           | 0.000           | 0.000           | 0.023           | 0.000           | 14.506          | 2.213           | 0.000           | 0.371           | 0.000           |
| 3.743           | 21.282          | 0.000           | 0.097           | 0.044           | 0.000           | 0.000           | 0.108           | 1.890           | 1.941           | 8.522           | 0.000           | 1.118           | 0.000           | 0.000           |
| 5.605           | 5.398           | 0.000           | 0.068           | 0.000           | 0.314           | 0.000           | 0.000           | 0.012           | 0.000           | 5.313           | 3.453           | 0.000           | 0.703           | 0.367           |
| 8.723           | 9.005           | 0.000           | 0.035           | 0.000           | 0.288           | 0.000           | 0.000           | 0.000           | 0.000           | 0.338           | 4.795           | 0.000           | 0.297           | 0.000           |
| 4.692           | 4.609           | 0.000           | 0.000           | 0.000           | 0.000           | 0.000           | 0.000           | 0.000           | 0.259           | 4.577           | 0.290           | 0.000           | 0.613           | 0.000           |
| 8.889           | 8.712           | 0.000           | 0.067           | 0.014           | 0.000           | 0.000           | 0.000           | 0.000           | 0.000           | 0.399           | 5.606           | 0.000           | 0.525           | 0.000           |
| 7.732           | 6.172           | 0.000           | 0.075           | 0.000           | 0.000           | 0.000           | 0.000           | 0.000           | 0.000           | 4.050           | 4.468           | 0.000           | 0.468           | 0.000           |
| 7.293           | 7.629           | 0.000           | 0.027           | 0.234           | 0.000           | 0.000           | 0.000           | 0.540           | 3.421           | 3.174           | 0.000           | 0.655           | 0.000           | 0.000           |
| 5.787           | 4.940           | 0.007           | 0.026           | 0.000           | 0.307           | 0.000           | 0.000           | 0.000           | 0.000           | 0.763           | 5.193           | 0.000           | 1.125           | 0.000           |
| 6.093           | 7.455           | 0.000           | 0.053           | 0.000           | 0.309           | 0.000           | 0.000           | 0.270           | 0.717           | 3.625           | 0.000           | 1.093           | 0.360           | 0.000           |
| 10.764          | 4.896           | 0.000           | 0.120           | 0.000           | 0.000           | 0.039           | 0.000           | 0.000           | 0.000           | 1.024           | 5.076           | 0.000           | 0.539           | 0.000           |
| 5.281           | 10.434          | 0.000           | 0.011           | 0.024           | 0.000           | 0.000           | 0.019           | 0.005           | 0.233           | 0.558           | 6.293           | 0.000           | 1.452           | 0.000           |
| 7.301           | 3.965           | 0.000           | 0.020           | 0.000           | 0.302           | 0.000           | 0.000           | 0.017           | 0.000           | 48.238          | 2.807           | 0.000           | 0.538           | 0.000           |
| 7.172           | 4.553           | 0.000           | 0.013           | 0.014           | 0.000           | 0.000           | 0.000           | 0.000           | 0.000           | 0.385           | 3.255           | 0.000           | 0.494           | 0.000           |
| 5.008           | 7.546           | 0.000           | 0.027           | 0.000           | 0.631           | 0.000           | 0.000           | 0.552           | 2.928           | 5.581           | 0.000           | 0.535           | 0.000           | 0.000           |
| 5.493           | 7.234           | 0.000           | 0.086           | 0.079           | 1.143           | 0.000           | 0.000           | 0.032           | 0.000           | 6.043           | 6.764           | 0.278           | 0.844           | 0.000           |
| 13.730          | 9.017           | 0.027           | 0.047           | 0.050           | 0.819           | 0.042           | 0.000           | 0.005           | 0.239           | 2.613           | 6.669           | 0.000           | 1.548           | 0.000           |
| 5.310           | 6.648           | 0.000           | 0.070           | 0.025           | 0.272           | 0.000           | 0.000           | 0.000           | 0.000           | 2.838           | 6.359           | 0.000           | 0.806           | 0.000           |
| 5.857           | 8.526           | 0.000           | 0.056           | 0.015           | 0.650           | 0.000           | 0.000           | 0.008           | 0.853           | 0.681           | 6.022           | 0.000           | 0.829           | 0.000           |
| 3.522           | 10.834          | 0.000           | 0.072           | 0.077           | 0.338           | 0.000           | 0.024           | 0.000           | 0.588           | 0.379           | 6.011           | 0.000           | 1.037           | 0.392           |
| 6.115           | 11.656          | 0.016           | 0.043           | 0.031           | 0.334           | 0.000           | 0.000           | 0.008           | 0.000           | 2.349           | 6.469           | 0.000           | 0.563           | 0.000           |
| 6.424           | 17.511          | 0.000           | 0.109           | 0.026           | 0.000           | 0.043           | 0.000           | 0.032           | 0.247           | 0.428           | 8.742           | 0.000           | 0.717           | 0.330           |
| 5.593           | 8.870           | 0.000           | 0.067           | 0.014           | 0.000           | 0.000           | 0.000           | 0.012           | 1.088           | 3.397           | 7.936           | 0.000           | 0.881           | 0.363           |
| 3.621           | 9.650           | 0.000           | 0.138           | 0.049           | 0.267           | 0.041           | 0.000           | 0.010           | 0.700           | 9.459           | 7.121           | 0.000           | 0.697           | 0.000           |
| 4.846           | 15.555          | 0.014           | 0.073           | 0.052           | 0.569           | 0.000           | 0.000           | 0.457           | 1.877           | 9.883           | 0.000           | 1.254           | 0.000           | 0.000           |
| 9.189           | 6.279           | 0.000           | 0.096           | 0.064           | 0.554           | 0.000           | 0.000           | 0.005           | 0.243           | 4.791           | 5.680           | 0.000           | 0.780           | 0.000           |
| 4.838           | 10.693          | 0.000           | 0.158           | 0.014           | 0.611           | 0.000           | 0.000           | 0.000           | 0.138           | 0.729           | 0.000           | 1.912           | 0.000           | 0.000           |
| 4.840           | 12.419          | 0.000           | 0.067           | 0.028           | 0.000           | 0.000           | 0.000           | 0.006           | 0.270           | 0.926           | 5.140           | 0.000           | 1.120           | 0.360           |
| 5.845           | 9.552           | 0.000           | 0.035           | 0.025           | 0.268           | 0.000           | 0.000           | 0.000           | 0.234           | 0.147           | 6.116           | 0.000           | 0.682           | 0.000           |
| 5.235           | 7.734           | 0.000           | 0.011           | 0.023           | 0.300           | 0.000           | 0.000           | 0.021           | 0.800           | 0.280           | 0.000           | 0.518           | 0.000           | 0.000           |
| 6.517           | 7.548           | 0.006           | 0.044           | 0.000           | 0.509           | 0.039           | 0.000           | 0.048           | 0.223           | 4.241           | 4.263           | 0.000           | 0.479           | 0.000           |
| 7.202           | 6.782           | 0.000           | 0.118           | 0.000           | 0.547           | 0.000           | 0.000           | 0.005           | 0.239           | 0.776           | 3.729           | 0.000           | 0.503           | 0.000           |
| 5.909           | 4.880           | 0.007           | 0.084           | 0.013           | 0.557           | 0.043           | 0.000           | 0.005           | 0.244           | 0.665           | 4.952           | 0.000           | 0.665           | 0.000           |
| 5.424           | 11.442          | 0.000           | 0.053           | 0.056           | 0.000           | 0.000           | 0.000           | 0.005           | 0.000           | 2.032           | 6.839           | 0.000           | 0.590           | 0.000           |
| 7.002           | 7.002           | 0.000           | 0.062           | 0.000           | 0.000           | 0.000           | 0.000           | 0.000           | 0.000           | 0.745           | 5.745           | 0.000           | 0.491           | 0.000           |
| 4.128           | 17.705          | 0.000           | 0.051           | 0.000           | 0.000           | 0.000           | 0.000           | 0.000           | 0.381           | 7.505           | 0.000           | 0.642           | 0.000           | 0.000           |
| 6.036           | 6.996           | 0.000           | 0.139           | 0.000           | 0.000           | 0.000           | 0.000           | 0.000           | 0.000           | 1.836           | 4.302           | 0.000           | 0.697           | 0.000           |
| 6.063           | 6.089           | 0.000           | 0.036           | 0.013           | 0.000           | 0.000           | 0.000           | 0.000           | 0.939           | 6.096           | 0.000           | 0.431           | 0.000           | 0.000           |
| 5.602           | 8.219           | 0.000           | 0.036           | 0.000           | 0.551           | 0.000           | 0.000           | 0.000           | 0.482           | 2.923           | 6.326           | 0.000           | 0.654           | 0.322           |
| 8.433           | 9.380           | 0.000           | 0.044           | 0.047           | 1.028           | 0.000           | 0.000           | 0.000           | 0.225           | 0.224           | 5.416           | 0.000           | 0.339           | 0.000           |
| 11.249          | 11.249          | 0.000           | 0.059           | 0.054           | 0.650           | 0.000           | 0.000           | 0.000           | 0.154           | 0.000           | 6.143           | 0.000           | 0.460           | 0.000           |
| 5.351           | 7.065           | 0.000           | 0.000           | 0.000           | 0.000           | 0.000           | 0.000           | 1.238           | 0.152           | 3.555           | 0.000           | 0.465           | 0.550           | 0.000           |
| 4.629           | 12.555          | 0.000           | 0.053           | 0.011           | 0.245           | 0.000           | 0.000           | 0.009           | 0.644           | 2.200           | 5.716           | 0.000           | 0.752           | 0.000           |
| 3.743           | 10.304          | 0.000           | 0.023           | 0.000           | 0.000           | 0.000           | 0.000           | 0.000           | 0.230           | 0.059           | 5.649           | 0.000           | 0.766           | 0.307           |
| 3.836           | 9.208           | 0.000           | 0.051           | 0.013           | 0.587           | 0.000           | 0.000           | 0.000           | 0.770           | 0.917           | 4.945           | 0.000           | 0.474           | 0.000           |
| 7.156           | 6.660           | 0.000           | 0.035           | 0.049           | 0.267           | 0.041           | 0.000           | 0.010           | 0.700           | 9.459           | 7.121           | 0.000           | 0.528           | 0.000           |
| 6.880           | 4.823           | 0.000           | 0.067           | 0.000           | 0.000           | 0.000           | 0.000           | 0.000           | 0.000           | 5.667           | 3.239           | 0.000           | 0.522           | 0.000           |
| 8.218           | 3.971           | 0.000           | 0.000           | 0.000           | 0.000           | 0.000           | 0.000           | 0.302           | 0.144           | 3.039           | 0.000           | 0.266           | 0.000           | 0.000           |
| 5.883           | 9.641           | 0.000           | 0.039           | 0.000           | 0.000           | 0.000           | 0.000           | 0.000           | 0.561           | 6.144           | 0.000           | 0.469           | 0.000           | 0.000           |
| 9.005           | 4.388           | 0.000           | 0.031           | 0.000           | 0.000           | 0.000           | 0.000           | 0.000           | 0.654           | 3.213           | 0.000           | 0.273           | 0.000           | 0.000           |
| 5.430           | 7.602           | 0.000           | 0.045           | 0.000           | 1.055           | 0.000           | 0.000           | 0.005           | 0.000           | 1.051           | 4.555           | 0.000           | 0.385           | 0.000           |
| 6.036           | 8.297           | 0.000           | 0.020           | 0.000           | 0.000           | 0.000           | 0.000           | 0.000           | 0.381           | 2.298           | 0.000           | 0.381           | 0.000           | 0.000           |
| 6.034           | 11.482          | 0.000           | 0.042           | 0.000           | 0.000           | 0.000           | 0.000           | 0.000           | 0.000           | 0.086           | 4.427           | 0.000           | 0.516           | 0.282           |
| 8.572           | 8.224           | 0.000           | 0.021           | 0.087           | 0.000           | 0.000           | 0.000           | 0.417           | 2.227           | 6.711           | 0.000           | 0.683           | 0.000           | 0.000           |
| 3.073           | 9.444           | 0.000           | 0.031           | 0.017           | 0.000           | 0.000           | 0.000           | 0.000           | 0.000           | 0.305           | 4.690           | 0.000           | 0.677           | 0.000           |
| 5.016           | 6.832           | 0.000           | 0.000           | 0.000           | 0.438           | 0.000           | 0.000           | 0.000           | 0.268           | 4.714           | 0.000           | 0.683           | 0.000           | 0.000           |
| 7.910           | 7.910           | 0.000           | 0.046           | 0.000           | 0.000           | 0.000           | 0.000           | 0.000           | 0.000           | 0.517           | 6.000           | 0.000           | 0.545           | 0.000           |
| 3.188           | 13.251          | 0.000           | 0.158           | 0.000           | 0.000           | 0.000           | 0.000           | 0.              |                 |                 |                 |                 |                 |                 |

| ENSG0000026705 | ENSG0000022703 | ENSG0000016833 | ENSG00000262141 | ENSG00000267323 | ENSG0000016435 | ENSG00000198366 | ENSG00000227679 | ENSG00000240731 | ENSG00000229782 | ENSG00000235894 | ENSG00000228367 | ENSG00000202330 | ENSG00000226165 | ENSG00000226872 | ENSG00000199121 |
|----------------|----------------|----------------|-----------------|-----------------|----------------|-----------------|-----------------|-----------------|-----------------|-----------------|-----------------|-----------------|-----------------|-----------------|-----------------|
| 0.000          | 0.000          | 0.397          | 0.158           | 0.063           | 0.089          | 64.391          | 0.000           | 4.809           | 0.067           | 0.000           | 0.000           | 29.575          | 0.283           | 0.000           | 0.675           |
| 0.000          | 0.000          | 0.031          | 0.670           | 0.027           | 0.228          | 66.942          | 0.074           | 3.107           | 0.000           | 0.000           | 0.000           | 24.455          | 0.240           | 0.000           | 0.956           |
| 0.000          | 0.000          | 0.881          | 0.596           | 0.167           | 0.086          | 85.714          | 0.022           | 5.968           | 0.152           | 0.000           | 0.000           | 30.376          | 0.250           | 0.000           | 0.170           |
| 0.000          | 0.000          | 0.124          | 0.135           | 0.054           | 0.124          | 129.876         | 0.000           | 9.125           | 0.000           | 0.000           | 0.000           | 28.100          | 0.283           | 0.000           | 0.193           |
| 0.000          | 0.000          | 0.462          | 0.325           | 0.151           | 0.026          | 86.275          | 0.000           | 5.026           | 0.000           | 0.000           | 0.000           | 42.396          | 0.315           | 0.000           | 0.215           |
| 0.000          | 0.000          | 0.018          | 0.238           | 0.119           | 0.105          | 58.374          | 0.044           | 18.912          | 0.202           | 0.000           | 0.000           | 29.250          | 0.457           | 0.000           | 0.038           |
| 0.000          | 0.000          | 0.010          | 0.401           | 0.241           | 0.073          | 55.669          | 0.025           | 11.099          | 0.057           | 0.000           | 0.000           | 19.612          | 0.360           | 0.000           | 0.573           |
| 0.000          | 0.000          | 0.097          | 0.424           | 0.085           | 0.192          | 77.026          | 0.026           | 2.014           | 0.060           | 0.000           | 0.000           | 31.384          | 0.339           | 0.000           | 0.202           |
| 0.000          | 0.000          | 1.147          | 0.491           | 0.033           | 0.196          | 114.847         | 0.000           | 4.988           | 0.278           | 0.000           | 0.000           | 32.929          | 0.538           | 0.000           | 0.000           |
| 0.000          | 0.000          | 0.073          | 1.428           | 0.191           | 0.094          | 89.512          | 0.000           | 4.065           | 0.000           | 0.000           | 0.000           | 21.480          | 0.996           | 0.000           | 0.000           |
| 0.000          | 0.000          | 0.006          | 0.070           | 0.163           | 0.065          | 69.937          | 0.065           | 1.566           | 0.099           | 0.000           | 0.000           | 26.367          | 0.315           | 0.000           | 0.334           |
| 0.000          | 0.000          | 0.009          | 0.605           | 0.146           | 0.145          | 83.114          | 0.067           | 8.074           | 0.103           | 0.000           | 0.000           | 20.551          | 0.253           | 0.000           | 0.854           |
| 0.000          | 0.000          | 0.467          | 0.375           | 0.200           | 0.319          | 70.212          | 0.000           | 6.553           | 0.053           | 0.000           | 0.000           | 25.602          | 0.374           | 0.000           | 0.178           |
| 0.000          | 0.000          | 0.187          | 0.117           | 0.422           | 0.390          | 88.910          | 0.000           | 10.405          | 0.297           | 0.000           | 0.000           | 27.981          | 0.559           | 0.000           | 1.167           |
| 0.000          | 0.000          | 0.754          | 0.521           | 0.000           | 1.818          | 82.417          | 0.000           | 3.176           | 0.000           | 0.000           | 0.000           | 44.594          | 0.623           | 0.000           | 0.743           |
| 0.000          | 0.000          | 0.036          | 0.000           | 0.084           | 0.462          | 42.794          | 0.065           | 2.996           | 0.000           | 0.000           | 0.000           | 15.348          | 0.175           | 0.000           | 0.354           |
| 0.034          | 0.000          | 0.298          | 0.135           | 0.108           | 0.109          | 119.229         | 0.025           | 5.539           | 0.057           | 0.000           | 0.000           | 25.210          | 0.081           | 0.000           | 0.152           |
| 0.000          | 0.000          | 0.012          | 0.640           | 0.193           | 0.087          | 277.978         | 0.029           | 1.888           | 0.000           | 0.000           | 0.000           | 18.855          | 1.675           | 0.000           | 0.228           |
| 0.000          | 0.000          | 0.046          | 0.609           | 0.147           | 0.043          | 112.299         | 0.000           | 5.400           | 0.103           | 0.000           | 0.000           | 28.417          | 0.328           | 0.000           | 0.522           |
| 0.000          | 0.000          | 0.119          | 0.260           | 0.026           | 0.293          | 72.655          | 0.024           | 7.839           | 0.055           | 0.000           | 0.000           | 28.739          | 0.584           | 0.000           | 0.186           |
| 0.000          | 0.000          | 4.731          | 0.694           | 0.362           | 0.036          | 191.677         | 0.026           | 2.371           | 0.118           | 0.000           | 0.000           | 54.741          | 1.204           | 0.000           | 0.198           |
| 0.000          | 0.000          | 0.000          | 0.431           | 0.230           | 0.047          | 55.670          | 0.026           | 13.308          | 0.122           | 0.000           | 0.000           | 21.092          | 0.215           | 0.000           | 0.205           |
| 0.000          | 0.000          | 0.032          | 0.421           | 0.112           | 0.080          | 107.374         | 0.052           | 7.585           | 0.238           | 0.000           | 0.000           | 24.552          | 0.671           | 0.000           | 0.200           |
| 0.000          | 0.000          | 0.009          | 0.000           | 0.072           | 0.029          | 70.626          | 0.000           | 2.377           | 0.000           | 0.000           | 0.000           | 32.478          | 0.642           | 0.000           | 0.681           |
| 0.000          | 0.000          | 0.192          | 1.062           | 0.107           | 0.736          | 85.521          | 0.000           | 5.240           | 0.000           | 0.000           | 0.000           | 25.184          | 0.079           | 0.000           | 0.000           |
| 0.000          | 0.000          | 0.021          | 0.138           | 0.083           | 0.606          | 78.991          | 0.000           | 9.773           | 0.234           | 0.000           | 0.000           | 31.061          | 0.578           | 0.000           | 0.394           |
| 0.000          | 0.000          | 0.036          | 0.000           | 0.063           | 0.126          | 91.261          | 0.000           | 9.141           | 0.000           | 0.000           | 0.000           | 34.253          | 0.061           | 0.000           | 0.559           |
| 0.000          | 0.000          | 1.189          | 1.100           | 0.165           | 0.108          | 95.529          | 0.000           | 9.819           | 0.585           | 0.000           | 0.000           | 31.623          | 0.082           | 0.000           | 0.000           |
| 0.000          | 0.000          | 0.073          | 0.411           | 0.082           | 0.260          | 123.509         | 0.025           | 15.208          | 0.058           | 0.000           | 0.000           | 49.627          | 0.614           | 0.000           | 0.586           |
| 0.000          | 0.000          | 0.032          | 0.551           | 0.304           | 0.135          | 171.668         | 0.000           | 15.631          | 0.175           | 0.000           | 0.000           | 53.874          | 0.659           | 0.000           | 0.444           |
| 0.000          | 0.000          | 0.199          | 0.113           | 0.091           | 0.040          | 122.840         | 0.042           | 3.779           | 0.096           | 0.000           | 0.000           | 53.449          | 0.745           | 0.000           | 0.000           |
| 0.000          | 0.000          | 0.344          | 0.831           | 0.143           | 0.200          | 94.008          | 0.022           | 7.824           | 0.151           | 0.000           | 0.000           | 24.131          | 0.710           | 0.000           | 0.847           |
| 0.000          | 0.000          | 0.008          | 0.000           | 0.139           | 0.115          | 107.853         | 0.025           | 9.264           | 0.178           | 0.000           | 0.000           | 59.243          | 0.248           | 0.000           | 0.344           |
| 0.000          | 0.000          | 0.193          | 0.399           | 0.053           | 0.413          | 82.463          | 0.025           | 8.773           | 0.000           | 0.000           | 0.000           | 44.918          | 0.119           | 0.000           | 0.150           |
| 0.071          | 0.000          | 0.322          | 0.844           | 0.113           | 0.749          | 66.863          | 0.000           | 8.807           | 0.239           | 0.000           | 0.000           | 26.959          | 0.168           | 0.000           | 0.000           |
| 0.000          | 0.000          | 0.058          | 0.000           | 0.077           | 0.195          | 59.593          | 0.023           | 7.564           | 0.000           | 0.000           | 0.000           | 35.944          | 0.267           | 0.000           | 0.000           |
| 0.000          | 0.000          | 0.928          | 0.000           | 0.341           | 0.098          | 53.656          | 0.045           | 21.128          | 0.103           | 0.000           | 0.000           | 27.027          | 0.764           | 0.000           | 4.341           |
| 0.000          | 0.000          | 0.083          | 0.364           | 0.292           | 0.167          | 73.861          | 0.000           | 20.162          | 0.103           | 0.000           | 0.000           | 21.018          | 0.400           | 0.000           | 0.399           |
| 0.000          | 0.000          | 1.636          | 0.680           | 0.145           | 0.076          | 86.365          | 0.000           | 5.198           | 0.431           | 0.000           | 0.000           | 27.831          | 0.380           | 0.000           | 1.561           |
| 0.000          | 0.000          | 0.065          | 0.150           | 0.120           | 0.065          | 72.677          | 0.000           | 14.878          | 0.127           | 0.000           | 0.000           | 17.982          | 0.134           | 0.000           | 1.069           |
| 0.000          | 0.000          | 0.023          | 0.298           | 0.090           | 0.075          | 64.144          | 0.055           | 9.514           | 0.126           | 0.000           | 0.000           | 30.089          | 0.223           | 0.000           | 1.276           |
| 0.000          | 0.000          | 0.019          | 0.000           | 0.101           | 0.113          | 60.556          | 0.000           | 7.376           | 0.107           | 0.000           | 0.000           | 23.729          | 0.113           | 0.000           | 0.539           |
| 0.000          | 0.000          | 0.000          | 0.139           | 0.194           | 0.073          | 136.408         | 0.026           | 8.752           | 0.000           | 0.000           | 0.000           | 30.965          | 0.373           | 0.000           | 1.187           |
| 0.000          | 0.000          | 0.016          | 0.000           | 0.119           | 0.060          | 59.753          | 0.000           | 4.245           | 0.000           | 0.000           | 0.000           | 20.833          | 0.265           | 0.000           | 0.559           |
| 0.000          | 0.000          | 0.116          | 0.253           | 0.229           | 0.094          | 102.983         | 0.023           | 17.289          | 0.000           | 0.000           | 0.000           | 23.090          | 0.227           | 0.000           | 0.181           |
| 0.000          | 0.000          | 0.085          | 0.618           | 0.149           | 0.912          | 77.558          | 0.000           | 9.754           | 0.000           | 0.000           | 0.000           | 37.519          | 0.407           | 0.000           | 0.353           |
| 0.000          | 0.000          | 0.021          | 0.408           | 0.082           | 0.080          | 68.293          | 0.050           | 17.164          | 0.116           | 0.000           | 0.000           | 34.735          | 0.692           | 0.000           | 0.971           |
| 0.000          | 0.000          | 0.137          | 0.827           | 0.138           | 0.078          | 76.274          | 0.025           | 13.840          | 0.234           | 0.000           | 0.000           | 22.996          | 0.577           | 0.000           | 0.786           |
| 0.000          | 0.000          | 0.173          | 0.597           | 0.024           | 0.485          | 73.123          | 0.088           | 8.940           | 0.096           | 0.000           | 0.000           | 34.632          | 0.322           | 0.000           | 0.341           |
| 0.000          | 0.000          | 0.008          | 0.045           | 0.909           | 0.909          | 59.721          | 0.000           | 9.742           | 0.000           | 0.000           | 0.000           | 27.900          | 0.708           | 0.000           | 0.000           |
| 0.000          | 0.000          | 0.121          | 0.681           | 0.136           | 0.074          | 97.156          | 0.000           | 6.367           | 0.433           | 0.000           | 0.000           | 40.228          | 0.339           | 0.000           | 0.488           |
| 0.000          | 0.000          | 0.009          | 0.488           | 0.098           | 0.032          | 74.349          | 0.045           | 3.026           | 0.207           | 0.000           | 0.000           | 28.601          | 0.511           | 0.000           | 0.870           |
| 0.000          | 0.000          | 0.095          | 0.124           | 0.025           | 0.358          | 109.167         | 0.023           | 3.486           | 0.105           | 0.000           | 0.000           | 33.643          | 0.409           | 0.000           | 0.355           |
| 0.000          | 0.000          | 0.042          | 0.549           | 0.198           | 0.125          | 105.894         | 0.000           | 5.804           | 0.000           | 0.000           | 0.000           | 29.765          | 0.394           | 0.000           | 0.157           |
| 0.000          | 0.000          | 0.057          | 0.276           | 0.050           | 0.155          | 103.544         | 0.000           | 10.265          | 0.000           | 0.000           | 0.000           | 35.286          | 0.544           | 0.000           | 0.268           |
| 0.000          | 0.000          | 0.883          | 0.527           | 0.211           | 0.080          | 82.968          | 0.007           | 11.565          | 0.000           | 0.000           | 0.000           | 25.894          | 0.315           | 0.000           | 0.000           |
| 0.000          | 0.000          | 0.190          | 0.393           | 0.110           | 0.114          | 74.515          | 0.048           | 9.528           | 0.056           | 0.000           | 0.000           | 40.228          | 0.352           | 0.000           | 0.042           |
| 0.000          | 0.000          | 0.011          | 0.495           | 0.074           | 0.097          | 81.385          | 0.068           | 10.311          | 0.052           | 0.000           | 0.000           | 19.733          | 0.814           | 0.000           | 0.000           |
| 0.000          | 0.000          | 0.225          | 0.246           | 0.123           | 0.035          | 73.215          | 0.023           | 5.947           | 0.104           | 0.000           | 0.000           | 23.582          | 0.257           | 0.000           | 0.175           |
| 0.000          | 0.000          | 0.201          | 0.229           | 0.115           | 0.215          | 85.148          | 0.021           | 1.725           | 0.000           | 0.000           | 0.000           | 34.582          | 0.480           | 0.000           | 0.000           |
| 0.000          | 0.000          | 0.008          | 0.044           | 0.133           | 0.104          | 83.172          | 0.000           | 8.154           | 0.232           | 0.000           | 0.000           | 28.922          | 0.473           | 0.000           | 0.627           |
| 0.000          | 0.000          | 0.048          | 0.841           | 0.295           | 0.064          | 123.319         | 0.000           | 7.866           | 0.000           | 0.000           | 0.000           | 35.630          | 0.251           | 0.000           | 0.300           |
| 0.000          | 0.000          | 0.876          | 0.219           | 0.197           | 0.088          | 68.964          | 0.020           | 13.042          | 0.186           | 0.000           | 0.000           | 29.222          | 0.458           | 0.000           | 0.156           |
| 0.000          | 0.000          | 0.805          | 0.117           | 0.165           | 0.290          | 53.096          | 0.022           | 14.939          | 0.199           | 0.000           | 0.000           | 22.458          | 0.491           | 0.000           | 1.172           |
| 0.000          | 0.000          | 8.657          | 0.765           | 0.052           | 0.080          | 98.087          | 0.024           | 5.479           | 0.055           | 0.000           | 0.000           | 39.663          | 0.430           | 0.000           | 0.373           |
| 0.000          | 0.000          | 0.293          | 0.000           | 0.135           | 0.060          | 127.742         | 0.000           | 4.265           | 0.000           | 0.000           | 0.000           | 46.881          | 0.260           | 0.000           | 0.000           |
| 0.000          | 0.000          | 0.123          | 0.922           | 0.323           | 0.050          | 221.698         | 0.085           | 5.531           | 0.098           | 0.000           | 0.000           | 68.820          | 0.414           | 0.000           | 0.329           |
| 0.000          | 0.000          | 0.258          | 0.768           | 0.246           | 0.040          | 216.293         | 0.000           | 2.563           | 0.065           | 0.000           | 0.000           | 65.567          | 0.505           | 0.000           | 0.219           |
| 0.000          | 0.000          | 0.031          | 1.021           | 0.123           | 0.058          | 107.174         | 0.038           | 6.481           | 0.000           | 0.000           | 0.000           | 34.460          | 0.244           | 0.000           | 0.000           |
| 0.000          | 0.000          | 0.025          | 0.968           | 0.162           | 0.004          | 187.335         | 0.000           | 2.100           | 0.000           | 0.000           | 0.000           | 102.011         | 0.627           | 0.000           | 0.000           |
| 0.000          | 0.000          | 0.045          | 0.588           | 0.189           | 0.108          | 94.777          | 0.043           | 2.153           | 0.349           | 0.000           | 0.000           | 39.699          | 0.598           | 0.000           | 0.000           |
| 0.000          | 0.000          | 0.000          | 0.000           | 0.045           | 0.076          | 159.234         | 0.000           | 19.924          | 0.000           | 0.000           | 0.000           | 61.169          |                 |                 |                 |

| ENSG0000119874 | ENSG0000115307 | ENSG00000653747 | ENSG0000202231 | ENSG0000267794 | ENSG0000229917 | ENSG000011943 | ENSG0000264994 | ENSG0000203620 | ENSG0000204120 | ENSG0000276770 | ENSG0000249045 | ENSG0000251443 | ENSG0000118017 | ENSG0000217860 | ENSG0000218961 |
|----------------|----------------|-----------------|----------------|----------------|----------------|---------------|----------------|----------------|----------------|----------------|----------------|----------------|----------------|----------------|----------------|
| 0.208          | 35.855         | 0.062           | 0.000          | 0.134          | 0.955          | 0.000         | 0.099          | 4.813          | 0.000          | 0.048          | 0.056          | 0.171          | 0.000          |                |                |
| 0.000          | 73.888         | 0.903           | 0.000          | 0.483          | 6.385          | 0.000         | 0.000          | 3.145          | 0.000          | 0.000          | 0.000          | 0.036          | 0.106          | 0.000          |                |
| 0.157          | 57.726         | 0.044           | 0.000          | 0.658          | 8.867          | 0.000         | 0.000          | 4.442          | 0.000          | 0.000          | 0.000          | 0.021          | 0.024          | 0.000          |                |
| 0.000          | 50.934         | 0.053           | 0.000          | 0.029          | 8.849          | 0.250         | 0.019          | 4.827          | 0.000          | 0.000          | 0.000          | 0.012          | 0.067          | 0.000          |                |
| 0.000          | 60.526         | 0.161           | 0.000          | 0.000          | 5.942          | 0.000         | 0.000          | 3.056          | 0.000          | 0.000          | 0.000          | 0.000          | 0.000          | 0.000          |                |
| 0.157          | 50.815         | 0.087           | 0.000          | 0.000          | 0.151          | 6.852         | 0.000          | 0.000          | 6.953          | 0.000          | 0.000          | 0.032          | 0.094          | 0.000          |                |
| 0.176          | 51.929         | 0.791           | 0.000          | 0.000          | 0.114          | 6.268         | 0.247          | 0.000          | 3.705          | 0.000          | 0.000          | 0.000          | 0.047          | 0.026          | 0.000          |
| 0.187          | 44.084         | 0.115           | 0.000          | 0.000          | 0.030          | 7.171         | 0.000          | 0.010          | 3.307          | 0.000          | 0.000          | 0.000          | 0.025          | 0.040          | 0.000          |
| 0.216          | 64.818         | 0.097           | 0.000          | 0.000          | 0.035          | 6.530         | 0.000          | 0.000          | 2.235          | 0.000          | 0.000          | 0.000          | 0.014          | 0.032          | 0.024          |
| 0.000          | 69.984         | 0.133           | 0.000          | 0.000          | 0.101          | 5.405         | 0.000          | 0.000          | 2.595          | 0.000          | 0.000          | 0.000          | 0.000          | 0.141          | 0.000          |
| 0.000          | 63.150         | 0.151           | 0.000          | 0.000          | 0.138          | 6.808         | 0.000          | 0.061          | 1.073          | 0.000          | 0.000          | 0.000          | 0.000          | 0.000          | 0.000          |
| 0.000          | 52.734         | 0.094           | 0.000          | 0.000          | 0.026          | 10.693        | 0.000          | 0.008          | 5.832          | 0.000          | 0.000          | 0.000          | 0.021          | 0.050          | 0.000          |
| 0.000          | 45.033         | 0.038           | 0.000          | 0.000          | 0.079          | 8.069         | 0.000          | 0.026          | 3.854          | 0.000          | 0.000          | 0.000          | 0.033          | 0.062          | 0.019          |
| 0.000          | 48.014         | 0.209           | 0.000          | 0.000          | 0.050          | 9.238         | 0.000          | 0.024          | 5.393          | 0.000          | 0.000          | 0.000          | 0.031          | 0.104          | 0.000          |
| 0.000          | 53.116         | 0.157           | 0.000          | 0.000          | 0.000          | 5.729         | 0.000          | 0.000          | 4.008          | 0.000          | 0.000          | 0.000          | 0.000          | 0.154          | 0.000          |
| 0.000          | 36.311         | 0.361           | 0.000          | 0.000          | 0.050          | 5.274         | 0.000          | 0.008          | 6.374          | 0.000          | 0.000          | 0.000          | 0.000          | 0.246          | 0.000          |
| 0.000          | 48.265         | 0.059           | 0.000          | 0.000          | 0.000          | 8.972         | 0.000          | 0.009          | 4.022          | 0.000          | 0.000          | 0.000          | 0.012          | 0.067          | 0.000          |
| 0.000          | 122.373        | 0.032           | 0.000          | 0.000          | 0.034          | 9.528         | 0.000          | 0.000          | 1.980          | 0.318          | 0.000          | 0.000          | 0.028          | 0.047          | 0.000          |
| 0.161          | 63.876         | 0.328           | 0.000          | 0.177          | 0.620          | 6.009         | 0.000          | 0.008          | 2.944          | 0.000          | 0.000          | 0.000          | 0.011          | 0.048          | 0.000          |
| 0.000          | 45.219         | 0.115           | 0.000          | 0.000          | 0.083          | 6.774         | 0.000          | 0.000          | 4.768          | 0.000          | 0.000          | 0.040          | 0.012          | 0.064          | 0.000          |
| 0.000          | 90.495         | 0.058           | 0.000          | 0.000          | 0.029          | 8.810         | 0.000          | 0.251          | 2.110          | 0.000          | 0.000          | 0.000          | 0.025          | 0.027          | 0.000          |
| 0.000          | 29.740         | 0.193           | 0.000          | 0.213          | 10.465         | 0.000         | 0.020          | 5.973          | 0.285          | 0.000          | 0.000          | 0.064          | 0.057          | 0.000          |                |
| 0.185          | 57.114         | 0.111           | 0.000          | 0.000          | 0.089          | 6.328         | 0.000          | 0.000          | 2.768          | 0.000          | 0.000          | 0.000          | 0.082          | 0.042          | 0.000          |
| 0.000          | 67.446         | 0.053           | 0.000          | 0.000          | 0.051          | 6.153         | 0.000          | 0.025          | 4.336          | 0.000          | 0.000          | 0.000          | 0.000          | 0.035          | 0.000          |
| 0.000          | 55.862         | 0.105           | 0.000          | 0.000          | 0.535          | 8.367         | 0.000          | 0.009          | 3.700          | 0.000          | 0.000          | 0.000          | 0.024          | 0.066          | 0.000          |
| 0.000          | 44.974         | 0.173           | 0.000          | 0.000          | 0.029          | 7.884         | 0.000          | 0.019          | 5.184          | 0.000          | 0.000          | 0.000          | 0.073          | 0.088          | 0.000          |
| 0.000          | 56.268         | 0.025           | 0.000          | 0.000          | 0.033          | 5.220         | 0.000          | 0.103          | 3.806          | 0.000          | 0.000          | 0.000          | 0.014          | 0.046          | 0.000          |
| 0.000          | 57.599         | 0.075           | 0.000          | 0.000          | 0.058          | 7.958         | 0.000          | 0.019          | 3.089          | 0.000          | 0.000          | 0.000          | 0.000          | 0.054          | 0.000          |
| 0.181          | 67.152         | 0.078           | 0.000          | 0.000          | 0.029          | 9.972         | 0.000          | 0.029          | 3.247          | 0.000          | 0.000          | 0.000          | 0.012          | 0.041          | 0.000          |
| 0.363          | 86.666         | 0.042           | 0.000          | 0.000          | 0.029          | 10.539        | 0.000          | 0.000          | 3.773          | 0.000          | 0.042          | 0.012          | 0.014          | 0.000          |                |
| 0.000          | 99.776         | 0.121           | 0.000          | 0.000          | 0.024          | 9.046         | 0.000          | 0.008          | 3.241          | 0.000          | 0.000          | 0.000          | 0.070          | 0.011          | 0.017          |
| 0.000          | 66.030         | 0.291           | 0.000          | 0.000          | 0.025          | 7.868         | 0.000          | 0.000          | 5.255          | 0.000          | 0.000          | 0.000          | 0.042          | 0.082          | 0.000          |
| 0.000          | 68.247         | 0.069           | 0.000          | 0.000          | 0.000          | 8.212         | 0.000          | 0.067          | 4.211          | 0.000          | 0.000          | 0.000          | 0.034          | 0.024          | 0.000          |
| 0.000          | 69.838         | 0.071           | 0.000          | 0.000          | 0.028          | 8.135         | 0.000          | 0.000          | 3.126          | 0.000          | 0.000          | 0.000          | 0.024          | 0.026          | 0.000          |
| 0.000          | 48.405         | 0.291           | 0.000          | 0.000          | 0.060          | 7.998         | 0.000          | 0.039          | 5.367          | 0.000          | 0.000          | 0.000          | 0.025          | 0.111          | 0.000          |
| 0.168          | 43.745         | 0.120           | 0.000          | 0.000          | 0.000          | 8.801         | 0.000          | 0.080          | 4.831          | 0.000          | 0.000          | 0.000          | 0.056          | 0.075          | 0.000          |
| 0.321          | 56.812         | 0.773           | 0.000          | 0.000          | 0.077          | 6.623         | 0.000          | 0.017          | 5.998          | 0.000          | 0.000          | 0.037          | 0.108          | 0.108          | 0.018          |
| 0.000          | 53.081         | 0.116           | 0.000          | 0.000          | 0.052          | 6.998         | 0.000          | 0.000          | 6.564          | 0.483          | 0.000          | 0.000          | 0.022          | 0.060          | 0.000          |
| 0.000          | 51.191         | 0.509           | 0.000          | 0.000          | 0.021          | 7.286         | 0.000          | 0.000          | 4.673          | 0.000          | 0.000          | 0.000          | 0.000          | 0.082          | 0.000          |
| 0.000          | 51.196         | 0.064           | 0.000          | 0.000          | 0.032          | 6.037         | 0.277          | 0.031          | 5.005          | 0.000          | 0.000          | 0.000          | 0.066          | 0.074          | 0.000          |
| 0.000          | 50.922         | 0.213           | 0.000          | 0.000          | 0.126          | 5.206         | 0.000          | 0.000          | 5.939          | 0.000          | 0.000          | 0.045          | 0.066          | 0.118          | 0.000          |
| 0.166          | 56.805         | 0.124           | 0.000          | 0.000          | 0.027          | 7.830         | 0.233          | 0.009          | 1.111          | 0.000          | 0.000          | 0.038          | 0.033          | 0.075          | 0.000          |
| 0.000          | 64.012         | 0.092           | 0.000          | 0.000          | 0.088          | 8.131         | 0.000          | 0.116          | 4.722          | 0.000          | 0.000          | 0.042          | 0.012          | 0.055          | 0.000          |
| 0.101          | 47.830         | 0.072           | 0.140          | 0.000          | 0.101          | 6.969         | 0.000          | 0.008          | 6.203          | 0.000          | 0.000          | 0.000          | 0.000          | 0.094          | 0.018          |
| 0.167          | 49.322         | 0.099           | 0.000          | 0.000          | 0.153          | 10.071        | 0.000          | 0.000          | 6.454          | 0.000          | 0.000          | 0.000          | 0.146          | 0.088          | 0.000          |
| 0.000          | 48.540         | 0.544           | 0.000          | 0.000          | 0.079          | 5.785         | 0.000          | 0.026          | 4.966          | 0.000          | 0.000          | 0.038          | 0.011          | 0.085          | 0.000          |
| 0.000          | 113.868        | 0.046           | 0.000          | 0.000          | 0.087          | 3.271         | 0.251          | 0.009          | 5.849          | 0.000          | 0.000          | 0.000          | 0.000          | 0.094          | 0.000          |
| 0.182          | 61.362         | 0.091           | 0.000          | 0.000          | 0.088          | 5.626         | 0.000          | 0.010          | 5.476          | 0.274          | 0.000          | 0.000          | 0.081          | 0.122          | 0.000          |
| 0.000          | 47.805         | 0.218           | 0.000          | 0.000          | 0.025          | 8.366         | 0.000          | 0.025          | 7.307          | 0.000          | 0.000          | 0.000          | 0.024          | 0.084          | 0.000          |
| 0.000          | 51.602         | 0.111           | 0.000          | 0.000          | 0.048          | 6.342         | 0.000          | 0.162          | 3.421          | 0.000          | 0.000          | 0.070          | 0.056          | 0.017          | 0.000          |
| 0.000          | 52.050         | 0.124           | 0.000          | 0.000          | 0.120          | 11.130        | 0.000          | 0.016          | 3.248          | 0.000          | 0.000          | 0.000          | 0.060          | 0.078          | 0.000          |
| 0.000          | 55.907         | 0.092           | 0.000          | 0.000          | 0.078          | 7.178         | 0.000          | 0.085          | 3.660          | 0.000          | 0.000          | 0.000          | 0.043          | 0.120          | 0.000          |
| 0.000          | 61.820         | 0.078           | 0.000          | 0.000          | 0.079          | 7.781         | 0.000          | 0.009          | 3.838          | 0.000          | 0.000          | 0.000          | 0.033          | 0.159          | 0.000          |
| 0.000          | 53.127         | 0.061           | 0.000          | 0.000          | 0.070          | 10.770        | 0.000          | 0.008          | 5.399          | 0.000          | 0.000          | 0.000          | 0.029          | 0.163          | 0.000          |
| 0.000          | 61.125         | 0.129           | 0.000          | 0.000          | 0.126          | 10.388        | 0.000          | 0.000          | 3.146          | 0.000          | 0.000          | 0.000          | 0.000          | 0.046          | 0.000          |
| 0.000          | 63.806         | 0.067           | 0.000          | 0.000          | 0.112          | 6.225         | 0.000          | 0.000          | 5.872          | 0.000          | 0.000          | 0.000          | 0.047          | 0.000          | 0.000          |
| 0.000          | 55.861         | 0.097           | 0.000          | 0.000          | 0.167          | 7.955         | 0.483          | 0.009          | 4.031          | 0.000          | 0.000          | 0.000          | 0.070          | 0.129          | 0.020          |
| 0.000          | 55.444         | 0.152           | 0.000          | 0.000          | 0.236          | 5.754         | 0.228          | 0.000          | 3.684          | 0.000          | 0.000          | 0.000          | 0.044          | 0.098          | 0.000          |
| 0.324          | 37.512         | 0.188           | 0.000          | 0.000          | 0.078          | 5.251         | 0.000          | 0.009          | 5.638          | 0.000          | 0.000          | 0.000          | 0.033          | 0.097          | 0.000          |
| 0.000          | 53.724         | 0.061           | 0.000          | 0.000          | 0.097          | 7.422         | 0.000          | 0.000          | 6.306          | 0.000          | 0.000          | 0.000          | 0.000          | 0.045          | 0.000          |
| 0.000          | 57.710         | 0.240           | 0.000          | 0.000          | 0.112          | 6.156         | 0.000          | 0.000          | 6.433          | 0.000          | 0.000          | 0.000          | 0.022          | 0.062          | 0.000          |
| 0.000          | 78.872         | 0.085           | 0.000          | 0.000          | 0.000          | 7.143         | 0.388          | 0.029          | 5.535          | 0.000          | 0.000          | 0.000          | 0.037          | 0.083          | 0.031          |
| 0.144          | 42.549         | 0.177           | 0.000          | 0.000          | 0.255          | 6.041         | 0.000          | 0.030          | 4.960          | 0.000          | 0.000          | 0.000          | 0.039          | 0.043          | 0.016          |
| 0.155          | 57.922         | 1.861           | 0.000          | 0.000          | 0.473          | 4.889         | 0.000          | 0.033          | 5.735          | 0.000          | 0.000          | 0.000          | 0.073          | 0.023          | 0.000          |
| 0.000          | 63.709         | 0.287           | 0.000          | 0.000          | 0.055          | 8.316         | 0.000          | 0.000          | 5.062          | 0.000          | 0.000          | 0.000          | 0.012          | 0.090          | 0.000          |
| 0.000          | 51.780         | 0.072           | 0.000          | 0.000          | 0.143          | 6.969         | 0.000          | 0.000          | 6.270          | 0.000          | 0.000          | 0.000          | 0.000          | 0.045          | 0.000          |
| 0.000          | 70.255         | 0.029           | 0.000          | 0.000          | 0.049          | 10.294        | 0.000          | 0.016          | 2.627          | 0.000          | 0.000          | 0.000          | 0.000          | 0.046          | 0.000          |
| 0.000          | 94.091         | 0.136           | 0.000          | 0.000          | 0.033          | 11.331        | 0.000          | 0.011          | 2.179          | 0.000          | 0.000          | 0.000          | 0.000          | 0.076          | 0.000          |
| 0.000          | 68.107         | 0.111           | 0.000          | 0.000          | 0.043          | 7.759         | 0.000          | 0.000          | 5.764          | 0.000          | 0.000          | 0.000          | 0.000          | 0.262          | 0.000          |
| 0.000          | 78.739         | 0.101           | 0.000          | 0.000          | 0.068          | 7.184         | 0.000          | 0.034          | 2.600          | 0.000          | 0.000          | 0.000          | 0.029          | 0.048          | 0.000          |
| 0.000          | 54.458         | 0.085           | 0.000          | 0.000          | 0.100          | 7.623         | 0.000          | 0.000          | 4.217          | 0.000          | 0.000          | 0.000          | 0.000          | 0.116          | 0.000          |
| 0.000          | 51.164         | 0.144           | 0.000          | 0.000          | 0.050          | 6.231         | 0.000          | 0.000          | 6.231          | 0.000          | 0.000          | 0.000          | 0.021          | 0.044          | 0.000          |
| 0.000          | 46.101         | 0.090           | 0.000          | 0.000          | 0.069          | 7.135         | 0.000          | 0.015          | 3.744          | 0.000          | 0.000          | 0.000          |                |                |                |

| ENSG0000255134 | ENSG0000182545 | ENSG0000175319 | ENSG0000226957 | ENSG0000011021 | ENSG0000229090 | ENSG0000126238 | ENSG0000139180 | ENSG0000175701 | ENSG0000254309 | ENSG0000176791 | ENSG0000252365 | ENSG0000227458 | ENSG0000162694 | ENSG0000234693 | ENSG0000140673 |
|----------------|----------------|----------------|----------------|----------------|----------------|----------------|----------------|----------------|----------------|----------------|----------------|----------------|----------------|----------------|----------------|
| 0.000          | 0.206          | 0.055          | 0.114          | 91.354         | 0.052          | 28.688         | 3.285          | 5.206          | 0.000          | 0.944          | 0.166          | 0.100          | 8.827          | 0.000          | 0.356          |
| 0.000          | 0.070          | 0.000          | 0.000          | 91.115         | 0.000          | 10.922         | 3.469          | 4.485          | 0.000          | 1.606          | 0.129          | 0.170          | 7.243          | 0.022          | 0.088          |
| 0.000          | 0.156          | 0.000          | 0.115          | 93.655         | 0.031          | 52.043         | 5.016          | 1.568          | 0.000          | 0.311          | 0.230          | 0.000          | 7.614          | 0.000          | 0.238          |
| 0.000          | 0.071          | 0.000          | 0.163          | 118.208        | 0.035          | 34.172         | 2.753          | 1.919          | 0.000          | 0.200          | 0.178          | 0.000          | 9.125          | 0.044          | 0.737          |
| 0.020          | 0.046          | 0.000          | 0.000          | 96.077         | 0.000          | 28.914         | 4.765          | 7.966          | 0.000          | 8.522          | 0.164          | 0.000          | 5.166          | 0.026          | 0.028          |
| 0.000          | 0.016          | 0.000          | 0.172          | 65.218         | 0.031          | 31.752         | 4.768          | 0.756          | 0.000          | 0.331          | 0.604          | 0.000          | 8.538          | 0.019          | 0.148          |
| 0.000          | 0.053          | 0.000          | 0.227          | 127.175        | 0.000          | 12.402         | 4.388          | 6.510          | 0.000          | 1.849          | 0.235          | 0.085          | 11.109         | 0.240          | 0.050          |
| 0.000          | 0.167          | 0.000          | 0.000          | 90.838         | 0.019          | 11.587         | 4.759          | 4.460          | 0.000          | 0.438          | 0.174          | 0.000          | 4.706          | 0.046          | 0.253          |
| 0.000          | 0.107          | 0.000          | 0.079          | 78.561         | 0.000          | 34.297         | 5.850          | 7.093          | 0.000          | 0.281          | 0.100          | 0.104          | 11.513         | 0.000          | 0.277          |
| 0.000          | 0.062          | 0.000          | 0.000          | 85.194         | 0.000          | 10.858         | 5.048          | 5.100          | 0.000          | 1.609          | 0.417          | 0.303          | 5.657          | 0.155          | 0.056          |
| 0.000          | 0.095          | 0.000          | 0.000          | 84.449         | 0.046          | 17.420         | 4.265          | 4.371          | 0.000          | 2.870          | 0.164          | 0.000          | 6.952          | 0.000          | 0.044          |
| 0.000          | 0.111          | 0.000          | 0.117          | 115.978        | 0.048          | 23.972         | 3.928          | 6.140          | 0.000          | 0.287          | 0.127          | 0.000          | 8.739          | 0.020          | 0.958          |
| 0.000          | 0.114          | 0.000          | 0.091          | 96.497         | 0.082          | 24.643         | 3.901          | 2.468          | 0.000          | 0.356          | 0.263          | 0.000          | 9.318          | 0.061          | 1.759          |
| 0.000          | 0.183          | 0.000          | 0.085          | 110.104        | 0.015          | 18.042         | 3.124          | 3.409          | 0.000          | 1.012          | 0.246          | 0.000          | 7.758          | 0.019          | 0.500          |
| 0.000          | 0.068          | 0.000          | 0.252          | 84.406         | 0.068          | 16.355         | 3.955          | 2.524          | 0.000          | 1.173          | 0.000          | 0.331          | 7.916          | 0.000          | 0.196          |
| 0.000          | 0.184          | 0.000          | 0.000          | 104.439        | 0.031          | 9.760          | 2.371          | 4.051          | 0.000          | 1.165          | 0.164          | 0.000          | 3.619          | 0.000          | 0.371          |
| 0.000          | 0.141          | 0.047          | 0.000          | 112.488        | 0.053          | 37.357         | 4.162          | 3.339          | 0.000          | 0.240          | 0.095          | 0.088          | 9.944          | 0.000          | 0.488          |
| 0.027          | 0.063          | 0.000          | 0.000          | 72.832         | 0.063          | 35.932         | 20.045         | 1.945          | 0.000          | 2.174          | 0.281          | 0.000          | 11.349         | 0.052          | 0.056          |
| 0.000          | 0.000          | 0.000          | 0.029          | 66.507         | 0.064          | 14.938         | 5.714          | 4.340          | 0.000          | 0.405          | 0.171          | 0.000          | 6.761          | 0.020          | 0.905          |
| 0.000          | 0.136          | 0.000          | 0.032          | 107.794        | 0.017          | 19.515         | 6.282          | 4.910          | 0.000          | 0.085          | 0.171          | 0.000          | 6.428          | 0.000          | 0.070          |
| 0.000          | 0.018          | 0.000          | 0.000          | 100.581        | 0.018          | 28.129         | 11.123         | 5.363          | 0.000          | 2.594          | 0.097          | 0.000          | 11.005         | 0.023          | 0.307          |
| 0.000          | 0.151          | 0.000          | 0.000          | 97.787         | 0.016          | 30.166         | 7.385          | 5.162          | 0.000          | 0.162          | 0.491          | 0.000          | 9.979          | 0.000          | 0.189          |
| 0.000          | 0.018          | 0.000          | 0.034          | 92.697         | 0.037          | 39.180         | 8.885          | 2.235          | 0.000          | 1.031          | 0.200          | 0.089          | 7.578          | 0.046          | 0.171          |
| 0.000          | 0.062          | 0.000          | 0.029          | 137.032        | 0.000          | 14.248         | 4.372          | 5.042          | 0.000          | 2.561          | 0.125          | 0.000          | 7.787          | 0.058          | 0.283          |
| 0.000          | 0.139          | 0.000          | 0.000          | 99.498         | 0.017          | 17.737         | 3.550          | 5.584          | 0.000          | 0.347          | 0.151          | 0.084          | 6.586          | 0.043          | 0.390          |
| 0.000          | 0.361          | 0.000          | 0.100          | 112.870        | 0.018          | 18.795         | 4.129          | 7.950          | 0.076          | 1.556          | 0.169          | 0.000          | 7.230          | 0.000          | 0.419          |
| 0.000          | 0.000          | 0.000          | 0.000          | 84.917         | 0.000          | 27.760         | 3.862          | 4.862          | 0.000          | 5.688          | 0.086          | 0.000          | 10.733         | 0.102          | 0.173          |
| 0.000          | 0.108          | 0.000          | 0.067          | 100.382        | 0.072          | 28.431         | 3.928          | 4.030          | 0.000          | 0.245          | 0.127          | 0.000          | 7.983          | 0.044          | 0.262          |
| 0.000          | 0.108          | 0.000          | 0.099          | 83.756         | 0.000          | 21.461         | 4.633          | 6.161          | 0.000          | 0.845          | 0.420          | 0.000          | 9.921          | 0.268          | 0.155          |
| 0.000          | 0.108          | 0.000          | 0.167          | 92.571         | 0.018          | 21.220         | 5.938          | 2.298          | 0.000          | 0.221          | 0.350          | 0.000          | 7.766          | 0.067          | 0.165          |
| 0.000          | 0.193          | 0.000          | 0.027          | 87.665         | 0.015          | 21.366         | 5.802          | 5.277          | 0.000          | 0.759          | 0.109          | 0.000          | 9.170          | 0.018          | 0.320          |
| 0.000          | 0.016          | 0.042          | 0.086          | 82.340         | 0.000          | 19.974         | 3.313          | 3.486          | 0.000          | 1.014          | 0.312          | 0.000          | 7.192          | 0.039          | 3.004          |
| 0.000          | 0.023          | 0.000          | 0.000          | 86.111         | 0.000          | 17.321         | 4.866          | 4.866          | 0.000          | 0.254          | 0.266          | 0.000          | 9.579          | 0.157          | 0.138          |
| 0.000          | 0.070          | 0.000          | 0.032          | 78.869         | 0.035          | 19.928         | 5.677          | 8.950          | 0.000          | 0.237          | 0.082          | 0.000          | 7.217          | 0.043          | 0.081          |
| 0.000          | 0.294          | 0.000          | 0.000          | 152.633        | 0.111          | 21.765         | 3.624          | 12.352         | 0.000          | 1.034          | 0.197          | 0.000          | 8.539          | 0.000          | 0.291          |
| 0.000          | 0.050          | 0.000          | 0.031          | 126.531        | 0.033          | 20.747         | 3.914          | 7.631          | 0.000          | 4.193          | 0.145          | 0.000          | 7.699          | 0.124          | 0.024          |
| 0.000          | 0.223          | 0.043          | 0.059          | 79.797         | 0.000          | 34.200         | 2.270          | 2.801          | 0.000          | 6.378          | 0.395          | 0.000          | 8.040          | 0.059          | 0.718          |
| 0.000          | 0.048          | 0.000          | 0.059          | 100.899        | 0.016          | 24.807         | 3.864          | 1.211          | 0.000          | 0.303          | 0.351          | 0.000          | 12.185         | 0.000          | 0.089          |
| 0.000          | 0.310          | 0.040          | 0.000          | 113.298        | 0.038          | 33.237         | 4.833          | 5.383          | 0.000          | 0.292          | 0.343          | 0.000          | 11.447         | 0.000          | 0.637          |
| 0.000          | 0.157          | 0.052          | 0.072          | 118.754        | 0.020          | 29.068         | 4.109          | 6.557          | 0.000          | 0.231          | 0.210          | 0.000          | 10.626         | 0.000          | 0.591          |
| 0.025          | 0.039          | 0.000          | 0.072          | 117.249        | 0.020          | 30.013         | 6.218          | 9.871          | 0.000          | 2.360          | 0.196          | 0.000          | 10.075         | 0.097          | 0.063          |
| 0.000          | 0.379          | 0.000          | 0.000          | 124.466        | 0.000          | 21.962         | 3.841          | 17.942         | 0.000          | 4.519          | 0.077          | 0.000          | 8.037          | 0.041          | 0.320          |
| 0.000          | 0.091          | 0.000          | 0.101          | 142.429        | 0.055          | 12.156         | 5.230          | 2.348          | 0.076          | 0.271          | 0.219          | 0.000          | 11.400         | 0.000          | 0.290          |
| 0.000          | 0.076          | 0.000          | 0.144          | 136.946        | 0.076          | 25.997         | 3.217          | 4.729          | 0.000          | 1.227          | 0.261          | 0.000          | 11.228         | 0.039          | 0.249          |
| 0.000          | 0.099          | 0.000          | 0.184          | 129.906        | 0.033          | 30.599         | 8.853          | 2.586          | 0.000          | 2.443          | 0.222          | 0.000          | 11.139         | 0.021          | 0.721          |
| 0.000          | 0.210          | 0.000          | 0.000          | 82.893         | 0.032          | 33.629         | 3.702          | 2.711          | 0.000          | 0.301          | 0.282          | 0.000          | 7.182          | 0.040          | 0.195          |
| 0.000          | 0.000          | 0.000          | 0.263          | 65.080         | 0.018          | 19.627         | 5.744          | 1.787          | 0.000          | 1.784          | 0.322          | 0.000          | 24.475         | 0.044          | 0.061          |
| 0.000          | 0.036          | 0.000          | 0.133          | 86.144         | 0.000          | 31.851         | 2.329          | 4.419          | 0.000          | 0.229          | 0.254          | 0.000          | 8.975          | 0.000          | 0.557          |
| 0.000          | 0.141          | 0.000          | 0.029          | 137.185        | 0.063          | 23.402         | 5.180          | 5.830          | 0.000          | 1.254          | 0.105          | 0.000          | 10.862         | 0.009          | 0.351          |
| 0.000          | 0.040          | 0.000          | 0.067          | 92.349         | 0.074          | 18.801         | 3.928          | 4.030          | 0.000          | 0.188          | 0.368          | 0.143          | 8.752          | 0.000          | 0.469          |
| 0.000          | 0.119          | 0.000          | 0.027          | 138.299        | 0.060          | 25.634         | 5.267          | 7.224          | 0.000          | 0.464          | 0.219          | 0.000          | 9.505          | 0.000          | 0.184          |
| 0.000          | 0.463          | 0.000          | 0.000          | 104.303        | 0.016          | 17.191         | 4.511          | 8.829          | 0.000          | 2.894          | 0.331          | 0.000          | 6.140          | 0.000          | 0.883          |
| 0.000          | 0.081          | 0.000          | 0.030          | 148.542        | 0.033          | 37.511         | 6.234          | 5.069          | 0.000          | 5.981          | 0.218          | 0.000          | 13.698         | 0.000          | 0.155          |
| 0.000          | 0.144          | 0.000          | 0.027          | 129.005        | 0.043          | 23.660         | 4.007          | 5.513          | 0.000          | 0.313          | 0.115          | 0.000          | 8.039          | 0.018          | 0.330          |
| 0.000          | 0.053          | 0.000          | 0.000          | 137.630        | 0.000          | 38.724         | 4.572          | 6.323          | 0.000          | 0.372          | 0.202          | 0.000          | 10.564         | 0.000          | 0.269          |
| 0.000          | 0.069          | 0.000          | 0.255          | 97.740         | 0.069          | 31.749         | 2.920          | 3.097          | 0.000          | 0.344          | 0.185          | 0.000          | 16.571         | 0.000          | 0.136          |
| 0.000          | 0.068          | 0.000          | 0.095          | 101.523        | 0.034          | 15.286         | 4.793          | 9.995          | 0.000          | 0.109          | 0.321          | 0.000          | 6.954          | 0.043          | 0.154          |
| 0.000          | 0.162          | 0.000          | 0.179          | 76.677         | 0.000          | 31.916         | 7.031          | 3.748          | 0.000          | 0.689          | 0.238          | 0.000          | 13.929         | 0.020          | 0.855          |
| 0.000          | 0.096          | 0.000          | 0.000          | 135.353        | 0.065          | 21.595         | 3.258          | 6.168          | 0.000          | 1.137          | 0.129          | 0.000          | 8.739          | 0.040          | 1.664          |
| 0.000          | 0.000          | 0.000          | 0.028          | 137.717        | 0.030          | 31.580         | 6.046          | 1.187          | 0.000          | 7.132          | 0.191          | 0.000          | 11.986         | 0.037          | 0.024          |
| 0.000          | 0.095          | 0.000          | 0.000          | 142.598        | 0.038          | 33.237         | 4.833          | 5.383          | 0.000          | 0.292          | 0.343          | 0.000          | 9.293          | 0.100          | 0.000          |
| 0.000          | 0.028          | 0.000          | 0.254          | 102.488        | 0.055          | 35.717         | 6.193          | 2.206          | 0.000          | 1.671          | 0.240          | 0.000          | 10.084         | 0.034          | 0.069          |
| 0.000          | 0.100          | 0.000          | 0.132          | 127.884        | 0.014          | 16.816         | 4.565          | 2.098          | 0.000          | 0.195          | 0.355          | 0.000          | 7.226          | 0.018          | 0.062          |
| 0.000          | 0.046          | 0.000          | 0.227          | 91.675         | 0.015          | 21.432         | 2.488          | 1.905          | 0.000          | 1.891          | 0.185          | 0.000          | 8.537          | 0.038          | 0.615          |
| 0.000          | 0.068          | 0.000          | 0.000          | 156.745        | 0.034          | 32.707         | 4.729          | 2.415          | 0.000          | 4.220          | 0.115          | 0.000          | 11.601         | 0.000          | 0.867          |
| 0.000          | 0.121          | 0.000          | 0.000          | 71.821         | 0.000          | 25.997         | 3.217          | 4.729          | 0.000          | 1.227          | 0.261          | 0.000          | 11.228         | 0.039          | 0.249          |
| 0.000          | 0.109          | 0.000          | 0.000          | 160.825        | 0.000          | 48.312         | 5.523          | 2.290          | 0.000          | 0.219          | 0.121          | 0.000          | 8.601          | 0.000          | 0.623          |
| 0.000          | 0.101          | 0.000          | 0.000          | 100.704        | 0.000          | 25.543         | 7.748          | 0.835          | 0.000          | 0.611          | 0.242          | 0.000          | 10.925         | 0.000          | 0.683          |
| 0.000          | 0.107          | 0.000          | 0.049          | 109.899        | 0.054          | 23.445         | 6.038          | 0.493          | 0.000          | 0.061          | 0.197          | 0.000          | 11.688         | 0.067          | 0.178          |
| 0.000          | 0.021          | 0.000          | 0.000          | 137.267        | 0.042          | 31.243         | 7.551          | 0.632          | 0.000          | 1.618          | 0.198          | 0.103          | 9.518          | 0.026          | 0.915          |
| 0.020          | 0.077          | 0.041          | 0.028          | 113.693        | 0.031          | 25.094         | 5.141          | 11.755         | 0.000          | 2.665          | 0.113          | 0.000          | 8.696          | 0.000          | 0.155          |
| 0.000          | 0.085          | 0.000          | 0.000          | 89.727         | 0.025          | 34.169         | 6.782          | 4.862          | 0.000          | 0.332          | 0.33           |                |                |                |                |

| ENSG0000018787 | ENSG00000227018 | ENSG00000243364 | ENSG00000104863 | ENSG00000177465 | ENSG00000136715 | ENSG00000226854 | ENSG00000254203 | ENSG00000299886 | ENSG00000184847 | ENSG00000112081 | ENSG00000145198 | ENSG00000222004 | ENSG00000263958 | ENSG00000259378 | ENSG00000234272 |
|----------------|-----------------|-----------------|-----------------|-----------------|-----------------|-----------------|-----------------|-----------------|-----------------|-----------------|-----------------|-----------------|-----------------|-----------------|-----------------|
| 0.000          | 0.121           | 1.548           | 3.290           | 0.616           | 7.901           | 0.000           | 0.000           | 0.000           | 0.029           | 24.645          | 0.574           | 0.000           | 3.847           | 1.378           | 0.000           |
| 0.000          | 0.083           | 4.965           | 4.141           | 0.517           | 5.423           | 0.000           | 0.000           | 0.000           | 0.435           | 34.836          | 0.268           | 0.000           | 0.079           | 0.628           | 0.072           |
| 0.000          | 0.018           | 2.951           | 3.846           | 0.634           | 11.316          | 0.000           | 0.000           | 0.000           | 0.076           | 67.323          | 0.562           | 0.000           | 50.017          | 0.707           | 0.000           |
| 0.000          | 0.021           | 2.167           | 5.616           | 0.422           | 9.869           | 0.000           | 0.000           | 0.000           | 0.093           | 47.533          | 0.544           | 0.021           | 0.119           | 2.194           | 0.000           |
| 0.000          | 0.003           | 3.270           | 2.000           | 1.679           | 6.453           | 0.000           | 0.000           | 0.000           | 0.144           | 23.353          | 0.247           | 0.018           | 0.000           | 0.000           | 0.000           |
| 0.000          | 0.073           | 1.447           | 3.556           | 0.625           | 12.651          | 0.000           | 0.000           | 0.000           | 0.255           | 140.062         | 0.673           | 0.009           | 3.458           | 1.632           | 0.152           |
| 0.000          | 0.021           | 5.836           | 3.402           | 0.791           | 9.082           | 0.000           | 0.000           | 0.000           | 0.514           | 32.597          | 0.088           | 0.010           | 0.000           | 0.877           | 0.144           |
| 0.000          | 0.065           | 2.937           | 5.855           | 1.401           | 5.710           | 0.000           | 0.000           | 0.000           | 0.091           | 23.881          | 1.644           | 0.000           | 0.915           | 2.694           | 0.382           |
| 0.000          | 0.101           | 2.825           | 4.452           | 0.902           | 5.307           | 0.000           | 0.000           | 0.000           | 0.015           | 40.993          | 0.376           | 0.013           | 16.633          | 3.113           | 0.000           |
| 0.000          | 0.000           | 4.496           | 3.666           | 1.866           | 5.024           | 0.000           | 0.000           | 0.000           | 0.131           | 30.180          | 0.196           | 0.037           | 0.280           | 1.040           | 0.257           |
| 0.000          | 0.090           | 4.201           | 1.745           | 5.815           | 10.167          | 0.000           | 0.000           | 0.000           | 0.144           | 23.452          | 0.247           | 0.018           | 0.756           | 1.762           | 0.000           |
| 0.000          | 0.093           | 1.655           | 3.957           | 0.660           | 11.295          | 0.000           | 0.000           | 0.000           | 0.017           | 31.309          | 1.350           | 0.019           | 0.890           | 1.587           | 0.261           |
| 0.000          | 0.058           | 3.400           | 5.101           | 0.374           | 9.551           | 0.000           | 0.000           | 0.000           | 0.034           | 34.155          | 0.421           | 0.000           | 0.000           | 4.600           | 0.135           |
| 0.000          | 0.090           | 2.570           | 5.346           | 0.427           | 11.298          | 0.000           | 0.000           | 0.000           | 0.011           | 30.596          | 0.867           | 0.018           | 0.172           | 4.412           | 0.000           |
| 0.000          | 0.160           | 2.653           | 3.077           | 1.453           | 9.269           | 0.000           | 0.000           | 0.000           | 0.119           | 28.830          | 1.763           | 0.000           | 0.765           | 5.037           | 0.281           |
| 0.000          | 0.126           | 2.776           | 1.634           | 0.653           | 7.544           | 0.000           | 0.000           | 0.000           | 0.043           | 16.723          | 0.700           | 0.006           | 0.004           | 0.620           | 0.000           |
| 0.000          | 0.062           | 1.906           | 5.205           | 1.457           | 10.994          | 0.000           | 0.000           | 0.000           | 0.092           | 43.922          | 0.708           | 0.010           | 0.000           | 1.852           | 0.000           |
| 0.000          | 0.000           | 3.482           | 11.440          | 0.628           | 5.574           | 0.000           | 0.000           | 0.000           | 0.022           | 63.428          | 0.396           | 0.000           | 7.906           | 8.444           | 0.000           |
| 0.000          | 0.019           | 6.708           | 4.593           | 0.559           | 6.770           | 0.000           | 0.000           | 0.000           | 0.011           | 23.033          | 0.310           | 0.000           | 0.143           | 5.171           | 0.000           |
| 0.000          | 0.080           | 5.115           | 3.219           | 0.459           | 10.313          | 0.017           | 0.000           | 0.000           | 0.000           | 28.520          | 0.288           | 0.030           | 0.000           | 1.951           | 0.070           |
| 0.000          | 0.043           | 5.487           | 10.394          | 1.522           | 4.471           | 0.000           | 0.000           | 0.133           | 0.019           | 55.129          | 0.711           | 0.000           | 1.918           | 3.900           | 0.000           |
| 0.000          | 0.110           | 1.108           | 5.179           | 0.754           | 16.167          | 0.000           | 0.000           | 0.000           | 0.046           | 28.072          | 3.087           | 0.011           | 5.611           | 0.269           | 0.155           |
| 0.000          | 0.022           | 2.214           | 6.580           | 0.951           | 6.700           | 0.018           | 0.000           | 0.000           | 0.170           | 56.756          | 0.972           | 0.022           | 0.371           | 2.455           | 0.000           |
| 0.000          | 0.037           | 4.093           | 3.269           | 0.460           | 8.972           | 0.000           | 0.000           | 0.000           | 0.812           | 28.663          | 0.157           | 0.000           | 0.035           | 0.037           | 0.000           |
| 0.000          | 0.082           | 3.500           | 4.912           | 0.689           | 7.886           | 0.000           | 0.074           | 0.000           | 0.079           | 33.191          | 0.342           | 0.010           | 0.117           | 1.451           | 0.000           |
| 0.000          | 0.043           | 2.592           | 3.784           | 0.263           | 11.700          | 0.000           | 0.000           | 0.000           | 0.044           | 30.708          | 0.549           | 0.084           | 5.887           | 0.905           | 0.149           |
| 0.000          | 0.048           | 8.523           | 4.504           | 0.770           | 7.867           | 0.000           | 0.000           | 0.000           | 0.079           | 27.602          | 0.300           | 0.012           | 2.709           | 2.535           | 0.169           |
| 0.000          | 0.000           | 1.676           | 4.921           | 0.603           | 9.567           | 0.000           | 0.000           | 0.000           | 0.031           | 39.311          | 0.355           | 0.000           | 0.298           | 0.282           | 0.148           |
| 0.000          | 0.042           | 4.495           | 10.009          | 0.583           | 7.444           | 0.000           | 0.000           | 0.000           | 0.106           | 30.943          | 1.006           | 0.021           | 0.081           | 3.976           | 0.000           |
| 0.000          | 0.021           | 2.448           | 11.251          | 0.787           | 8.877           | 0.018           | 0.000           | 0.000           | 0.013           | 45.390          | 1.204           | 0.000           | 0.243           | 3.010           | 0.000           |
| 0.000          | 0.017           | 4.113           | 3.592           | 0.746           | 8.921           | 0.014           | 0.000           | 0.000           | 0.021           | 44.222          | 0.871           | 0.026           | 9.561           | 4.102           | 0.000           |
| 0.000          | 0.018           | 2.996           | 5.009           | 0.300           | 9.378           | 0.000           | 0.000           | 0.000           | 0.016           | 30.714          | 0.673           | 0.000           | 0.070           | 1.594           | 0.000           |
| 0.000          | 0.021           | 4.985           | 10.568          | 1.341           | 6.785           | 0.000           | 0.000           | 0.000           | 0.158           | 47.424          | 1.877           | 0.043           | 2.843           | 2.548           | 0.000           |
| 0.000          | 0.020           | 4.005           | 5.163           | 0.460           | 6.874           | 0.000           | 0.000           | 0.000           | 0.030           | 28.798          | 0.171           | 0.021           | 3.445           | 1.330           | 0.072           |
| 0.000          | 0.433           | 2.761           | 0.856           | 0.635           | 9.601           | 0.000           | 0.000           | 0.000           | 0.000           | 39.242          | 0.223           | 0.000           | 0.083           | 0.790           | 0.152           |
| 0.000          | 0.118           | 5.352           | 2.316           | 1.219           | 6.667           | 0.000           | 0.000           | 0.000           | 0.029           | 29.035          | 0.621           | 0.000           | 0.487           | 3.220           | 0.069           |
| 0.000          | 0.243           | 4.431           | 4.325           | 1.229           | 11.897          | 0.000           | 0.000           | 0.000           | 0.072           | 24.063          | 1.417           | 0.075           | 0.393           | 3.152           | 0.066           |
| 0.000          | 0.075           | 4.833           | 4.690           | 0.630           | 12.732          | 0.000           | 0.000           | 0.000           | 0.022           | 39.777          | 0.186           | 0.038           | 3.322           | 1.327           | 0.131           |
| 0.000          | 0.112           | 3.603           | 5.166           | 0.684           | 9.403           | 0.000           | 0.000           | 0.000           | 0.053           | 47.432          | 0.622           | 0.011           | 0.315           | 3.664           | 0.000           |
| 0.000          | 0.069           | 1.712           | 3.970           | 0.388           | 10.489          | 0.000           | 0.000           | 0.000           | 0.007           | 49.855          | 0.095           | 0.000           | 7.000           | 1.122           | 0.000           |
| 0.000          | 0.138           | 2.500           | 2.869           | 0.366           | 8.067           | 0.000           | 0.000           | 0.000           | 0.075           | 21.789          | 1.413           | 0.012           | 0.701           | 1.349           | 0.000           |
| 0.000          | 0.194           | 3.381           | 2.977           | 0.711           | 7.957           | 0.000           | 0.000           | 0.000           | 0.006           | 31.722          | 0.645           | 0.000           | 0.592           | 2.201           | 0.000           |
| 0.000          | 0.085           | 1.671           | 3.785           | 0.700           | 10.074          | 0.000           | 0.000           | 0.000           | 0.008           | 46.727          | 0.620           | 0.000           | 0.407           | 0.303           | 0.075           |
| 0.000          | 0.110           | 3.105           | 2.951           | 0.591           | 9.505           | 0.000           | 0.000           | 0.000           | 0.011           | 42.406          | 0.717           | 0.016           | 0.210           | 0.631           | 0.000           |
| 0.000          | 0.117           | 2.584           | 5.505           | 0.674           | 10.543          | 0.000           | 0.000           | 0.000           | 0.116           | 42.968          | 1.278           | 0.010           | 0.037           | 0.475           | 0.137           |
| 0.021          | 0.152           | 6.361           | 3.199           | 0.797           | 9.568           | 0.000           | 0.000           | 0.000           | 0.294           | 31.455          | 0.467           | 0.000           | 0.509           | 6.520           | 0.000           |
| 0.000          | 0.042           | 23.571          | 4.218           | 0.262           | 20.159          | 0.000           | 0.000           | 0.000           | 0.012           | 42.755          | 0.354           | 0.053           | 0.040           | 0.765           | 0.147           |
| 0.000          | 0.127           | 1.730           | 3.615           | 0.522           | 10.203          | 0.035           | 0.000           | 0.000           | 0.025           | 41.761          | 0.849           | 0.011           | 10.450          | 1.978           | 0.074           |
| 0.000          | 0.110           | 4.499           | 3.616           | 0.071           | 11.854          | 0.000           | 0.000           | 0.000           | 0.044           | 44.239          | 0.442           | 0.000           | 1.756           | 0.932           | 0.129           |
| 0.000          | 0.069           | 3.407           | 4.941           | 1.057           | 5.589           | 0.000           | 0.000           | 0.000           | 0.031           | 29.542          | 0.355           | 0.000           | 0.298           | 0.282           | 0.000           |
| 0.000          | 0.070           | 1.608           | 13.604          | 2.511           | 7.534           | 0.000           | 0.000           | 0.000           | 0.088           | 40.664          | 3.391           | 0.000           | 4.736           | 1.806           | 0.000           |
| 0.000          | 0.319           | 3.260           | 3.397           | 0.462           | 5.522           | 0.000           | 0.000           | 0.000           | 0.072           | 31.089          | 0.381           | 0.019           | 0.179           | 1.637           | 0.132           |
| 0.000          | 0.115           | 4.786           | 3.493           | 0.347           | 8.570           | 0.000           | 0.000           | 0.000           | 0.017           | 58.861          | 0.204           | 0.029           | 7.303           | 3.024           | 0.000           |
| 0.000          | 0.186           | 2.019           | 4.561           | 0.482           | 7.665           | 0.000           | 0.000           | 0.000           | 0.000           | 34.605          | 0.385           | 0.008           | 0.032           | 2.296           | 0.118           |
| 0.000          | 0.152           | 2.111           | 1.522           | 0.491           | 10.152          | 0.000           | 0.000           | 0.000           | 0.000           | 49.259          | 0.606           | 0.000           | 0.384           | 1.162           | 0.000           |
| 0.000          | 0.162           | 2.880           | 1.556           | 0.070           | 11.702          | 0.000           | 0.000           | 0.000           | 0.024           | 46.583          | 0.447           | 0.000           | 3.096           | 0.986           | 0.284           |
| 0.000          | 0.121           | 3.725           | 4.630           | 0.522           | 8.359           | 0.000           | 0.000           | 0.000           | 0.030           | 36.744          | 0.298           | 0.000           | 0.038           | 3.064           | 0.212           |
| 0.000          | 0.152           | 3.566           | 3.577           | 0.230           | 8.804           | 0.000           | 0.000           | 0.000           | 0.045           | 33.437          | 0.488           | 0.019           | 0.036           | 0.926           | 0.000           |
| 0.000          | 0.057           | 3.070           | 2.267           | 0.408           | 15.501          | 0.000           | 0.000           | 0.000           | 0.095           | 29.716          | 0.128           | 0.019           | 7.911           | 0.575           | 0.000           |
| 0.000          | 0.176           | 4.845           | 0.975           | 0.213           | 10.832          | 0.000           | 0.000           | 0.000           | 0.037           | 32.858          | 0.204           | 0.009           | 0.000           | 5.546           | 0.000           |
| 0.000          | 0.112           | 2.603           | 3.185           | 0.493           | 9.403           | 0.000           | 0.000           | 0.000           | 0.053           | 47.432          | 0.622           | 0.011           | 0.315           | 3.664           | 0.000           |
| 0.000          | 0.065           | 1.954           | 4.932           | 0.140           | 6.649           | 0.000           | 0.186           | 0.000           | 0.115           | 65.186          | 0.253           | 0.000           | 12.546          | 2.034           | 0.113           |
| 0.000          | 0.051           | 1.551           | 6.488           | 0.276           | 14.679          | 0.000           | 0.000           | 0.000           | 0.286           | 32.036          | 1.064           | 0.000           | 5.727           | 2.049           | 0.177           |
| 0.000          | 0.126           | 9.409           | 2.890           | 0.710           | 14.286          | 0.000           | 0.000           | 0.000           | 0.225           | 29.781          | 0.277           | 0.018           | 0.035           | 1.905           | 0.000           |
| 0.000          | 0.040           | 7.495           | 4.065           | 0.478           | 12.744          | 0.000           | 0.000           | 0.000           | 0.084           | 56.781          | 0.362           | 0.000           | 3.192           | 0.408           | 0.000           |
| 0.000          | 0.110           | 3.105           | 2.951           | 0.591           | 9.505           | 0.000           | 0.000           | 0.000           | 0.011           | 42.406          | 0.717           | 0.016           | 0.210           | 0.631           | 0.000           |
| 0.000          | 0.000           | 1.433           | 12.798          | 0.674           | 7.776           | 0.000           | 0.000           | 0.000           | 0.032           | 61.863          | 0.512           | 0.000           | 0.407           | 0.115           | 0.000           |
| 0.000          | 0.024           | 3.265           | 15.771          | 0.531           | 4.568           | 0.020           | 0.000           | 0.000           | 0.028           | 46.352          | 0.274           | 0.000           | 0.045           | 2.350           | 0.000           |
| 0.000          | 0.094           | 3.809           | 3.916           | 0.095           | 13.224          | 0.000           | 0.000           | 0.000           | 0.000           | 36.279          | 0.313           | 0.016           | 0.000           | 1.275           | 0.000           |
| 0.000          | 0.174           | 3.089           | 2.529           | 0.504           | 5.762           | 0.000           | 0.000           | 0.000           | 0.081           | 39.399          | 0.221           | 0.000           | 0.047           | 4.231           | 0.174           |
| 0.000          | 0.094           | 6.243           | 3.002           | 0.594           | 8.547           | 0.015           | 0.000           | 0.000           | 0.016           | 39.398          | 0.548           | 0.000           | 0.899           | 1.542           | 0.000           |
| 0.000          | 0.050           | 5.201           | 4.935           | 0.201           | 10.548          | 0.000           | 0.000           | 0.000           | 0.120           | 37.413          | 0.200           | 0.000           | 1.747           | 0.222           | 0.000           |
| 0.000          | 0.050           | 3.590           | 2.9             |                 |                 |                 |                 |                 |                 |                 |                 |                 |                 |                 |                 |

| ENGG0000238121 | ENGG0000277515 | ENGG0000271174 | ENGG0000260886 | ENGG0000281000 | ENGG0000221087 | ENGG0000254308 | ENGG0000256533 | ENGG000016514 | ENGG0000206852 | ENGG0000165474 | ENGG0000100505 | ENGG0000137440 | ENGG0000267315 | ENGG0000192227 | ENGG0000229614 |
|----------------|----------------|----------------|----------------|----------------|----------------|----------------|----------------|---------------|----------------|----------------|----------------|----------------|----------------|----------------|----------------|
| 0.087          | 0.000          | 0.000          | 0.018          | 0.000          | 0.059          | 0.000          | 0.000          | 11.019        | 0.000          | 27.972         | 26.648         | 0.000          | 0.000          | 0.738          | 0.520          |
| 0.042          | 0.000          | 0.000          | 0.265          | 0.000          | 0.404          | 0.000          | 0.146          | 14.367        | 0.000          | 31.048         | 3.611          | 0.000          | 0.240          | 1.835          | 1.011          |
| 0.024          | 0.000          | 0.000          | 0.139          | 0.000          | 0.090          | 0.000          | 0.000          | 14.266        | 0.000          | 0.286          | 19.764         | 0.000          | 0.000          | 1.703          | 1.012          |
| 0.091          | 0.000          | 0.000          | 0.042          | 0.000          | 0.080          | 0.000          | 0.147          | 13.202        | 0.000          | 7.798          | 36.076         | 0.000          | 0.161          | 1.203          | 0.319          |
| 0.151          | 0.000          | 0.000          | 0.184          | 0.000          | 0.060          | 0.000          | 0.000          | 15.155        | 0.000          | 10.696         | 10.696         | 0.000          | 0.086          | 0.785          | 0.496          |
| 0.070          | 0.000          | 0.000          | 0.028          | 0.000          | 0.275          | 0.000          | 0.065          | 15.226        | 0.000          | 0.453          | 26.647         | 0.000          | 0.000          | 3.311          | 0.224          |
| 0.360          | 0.000          | 0.000          | 0.041          | 0.000          | 0.144          | 0.000          | 0.073          | 27.768        | 0.000          | 11.491         | 9.072          | 0.015          | 0.160          | 2.309          | 0.189          |
| 0.101          | 0.000          | 0.000          | 0.055          | 0.000          | 0.867          | 0.000          | 0.000          | 13.057        | 0.000          | 1.565          | 12.278         | 0.000          | 0.000          | 2.103          | 0.467          |
| 0.103          | 0.000          | 0.000          | 0.038          | 0.000          | 0.378          | 0.000          | 0.089          | 10.475        | 0.000          | 31.075         | 12.641         | 0.000          | 0.098          | 3.829          | 0.308          |
| 0.132          | 0.000          | 0.000          | 0.074          | 0.000          | 0.537          | 0.000          | 0.000          | 14.772        | 0.000          | 6.435          | 5.045          | 0.000          | 0.000          | 0.977          | 0.449          |
| 0.222          | 0.000          | 0.000          | 0.075          | 0.000          | 0.748          | 0.000          | 0.318          | 13.661        | 0.000          | 14.328         | 8.403          | 0.000          | 0.209          | 4.768          | 0.165          |
| 0.273          | 0.000          | 0.000          | 0.028          | 0.000          | 0.260          | 0.000          | 0.132          | 16.341        | 0.000          | 1.793          | 38.883         | 0.014          | 0.072          | 3.634          | 0.228          |
| 0.044          | 0.000          | 0.000          | 0.019          | 0.000          | 0.101          | 0.000          | 0.000          | 12.442        | 0.000          | 5.114          | 25.700         | 0.000          | 0.075          | 4.067          | 0.177          |
| 0.032          | 0.000          | 0.000          | 0.045          | 0.000          | 0.207          | 0.000          | 0.381          | 19.667        | 0.000          | 2.849          | 29.376         | 0.013          | 0.139          | 4.546          | 0.165          |
| 0.041          | 0.000          | 0.000          | 0.081          | 0.000          | 0.140          | 0.000          | 0.283          | 10.020        | 0.000          | 8.216          | 14.426         | 0.000          | 0.000          | 3.156          | 0.736          |
| 0.300          | 0.000          | 0.000          | 0.041          | 0.000          | 0.415          | 0.000          | 0.064          | 24.379        | 0.000          | 2.171          | 10.337         | 0.065          | 0.070          | 2.801          | 0.331          |
| 0.011          | 0.000          | 0.000          | 0.052          | 0.000          | 0.094          | 0.000          | 0.000          | 12.272        | 0.000          | 3.315          | 28.985         | 0.000          | 0.000          | 2.822          | 0.191          |
| 0.038          | 0.000          | 0.000          | 0.019          | 0.000          | 0.318          | 0.000          | 0.000          | 10.505        | 0.000          | 0.621          | 5.936          | 0.000          | 0.000          | 2.872          | 0.830          |
| 0.077          | 0.000          | 0.000          | 0.028          | 0.000          | 0.498          | 0.000          | 0.132          | 20.501        | 0.000          | 2.127          | 27.543         | 0.000          | 0.073          | 2.501          | 0.345          |
| 0.031          | 0.000          | 0.000          | 0.010          | 0.000          | 0.035          | 0.000          | 0.354          | 21.791        | 0.198          | 0.590          | 42.396         | 0.000          | 0.078          | 1.789          | 0.246          |
| 0.038          | 0.000          | 0.000          | 0.124          | 0.000          | 5.516          | 0.000          | 0.075          | 13.611        | 0.000          | 0.557          | 7.202          | 0.000          | 0.249          | 2.274          | 0.854          |
| 0.045          | 0.000          | 0.000          | 0.039          | 0.000          | 0.370          | 0.000          | 0.156          | 13.000        | 0.000          | 0.982          | 21.507         | 0.000          | 0.171          | 3.908          | 0.135          |
| 0.061          | 0.000          | 0.000          | 0.043          | 0.000          | 0.264          | 0.000          | 0.229          | 10.492        | 0.214          | 3.283          | 11.527         | 0.000          | 0.000          | 1.686          | 0.595          |
| 0.071          | 0.000          | 0.000          | 0.333          | 0.000          | 0.122          | 0.000          | 0.000          | 15.599        | 0.000          | 53.050         | 4.593          | 0.000          | 0.142          | 0.268          | 0.394          |
| 0.047          | 0.000          | 0.000          | 0.242          | 0.000          | 0.264          | 0.000          | 0.072          | 17.695        | 0.000          | 2.577          | 16.694         | 0.000          | 0.159          | 3.344          | 0.626          |
| 0.071          | 0.000          | 0.000          | 0.005          | 0.000          | 0.111          | 0.000          | 0.075          | 16.862        | 0.000          | 7.557          | 15.398         | 0.000          | 0.165          | 3.160          | 0.130          |
| 0.142          | 0.000          | 0.000          | 0.073          | 0.000          | 0.218          | 0.000          | 0.065          | 14.073        | 0.000          | 16.860         | 9.095          | 0.000          | 0.066          | 2.994          | 0.442          |
| 0.033          | 0.000          | 0.000          | 0.053          | 0.000          | 0.813          | 0.000          | 0.000          | 14.464        | 0.000          | 4.127          | 21.049         | 0.000          | 0.154          | 2.635          | 0.167          |
| 0.087          | 0.000          | 0.000          | 0.032          | 0.181          | 0.464          | 0.000          | 1.190          | 8.181         | 0.000          | 1.931          | 27.560         | 0.000          | 0.000          | 6.757          | 0.387          |
| 0.011          | 0.000          | 0.000          | 0.059          | 0.000          | 0.237          | 0.000          | 0.374          | 10.001        | 0.000          | 0.312          | 27.348         | 0.016          | 0.000          | 6.122          | 0.195          |
| 0.040          | 0.000          | 0.000          | 0.070          | 0.000          | 2.358          | 0.000          | 0.062          | 13.808        | 0.000          | 1.999          | 15.261         | 0.000          | 0.088          | 5.545          | 0.588          |
| 0.033          | 0.000          | 0.000          | 0.018          | 0.000          | 0.070          | 0.000          | 0.000          | 16.077        | 0.000          | 0.591          | 16.820         | 0.000          | 0.425          | 3.373          | 0.448          |
| 0.071          | 0.000          | 0.000          | 0.102          | 0.000          | 0.094          | 0.000          | 0.075          | 12.615        | 0.000          | 17.338         | 9.822          | 0.000          | 0.070          | 2.364          | 0.329          |
| 0.063          | 0.000          | 0.000          | 0.052          | 0.000          | 0.365          | 0.000          | 0.289          | 16.723        | 0.000          | 1.731          | 8.221          | 0.000          | 0.159          | 3.353          | 0.063          |
| 0.133          | 0.000          | 0.000          | 0.022          | 0.000          | 0.091          | 0.000          | 0.000          | 15.020        | 0.000          | 1.874          | 14.895         | 0.000          | 0.168          | 0.962          | 0.663          |
| 0.055          | 0.000          | 0.000          | 0.123          | 0.000          | 0.883          | 0.000          | 0.000          | 15.676        | 0.000          | 6.073          | 24.576         | 0.000          | 0.228          | 4.148          | 0.240          |
| 0.072          | 0.000          | 0.000          | 0.184          | 0.000          | 0.517          | 0.000          | 0.463          | 8.957         | 0.000          | 4.273          | 46.615         | 0.000          | 0.218          | 4.639          | 0.172          |
| 0.182          | 0.000          | 0.000          | 0.075          | 0.000          | 0.346          | 0.000          | 0.065          | 22.707        | 0.000          | 0.102          | 24.182         | 0.000          | 0.073          | 4.705          | 0.057          |
| 0.017          | 0.000          | 0.000          | 0.034          | 0.000          | 0.397          | 0.000          | 0.079          | 14.481        | 0.000          | 2.860          | 28.827         | 0.000          | 0.286          | 3.631          | 0.271          |
| 0.071          | 0.000          | 0.000          | 0.041          | 0.000          | 0.161          | 0.000          | 0.325          | 8.557         | 0.000          | 8.952          | 60.723         | 0.017          | 0.179          | 1.479          | 0.282          |
| 0.124          | 0.000          | 0.000          | 0.064          | 0.000          | 0.224          | 0.000          | 0.162          | 12.037        | 0.000          | 11.392         | 19.851         | 0.000          | 0.000          | 3.999          | 0.421          |
| 0.045          | 0.000          | 0.000          | 0.015          | 0.000          | 0.582          | 0.000          | 0.088          | 9.696         | 0.000          | 6.704          | 39.128         | 0.015          | 0.075          | 3.888          | 0.119          |
| 0.049          | 0.000          | 0.000          | 0.011          | 0.000          | 0.216          | 0.000          | 0.075          | 11.978        | 0.000          | 0.206          | 36.799         | 0.000          | 0.000          | 1.430          | 0.131          |
| 0.020          | 0.000          | 0.000          | 0.065          | 0.000          | 0.220          | 0.000          | 0.065          | 19.284        | 0.000          | 4.100          | 49.368         | 0.000          | 0.071          | 2.284          | 0.168          |
| 0.080          | 0.000          | 0.000          | 0.069          | 0.000          | 0.109          | 0.000          | 0.680          | 12.785        | 0.000          | 6.559          | 45.061         | 0.000          | 0.303          | 3.848          | 0.299          |
| 0.078          | 0.000          | 0.000          | 0.168          | 0.000          | 1.243          | 0.000          | 0.000          | 20.708        | 0.000          | 0.248          | 33.789         | 0.000          | 0.074          | 2.454          | 0.233          |
| 0.113          | 0.000          | 0.000          | 0.053          | 0.000          | 0.037          | 0.000          | 0.830          | 0.000         | 0.211          | 2.418          | 0.000          | 0.000          | 0.325          | 0.479          | 0.963          |
| 0.033          | 0.091          | 0.000          | 0.032          | 0.000          | 0.141          | 0.000          | 0.075          | 12.090        | 0.000          | 1.337          | 33.713         | 0.000          | 0.000          | 2.290          | 0.455          |
| 0.009          | 0.000          | 0.000          | 0.014          | 0.000          | 0.328          | 0.000          | 0.065          | 23.059        | 0.000          | 1.229          | 20.036         | 0.000          | 0.214          | 2.336          | 0.225          |
| 0.067          | 0.000          | 0.000          | 0.114          | 0.000          | 0.397          | 0.000          | 0.000          | 13.808        | 0.000          | 6.443          | 9.962          | 0.000          | 0.286          | 4.798          | 0.282          |
| 0.094          | 0.000          | 0.000          | 0.106          | 0.000          | 1.165          | 0.000          | 0.062          | 14.111        | 0.000          | 1.945          | 8.952          | 0.000          | 0.135          | 3.921          | 0.588          |
| 0.135          | 0.000          | 0.000          | 0.005          | 0.000          | 0.177          | 0.000          | 0.066          | 17.550        | 0.000          | 8.758          | 23.827         | 0.000          | 0.073          | 1.443          | 0.518          |
| 0.162          | 0.000          | 0.000          | 0.048          | 0.000          | 0.147          | 0.000          | 0.000          | 16.697        | 0.000          | 3.856          | 25.123         | 0.000          | 0.074          | 2.994          | 0.468          |
| 0.065          | 0.000          | 0.000          | 0.013          | 0.000          | 0.130          | 0.000          | 0.000          | 16.758        | 0.000          | 3.359          | 31.037         | 0.000          | 0.086          | 3.499          | 0.155          |
| 0.106          | 0.000          | 0.000          | 0.157          | 0.000          | 0.708          | 0.000          | 0.000          | 16.822        | 0.000          | 1.708          | 15.718         | 0.000          | 0.000          | 1.364          | 0.355          |
| 0.000          | 0.000          | 0.000          | 0.000          | 0.000          | 0.085          | 0.331          | 0.000          | 9.027         | 0.000          | 0.715          | 33.797         | 0.000          | 0.000          | 1.848          | 0.993          |
| 0.062          | 0.000          | 0.000          | 0.046          | 0.000          | 0.091          | 0.000          | 0.355          | 9.652         | 0.000          | 2.167          | 38.694         | 0.015          | 0.156          | 2.201          | 0.432          |
| 0.039          | 0.000          | 0.000          | 0.048          | 0.000          | 0.086          | 0.000          | 0.202          | 13.866        | 0.000          | 1.528          | 22.488         | 0.029          | 0.221          | 3.162          | 0.292          |
| 0.024          | 0.000          | 0.000          | 0.029          | 0.000          | 0.905          | 0.000          | 0.000          | 11.220        | 0.000          | 0.493          | 32.029         | 0.014          | 0.073          | 2.205          | 0.290          |
| 0.127          | 0.000          | 0.000          | 0.013          | 0.000          | 0.031          | 0.000          | 0.249          | 15.411        | 0.000          | 1.750          | 18.993         | 0.013          | 0.137          | 1.278          | 0.216          |
| 0.058          | 0.000          | 0.000          | 0.034          | 0.000          | 0.397          | 0.000          | 0.079          | 14.481        | 0.000          | 10.432         | 10.432         | 0.000          | 0.237          | 0.962          | 0.327          |
| 0.150          | 0.000          | 0.000          | 0.033          | 0.000          | 0.904          | 0.000          | 0.114          | 9.825         | 0.000          | 0.666          | 14.334         | 0.000          | 0.251          | 1.614          | 1.189          |
| 0.000          | 0.072          | 0.000          | 0.025          | 0.000          | 0.341          | 0.000          | 0.059          | 9.808         | 0.000          | 2.669          | 39.583         | 0.013          | 0.000          | 2.815          | 0.258          |
| 0.107          | 0.000          | 0.000          | 0.046          | 0.000          | 1.028          | 0.000          | 0.191          | 17.852        | 0.000          | 1.420          | 25.035         | 0.000          | 0.070          | 6.030          | 0.443          |
| 0.052          | 0.000          | 0.000          | 0.010          | 0.000          | 0.239          | 0.000          | 0.000          | 10.287        | 0.000          | 4.273          | 14.419         | 0.000          | 0.078          | 1.791          | 0.432          |
| 0.020          | 0.000          | 0.000          | 0.065          | 0.000          | 0.220          | 0.000          | 0.065          | 19.284        | 0.000          | 4.100          | 49.368         | 0.000          | 0.071          | 2.284          | 0.168          |
| 0.046          | 0.000          | 0.000          | 0.063          | 0.000          | 0.471          | 0.000          | 0.000          | 14.468        | 0.000          | 0.750          | 34.401         | 0.000          | 0.138          | 2.254          | 0.326          |
| 0.030          | 0.000          | 0.000          | 0.012          | 0.000          | 0.083          | 0.000          | 0.083          | 9.958         | 0.000          | 0.616          | 31.477         | 0.000          | 0.092          | 2.502          | 0.507          |
| 0.065          | 0.000          | 0.000          | 0.024          | 0.000          | 0.000          | 0.000          | 0.222          | 25.094        | 0.000          | 0.119          | 40.354         | 0.000          | 0.000          | 1.458          | 0.385          |
| 0.038          | 0.000          | 0.000          | 0.006          | 0.000          | 1.241          | 0.000          | 0.000          | 12.183        | 0.000          | 0.261          | 13.349         | 0.000          | 0.000          | 4.277          | 0.457          |
| 0.019          | 0.000          | 0.000          | 0.027          | 0.000          | 0.171          | 0.000          | 0.000          | 16.159        | 0.000          | 1.195          | 32.574         | 0.000          | 0.070          | 1.282          | 0.277          |
| 0.160          | 0.000          | 0.000          | 0.065          | 0.000          | 0.065          | 0.000          | 0.000          | 12.615        | 0.000          | 1.821          | 9.822          | 0.000          | 0.142          | 3.603          | 0.254          |
| 0.038          | 0.000          | 0.000          |                |                |                |                |                |               |                |                |                |                |                |                |                |

| ENSG0000011989 | ENSG0000023675 | ENSG0000019940 | ENSG0000019824 | ENSG00000259162 | ENSG00000127688 | ENSG00000063372 | ENSG00000083814 | ENSG00000182021 | ENSG00000229688 | ENSG0000014324 | ENSG00000099905 | ENSG00000149343 | ENSG00000160151 | ENSG00000267170 | ENSG00000198218 |        |
|----------------|----------------|----------------|----------------|-----------------|-----------------|-----------------|-----------------|-----------------|-----------------|----------------|-----------------|-----------------|-----------------|-----------------|-----------------|--------|
| 0.175          | 0.000          | 0.000          | 6.596          | 0.171           | 0.327           | 13.550          | 3.497           | 0.029           | 0.000           | 8.821          | 4.554           | 4.081           | 0.994           | 0.226           | 11.850          |        |
| 2.476          | 0.000          | 0.000          | 3.825          | 0.000           | 0.150           | 31.385          | 1.799           | 0.013           | 0.000           | 4.329          | 3.038           | 6.396           | 2.451           | 0.192           | 9.390           |        |
| 1.014          | 0.000          | 0.000          | 6.737          | 0.130           | 0.078           | 33.604          | 5.870           | 0.041           | 0.000           | 3.359          | 3.751           | 8.158           | 6.529           | 0.128           | 15.838          |        |
| 0.250          | 0.000          | 0.000          | 4.211          | 0.184           | 0.345           | 24.594          | 7.569           | 0.013           | 0.000           | 6.981          | 5.809           | 7.939           | 1.056           | 0.242           | 14.732          |        |
| 2.055          | 0.000          | 0.000          | 4.226          | 0.010           | 0.076           | 16.851          | 4.266           | 0.128           | 0.000           | 2.455          | 6.125           | 6.565           | 0.251           | 0.056           | 6.795           |        |
| 0.827          | 0.000          | 0.168          | 6.715          | 0.953           | 1.384           | 18.682          | 8.080           | 0.033           | 0.000           | 12.507         | 8.896           | 8.045           | 1.194           | 0.170           | 19.063          |        |
| 2.471          | 0.000          | 0.000          | 4.918          | 0.018           | 0.107           | 18.732          | 2.694           | 0.012           | 0.000           | 6.339          | 6.487           | 6.505           | 1.090           | 0.144           | 11.744          |        |
| 1.045          | 0.000          | 0.000          | 2.935          | 0.192           | 1.693           | 13.839          | 2.944           | 0.009           | 0.000           | 3.408          | 2.445           | 7.138           | 0.631           | 0.304           | 9.510           |        |
| 0.000          | 0.000          | 0.000          | 3.819          | 0.378           | 0.365           | 21.886          | 3.743           | 0.010           | 0.000           | 4.225          | 3.795           | 9.095           | 1.528           | 0.176           | 12.380          |        |
| 36.679         | 0.000          | 0.000          | 3.313          | 0.032           | 0.000           | 10.781          | 2.877           | 0.000           | 0.000           | 3.089          | 2.285           | 6.886           | 1.325           | 0.853           | 9.811           |        |
| 2.419          | 0.000          | 0.000          | 3.048          | 0.048           | 0.037           | 17.365          | 3.145           | 0.025           | 0.000           | 3.821          | 4.942           | 7.879           | 2.023           | 0.202           | 12.368          |        |
| 0.179          | 0.000          | 0.000          | 5.332          | 0.008           | 0.695           | 15.933          | 4.977           | 0.079           | 0.000           | 9.251          | 5.969           | 6.162           | 1.286           | 0.174           | 15.790          |        |
| 0.323          | 0.000          | 0.000          | 5.263          | 0.017           | 0.339           | 18.366          | 5.713           | 0.008           | 0.000           | 8.497          | 5.179           | 7.994           | 0.461           | 0.000           | 14.795          |        |
| 0.433          | 0.000          | 0.000          | 7.257          | 0.032           | 0.447           | 14.856          | 8.038           | 0.010           | 0.000           | 8.429          | 7.441           | 6.510           | 1.553           | 0.042           | 15.191          |        |
| 0.577          | 0.000          | 0.000          | 7.586          | 0.035           | 0.997           | 12.589          | 4.026           | 0.016           | 0.021           | 6.077          | 2.232           | 5.125           | 1.375           | 0.746           | 11.889          |        |
| 2.117          | 0.000          | 0.000          | 3.528          | 0.040           | 0.000           | 5.965           | 3.669           | 0.008           | 0.000           | 6.099          | 5.577           | 5.435           | 0.747           | 0.042           | 11.918          |        |
| 0.000          | 0.000          | 0.000          | 6.570          | 0.110           | 0.237           | 23.795          | 6.152           | 0.008           | 0.000           | 5.982          | 4.274           | 6.139           | 0.048           | 0.283           | 15.569          |        |
| 1.124          | 0.068          | 0.000          | 3.694          | 0.239           | 0.179           | 56.808          | 6.518           | 0.020           | 0.000           | 2.838          | 1.214           | 8.995           | 0.691           | 0.230           | 9.085           |        |
| 0.045          | 0.000          | 0.000          | 2.321          | 0.033           | 0.155           | 21.509          | 4.229           | 0.008           | 0.052           | 5.364          | 3.772           | 5.748           | 1.131           | 0.175           | 13.810          |        |
| 0.000          | 0.000          | 0.000          | 6.697          | 0.000           | 0.145           | 26.507          | 4.567           | 0.008           | 0.000           | 6.027          | 4.953           | 6.275           | 1.024           | 0.093           | 13.707          |        |
| 0.103          | 0.000          | 0.000          | 2.114          | 0.170           | 0.598           | 40.221          | 3.881           | 0.000           | 0.000           | 2.492          | 1.297           | 9.382           | 1.585           | 0.199           | 9.167           |        |
| 0.106          | 0.000          | 0.000          | 6.737          | 0.078           | 2.908           | 16.111          | 5.398           | 0.004           | 0.061           | 9.107          | 9.891           | 7.117           | 0.656           | 0.033           | 19.314          |        |
| 11.913         | 0.000          | 0.000          | 4.556          | 0.000           | 0.410           | 12.75           | 24.283          | 4.357           | 0.004           | 0.000          | 2.587           | 3.806           | 8.382           | 0.705           | 0.251           | 11.509 |
| 0.705          | 0.000          | 0.000          | 4.725          | 0.000           | 0.000           | 26.758          | 2.190           | 0.048           | 0.000           | 4.720          | 3.171           | 7.706           | 0.623           | 0.385           | 10.867          |        |
| 0.196          | 0.000          | 0.000          | 4.901          | 0.009           | 0.275           | 17.828          | 4.534           | 0.000           | 0.000           | 6.890          | 3.388           | 5.844           | 1.033           | 0.095           | 12.171          |        |
| 0.000          | 0.000          | 0.000          | 4.702          | 0.009           | 0.815           | 19.690          | 4.002           | 0.013           | 0.000           | 7.245          | 6.299           | 6.585           | 1.690           | 0.099           | 15.380          |        |
| 11.366         | 0.000          | 0.000          | 3.884          | 0.011           | 0.150           | 16.144          | 3.777           | 0.005           | 0.000           | 6.194          | 6.339           | 6.044           | 0.348           | 0.000           | 14.424          |        |
| 6.203          | 0.000          | 0.000          | 7.940          | 0.000           | 0.395           | 4.498           | 4.498           | 0.017           | 0.000           | 44.020         | 8.565           | 4.984           | 0.883           | 0.483           | 17.705          |        |
| 0.708          | 0.000          | 0.000          | 6.052          | 0.102           | 0.175           | 22.424          | 7.689           | 0.021           | 0.349           | 7.229          | 7.137           | 6.605           | 1.112           | 0.049           | 11.961          |        |
| 0.000          | 0.000          | 0.000          | 5.939          | 0.009           | 0.571           | 31.350          | 5.290           | 0.030           | 0.000           | 7.024          | 5.359           | 5.874           | 1.267           | 0.148           | 13.265          |        |
| 0.044          | 0.000          | 0.000          | 8.960          | 0.039           | 0.018           | 15.198          | 2.362           | 0.007           | 0.000           | 4.756          | 3.063           | 6.652           | 1.043           | 0.000           | 7.541           |        |
| 0.044          | 0.000          | 0.000          | 5.630          | 0.016           | 0.303           | 14.387          | 6.175           | 0.004           | 0.000           | 11.322         | 8.073           | 7.193           | 1.096           | 0.213           | 16.041          |        |
| 9.952          | 0.000          | 0.000          | 6.260          | 0.357           | 0.237           | 23.795          | 6.152           | 0.008           | 0.000           | 5.565          | 2.143           | 6.853           | 0.247           | 0.000           | 15.207          |        |
| 1.476          | 0.000          | 0.000          | 5.044          | 0.072           | 0.054           | 17.852          | 4.522           | 0.000           | 0.056           | 4.345          | 4.842           | 5.984           | 1.558           | 0.143           | 11.826          |        |
| 0.208          | 0.000          | 0.000          | 3.573          | 0.076           | 0.045           | 19.978          | 4.925           | 0.000           | 0.000           | 7.283          | 6.663           | 7.986           | 0.907           | 0.926           | 8.992           |        |
| 0.000          | 0.000          | 0.000          | 4.260          | 0.130           | 0.305           | 18.786          | 4.767           | 0.000           | 0.054           | 7.903          | 3.405           | 7.469           | 2.000           | 0.183           | 13.433          |        |
| 2.562          | 0.000          | 0.000          | 2.921          | 0.347           | 0.699           | 13.069          | 3.893           | 0.011           | 0.000           | 16.745         | 16.138          | 4.127           | 1.399           | 0.174           | 20.843          |        |
| 59.467         | 0.000          | 0.000          | 4.705          | 0.165           | 0.407           | 23.414          | 6.027           | 0.008           | 0.052           | 11.863         | 5.895           | 6.254           | 0.687           | 0.000           | 19.564          |        |
| 0.161          | 0.000          | 0.000          | 7.940          | 0.046           | 0.395           | 18.442          | 4.877           | 0.023           | 0.062           | 6.045          | 5.912           | 7.402           | 0.889           | 0.152           | 15.413          |        |
| 0.168          | 0.000          | 0.000          | 4.344          | 0.097           | 0.693           | 22.335          | 4.979           | 0.000           | 0.000           | 9.174          | 8.751           | 10.155          | 1.425           | 0.161           | 18.774          |        |
| 0.055          | 0.000          | 0.000          | 6.716          | 0.344           | 0.309           | 15.360          | 2.550           | 0.005           | 0.000           | 8.748          | 7.332           | 7.485           | 2.349           | 0.160           | 13.736          |        |
| 0.000          | 0.000          | 0.000          | 4.747          | 0.000           | 0.261           | 22.881          | 3.997           | 0.012           | 0.000           | 6.501          | 6.202           | 7.292           | 2.210           | 0.045           | 14.583          |        |
| 0.000          | 0.000          | 0.000          | 4.130          | 0.019           | 0.354           | 20.689          | 6.264           | 0.069           | 0.000           | 12.348         | 5.996           | 8.247           | 0.925           | 0.149           | 16.371          |        |
| 0.044          | 0.000          | 0.000          | 6.067          | 0.067           | 0.266           | 14.153          | 4.975           | 0.007           | 0.000           | 10.046         | 8.925           | 6.225           | 1.968           | 0.000           | 15.871          |        |
| 7.702          | 0.000          | 0.000          | 4.754          | 0.017           | 0.647           | 21.569          | 8.890           | 0.047           | 0.000           | 16.710         | 10.144          | 8.642           | 1.051           | 0.136           | 18.809          |        |
| 0.137          | 0.000          | 0.000          | 2.979          | 0.092           | 0.256           | 18.836          | 3.819           | 0.027           | 0.000           | 10.545         | 7.417           | 6.205           | 1.485           | 0.044           | 16.513          |        |
| 0.050          | 0.056          | 0.000          | 5.920          | 0.000           | 0.087           | 30.141          | 2.063           | 0.000           | 0.000           | 13.060         | 9.413           | 8.229           | 0.131           | 0.098           | 18.713          |        |
| 0.051          | 0.000          | 0.000          | 5.843          | 0.893           | 0.593           | 22.195          | 4.097           | 0.004           | 0.000           | 9.456          | 7.377           | 4.507           | 0.935           | 0.099           | 17.947          |        |
| 21.005         | 0.000          | 0.000          | 5.589          | 0.138           | 0.248           | 23.696          | 6.914           | 0.026           | 0.000           | 6.434          | 6.403           | 8.489           | 0.000           | 0.000           | 17.094          |        |
| 6.167          | 0.000          | 0.000          | 2.661          | 0.000           | 0.388           | 18.442          | 2.357           | 0.000           | 0.000           | 10.388         | 10.387          | 6.138           | 0.686           | 0.283           | 12.112          |        |
| 1.844          | 0.000          | 0.000          | 5.405          | 0.131           | 2.950           | 25.232          | 4.145           | 0.014           | 0.000           | 4.591          | 3.614           | 6.834           | 0.818           | 0.732           | 13.784          |        |
| 1.126          | 0.050          | 0.000          | 3.504          | 0.033           | 0.058           | 22.393          | 2.944           | 0.019           | 0.000           | 5.668          | 2.629           | 6.895           | 2.120           | 0.306           | 10.809          |        |
| 2.202          | 0.000          | 0.000          | 7.652          | 0.228           | 0.159           | 24.743          | 4.814           | 0.000           | 0.000           | 4.887          | 3.420           | 6.892           | 1.266           | 0.312           | 15.148          |        |
| 0.284          | 0.000          | 0.000          | 5.492          | 0.000           | 0.088           | 20.311          | 5.967           | 0.041           | 0.000           | 7.464          | 5.541           | 6.518           | 2.179           | 0.157           | 12.015          |        |
| 0.000          | 0.000          | 0.000          | 4.225          | 0.014           | 0.065           | 14.465          | 7.768           | 0.000           | 0.000           | 5.455          | 4.768           | 5.573           | 1.768           | 0.202           | 16.874          |        |
| 0.000          | 0.000          | 0.000          | 3.198          | 0.107           | 0.168           | 23.670          | 2.785           | 0.033           | 0.223           | 10.165         | 4.586           | 5.878           | 1.226           | 0.755           | 16.862          |        |
| 0.193          | 0.000          | 0.000          | 4.879          | 0.053           | 0.063           | 25.542          | 3.938           | 0.004           | 0.000           | 8.329          | 5.663           | 8.008           | 1.275           | 0.469           | 13.164          |        |
| 0.137          | 0.000          | 0.000          | 2.732          | 0.034           | 1.874           | 27.568          | 4.452           | 0.050           | 0.000           | 8.572          | 6.385           | 4.970           | 1.064           | 0.266           | 16.936          |        |
| 0.091          | 0.000          | 0.000          | 5.338          | 0.050           | 0.137           | 16.392          | 3.031           | 0.004           | 0.000           | 7.214          | 5.892           | 6.485           | 2.104           | 0.396           | 14.246          |        |
| 0.212          | 0.000          | 0.000          | 5.092          | 0.234           | 0.201           | 11.301          | 2.594           | 0.004           | 0.000           | 7.941          | 4.887           | 7.836           | 2.370           | 0.247           | 9.020           |        |
| 0.000          | 0.000          | 0.000          | 4.565          | 0.325           | 0.717           | 22.553          | 4.877           | 0.023           | 0.062           | 6.045          | 5.912           | 7.402           | 0.889           | 0.152           | 15.413          |        |
| 7.998          | 0.000          | 0.000          | 6.343          | 0.014           | 0.067           | 39.270          | 4.307           | 0.111           | 0.089           | 5.479          | 3.529           | 7.005           | 1.400           | 0.226           | 14.260          |        |
| 0.000          | 0.000          | 0.155          | 6.221          | 0.060           | 0.227           | 20.305          | 4.816           | 0.031           | 0.000           | 6.884          | 7.055           | 9.562           | 0.721           | 0.235           | 17.034          |        |
| 0.824          | 0.048          | 0.000          | 4.045          | 0.008           | 0.094           | 19.011          | 4.037           | 0.040           | 0.000           | 10.710         | 6.490           | 4.853           | 1.483           | 0.084           | 15.355          |        |
| 0.000          | 0.000          | 0.000          | 5.682          | 0.068           | 0.271           | 27.338          | 3.924           | 0.000           | 0.000           | 7.536          | 4.410           | 10.425          | 1.631           | 0.234           | 19.134          |        |
| 0.000          | 0.000          | 0.000          | 4.244          | 0.000           | 0.163           | 14.734          | 6.264           | 0.000           | 0.000           | 10.046         | 8.925           | 6.225           | 1.968           | 0.000           | 15.871          |        |
| 0.000          | 0.000          | 0.000          | 6.309          | 0.063           | 0.331           | 25.961          | 7.069           | 0.007           | 0.000           | 4.661          | 2.852           | 6.167           | 0.733           | 0.576           | 14.793          |        |
| 0.114          | 0.000          | 0.000          | 3.273          | 0.021           | 0.000           | 33.384          | 8.142           | 0.010           | 0.000           | 3.998          | 1.516           | 8.167           | 0.916           | 0.220           | 8.586           |        |
| 0.000          | 0.000          | 0.000          | 9.104          | 0.000           | 0.065           | 24.244          | 5.485           | 0.032           | 0.000           | 9.239          | 4.442           | 6.390           | 0.673           | 0.439           | 12.389          |        |
| 0.417          | 0.000          | 0.000          | 3.633          | 0.000           | 0.000           | 57.486          | 2.353           | 0.005           | 0.068           | 3.251          | 1.544           | 6.577           | 0.467           | 0.521           | 6.823           |        |
| 0.043          | 0.000          | 0.000          | 6.544          | 0.040           | 0.038           | 23.623          | 4.439           | 0.011           | 0.050           | 5.870          | 3.129           | 6.704           | 1.236           | 0.084           | 12.284          |        |
| 6.819          | 0.000          | 0.000          | 4.000          | 0.000           | 0.000           | 29.888          | 3.218           | 0.000           | 0.000           | 2.704          | 6.710           | 6.959           | 0.710           | 0.372           |                 |        |

| ENGG0000223636 | ENGG0000234287 | ENGG0000265849 | ENGG0000272821 | ENGG0000282609 | ENGG0000318324 | ENGG0000346876 | ENGG0000379187 | ENGG0000412188 | ENGG00004479841 | ENGG0000482618 | ENGG00005163492 | ENGG00005501625418 | ENGG000058392107 | ENGG0000617657 |        |        |
|----------------|----------------|----------------|----------------|----------------|----------------|----------------|----------------|----------------|-----------------|----------------|-----------------|--------------------|------------------|----------------|--------|--------|
| 0.000          | 5.047          | 0.051          | 0.214          | 0.000          | 0.000          | 10.043         | 0.060          | 0.077          | 0.503           | 0.028          | 0.042           | 13.721             | 0.043            | 0.216          | 16.627 |        |
| 0.000          | 18.154         | 0.000          | 0.137          | 0.000          | 0.000          | 5.863          | 0.000          | 0.059          | 0.138           | 0.038          | 0.010           | 10.705             | 0.146            | 0.258          | 23.784 |        |
| 0.000          | 19.538         | 0.038          | 0.446          | 0.000          | 0.000          | 5.313          | 0.038          | 0.041          | 0.289           | 0.053          | 0.084           | 15.761             | 0.032            | 0.229          | 21.248 |        |
| 0.000          | 10.401         | 0.043          | 0.000          | 0.000          | 0.009          | 5.999          | 0.000          | 0.053          | 0.994           | 0.216          | 0.110           | 10.865             | 0.000            | 0.185          | 13.653 |        |
| 0.000          | 10.410         | 0.000          | 0.000          | 0.000          | 0.000          | 7.415          | 0.000          | 0.065          | 0.103           | 0.048          | 0.027           | 6.676              | 0.122            | 0.243          | 20.413 |        |
| 0.000          | 8.465          | 0.076          | 0.444          | 0.000          | 0.000          | 6.859          | 0.331          | 0.064          | 0.527           | 0.243          | 0.117           | 10.965             | 0.086            | 0.098          | 12.269 |        |
| 0.000          | 8.895          | 0.000          | 0.773          | 0.000          | 0.045          | 6.963          | 0.034          | 0.315          | 0.033           | 0.048          | 0.039           | 8.716              | 0.036            | 0.698          | 25.793 |        |
| 0.000          | 10.454         | 0.000          | 0.337          | 0.000          | 0.000          | 5.614          | 0.107          | 0.040          | 0.961           | 0.063          | 0.118           | 11.259             | 0.077            | 0.039          | 19.285 |        |
| 0.000          | 16.107         | 0.157          | 0.722          | 0.000          | 0.028          | 6.719          | 0.021          | 0.024          | 0.804           | 0.189          | 0.066           | 12.286             | 0.178            | 0.718          | 26.983 |        |
| 0.000          | 24.321         | 0.000          | 0.485          | 0.000          | 0.000          | 3.473          | 0.090          | 0.280          | 0.078           | 0.085          | 0.019           | 5.841              | 0.000            | 0.653          | 32.481 |        |
| 0.000          | 9.792          | 0.000          | 0.146          | 0.000          | 0.000          | 12.234         | 0.354          | 0.028          | 0.339           | 0.109          | 0.042           | 0.033              | 9.314            | 0.032          | 0.417  | 27.650 |
| 0.000          | 7.751          | 0.039          | 0.329          | 1.056          | 0.021          | 6.178          | 0.038          | 0.475          | 0.504           | 0.065          | 0.036           | 11.858             | 0.066            | 0.498          | 15.248 |        |
| 0.000          | 5.844          | 0.040          | 0.722          | 0.000          | 0.042          | 5.989          | 0.032          | 0.153          | 1.211           | 0.121          | 0.123           | 11.195             | 0.102            | 0.137          | 13.067 |        |
| 0.000          | 6.113          | 0.037          | 0.397          | 0.000          | 0.000          | 9.719          | 0.096          | 0.040          | 0.305           | 0.031          | 0.050           | 11.289             | 0.190            | 0.385          | 14.371 |        |
| 0.413          | 35.574         | 0.000          | 0.177          | 0.000          | 0.088          | 6.908          | 0.000          | 0.128          | 0.677           | 0.046          | 0.037           | 7.561              | 0.000            | 0.143          | 14.698 |        |
| 0.000          | 7.343          | 0.075          | 0.278          | 0.000          | 0.000          | 8.145          | 0.074          | 0.465          | 0.106           | 0.042          | 0.050           | 4.503              | 0.000            | 0.225          | 13.889 |        |
| 0.214          | 10.933         | 0.000          | 0.275          | 0.000          | 0.000          | 7.503          | 0.043          | 0.000          | 0.346           | 0.072          | 0.058           | 15.734             | 0.256            | 0.111          | 14.514 |        |
| 0.000          | 14.980         | 0.051          | 0.544          | 0.000          | 0.027          | 3.296          | 0.000          | 0.016          | 0.100           | 0.057          | 0.015           | 11.397             | 0.000            | 0.351          | 26.265 |        |
| 0.000          | 12.599         | 0.000          | 0.331          | 0.000          | 0.000          | 4.524          | 0.031          | 0.066          | 0.067           | 0.022          | 0.037           | 7.040              | 0.232            | 0.234          | 16.152 |        |
| 0.000          | 5.692          | 0.000          | 0.354          | 0.000          | 0.000          | 9.088          | 0.033          | 0.026          | 0.008           | 0.046          | 0.054           | 11.945             | 0.318            | 0.107          | 14.032 |        |
| 0.000          | 15.384         | 0.000          | 0.472          | 0.000          | 0.024          | 3.610          | 0.053          | 0.034          | 0.326           | 0.062          | 0.021           | 22.493             | 0.189            | 0.191          | 34.129 |        |
| 0.000          | 7.156          | 0.046          | 0.146          | 0.000          | 0.000          | 12.234         | 0.354          | 0.028          | 0.365           | 0.051          | 0.127           | 7.784              | 0.039            | 0.039          | 11.841 |        |
| 0.000          | 13.467         | 0.090          | 0.286          | 0.000          | 0.024          | 4.586          | 0.035          | 0.145          | 0.716           | 0.075          | 0.038           | 14.909             | 0.152            | 0.115          | 24.070 |        |
| 0.000          | 8.666          | 0.000          | 0.486          | 0.000          | 0.000          | 4.766          | 0.015          | 0.100          | 0.048           | 0.000          | 0.008           | 13.494             | 0.032            | 0.033          | 26.369 |        |
| 0.000          | 11.447         | 0.000          | 0.451          | 0.000          | 0.022          | 6.821          | 0.072          | 0.072          | 0.308           | 0.035          | 0.031           | 6.540              | 0.180            | 0.255          | 20.446 |        |
| 0.000          | 5.101          | 0.088          | 0.375          | 0.000          | 0.000          | 8.361          | 0.061          | 0.054          | 1.448           | 0.098          | 0.059           | 11.869             | 0.000            | 0.872          | 12.717 |        |
| 0.000          | 10.105         | 0.000          | 0.890          | 0.000          | 0.000          | 6.165          | 0.086          | 0.153          | 0.272           | 0.105          | 0.048           | 9.866              | 0.085            | 0.171          | 22.658 |        |
| 0.000          | 20.437         | 0.000          | 0.467          | 0.000          | 0.008          | 8.253          | 0.057          | 0.104          | 0.214           | 0.048          | 0.048           | 9.702              | 0.234            | 0.302          | 23.254 |        |
| 0.000          | 7.673          | 0.088          | 0.279          | 0.000          | 0.000          | 6.284          | 0.087          | 0.202          | 0.249           | 0.207          | 0.049           | 7.335              | 0.223            | 0.150          | 17.471 |        |
| 0.000          | 15.095         | 0.000          | 0.328          | 0.000          | 0.000          | 4.085          | 0.157          | 0.183          | 0.259           | 0.061          | 0.067           | 10.831             | 0.262            | 0.189          | 22.409 |        |
| 0.000          | 13.533         | 0.000          | 0.693          | 0.000          | 0.038          | 8.811          | 0.086          | 0.033          | 1.066           | 0.091          | 0.021           | 15.611             | 0.062            | 0.187          | 37.635 |        |
| 0.000          | 7.895          | 0.076          | 0.202          | 0.000          | 0.000          | 6.140          | 0.113          | 0.035          | 0.137           | 0.063          | 0.012           | 14.011             | 0.129            | 0.065          | 13.174 |        |
| 0.000          | 11.823         | 0.044          | 0.292          | 0.000          | 0.023          | 6.853          | 0.017          | 0.333          | 0.222           | 0.132          | 0.038           | 8.426              | 0.226            | 0.569          | 20.855 |        |
| 0.000          | 11.395         | 0.085          | 1.403          | 0.000          | 0.045          | 6.053          | 0.051          | 0.235          | 0.129           | 0.071          | 0.007           | 8.585              | 0.072            | 0.256          | 21.993 |        |
| 0.000          | 12.638         | 0.000          | 0.764          | 0.000          | 0.000          | 7.581          | 0.125          | 0.041          | 0.066           | 0.075          | 0.029           | 16.317             | 0.076            | 0.309          | 17.999 |        |
| 0.000          | 7.293          | 0.062          | 1.125          | 0.000          | 0.043          | 6.972          | 0.081          | 0.081          | 0.757           | 0.034          | 0.054           | 9.881              | 0.138            | 0.454          | 18.159 |        |
| 0.000          | 6.816          | 0.039          | 1.158          | 0.000          | 0.062          | 10.713         | 0.077          | 0.125          | 0.408           | 0.022          | 0.215           | 9.675              | 0.000            | 0.267          | 8.982  |        |
| 0.000          | 7.480          | 0.000          | 0.626          | 0.000          | 0.041          | 7.474          | 0.046          | 0.644          | 0.124           | 0.119          | 0.111           | 11.222             | 0.036            | 0.367          | 16.068 |        |
| 0.000          | 8.667          | 0.046          | 0.460          | 0.000          | 0.008          | 6.253          | 0.073          | 0.057          | 0.870           | 0.077          | 0.177           | 16.624             | 0.000            | 0.210          | 21.410 |        |
| 0.000          | 8.085          | 0.000          | 0.407          | 0.000          | 0.000          | 5.374          | 0.057          | 0.059          | 0.474           | 0.160          | 0.053           | 12.224             | 0.244            | 0.123          | 14.806 |        |
| 0.000          | 5.596          | 0.065          | 0.405          | 0.000          | 0.025          | 6.628          | 0.075          | 0.132          | 0.554           | 0.079          | 0.030           | 12.443             | 0.121            | 0.277          | 17.245 |        |
| 0.000          | 5.970          | 0.000          | 0.984          | 0.000          | 0.085          | 7.905          | 0.032          | 0.037          | 0.196           | 0.067          | 0.036           | 15.540             | 0.088            | 0.772          | 18.206 |        |
| 0.000          | 8.532          | 0.000          | 0.283          | 0.000          | 0.047          | 7.553          | 0.053          | 0.048          | 0.248           | 0.049          | 0.089           | 8.129              | 0.226            | 0.304          | 17.283 |        |
| 0.000          | 9.672          | 0.076          | 0.566          | 0.000          | 0.029          | 7.233          | 0.060          | 0.105          | 0.222           | 0.065          | 0.067           | 10.704             | 0.067            | 0.294          | 19.276 |        |
| 0.000          | 6.769          | 0.122          | 5.117          | 72.407         | 0.021          | 11.727         | 0.080          | 0.106          | 0.114           | 0.135          | 0.173           | 15.299             | 0.310            | 0.035          | 13.955 |        |
| 0.000          | 4.947          | 0.158          | 0.630          | 0.000          | 0.000          | 7.453          | 0.070          | 0.085          | 0.326           | 0.022          | 0.340           | 7.804              | 0.034            | 0.102          | 12.808 |        |
| 0.000          | 26.316         | 0.000          | 0.370          | 0.000          | 0.069          | 6.011          | 0.121          | 0.027          | 0.401           | 0.036          | 0.014           | 11.966             | 0.037            | 0.224          | 12.353 |        |
| 0.000          | 9.754          | 0.088          | 0.047          | 0.000          | 0.000          | 8.008          | 0.096          | 0.041          | 0.868           | 0.061          | 0.062           | 8.573              | 0.075            | 0.151          | 19.683 |        |
| 0.000          | 14.195         | 0.000          | 0.325          | 0.000          | 0.000          | 7.367          | 0.015          | 0.029          | 0.324           | 0.021          | 0.034           | 14.809             | 0.166            | 0.066          | 17.676 |        |
| 0.000          | 8.723          | 0.036          | 0.460          | 0.000          | 0.008          | 4.962          | 0.038          | 0.048          | 0.862           | 0.020          | 0.046           | 5.516              | 0.082            | 0.302          | 25.655 |        |
| 0.000          | 14.457         | 0.073          | 0.385          | 0.000          | 0.000          | 7.472          | 0.036          | 0.368          | 2.675           | 0.050          | 0.033           | 32.248             | 0.154            | 0.311          | 26.757 |        |
| 0.097          | 19.976         | 0.039          | 1.078          | 0.000          | 0.000          | 5.715          | 0.023          | 0.072          | 0.138           | 0.000          | 0.151           | 12.608             | 0.133            | 0.335          | 28.599 |        |
| 0.000          | 18.122         | 0.040          | 0.464          | 0.000          | 0.063          | 6.146          | 0.071          | 0.171          | 0.500           | 0.066          | 0.050           | 21.988             | 0.135            | 0.268          | 28.862 |        |
| 0.000          | 12.435         | 0.000          | 0.298          | 0.000          | 0.000          | 7.839          | 0.035          | 0.027          | 0.007           | 0.039          | 0.064           | 15.678             | 0.089            | 0.211          | 19.969 |        |
| 0.000          | 28.100         | 0.000          | 0.566          | 0.000          | 0.029          | 6.263          | 0.060          | 0.105          | 0.222           | 0.065          | 0.067           | 10.704             | 0.067            | 0.294          | 19.276 |        |
| 0.000          | 53.491         | 0.000          | 0.358          | 0.000          | 0.000          | 9.558          | 0.167          | 0.026          | 0.310           | 0.084          | 0.091           | 18.794             | 0.286            | 0.000          | 20.779 |        |
| 0.000          | 13.134         | 0.000          | 0.178          | 0.000          | 0.000          | 6.716          | 0.124          | 0.039          | 0.116           | 0.047          | 0.016           | 11.013             | 0.107            | 0.144          | 27.226 |        |
| 0.000          | 18.349         | 0.079          | 0.756          | 0.000          | 0.000          | 10.287         | 0.047          | 0.085          | 0.235           | 0.055          | 0.082           | 14.606             | 0.168            | 0.034          | 18.564 |        |
| 0.000          | 11.574         | 0.039          | 0.960          | 0.000          | 0.021          | 8.427          | 0.155          | 0.030          | 0.543           | 0.033          | 0.057           | 14.079             | 0.334            | 0.304          | 14.656 |        |
| 0.000          | 13.268         | 0.037          | 0.195          | 0.000          | 0.000          | 12.844         | 0.007          | 0.197          | 0.531           | 0.031          | 0.190           | 5.060              | 0.125            | 0.346          | 10.483 |        |
| 0.000          | 14.522         | 0.046          | 0.286          | 0.000          | 0.000          | 6.152          | 0.128          | 0.062          | 0.174           | 0.082          | 0.177           | 16.624             | 0.000            | 0.230          | 21.410 |        |
| 0.000          | 20.448         | 0.202          | 0.286          | 0.000          | 0.071          | 5.262          | 0.053          | 0.093          | 0.418           | 0.037          | 0.011           | 15.045             | 0.000            | 0.288          | 28.451 |        |
| 0.000          | 7.277          | 0.035          | 0.149          | 0.000          | 0.000          | 7.389          | 0.152          | 0.021          | 1.804           | 0.068          | 0.053           | 11.887             | 0.327            | 0.120          | 12.279 |        |
| 0.000          | 9.754          | 0.113          | 0.319          | 0.256          | 0.000          | 8.864          | 0.134          | 0.092          | 0.135           | 0.031          | 0.156           | 8.822              | 0.084            | 0.161          | 17.900 |        |
| 0.000          | 11.516         | 0.042          | 0.622          | 0.000          | 0.000          | 7.588          | 0.041          | 0.064          | 0.254           | 0.070          | 0.109           | 19.735             | 0.107            | 0.000          | 22.283 |        |
| 0.000          | 34.844         | 0.000          | 0.283          | 0.000          | 0.000          | 6.086          | 0.046          | 0.036          | 0.065           | 0.075          | 0.066           | 11.270             | 0.046            | 0.306          | 19.276 |        |
| 0.000          | 14.900         | 0.074          | 0.470          | 0.000          | 0.000          | 6.053          | 0.044          | 0.023          | 0.634           | 0.041          | 0.037           | 17.457             | 0.250            | 0.063          | 19.019 |        |
| 0.000          | 19.868         | 0.000          | 0.104          | 0.000          | 0.000          | 5.171          | 0.019          | 0.000          | 0.019           | 0.014          | 0.012           | 15.849             | 0.083            | 0.000          | 23.527 |        |
| 0.000          | 12.578         | 0.000          | 0.208          | 0.000          | 0.000          | 10.460         | 0.080          | 0.010          | 0.018           | 0.073          | 0.083           | 14.109             | 0.055            | 0.056          | 15.645 |        |
| 0.000          | 19.275         | 0.000          | 0.055          | 0.000          | 0.000          | 4.958          | 0.010          | 0.040          | 0.158           | 0.000          | 0.043           | 18.867             | 0.132            | 0.177          | 36.295 |        |
| 0.000          | 18.031         | 0.000          | 0.200          | 0.000          | 0.020          | 6.876          | 0.000          | 0.023          | 0.092           | 0.031          | 0.013           | 18.214             | 0.032            | 0.129          | 29.660 |        |
| 0.000          | 14.345         | 0.000          | 0.443          | 0.000          | 0.040          | 6.466          | 0.015          | 0.268          | 0.354           | 0.027          | 0.046           | 14.603             | 0.126            | 0.136          | 20.    |        |

| ENSG00000165816 | ENSG00000244537 | ENSG00000244060 | ENSG00000213638 | ENSG00000279204 | ENSG00000217179 | ENSG00000235429 | ENSG00000227892 | ENSG00000109854 | ENSG00000171713 | ENSG00000255326 | ENSG00000217107 | ENSG00000239420 | ENSG00000263282 | ENSG00000187833 |
|-----------------|-----------------|-----------------|-----------------|-----------------|-----------------|-----------------|-----------------|-----------------|-----------------|-----------------|-----------------|-----------------|-----------------|-----------------|
| 4797            | 0.000           | 0.000           | 1.084           | 1.283           | 0.000           | 8.404           | 0.000           | 0.000           | 4.876           | 1.935           | 0.456           | 0.217           | 0.000           | 0.000           |
| 4995            | 0.000           | 0.000           | 1.308           | 0.348           | 0.083           | 10.616          | 0.052           | 0.000           | 3.558           | 2.138           | 0.291           | 0.061           | 0.000           | 0.000           |
| 6858            | 0.123           | 0.031           | 1.273           | 0.720           | 0.000           | 5.695           | 0.000           | 0.000           | 4.460           | 9.857           | 0.259           | 0.091           | 0.000           | 0.000           |
| 5819            | 0.000           | 0.070           | 1.489           | 0.446           | 0.084           | 6.287           | 0.000           | 0.000           | 1.274           | 4.958           | 0.163           | 0.041           | 0.035           | 0.000           |
| 7187            | 0.000           | 0.003           | 0.183           | 0.451           | 0.000           | 21.907          | 0.000           | 0.020           | 22.841          | 2.057           | 0.592           | 0.069           | 0.000           | 0.000           |
| 6246            | 0.000           | 0.000           | 0.218           | 0.233           | 0.074           | 6.465           | 0.000           | 0.000           | 3.921           | 0.785           | 0.860           | 0.190           | 0.000           | 0.012           |
| 3512            | 0.000           | 0.070           | 1.361           | 1.295           | 0.000           | 16.381          | 0.000           | 0.000           | 6.795           | 2.660           | 0.323           | 0.102           | 0.000           | 0.000           |
| 5332            | 0.000           | 0.000           | 0.785           | 0.268           | 0.000           | 14.239          | 0.000           | 0.000           | 8.498           | 1.747           | 0.546           | 0.086           | 0.000           | 0.000           |
| 5.103           | 0.000           | 0.128           | 0.815           | 1.032           | 0.101           | 8.266           | 0.000           | 0.000           | 8.040           | 7.336           | 0.789           | 0.037           | 0.000           | 0.008           |
| 5527            | 0.000           | 0.124           | 1.102           | 0.701           | 0.000           | 13.441          | 0.184           | 0.000           | 23.699          | 2.221           | 0.918           | 0.073           | 0.000           | 0.000           |
| 3.787           | 0.000           | 0.183           | 0.525           | 0.451           | 0.000           | 21.907          | 0.000           | 0.020           | 22.841          | 2.057           | 0.592           | 0.069           | 0.000           | 0.000           |
| 4803            | 0.000           | 0.158           | 1.240           | 0.450           | 0.000           | 8.235           | 0.000           | 0.000           | 4.946           | 4.968           | 0.438           | 0.129           | 0.032           | 0.000           |
| 5747            | 0.000           | 0.033           | 0.859           | 0.447           | 0.078           | 11.501          | 0.000           | 0.021           | 1.458           | 9.935           | 0.241           | 0.038           | 0.000           | 0.000           |
| 6292            | 0.000           | 0.030           | 1.697           | 0.303           | 0.145           | 9.143           | 0.000           | 0.000           | 2.380           | 5.199           | 0.704           | 0.036           | 0.000           | 0.000           |
| 4338            | 0.000           | 0.136           | 1.279           | 0.183           | 0.000           | 7.498           | 0.000           | 0.000           | 3.068           | 3.401           | 0.377           | 0.040           | 0.000           | 0.000           |
| 3.939           | 0.000           | 0.000           | 1.034           | 0.398           | 0.145           | 23.622          | 0.078           | 0.000           | 10.921          | 2.216           | 0.761           | 0.045           | 0.000           | 0.000           |
| 5.344           | 0.000           | 0.035           | 1.542           | 0.378           | 0.000           | 6.830           | 0.000           | 0.000           | 4.942           | 5.237           | 0.233           | 0.062           | 0.000           | 0.000           |
| 12.821          | 0.000           | 0.000           | 1.146           | 0.371           | 0.000           | 5.042           | 0.000           | 0.000           | 6.092           | 2.390           | 0.425           | 0.000           | 0.000           | 0.000           |
| 5471            | 0.000           | 0.000           | 1.667           | 0.530           | 0.000           | 22.828          | 0.000           | 0.000           | 5.511           | 5.605           | 0.147           | 0.000           | 0.000           | 0.000           |
| 4211            | 0.000           | 0.034           | 0.813           | 0.210           | 0.081           | 7.894           | 0.000           | 0.000           | 1.360           | 5.590           | 0.126           | 0.050           | 0.000           | 0.007           |
| 6.228           | 0.000           | 0.038           | 0.740           | 0.341           | 0.000           | 9.362           | 0.108           | 0.000           | 5.688           | 2.860           | 0.502           | 0.021           | 0.000           | 0.000           |
| 5.344           | 0.000           | 0.035           | 1.542           | 0.378           | 0.000           | 6.830           | 0.000           | 0.000           | 4.942           | 5.237           | 0.233           | 0.062           | 0.000           | 0.000           |
| 6.844           | 0.000           | 0.037           | 0.934           | 0.649           | 0.000           | 7.352           | 0.000           | 0.000           | 7.650           | 1.872           | 0.440           | 0.021           | 0.000           | 0.000           |
| 2.672           | 0.000           | 0.000           | 0.661           | 1.372           | 0.000           | 9.884           | 0.000           | 0.000           | 12.019          | 6.714           | 0.374           | 0.064           | 0.000           | 0.006           |
| 4.967           | 0.027           | 0.000           | 1.948           | 0.512           | 0.000           | 9.591           | 0.000           | 0.000           | 6.098           | 4.595           | 0.352           | 0.041           | 0.035           | 0.000           |
| 3.331           | 0.000           | 0.036           | 1.909           | 0.484           | 0.171           | 11.645          | 0.000           | 0.000           | 5.201           | 3.658           | 0.799           | 0.253           | 0.000           | 0.000           |
| 4.086           | 0.000           | 0.081           | 0.799           | 0.581           | 0.000           | 7.365           | 0.000           | 0.000           | 12.396          | 2.455           | 0.351           | 0.048           | 0.000           | 0.000           |
| 4.699           | 0.023           | 0.000           | 0.879           | 0.733           | 0.000           | 5.268           | 0.000           | 0.000           | 9.231           | 6.969           | 0.133           | 0.063           | 0.072           | 0.000           |
| 6.704           | 0.028           | 0.143           | 1.230           | 0.423           | 0.085           | 4.484           | 0.000           | 0.000           | 6.742           | 6.263           | 0.462           | 0.052           | 0.000           | 0.034           |
| 7.179           | 0.000           | 0.430           | 1.750           | 0.570           | 0.000           | 5.122           | 0.000           | 0.000           | 1.701           | 9.878           | 0.399           | 0.021           | 0.000           | 0.000           |
| 4.064           | 0.000           | 0.059           | 1.543           | 0.668           | 0.000           | 6.419           | 0.000           | 0.000           | 17.044          | 12.331          | 0.801           | 0.086           | 0.000           | 0.000           |
| 7.232           | 0.000           | 0.155           | 1.217           | 0.108           | 0.074           | 8.319           | 0.000           | 0.000           | 12.783          | 1.960           | 0.372           | 0.072           | 0.000           | 0.000           |
| 5.077           | 0.000           | 0.184           | 0.242           | 0.184           | 0.000           | 15.420          | 0.000           | 0.000           | 6.177           | 4.768           | 0.168           | 0.032           | 0.000           | 0.000           |
| 3.184           | 0.000           | 0.035           | 1.093           | 1.121           | 0.000           | 7.558           | 0.000           | 0.000           | 7.033           | 4.129           | 0.321           | 0.112           | 0.000           | 0.000           |
| 3.737           | 0.000           | 0.000           | 0.553           | 0.493           | 0.000           | 13.337          | 0.000           | 0.000           | 6.787           | 3.270           | 0.746           | 0.064           | 0.000           | 0.000           |
| 6.261           | 0.000           | 0.000           | 0.670           | 0.268           | 0.079           | 20.866          | 0.000           | 0.000           | 11.818          | 2.195           | 0.860           | 0.097           | 0.000           | 0.000           |
| 12.787          | 0.000           | 0.127           | 1.110           | 0.094           | 0.075           | 10.706          | 0.000           | 0.000           | 1.557           | 4.856           | 1.819           | 0.223           | 0.000           | 0.006           |
| 5.189           | 0.000           | 0.063           | 0.810           | 0.256           | 0.377           | 10.681          | 0.000           | 0.000           | 5.769           | 3.016           | 0.410           | 0.111           | 0.000           | 0.000           |
| 7.170           | 0.000           | 0.075           | 1.824           | 0.468           | 0.000           | 10.712          | 0.000           | 0.000           | 3.718           | 13.027          | 0.769           | 0.168           | 0.000           | 0.000           |
| 5.712           | 0.000           | 0.117           | 0.715           | 0.294           | 0.000           | 7.839           | 0.000           | 0.000           | 2.513           | 5.138           | 0.542           | 0.114           | 0.000           | 0.000           |
| 3.269           | 0.000           | 0.039           | 0.669           | 0.157           | 0.000           | 21.743          | 0.000           | 0.000           | 6.758           | 1.840           | 0.647           | 0.045           | 0.000           | 0.000           |
| 4.575           | 0.000           | 0.000           | 0.495           | 0.663           | 0.078           | 14.318          | 0.000           | 0.000           | 8.970           | 5.849           | 0.729           | 0.240           | 0.000           | 0.006           |
| 6.017           | 0.000           | 0.038           | 0.603           | 0.632           | 0.086           | 21.909          | 0.000           | 0.000           | 2.318           | 11.937          | 0.401           | 0.032           | 0.000           | 0.000           |
| 6.355           | 0.000           | 0.000           | 0.242           | 0.242           | 0.074           | 21.395          | 0.000           | 0.000           | 3.116           | 6.640           | 0.668           | 0.045           | 0.000           | 0.000           |
| 7.013           | 0.000           | 0.099           | 1.032           | 0.667           | 0.157           | 16.998          | 0.000           | 0.000           | 1.209           | 7.597           | 1.039           | 0.058           | 0.000           | 0.000           |
| 10.970          | 0.000           | 0.000           | 0.642           | 0.208           | 0.000           | 11.145          | 0.000           | 0.000           | 8.874           | 3.124           | 0.865           | 0.075           | 0.000           | 0.000           |
| 10.450          | 0.000           | 0.284           | 2.025           | 0.812           | 0.084           | 6.579           | 0.000           | 0.023           | 3.247           | 49.144          | 0.886           | 0.073           | 0.038           | 0.000           |
| 7.866           | 0.028           | 0.108           | 1.702           | 0.203           | 0.000           | 5.754           | 0.053           | 0.000           | 3.271           | 7.091           | 0.399           | 0.042           | 0.000           | 0.007           |
| 3.709           | 0.000           | 0.000           | 0.956           | 0.560           | 0.000           | 8.045           | 0.000           | 0.000           | 6.095           | 3.559           | 0.046           | 0.064           | 0.000           | 0.000           |
| 4.528           | 0.000           | 0.282           | 1.382           | 0.332           | 0.000           | 15.157          | 0.000           | 0.000           | 18.253          | 5.138           | 0.034           | 0.000           | 0.000           | 0.000           |
| 7.992           | 0.000           | 0.030           | 0.677           | 0.525           | 0.000           | 9.004           | 0.000           | 0.019           | 8.488           | 2.484           | 0.410           | 0.182           | 0.000           | 0.000           |
| 5.372           | 0.000           | 0.064           | 0.659           | 0.565           | 0.076           | 18.915          | 0.000           | 0.000           | 4.217           | 4.474           | 1.206           | 0.140           | 0.000           | 0.000           |
| 7.322           | 0.000           | 0.000           | 0.558           | 0.810           | 0.000           | 11.292          | 0.048           | 0.000           | 8.380           | 4.627           | 0.509           | 0.057           | 0.000           | 0.000           |
| 6.220           | 0.000           | 0.000           | 1.079           | 0.339           | 0.068           | 9.527           | 0.043           | 0.000           | 2.169           | 10.047          | 0.424           | 0.042           | 0.000           | 0.027           |
| 6.155           | 0.000           | 0.000           | 0.241           | 0.705           | 0.126           | 15.799          | 0.000           | 0.000           | 4.567           | 7.799           | 0.769           | 0.016           | 0.000           | 0.000           |
| 9.341           | 0.000           | 0.137           | 0.443           | 0.185           | 0.000           | 9.834           | 0.204           | 0.000           | 3.044           | 2.485           | 0.254           | 0.000           | 0.000           | 0.054           |
| 6.199           | 0.000           | 0.068           | 0.716           | 0.156           | 0.000           | 12.951          | 0.051           | 0.000           | 13.363          | 1.362           | 0.600           | 0.070           | 0.000           | 0.000           |
| 4.118           | 0.000           | 0.064           | 1.258           | 0.373           | 0.000           | 8.959           | 0.000           | 0.000           | 3.214           | 6.916           | 0.298           | 0.066           | 0.000           | 0.000           |
| 4.912           | 0.000           | 0.000           | 0.811           | 0.612           | 0.000           | 8.738           | 0.000           | 0.000           | 14.587          | 2.999           | 0.415           | 0.019           | 0.000           | 0.000           |
| 4.430           | 0.000           | 0.000           | 0.740           | 0.314           | 0.000           | 12.784          | 0.000           | 0.000           | 11.144          | 1.446           | 0.387           | 0.009           | 0.000           | 0.000           |
| 4.699           | 0.000           | 0.075           | 0.824           | 0.468           | 0.000           | 10.712          | 0.000           | 0.000           | 3.718           | 13.027          | 0.769           | 0.168           | 0.000           | 0.000           |
| 4.858           | 0.000           | 0.000           | 1.933           | 0.177           | 0.000           | 6.674           | 0.000           | 0.000           | 6.245           | 4.621           | 1.011           | 0.032           | 0.000           | 0.000           |
| 6.774           | 0.045           | 0.057           | 1.467           | 0.154           | 0.136           | 5.667           | 0.000           | 0.000           | 4.036           | 1.752           | 0.713           | 0.200           | 0.000           | 0.011           |
| 5.359           | 0.000           | 0.000           | 1.573           | 0.469           | 0.146           | 6.160           | 0.045           | 0.000           | 13.358          | 1.651           | 0.311           | 0.090           | 0.081           | 0.000           |
| 3.947           | 0.000           | 0.034           | 0.716           | 0.587           | 0.081           | 9.257           | 0.000           | 0.000           | 8.215           | 4.836           | 0.473           | 0.040           | 0.000           | 0.000           |
| 6.964           | 0.000           | 0.000           | 0.603           | 0.242           | 0.074           | 21.395          | 0.000           | 0.000           | 4.567           | 7.799           | 0.769           | 0.016           | 0.000           | 0.000           |
| 7.013           | 0.000           | 0.099           | 1.032           | 0.667           | 0.157           | 16.998          | 0.000           | 0.000           | 1.209           | 7.597           | 1.039           | 0.058           | 0.000           | 0.000           |
| 10.450          | 0.000           | 0.284           | 2.025           | 0.812           | 0.084           | 6.579           | 0.000           | 0.023           | 3.247           | 49.144          | 0.886           | 0.073           | 0.038           | 0.000           |
| 7.866           | 0.028           | 0.108           | 1.702           | 0.203           | 0.000           | 5.754           | 0.053           | 0.000           | 3.271           | 7.091           | 0.399           | 0.042           | 0.000           | 0.007           |
| 3.709           | 0.000           | 0.000           | 0.956           | 0.560           | 0.000           | 8.045           | 0.000           | 0.000           | 6.095           | 3.559           | 0.046           | 0.064           | 0.000           | 0.000           |
| 4.528           | 0.000           | 0.282           | 1.382           | 0.332           | 0.000           | 15.157          | 0.000           | 0.000           | 18.253          | 5.138           | 0.034           | 0.000           | 0.000           | 0.000           |
| 7.992           | 0.000           | 0.030           | 0.677           | 0.525           | 0.000           | 9.004           | 0.000           | 0.019           | 8.488           | 2.484           | 0.410           | 0.182           | 0.000           | 0.000           |
| 5.372           | 0.000           | 0.064           | 0.659           | 0.565           | 0.076           | 18.915          | 0.000           | 0.000           | 4.217           | 4.474           | 1.206           | 0.140           | 0.000           | 0.000           |
| 7.322           | 0.000           | 0.000           | 0.558           | 0.810           | 0.000           | 11.292          | 0.048           | 0.000           | 8.380           | 4.627           | 0.509           | 0.057           | 0.000           | 0.000           |
| 6.220           | 0.000           | 0.000           | 1.079           | 0.339           | 0.068           | 9.527           | 0.043           | 0.000           | 2.169           | 10.047          | 0.424           | 0.042           | 0.000           | 0.027           |
| 6.155           | 0.000           | 0.000           | 0.241           | 0.705           | 0.126           | 15.799          | 0.000           | 0.000           | 4.567           | 7.799           | 0.769           | 0.016           | 0.000           | 0.000           |
| 9.341           | 0.000           | 0.137           | 0.443           | 0.185           | 0.000           | 9.834           | 0.204           | 0.000           | 3.044           | 2.485           | 0.254           | 0.000           | 0.000           | 0.054           |
| 6.199           | 0.000           | 0.068           | 0.716           | 0.156           | 0.000           |                 |                 |                 |                 |                 |                 |                 |                 |                 |

| ENSG0000024862 | ENSG0000011089 | ENSG00000123636 | ENSG0000023193 | ENSG00000201815 | ENSG00000272506 | ENSG00000199709 | ENSG00000246669 | ENSG0000029421 | ENSG00000260586 | ENSG00000220999 | ENSG00000249818 | ENSG0000017906 | ENSG00000213216 | ENSG00000251656 | ENSG00000122176 |
|----------------|----------------|-----------------|----------------|-----------------|-----------------|-----------------|-----------------|----------------|-----------------|-----------------|-----------------|----------------|-----------------|-----------------|-----------------|
| 0.078          | 0.240          | 1.631           | 0.105          | 0.000           | 0.530           | 0.000           | 0.000           | 0.000          | 0.000           | 0.000           | 0.000           | 9.340          | 0.780           | 0.161           | 1.316           |
| 0.000          | 1.166          | 0.698           | 0.059          | 0.000           | 0.102           | 0.301           | 0.000           | 0.000          | 0.000           | 0.000           | 0.000           | 12.051         | 1.049           | 0.000           | 23.019          |
| 0.059          | 0.208          | 1.524           | 0.040          | 0.000           | 0.000           | 0.000           | 0.000           | 0.000          | 0.000           | 0.000           | 0.000           | 23.299         | 1.180           | 0.000           | 1.002           |
| 0.022          | 0.823          | 2.557           | 0.030          | 0.000           | 0.034           | 0.152           | 0.000           | 0.000          | 0.000           | 0.000           | 0.000           | 9.147          | 0.613           | 0.000           | 6.128           |
| 0.025          | 0.129          | 3.554           | 0.056          | 0.000           | 0.221           | 0.026           | 0.000           | 0.000          | 0.000           | 0.000           | 0.000           | 10.075         | 0.526           | 0.000           | 6.567           |
| 0.217          | 0.129          | 3.554           | 0.056          | 0.000           | 0.241           | 0.000           | 0.072           | 0.000          | 0.000           | 0.000           | 0.000           | 11.125         | 0.539           | 0.000           | 0.659           |
| 0.000          | 0.436          | 1.167           | 0.030          | 0.000           | 0.034           | 0.750           | 0.000           | 0.081          | 0.030           | 0.000           | 0.000           | 9.626          | 0.441           | 0.000           | 23.837          |
| 0.023          | 0.215          | 0.746           | 0.078          | 0.629           | 0.000           | 0.000           | 0.000           | 0.000          | 0.000           | 0.000           | 0.000           | 8.463          | 0.408           | 0.048           | 16.443          |
| 0.000          | 0.107          | 1.169           | 0.018          | 0.000           | 0.125           | 0.000           | 0.000           | 0.000          | 0.000           | 0.000           | 0.000           | 10.740         | 0.674           | 0.167           | 8.275           |
| 0.000          | 0.414          | 0.998           | 0.053          | 0.000           | 0.000           | 1.067           | 0.000           | 0.000          | 0.000           | 0.000           | 0.000           | 8.979          | 1.373           | 0.000           | 13.590          |
| 0.019          | 0.305          | 1.195           | 0.150          | 0.000           | 0.119           | 0.000           | 0.000           | 0.000          | 0.000           | 0.000           | 0.460           | 0.289          | 0.000           | 0.000           | 18.210          |
| 0.140          | 0.395          | 1.638           | 0.054          | 0.000           | 0.031           | 0.138           | 0.000           | 0.000          | 0.000           | 0.000           | 0.000           | 9.884          | 0.499           | 0.000           | 8.779           |
| 0.000          | 0.299          | 1.779           | 0.194          | 0.000           | 0.032           | 0.140           | 0.000           | 0.000          | 0.000           | 0.000           | 0.000           | 6.396          | 0.154           | 0.128           | 33.603          |
| 0.077          | 0.610          | 1.813           | 0.091          | 0.000           | 0.208           | 0.393           | 0.000           | 0.000          | 0.000           | 0.000           | 0.000           | 7.851          | 0.289           | 0.040           | 6.388           |
| 0.086          | 0.679          | 0.662           | 0.520          | 0.000           | 0.132           | 0.584           | 0.000           | 0.000          | 0.000           | 0.000           | 0.000           | 6.664          | 2.574           | 0.000           | 4.123           |
| 0.000          | 0.458          | 1.815           | 0.130          | 0.000           | 0.149           | 0.131           | 0.051           | 0.000          | 0.000           | 0.000           | 0.000           | 5.570          | 0.040           | 0.000           | 7.510           |
| 0.045          | 0.147          | 1.964           | 0.090          | 0.000           | 0.099           | 0.302           | 0.000           | 0.000          | 0.000           | 0.000           | 0.000           | 9.349          | 0.389           | 0.046           | 9.459           |
| 0.027          | 0.070          | 0.995           | 0.038          | 0.000           | 0.041           | 0.180           | 0.000           | 0.000          | 0.000           | 0.000           | 0.000           | 12.660         | 1.121           | 0.055           | 2.399           |
| 0.000          | 0.450          | 0.735           | 0.162          | 0.000           | 0.031           | 0.000           | 0.000           | 0.000          | 0.000           | 0.000           | 0.000           | 7.026          | 0.301           | 0.042           | 4.709           |
| 0.043          | 0.368          | 0.900           | 0.043          | 0.000           | 0.033           | 0.000           | 0.000           | 0.000          | 0.000           | 0.256           | 0.000           | 7.580          | 0.322           | 0.000           | 20.635          |
| 0.000          | 0.453          | 0.908           | 0.169          | 0.000           | 0.106           | 0.623           | 0.000           | 0.000          | 0.000           | 0.000           | 0.000           | 13.978         | 0.972           | 0.000           | 14.025          |
| 0.046          | 0.216          | 4.359           | 0.143          | 0.000           | 0.219           | 0.000           | 0.000           | 0.000          | 0.000           | 0.000           | 0.000           | 12.042         | 0.177           | 0.000           | 5.364           |
| 0.046          | 0.183          | 1.081           | 0.108          | 0.000           | 0.100           | 0.000           | 0.000           | 0.000          | 0.000           | 0.275           | 0.000           | 14.692         | 0.867           | 0.000           | 5.507           |
| 0.020          | 0.311          | 0.722           | 0.079          | 0.000           | 0.000           | 0.401           | 0.000           | 0.000          | 0.027           | 0.000           | 0.000           | 11.225         | 0.393           | 0.000           | 22.049          |
| 0.022          | 0.433          | 0.921           | 0.118          | 0.000           | 0.034           | 0.149           | 0.058           | 0.000          | 0.000           | 0.000           | 0.000           | 6.314          | 0.493           | 0.045           | 15.338          |
| 0.114          | 0.480          | 1.520           | 0.061          | 0.000           | 0.105           | 0.000           | 0.000           | 0.000          | 0.000           | 0.000           | 0.000           | 6.392          | 0.341           | 0.000           | 8.580           |
| 0.000          | 0.306          | 1.026           | 0.104          | 0.000           | 0.208           | 1.051           | 0.026           | 0.000          | 0.000           | 0.000           | 0.000           | 8.044          | 0.837           | 0.000           | 16.608          |
| 0.000          | 0.419          | 0.714           | 0.183          | 0.000           | 0.070           | 0.000           | 0.000           | 0.000          | 0.000           | 0.000           | 0.000           | 9.774          | 1.133           | 0.000           | 6.283           |
| 0.227          | 0.387          | 2.053           | 0.122          | 0.000           | 0.278           | 0.154           | 0.000           | 0.000          | 0.000           | 0.000           | 0.000           | 9.802          | 0.282           | 0.093           | 37.840          |
| 0.023          | 0.479          | 1.874           | 0.031          | 0.000           | 0.105           | 0.154           | 0.000           | 0.000          | 0.000           | 0.270           | 0.000           | 18.453         | 0.454           | 0.000           | 8.350           |
| 0.188          | 0.345          | 0.832           | 0.138          | 0.000           | 0.029           | 0.254           | 0.000           | 0.000          | 0.000           | 0.222           | 0.000           | 11.051         | 0.747           | 0.116           | 19.159          |
| 0.039          | 0.491          | 2.113           | 0.105          | 0.000           | 0.181           | 0.133           | 0.000           | 0.000          | 0.000           | 0.233           | 0.000           | 14.782         | 0.196           | 0.000           | 9.688           |
| 0.023          | 0.465          | 1.965           | 0.095          | 0.000           | 0.105           | 0.155           | 0.000           | 0.000          | 0.000           | 0.000           | 0.000           | 7.623          | 0.285           | 0.000           | 15.084          |
| 0.088          | 0.290          | 0.914           | 0.030          | 0.000           | 0.169           | 0.000           | 0.000           | 0.000          | 0.000           | 0.000           | 0.000           | 9.756          | 0.658           | 0.091           | 105.857         |
| 0.047          | 0.795          | 1.756           | 0.156          | 0.000           | 0.071           | 0.000           | 0.000           | 0.000          | 0.000           | 0.000           | 0.000           | 14.471         | 3.592           | 0.000           | 20.487          |
| 0.063          | 0.415          | 1.900           | 0.071          | 0.000           | 0.065           | 0.429           | 0.056           | 0.000          | 0.000           | 0.000           | 0.000           | 10.904         | 0.472           | 0.043           | 31.585          |
| 0.000          | 0.529          | 3.662           | 0.040          | 0.000           | 0.371           | 0.546           | 0.000           | 0.000          | 0.000           | 0.239           | 0.000           | 7.831          | 0.251           | 0.125           | 40.847          |
| 0.040          | 0.317          | 2.641           | 0.040          | 0.000           | 0.278           | 0.981           | 0.053           | 0.000          | 0.000           | 0.238           | 0.000           | 7.929          | 0.300           | 0.083           | 59.777          |
| 0.034          | 0.419          | 1.939           | 0.096          | 0.000           | 0.378           | 0.110           | 0.000           | 0.000          | 0.000           | 0.000           | 0.000           | 7.611          | 0.717           | 0.148           | 21.714          |
| 0.025          | 0.358          | 2.863           | 0.050          | 0.000           | 0.114           | 0.338           | 0.000           | 0.000          | 0.000           | 0.000           | 0.000           | 8.483          | 0.555           | 0.051           | 22.742          |
| 0.025          | 0.227          | 2.139           | 0.017          | 0.000           | 0.076           | 0.334           | 0.000           | 0.000          | 0.000           | 0.000           | 0.000           | 8.653          | 0.553           | 0.000           | 41.180          |
| 0.104          | 0.712          | 1.330           | 0.098          | 0.000           | 0.160           | 0.424           | 0.000           | 0.000          | 0.000           | 0.000           | 0.000           | 16.311         | 0.467           | 0.043           | 15.440          |
| 0.046          | 0.573          | 2.371           | 0.062          | 0.000           | 0.035           | 0.155           | 0.000           | 0.000          | 0.000           | 0.000           | 0.000           | 11.813         | 0.742           | 0.047           | 10.917          |
| 0.079          | 0.672          | 2.033           | 0.079          | 0.000           | 0.060           | 0.400           | 0.000           | 0.000          | 0.000           | 0.000           | 0.000           | 11.016         | 0.343           | 0.081           | 16.458          |
| 0.000          | 0.441          | 4.810           | 0.084          | 0.000           | 0.129           | 0.000           | 0.000           | 0.000          | 0.249           | 0.000           | 0.000           | 14.085         | 0.470           | 0.000           | 38.305          |
| 0.020          | 0.591          | 1.584           | 0.041          | 0.000           | 0.157           | 0.277           | 0.000           | 0.000          | 0.000           | 0.000           | 0.000           | 14.378         | 0.255           | 0.253           | 43.381          |
| 0.023          | 0.326          | 2.723           | 0.045          | 0.000           | 0.069           | 0.000           | 0.000           | 0.000          | 0.184           | 0.000           | 0.000           | 18.963         | 1.122           | 0.093           | 129.185         |
| 0.137          | 0.240          | 2.659           | 0.092          | 0.000           | 0.245           | 0.000           | 0.000           | 0.000          | 0.000           | 0.000           | 0.000           | 10.565         | 0.965           | 0.000           | 0.764           |
| 0.040          | 0.545          | 2.863           | 0.086          | 0.000           | 0.081           | 0.402           | 0.000           | 0.000          | 0.000           | 0.000           | 0.000           | 12.527         | 0.738           | 0.000           | 53.228          |
| 0.025          | 0.419          | 1.939           | 0.096          | 0.000           | 0.150           | 0.000           | 0.000           | 0.000          | 0.000           | 0.000           | 0.000           | 9.733          | 0.883           | 0.031           | 19.211          |
| 0.019          | 0.395          | 1.268           | 0.126          | 0.000           | 0.058           | 0.382           | 0.049           | 0.000          | 0.000           | 0.000           | 0.000           | 19.557         | 0.701           | 0.000           | 7.027           |
| 0.020          | 0.716          | 1.184           | 0.108          | 0.181           | 0.062           | 0.137           | 0.000           | 0.000          | 0.000           | 0.000           | 0.000           | 10.717         | 0.955           | 0.042           | 70.269          |
| 0.103          | 0.378          | 1.700           | 0.138          | 0.000           | 0.000           | 0.139           | 0.000           | 0.000          | 0.000           | 0.000           | 0.000           | 18.664         | 0.563           | 0.170           | 38.338          |
| 0.036          | 0.430          | 1.541           | 0.207          | 0.000           | 0.028           | 0.123           | 0.000           | 0.000          | 0.000           | 0.000           | 0.000           | 9.502          | 0.588           | 0.000           | 8.757           |
| 0.000          | 0.000          | 0.000           | 0.000          | 0.000           | 0.000           | 0.000           | 0.000           | 0.000          | 0.000           | 0.000           | 0.000           | 17.059         | 0.383           | 0.000           | 73.331          |
| 0.175          | 0.572          | 3.226           | 0.467          | 0.000           | 0.134           | 0.000           | 0.000           | 0.000          | 0.000           | 0.000           | 0.000           | 21.181         | 2.170           | 0.000           | 4.720           |
| 0.022          | 0.512          | 1.439           | 0.102          | 0.000           | 0.066           | 1.027           | 0.000           | 0.000          | 0.000           | 0.000           | 0.000           | 11.519         | 0.647           | 0.045           | 15.500          |
| 0.021          | 0.323          | 1.325           | 0.137          | 0.000           | 0.126           | 0.139           | 0.000           | 0.000          | 0.000           | 0.000           | 0.000           | 13.753         | 0.408           | 0.084           | 18.787          |
| 0.000          | 0.748          | 1.538           | 0.136          | 0.000           | 0.000           | 0.138           | 0.000           | 0.000          | 0.000           | 0.000           | 0.000           | 11.770         | 0.456           | 0.084           | 6.230           |
| 0.000          | 0.000          | 0.000           | 0.000          | 0.000           | 0.000           | 0.129           | 0.000           | 0.000          | 0.000           | 0.000           | 0.000           | 10.941         | 0.378           | 0.235           | 10.787          |
| 0.070          | 0.411          | 0.808           | 0.117          | 0.000           | 0.160           | 0.707           | 0.000           | 0.000          | 0.000           | 0.000           | 0.000           | 8.784          | 0.819           | 0.000           | 21.448          |
| 0.127          | 0.452          | 1.701           | 0.097          | 0.000           | 0.028           | 0.859           | 0.000           | 0.000          | 0.000           | 0.215           | 0.000           | 6.053          | 0.451           | 0.000           | 4.641           |
| 0.019          | 1.046          | 1.430           | 0.130          | 0.000           | 0.030           | 0.263           | 0.000           | 0.000          | 0.000           | 0.000           | 0.000           | 6.065          | 0.290           | 0.040           | 26.094          |
| 0.000          | 0.341          | 2.255           | 0.145          | 0.000           | 0.066           | 0.880           | 0.000           | 0.000          | 0.000           | 0.000           | 0.000           | 16.370         | 1.132           | 0.045           | 27.899          |
| 0.045          | 0.160          | 1.993           | 0.160          | 0.000           | 0.163           | 0.000           | 0.000           | 0.000          | 0.000           | 0.000           | 0.000           | 9.721          | 0.554           | 0.115           | 4.765           |
| 0.076          | 0.251          | 1.061           | 0.128          | 0.000           | 0.000           | 0.000           | 0.000           | 0.000          | 0.000           | 0.000           | 0.000           | 10.000         | 0.380           | 0.000           | 26.183          |
| 0.051          | 0.267          | 1.151           | 0.088          | 0.000           | 0.156           | 0.172           | 0.000           | 0.000          | 0.000           | 0.000           | 0.000           | 15.481         | 0.760           | 0.000           | 32.142          |
| 0.034          | 0.533          | 2.173           | 0.091          | 0.000           | 0.052           | 0.229           | 0.000           | 0.000          | 0.000           | 0.000           | 0.000           | 8.615          | 0.505           | 0.139           | 1.909           |
| 0.054          | 0.456          | 0.517           | 0.233          | 0.000           | 0.000           | 0.000           | 0.070           | 0.000          | 0.000           | 0.000           | 0.000           | 16.407         | 0.798           | 0.055           | 1.952           |
| 0.097          | 0.384          | 0.946           | 0.117          | 0.000           | 0.000           | 0.000           | 0.000           | 0.000          | 0.000           | 0.231           | 0.000           | 13.405         | 0.872           | 0.000           | 9.657           |
| 0.000          | 0.000          | 0.000           | 0.000          | 0.000           | 0.000           | 0.000           | 0.000           | 0.000          | 0.000           | 0.000           | 0.000           | 15.088         | 1.372           | 0.000           | 23.538          |
| 0.125          | 0.797          | 0.978           | 0.108          | 0.000           | 0.055           | 0.000           | 0.000           | 0.000          | 0.000           | 0.000           | 0.000           | 9.991          | 0.711           | 0.037           | 31.733          |
| 0.106          | 0.323          | 1.115           | 0.212          | 0.000           | 0.054           | 0.714</         |                 |                |                 |                 |                 |                |                 |                 |                 |

| ENSG00000122383 | ENSG00000180770 | ENSG00000138134 | ENSG00000216174 | ENSG00000254824 | ENSG00000128450 | ENSG00000640985 | ENSG00002240228 | ENSG00000186890 | ENSG00000261617 | ENSG00000234882 | ENSG00000248984 | ENSG00000179744 | ENSG00000253818 | ENSG00000164896 |        |
|-----------------|-----------------|-----------------|-----------------|-----------------|-----------------|-----------------|-----------------|-----------------|-----------------|-----------------|-----------------|-----------------|-----------------|-----------------|--------|
| 0.000           | 0.000           | 1.867           | 8.128           | 0.000           | 4.659           | 18.907          | 0.000           | 5.823           | 0.145           | 0.000           | 0.000           | 4.158           | 0.000           | 2.371           | 11.536 |
| 0.000           | 0.000           | 1.138           | 4.585           | 0.000           | 8.362           | 23.080          | 0.000           | 4.184           | 0.020           | 0.000           | 0.000           | 4.657           | 0.052           | 6.212           | 8.859  |
| 0.000           | 0.000           | 1.137           | 10.509          | 0.000           | 3.888           | 34.295          | 0.000           | 5.777           | 0.000           | 0.000           | 0.000           | 3.742           | 0.000           | 2.914           | 33.001 |
| 0.000           | 0.000           | 0.544           | 8.975           | 0.000           | 1.429           | 20.815          | 0.000           | 3.421           | 0.160           | 0.000           | 0.000           | 3.227           | 0.000           | 3.477           | 16.901 |
| 0.000           | 0.000           | 1.715           | 8.570           | 0.000           | 6.570           | 16.750          | 0.000           | 5.247           | 0.060           | 0.000           | 0.000           | 2.947           | 0.000           | 7.871           | 6.819  |
| 0.000           | 0.000           | 1.676           | 11.442          | 0.000           | 5.194           | 28.539          | 0.000           | 4.757           | 0.056           | 0.000           | 0.000           | 3.303           | 0.000           | 2.985           | 24.225 |
| 0.000           | 0.000           | 2.544           | 4.444           | 0.269           | 8.081           | 16.057          | 0.000           | 5.134           | 0.024           | 0.000           | 0.000           | 3.099           | 0.000           | 2.989           | 20.798 |
| 0.000           | 0.000           | 1.328           | 5.804           | 0.000           | 10.429          | 14.018          | 0.000           | 9.481           | 0.159           | 0.000           | 0.000           | 3.833           | 0.055           | 3.482           | 5.585  |
| 0.000           | 0.000           | 1.502           | 5.825           | 0.000           | 5.449           | 22.794          | 0.000           | 7.929           | 0.325           | 0.058           | 0.000           | 2.972           | 0.063           | 4.358           | 7.024  |
| 0.000           | 0.000           | 1.355           | 5.862           | 0.000           | 17.981          | 24.403          | 0.000           | 9.640           | 0.028           | 0.000           | 0.000           | 4.834           | 0.368           | 4.524           | 4.975  |
| 0.000           | 0.000           | 1.445           | 6.235           | 0.255           | 1.038           | 18.743          | 0.000           | 3.762           | 0.132           | 0.000           | 0.000           | 3.105           | 0.138           | 4.029           | 7.113  |
| 0.000           | 0.000           | 1.229           | 6.628           | 0.000           | 4.730           | 17.224          | 0.000           | 3.859           | 0.039           | 0.000           | 0.000           | 2.896           | 0.000           | 2.681           | 18.757 |
| 0.000           | 0.000           | 0.530           | 7.049           | 0.000           | 2.858           | 18.232          | 0.000           | 4.360           | 0.122           | 0.000           | 0.000           | 2.404           | 0.000           | 2.977           | 15.225 |
| 0.000           | 0.000           | 0.624           | 6.565           | 0.000           | 4.103           | 17.039          | 0.000           | 3.652           | 0.256           | 0.000           | 0.000           | 2.789           | 0.000           | 4.050           | 10.679 |
| 0.000           | 0.000           | 0.918           | 4.781           | 0.000           | 7.049           | 13.914          | 0.000           | 7.443           | 0.000           | 0.000           | 0.000           | 4.638           | 0.000           | 3.701           | 27.208 |
| 0.000           | 0.000           | 1.492           | 5.546           | 0.235           | 17.656          | 11.073          | 0.000           | 3.488           | 0.256           | 0.000           | 0.000           | 2.334           | 0.045           | 2.586           | 4.889  |
| 0.000           | 0.000           | 1.951           | 9.937           | 0.000           | 2.243           | 18.835          | 0.000           | 5.217           | 0.020           | 0.000           | 0.000           | 3.340           | 0.000           | 2.442           | 23.307 |
| 0.000           | 0.000           | 1.554           | 11.356          | 0.000           | 2.989           | 38.460          | 0.000           | 16.214          | 0.005           | 0.000           | 0.000           | 6.247           | 0.186           | 2.463           | 9.097  |
| 0.000           | 0.000           | 0.965           | 4.457           | 0.000           | 8.730           | 12.382          | 0.000           | 6.345           | 0.040           | 0.000           | 0.000           | 3.538           | 0.000           | 2.197           | 8.566  |
| 0.000           | 0.000           | 0.627           | 4.616           | 0.000           | 5.258           | 12.357          | 0.000           | 3.034           | 0.066           | 0.000           | 0.000           | 2.924           | 0.000           | 1.860           | 12.763 |
| 0.000           | 0.000           | 1.124           | 6.171           | 0.000           | 3.657           | 37.961          | 0.000           | 14.088          | 0.049           | 0.000           | 0.000           | 4.502           | 0.000           | 4.874           | 6.320  |
| 0.000           | 0.000           | 1.083           | 12.678          | 0.000           | 1.038           | 16.427          | 0.000           | 4.531           | 0.055           | 0.000           | 0.000           | 3.989           | 0.000           | 1.327           | 19.920 |
| 0.000           | 0.000           | 1.145           | 7.778           | 0.000           | 4.144           | 29.565          | 0.000           | 7.009           | 0.021           | 0.000           | 0.000           | 2.499           | 0.000           | 3.197           | 11.469 |
| 0.000           | 0.000           | 1.576           | 4.767           | 0.000           | 5.141           | 14.793          | 0.000           | 4.347           | 0.007           | 0.000           | 0.000           | 4.294           | 1.015           | 2.365           | 20.927 |
| 0.000           | 0.000           | 0.968           | 5.552           | 0.000           | 14.987          | 17.327          | 0.000           | 3.989           | 0.047           | 0.000           | 0.000           | 3.100           | 0.000           | 3.493           | 9.752  |
| 0.000           | 0.000           | 1.807           | 6.883           | 0.000           | 8.991           | 18.648          | 0.000           | 4.507           | 0.176           | 0.000           | 0.000           | 3.002           | 0.053           | 2.510           | 16.037 |
| 0.000           | 0.000           | 1.194           | 8.194           | 0.000           | 4.771           | 18.142          | 0.000           | 4.547           | 0.403           | 0.000           | 0.000           | 2.262           | 0.046           | 2.777           | 6.911  |
| 0.000           | 0.000           | 0.929           | 6.115           | 0.000           | 25.222          | 18.113          | 0.000           | 5.523           | 0.055           | 0.000           | 0.000           | 6.910           | 0.000           | 4.481           | 17.232 |
| 0.000           | 0.000           | 0.945           | 4.636           | 0.000           | 2.524           | 23.163          | 0.000           | 4.567           | 0.317           | 0.000           | 0.000           | 2.001           | 0.000           | 3.881           | 10.881 |
| 0.000           | 0.000           | 0.544           | 5.389           | 0.000           | 2.146           | 27.360          | 0.000           | 5.189           | 0.061           | 0.000           | 0.000           | 2.455           | 0.107           | 5.024           | 11.773 |
| 0.000           | 0.000           | 1.052           | 5.552           | 0.000           | 5.150           | 24.048          | 0.000           | 6.553           | 0.037           | 0.000           | 0.000           | 4.018           | 0.000           | 4.014           | 14.558 |
| 0.000           | 0.000           | 0.398           | 4.613           | 0.000           | 1.645           | 18.629          | 0.000           | 2.966           | 0.070           | 0.000           | 0.000           | 2.433           | 0.000           | 3.047           | 13.225 |
| 0.000           | 0.000           | 1.595           | 5.126           | 0.000           | 4.792           | 18.446          | 0.000           | 3.822           | 0.250           | 0.000           | 0.000           | 3.340           | 0.000           | 4.542           | 6.367  |
| 0.000           | 0.000           | 1.465           | 4.198           | 0.000           | 4.067           | 20.322          | 0.000           | 5.661           | 0.107           | 0.000           | 0.000           | 2.041           | 0.000           | 3.064           | 9.769  |
| 0.000           | 0.000           | 1.012           | 6.326           | 0.000           | 6.364           | 19.783          | 0.000           | 4.606           | 0.158           | 0.000           | 0.000           | 4.259           | 0.000           | 3.977           | 13.255 |
| 0.000           | 0.000           | 1.053           | 6.387           | 0.000           | 6.545           | 15.745          | 0.000           | 4.455           | 0.060           | 0.000           | 0.000           | 2.497           | 0.000           | 4.480           | 6.956  |
| 0.000           | 0.000           | 1.616           | 4.990           | 0.000           | 2.054           | 16.222          | 0.000           | 2.852           | 0.108           | 0.000           | 0.000           | 2.536           | 0.047           | 2.055           | 22.922 |
| 0.000           | 0.000           | 1.922           | 7.396           | 0.000           | 6.423           | 16.072          | 0.000           | 4.815           | 0.155           | 0.000           | 0.000           | 2.078           | 0.06            | 1.717           | 14.148 |
| 0.000           | 0.000           | 0.946           | 11.310          | 0.292           | 3.325           | 30.417          | 0.051           | 5.933           | 0.107           | 0.000           | 0.000           | 2.738           | 0.000           | 4.463           | 20.863 |
| 0.000           | 0.000           | 0.478           | 9.791           | 0.301           | 3.111           | 21.903          | 0.000           | 3.068           | 0.080           | 0.000           | 0.000           | 2.615           | 0.000           | 3.237           | 16.280 |
| 0.000           | 0.000           | 1.143           | 6.982           | 0.000           | 6.007           | 10.971          | 0.000           | 5.176           | 0.057           | 0.000           | 0.000           | 2.177           | 0.000           | 2.010           | 10.063 |
| 0.000           | 0.000           | 0.922           | 5.958           | 0.000           | 7.172           | 22.461          | 0.000           | 4.512           | 0.052           | 0.000           | 0.000           | 2.626           | 0.049           | 2.884           | 12.414 |
| 0.000           | 0.000           | 0.595           | 7.429           | 0.000           | 1.988           | 21.632          | 0.000           | 4.362           | 0.021           | 0.000           | 0.000           | 2.198           | 0.000           | 3.459           | 10.860 |
| 0.000           | 0.000           | 2.238           | 8.776           | 0.000           | 5.501           | 20.162          | 0.000           | 3.815           | 0.070           | 0.000           | 0.000           | 2.119           | 0.000           | 3.087           | 11.273 |
| 0.000           | 0.000           | 0.469           | 8.844           | 0.000           | 1.459           | 28.474          | 0.000           | 3.872           | 0.083           | 0.000           | 0.000           | 2.033           | 0.049           | 5.050           | 10.069 |
| 0.000           | 0.000           | 0.878           | 5.822           | 0.000           | 5.221           | 15.710          | 0.000           | 4.338           | 0.037           | 0.000           | 0.000           | 2.071           | 0.048           | 2.586           | 31.554 |
| 0.000           | 0.000           | 2.379           | 15.333          | 0.000           | 0.286           | 40.782          | 0.000           | 4.800           | 0.004           | 0.000           | 0.000           | 3.881           | 0.000           | 5.535           | 27.650 |
| 0.000           | 0.000           | 1.591           | 7.758           | 0.000           | 5.562           | 20.560          | 0.000           | 7.449           | 0.057           | 0.000           | 0.000           | 3.952           | 0.000           | 2.065           | 14.008 |
| 0.000           | 0.000           | 1.059           | 6.422           | 0.000           | 3.065           | 18.921          | 0.000           | 3.252           | 0.000           | 0.000           | 0.000           | 4.705           | 0.046           | 2.586           | 21.227 |
| 0.000           | 0.000           | 1.961           | 4.916           | 0.000           | 23.974          | 18.113          | 0.000           | 5.211           | 0.000           | 0.000           | 0.000           | 4.985           | 0.044           | 4.829           | 6.269  |
| 0.000           | 0.000           | 1.746           | 9.754           | 0.000           | 4.931           | 33.365          | 0.000           | 11.290          | 0.074           | 0.000           | 0.000           | 6.810           | 0.088           | 4.193           | 13.922 |
| 0.000           | 0.000           | 1.402           | 4.199           | 0.000           | 10.740          | 20.228          | 0.000           | 4.889           | 0.011           | 0.000           | 0.000           | 5.412           | 0.000           | 4.292           | 12.527 |
| 0.000           | 0.000           | 1.1051          | 7.053           | 0.000           | 3.809           | 27.866          | 0.000           | 6.945           | 0.052           | 0.000           | 0.000           | 4.360           | 0.048           | 2.143           | 22.843 |
| 0.000           | 0.000           | 0.264           | 4.751           | 0.000           | 7.045           | 14.725          | 0.000           | 3.201           | 0.052           | 0.000           | 0.000           | 3.247           | 0.000           | 3.964           | 8.791  |
| 0.000           | 0.000           | 0.238           | 8.776           | 0.000           | 0.812           | 20.945          | 0.000           | 7.629           | 0.021           | 0.000           | 0.000           | 11.565          | 0.000           | 2.443           | 22.463 |
| 0.000           | 0.000           | 0.885           | 4.144           | 14.098          | 0.000           | 1.693           | 25.899          | 0.000           | 8.114           | 0.016           | 0.000           | 11.823          | 0.000           | 2.251           | 15.546 |
| 0.000           | 0.000           | 0.920           | 6.831           | 0.000           | 5.616           | 21.874          | 0.000           | 3.480           | 0.019           | 0.000           | 0.000           | 3.522           | 0.000           | 4.577           | 9.967  |
| 0.000           | 0.000           | 0.930           | 6.745           | 0.000           | 4.588           | 15.876          | 0.087           | 5.164           | 0.059           | 0.000           | 0.000           | 5.642           | 0.000           | 2.846           | 17.064 |
| 0.000           | 0.000           | 0.813           | 8.204           | 0.000           | 5.060           | 18.912          | 0.000           | 7.367           | 0.080           | 0.000           | 0.000           | 5.080           | 0.000           | 3.285           | 29.053 |
| 0.000           | 0.000           | 1.304           | 7.750           | 0.000           | 4.381           | 20.116          | 0.000           | 3.484           | 0.034           | 0.000           | 0.000           | 4.474           | 0.000           | 2.459           | 21.527 |
| 0.000           | 0.000           | 0.945           | 11.310          | 0.292           | 3.325           | 30.417          | 0.051           | 5.933           | 0.107           | 0.000           | 0.000           | 2.738           | 0.000           | 4.463           | 20.863 |
| 0.000           | 0.000           | 0.034           | 7.230           | 0.000           | 2.873           | 31.039          | 0.000           | 4.571           | 0.037           | 0.000           | 0.000           | 3.933           | 0.081           | 3.533           | 13.531 |
| 0.000           | 0.000           | 0.913           | 10.553          | 0.441           | 1.272           | 22.086          | 0.000           | 3.215           | 0.019           | 0.000           | 0.000           | 3.744           | 0.042           | 2.200           | 13.333 |
| 0.000           | 0.000           | 0.367           | 4.976           | 0.236           | 8.308           | 24.056          | 0.000           | 3.519           | 0.059           | 0.000           | 0.000           | 2.990           | 0.000           | 5.092           | 20.654 |
| 0.000           | 0.000           | 0.815           | 10.927          | 0.263           | 1.876           | 28.905          | 0.000           | 5.162           | 0.326           | 0.000           | 0.000           | 2.494           | 0.000           | 5.417           | 16.201 |
| 0.000           | 0.000           | 0.501           | 8.776           | 0.000           | 2.484           | 21.165          | 0.000           | 5.366           | 0.070           | 0.000           | 0.000           | 6.016           | 0.000           | 3.087           | 11.273 |
| 0.000           | 0.000           | 0.464           | 8.302           | 0.000           | 2.508           | 18.711          | 0.000           | 8.813           | 0.041           | 0.000           | 0.000           | 4.929           | 0.000           | 4.022           | 22.766 |
| 0.000           | 0.000           | 0.378           | 6.002           | 0.000           | 1.112           | 21.865          | 0.000           | 3.730           | 0.000           | 0.000           | 0.000           | 5.696           | 0.000           | 6.765           | 12.608 |
| 0.000           | 0.000           | 1.385           | 6.233           | 0.000           | 2.653           | 19.204          | 0.000           | 4.394           | 0.012           | 0.000           | 0.000           | 4.915           | 0.000           | 2.936           | 22.444 |
| 0.000           | 0.000           | 0.709           | 5.463           | 0.000           | 4.401           | 25.673          | 0.000           | 5.690           | 0.033           | 0.000           | 0.000           | 5.694           | 0.000           | 9.223           | 15.449 |
| 0.000           | 0.000           | 0.038           | 6.345           | 0.237           | 5.462           | 17.250          | 0.000           | 3.796           | 0.021           | 0.000           | 0.000           | 3.962           | 0.000           | 1.935           | 14.837 |
| 0.000           | 0.000           | 0.945           | 11.310          | 0.292           | 3.325           | 30.417          | 0.051           | 5.933           | 0.107           | 0.000           | 0.000           | 2.738           | 0.000           | 4.463           | 20.863 |
| 0.000           | 0.00            |                 |                 |                 |                 |                 |                 |                 |                 |                 |                 |                 |                 |                 |        |



| ENSG00000264769 | ENSG00000224711 | ENSG00000124613 | ENSG00000261621 | ENSG00000274569 | ENSG00000240882 | ENSG00000198824 | ENSG00000244230 | ENSG00000268005 | ENSG00000135740 | ENSG00000261553 | ENSG00000223883 | ENSG00000146122 | ENSG00000201086 | ENSG00000278322 | ENSG00000238616 |
|-----------------|-----------------|-----------------|-----------------|-----------------|-----------------|-----------------|-----------------|-----------------|-----------------|-----------------|-----------------|-----------------|-----------------|-----------------|-----------------|
| 0.440           | 0.000           | 1.075           | 0.000           | 0.000           | 0.343           | 5.993           | 0.000           | 0.000           | 0.502           | 0.101           | 0.000           | 13.935          | 0.000           | 0.044           | 0.000           |
| 0.150           | 0.000           | 0.609           | 0.009           | 0.000           | 0.103           | 3.350           | 0.000           | 0.000           | 0.804           | 0.081           | 0.000           | 3.564           | 0.000           | 0.037           | 0.000           |
| 0.133           | 0.000           | 1.484           | 0.000           | 0.047           | 0.214           | 13.858          | 0.000           | 0.000           | 0.712           | 0.126           | 0.000           | 2.576           | 0.000           | 0.000           | 0.000           |
| 0.377           | 0.000           | 1.859           | 0.000           | 0.053           | 0.259           | 9.055           | 0.000           | 0.000           | 1.120           | 0.076           | 0.000           | 18.223          | 0.000           | 0.000           | 0.000           |
| 0.042           | 0.000           | 1.811           | 0.000           | 0.000           | 0.075           | 6.075           | 0.000           | 0.046           | 0.475           | 0.046           | 0.000           | 2.763           | 0.000           | 0.042           | 0.000           |
| 0.563           | 0.000           | 1.281           | 0.004           | 0.053           | 0.258           | 13.838          | 0.006           | 0.000           | 0.535           | 0.030           | 0.000           | 9.753           | 0.000           | 0.000           | 0.000           |
| 0.187           | 0.000           | 1.160           | 0.013           | 0.000           | 0.154           | 4.723           | 0.000           | 0.000           | 1.446           | 0.111           | 0.000           | 1.695           | 0.000           | 0.037           | 0.000           |
| 0.079           | 0.000           | 1.443           | 0.000           | 0.000           | 0.091           | 4.224           | 0.078           | 0.000           | 0.484           | 0.144           | 0.000           | 20.064          | 0.000           | 0.000           | 0.000           |
| 0.000           | 0.000           | 0.770           | 0.005           | 0.000           | 0.188           | 4.394           | 0.181           | 0.000           | 0.528           | 0.172           | 0.000           | 7.554           | 0.000           | 0.000           | 0.000           |
| 0.133           | 0.000           | 0.634           | 0.000           | 0.167           | 0.304           | 3.977           | 0.000           | 0.000           | 0.703           | 0.179           | 0.000           | 3.483           | 0.000           | 0.000           | 0.000           |
| 0.457           | 0.000           | 0.763           | 0.000           | 0.150           | 0.150           | 4.388           | 0.130           | 0.000           | 1.748           | 0.138           | 0.000           | 7.408           | 0.000           | 0.000           | 0.000           |
| 0.405           | 0.000           | 1.258           | 0.012           | 0.095           | 0.201           | 8.470           | 0.000           | 0.000           | 0.407           | 0.182           | 0.000           | 4.419           | 0.000           | 0.033           | 0.000           |
| 0.244           | 0.000           | 1.915           | 0.012           | 0.246           | 0.224           | 7.818           | 0.069           | 0.000           | 0.521           | 0.141           | 0.000           | 29.602          | 0.000           | 0.000           | 0.000           |
| 0.261           | 0.000           | 2.417           | 0.004           | 0.000           | 0.164           | 4.884           | 0.065           | 0.000           | 0.884           | 0.057           | 0.000           | 36.777          | 0.154           | 0.000           | 0.000           |
| 0.145           | 0.000           | 1.116           | 0.000           | 0.000           | 0.133           | 6.583           | 0.000           | 0.000           | 0.377           | 0.039           | 0.000           | 13.996          | 0.000           | 0.000           | 0.000           |
| 0.620           | 0.000           | 1.189           | 0.004           | 0.046           | 0.105           | 6.747           | 0.000           | 0.000           | 0.400           | 0.114           | 0.000           | 16.430          | 0.000           | 0.065           | 0.000           |
| 0.113           | 0.000           | 1.441           | 0.000           | 0.000           | 0.259           | 10.973          | 0.075           | 0.000           | 0.845           | 0.182           | 0.000           | 2.684           | 0.000           | 0.000           | 0.000           |
| 0.045           | 0.000           | 0.411           | 0.000           | 0.000           | 0.266           | 7.254           | 0.089           | 0.035           | 1.577           | 0.138           | 0.000           | 16.977          | 0.000           | 0.000           | 0.000           |
| 0.068           | 0.000           | 0.550           | 0.008           | 0.000           | 0.140           | 3.150           | 0.135           | 0.000           | 0.727           | 0.073           | 0.000           | 9.370           | 0.000           | 0.034           | 0.000           |
| 0.254           | 0.000           | 0.922           | 0.000           | 0.000           | 0.317           | 9.450           | 0.144           | 0.000           | 0.370           | 0.142           | 0.000           | 7.145           | 0.000           | 0.036           | 0.000           |
| 0.000           | 0.000           | 0.906           | 0.009           | 0.000           | 0.142           | 2.733           | 0.616           | 0.000           | 0.458           | 0.156           | 0.000           | 11.967          | 0.000           | 0.000           | 0.000           |
| 0.720           | 0.000           | 1.431           | 0.005           | 0.000           | 0.184           | 10.614          | 0.080           | 0.000           | 1.108           | 0.248           | 0.000           | 25.515          | 0.000           | 0.000           | 0.000           |
| 0.078           | 0.000           | 1.626           | 0.004           | 0.000           | 0.287           | 9.025           | 0.156           | 0.000           | 0.557           | 0.105           | 0.000           | 8.649           | 0.000           | 0.039           | 0.000           |
| 0.067           | 0.000           | 0.655           | 0.008           | 0.094           | 0.137           | 6.591           | 0.066           | 0.000           | 0.628           | 0.031           | 0.000           | 2.095           | 0.000           | 0.000           | 0.000           |
| 0.111           | 0.000           | 1.126           | 0.000           | 0.000           | 0.102           | 6.139           | 0.000           | 0.000           | 0.385           | 0.135           | 0.000           | 6.130           | 0.000           | 0.000           | 0.000           |
| 0.616           | 0.000           | 2.050           | 0.018           | 0.054           | 0.265           | 10.047          | 0.000           | 0.000           | 0.908           | 0.208           | 0.000           | 28.844          | 0.000           | 0.000           | 0.000           |
| 0.174           | 0.000           | 1.638           | 0.015           | 0.000           | 0.360           | 4.421           | 0.347           | 0.000           | 1.593           | 0.076           | 0.000           | 15.812          | 0.000           | 0.000           | 0.000           |
| 0.283           | 0.000           | 1.527           | 0.009           | 0.000           | 0.633           | 4.879           | 0.325           | 0.000           | 0.816           | 0.165           | 0.000           | 6.408           | 0.000           | 0.000           | 0.000           |
| 0.306           | 0.000           | 1.899           | 0.035           | 0.000           | 0.140           | 4.660           | 0.152           | 0.000           | 1.123           | 0.077           | 0.000           | 27.562          | 0.000           | 0.076           | 0.000           |
| 0.269           | 0.000           | 1.016           | 0.022           | 0.108           | 0.123           | 7.741           | 0.000           | 0.000           | 1.181           | 0.057           | 0.000           | 7.114           | 0.000           | 0.000           | 0.000           |
| 0.063           | 0.000           | 1.406           | 0.000           | 0.045           | 0.232           | 5.762           | 0.189           | 0.000           | 0.709           | 0.170           | 0.000           | 2.279           | 0.000           | 0.000           | 0.000           |
| 0.662           | 0.000           | 2.464           | 0.011           | 0.000           | 0.137           | 7.160           | 0.263           | 0.000           | 0.974           | 0.120           | 0.000           | 1.923           | 0.000           | 0.000           | 0.000           |
| 0.077           | 0.000           | 1.051           | 0.000           | 0.000           | 0.144           | 10.443          | 0.077           | 0.000           | 0.845           | 0.153           | 0.000           | 11.771          | 0.000           | 0.000           | 0.000           |
| 0.074           | 0.000           | 1.427           | 0.046           | 0.000           | 0.119           | 4.846           | 0.074           | 0.000           | 0.791           | 0.140           | 0.033           | 2.985           | 0.000           | 0.000           | 0.000           |
| 0.392           | 0.000           | 2.667           | 0.009           | 0.000           | 0.216           | 10.828          | 0.156           | 0.000           | 0.301           | 0.053           | 0.000           | 3.641           | 0.000           | 0.000           | 0.000           |
| 0.391           | 0.000           | 2.226           | 0.028           | 0.050           | 0.114           | 7.273           | 0.000           | 0.000           | 0.971           | 0.129           | 0.000           | 9.173           | 0.000           | 0.035           | 0.000           |
| 1.018           | 0.000           | 3.062           | 0.209           | 0.048           | 0.311           | 5.252           | 0.135           | 0.000           | 2.481           | 0.046           | 0.000           | 160.458         | 0.160           | 0.000           | 0.000           |
| 0.339           | 0.000           | 1.405           | 0.004           | 0.048           | 0.202           | 8.346           | 0.000           | 0.000           | 0.658           | 0.160           | 0.000           | 15.713          | 0.000           | 0.000           | 0.000           |
| 0.000           | 0.000           | 2.627           | 0.000           | 0.000           | 0.130           | 10.920          | 0.000           | 0.000           | 0.983           | 0.125           | 0.000           | 9.622           | 0.000           | 0.040           | 0.000           |
| 0.543           | 0.000           | 1.449           | 0.000           | 0.059           | 0.077           | 9.971           | 0.166           | 0.000           | 0.607           | 0.090           | 0.000           | 3.720           | 0.000           | 0.083           | 0.000           |
| 0.748           | 0.000           | 1.123           | 0.005           | 0.059           | 0.076           | 7.554           | 0.165           | 0.000           | 0.708           | 0.159           | 0.000           | 8.637           | 0.000           | 0.041           | 0.000           |
| 0.737           | 0.000           | 2.249           | 0.088           | 0.050           | 0.145           | 7.958           | 1.886           | 0.000           | 1.302           | 0.027           | 0.000           | 4.034           | 0.000           | 0.000           | 0.000           |
| 0.270           | 0.000           | 2.003           | 0.000           | 0.109           | 0.124           | 9.269           | 0.000           | 0.000           | 0.373           | 0.062           | 0.000           | 3.670           | 0.000           | 0.000           | 0.000           |
| 0.464           | 0.000           | 2.260           | 0.004           | 0.047           | 0.122           | 10.165          | 0.000           | 0.000           | 0.451           | 0.060           | 0.000           | 5.463           | 0.157           | 0.000           | 0.359           |
| 1.090           | 0.000           | 3.198           | 0.020           | 0.000           | 0.178           | 10.629          | 0.000           | 0.000           | 0.851           | 0.090           | 0.000           | 4.340           | 0.000           | 0.000           | 0.000           |
| 0.483           | 0.000           | 2.814           | 0.008           | 0.000           | 0.190           | 10.306          | 0.137           | 0.000           | 1.393           | 0.046           | 0.000           | 166.087         | 0.326           | 0.000           | 0.000           |
| 1.784           | 0.000           | 1.813           | 0.095           | 0.589           | 0.192           | 8.731           | 0.000           | 0.000           | 1.132           | 0.041           | 0.034           | 13.127          | 0.000           | 0.113           | 0.000           |
| 0.384           | 0.000           | 1.602           | 0.009           | 0.217           | 0.300           | 10.666          | 0.076           | 0.000           | 0.950           | 0.083           | 0.000           | 14.909          | 0.000           | 0.000           | 0.000           |
| 0.200           | 0.000           | 2.173           | 0.023           | 0.000           | 0.138           | 11.853          | 0.000           | 0.000           | 0.547           | 0.081           | 0.000           | 3.882           | 0.000           | 0.000           | 0.000           |
| 0.283           | 0.000           | 0.403           | 0.000           | 0.000           | 0.087           | 4.945           | 0.188           | 0.000           | 0.238           | 0.167           | 0.000           | 13.378          | 0.446           | 0.000           | 0.000           |
| 0.348           | 0.000           | 1.234           | 0.007           | 0.045           | 0.305           | 7.507           | 0.063           | 0.000           | 0.864           | 0.239           | 0.000           | 18.032          | 0.000           | 0.000           | 0.000           |
| 0.068           | 0.000           | 1.010           | 0.000           | 0.000           | 0.172           | 3.838           | 0.068           | 0.000           | 0.353           | 0.105           | 0.000           | 3.112           | 0.000           | 0.000           | 0.000           |
| 0.139           | 0.000           | 2.255           | 0.004           | 0.049           | 0.159           | 10.135          | 0.069           | 0.000           | 0.554           | 0.173           | 0.000           | 7.679           | 0.000           | 0.000           | 0.000           |
| 0.245           | 0.000           | 1.594           | 0.000           | 0.043           | 0.225           | 5.859           | 0.122           | 0.000           | 0.188           | 0.045           | 0.000           | 4.687           | 0.000           | 0.000           | 0.000           |
| 0.169           | 0.000           | 1.050           | 0.000           | 0.000           | 0.141           | 10.920          | 0.000           | 0.000           | 0.501           | 0.126           | 0.000           | 2.988           | 0.000           | 0.000           | 0.000           |
| 0.000           | 0.000           | 2.873           | 0.000           | 0.000           | 0.202           | 5.840           | 0.876           | 0.000           | 0.220           | 0.000           | 0.000           | 99.091          | 0.000           | 0.000           | 0.000           |
| 0.255           | 0.000           | 2.130           | 0.000           | 0.051           | 0.151           | 9.999           | 0.073           | 0.000           | 0.542           | 0.054           | 0.000           | 1.052           | 0.000           | 0.072           | 0.000           |
| 0.241           | 0.000           | 1.032           | 0.008           | 0.049           | 0.332           | 6.940           | 0.000           | 0.000           | 0.487           | 0.051           | 0.000           | 6.825           | 0.000           | 0.034           | 0.000           |
| 0.480           | 0.000           | 0.798           | 0.004           | 0.145           | 0.189           | 9.671           | 0.068           | 0.000           | 0.399           | 0.083           | 0.000           | 10.997          | 0.000           | 0.000           | 0.000           |
| 0.128           | 0.000           | 2.401           | 0.000           | 0.226           | 0.161           | 5.303           | 0.000           | 0.000           | 0.139           | 0.034           | 0.000           | 33.787          | 0.000           | 0.000           | 0.000           |
| 0.000           | 0.000           | 1.369           | 0.000           | 0.000           | 0.152           | 11.141          | 0.000           | 0.000           | 0.983           | 0.125           | 0.000           | 70.829          | 0.000           | 0.047           | 0.000           |
| 0.000           | 0.000           | 1.488           | 0.007           | 0.000           | 0.242           | 7.327           | 0.117           | 0.000           | 0.719           | 0.118           | 0.000           | 2.318           | 0.000           | 0.058           | 0.000           |
| 0.244           | 0.000           | 2.275           | 0.010           | 0.000           | 0.350           | 9.293           | 0.121           | 0.000           | 1.119           | 0.148           | 0.000           | 24.199          | 0.000           | 0.000           | 0.000           |
| 0.851           | 0.000           | 2.184           | 0.004           | 0.092           | 0.285           | 8.884           | 0.000           | 0.000           | 1.173           | 0.075           | 0.088           | 2.831           | 0.000           | 0.000           | 0.000           |
| 0.219           | 0.000           | 2.488           | 0.029           | 0.000           | 0.201           | 9.507           | 0.000           | 0.000           | 0.261           | 0.113           | 0.033           | 37.528          | 0.000           | 0.000           | 0.000           |
| 0.046           | 0.000           | 0.748           | 0.000           | 0.000           | 0.047           | 6.748           | 0.000           | 0.000           | 0.676           | 0.068           | 0.000           | 16.814          | 0.000           | 0.157           | 0.000           |
| 1.129           | 0.000           | 1.048           | 0.000           | 0.000           | 0.265           | 8.181           | 0.384           | 0.000           | 0.247           | 0.123           | 0.000           | 4.369           | 0.000           | 0.000           | 0.000           |
| 0.043           | 0.000           | 1.003           | 0.000           | 0.000           | 0.157           | 4.639           | 0.085           | 0.000           | 0.294           | 0.115           | 0.000           | 0.940           | 0.000           | 0.000           | 0.000           |
| 0.114           | 0.000           | 2.667           | 0.000           | 0.000           | 0.368           | 12.327          | 0.000           | 0.000           | 0.225           | 0.038           | 0.000           | 1.495           | 0.000           | 0.000           | 0.000           |
| 0.000           | 0.000           | 1.111           | 0.000           | 0.000           | 0.165           | 3.207           | 0.358           | 0.000           | 0.056           | 0.079           | 0.040           | 1.827           | 0.000           | 0.000           | 0.000           |
| 0.033           | 0.000           | 1.100           | 0.000           | 0.000           | 0.075           | 9.328           | 0.131           | 0.000           | 0.204           | 0.053           | 0.000           | 1.654           | 0.000           | 0.033           | 0.000           |
| 0.283           | 0.000           | 1.283           | 0.000           | 0.000           | 0.130           | 10.920          | 0.000           | 0.000           | 0.983           | 0.125           | 0.000           | 15.958          | 0.000           | 0.000           | 0.000           |
| 0.301           | 0.000           | 1.519           | 0.003           | 0.042           | 0.083           | 5.217           | 0.000           | 0.000           | 0.690           |                 |                 |                 |                 |                 |                 |

| ENSG00000227973 | ENSG00000228985 | ENSG00000222059 | ENSG00000248537 | ENSG00000225494 | ENSG00000230377 | ENSG00000105497 | ENSG00000204287 | ENSG00000278983 | ENSG00000138722 | ENSG00000254917 | ENSG00000268744 | ENSG00000238066 | ENSG00000126758 | ENSG00000202478 |
|-----------------|-----------------|-----------------|-----------------|-----------------|-----------------|-----------------|-----------------|-----------------|-----------------|-----------------|-----------------|-----------------|-----------------|-----------------|
| 0.875           | 0.015           | 0.771           | 0.063           | 0.000           | 0.000           | 1.810           | 803.874         | 0.091           | 1.114           | 0.000           | 0.057           | 0.000           | 0.000           | 16.611          |
| 0.744           | 0.000           | 0.510           | 0.054           | 0.000           | 0.000           | 1.169           | 1441.366        | 0.053           | 0.260           | 0.000           | 0.049           | 0.000           | 0.000           | 16.776          |
| 0.804           | 0.000           | 0.454           | 0.000           | 0.000           | 0.000           | 2.421           | 773.243         | 0.193           | 2.230           | 0.019           | 0.094           | 0.044           | 0.000           | 18.314          |
| 0.589           | 0.000           | 2.863           | 0.054           | 0.000           | 0.000           | 2.550           | 357.904         | 0.126           | 0.851           | 0.000           | 0.115           | 0.000           | 0.000           | 9.584           |
| 1.182           | 0.000           | 1.334           | 0.000           | 0.000           | 0.000           | 1.404           | 1057.601        | 0.247           | 0.404           | 0.000           | 0.056           | 0.000           | 0.000           | 19.267          |
| 0.942           | 0.009           | 0.774           | 0.000           | 0.000           | 0.000           | 3.707           | 857.270         | 0.126           | 0.220           | 0.000           | 0.086           | 0.087           | 0.000           | 19.051          |
| 0.477           | 0.021           | 0.509           | 0.000           | 0.000           | 0.000           | 1.644           | 2916.180        | 0.053           | 0.983           | 0.000           | 0.040           | 0.049           | 0.000           | 15.978          |
| 0.449           | 0.011           | 0.307           | 0.000           | 0.000           | 0.000           | 1.102           | 1436.470        | 0.113           | 2.568           | 0.023           | 0.086           | 0.000           | 0.000           | 9.955           |
| 0.389           | 0.000           | 0.533           | 0.000           | 0.000           | 0.000           | 1.944           | 797.114         | 0.036           | 1.225           | 0.000           | 0.129           | 0.060           | 0.000           | 9.414           |
| 0.981           | 0.000           | 1.293           | 0.000           | 0.000           | 0.000           | 1.111           | 2855.521        | 0.021           | 2.116           | 0.000           | 0.086           | 0.000           | 0.000           | 14.302          |
| 0.720           | 0.000           | 1.334           | 0.000           | 0.000           | 0.000           | 1.839           | 1057.988        | 0.021           | 0.733           | 0.019           | 0.057           | 0.000           | 0.000           | 11.511          |
| 0.347           | 0.010           | 0.271           | 0.000           | 0.000           | 0.000           | 1.801           | 796.535         | 0.171           | 2.335           | 0.000           | 0.081           | 0.089           | 0.000           | 12.107          |
| 0.648           | 0.000           | 0.317           | 0.000           | 0.000           | 0.000           | 2.805           | 844.033         | 0.083           | 1.787           | 0.000           | 0.083           | 0.000           | 0.000           | 7.913           |
| 0.825           | 0.000           | 0.1414          | 0.000           | 0.000           | 0.000           | 3.043           | 693.943         | 0.010           | 0.849           | 0.000           | 0.127           | 0.043           | 0.000           | 9.856           |
| 0.510           | 0.000           | 0.191           | 0.000           | 0.000           | 0.000           | 1.459           | 1088.162        | 0.115           | 1.053           | 0.000           | 0.126           | 0.000           | 0.000           | 9.314           |
| 0.929           | 0.000           | 0.147           | 0.000           | 0.000           | 0.000           | 2.157           | 1586.481        | 0.062           | 1.273           | 0.000           | 0.065           | 0.000           | 0.000           | 19.817          |
| 0.444           | 0.000           | 1.044           | 0.000           | 0.000           | 0.000           | 1.756           | 179.581         | 0.263           | 1.594           | 0.000           | 0.085           | 0.000           | 0.000           | 8.610           |
| 0.628           | 0.000           | 0.596           | 0.049           | 0.000           | 0.000           | 1.945           | 1445.507        | 0.028           | 0.575           | 0.000           | 0.128           | 0.000           | 0.000           | 9.438           |
| 0.465           | 0.000           | 0.424           | 0.000           | 0.000           | 0.000           | 1.738           | 1038.604        | 0.016           | 1.777           | 0.040           | 0.103           | 0.000           | 0.000           | 10.353          |
| 0.628           | 0.011           | 0.528           | 0.000           | 0.000           | 0.000           | 2.051           | 428.812         | 0.081           | 1.180           | 0.021           | 0.079           | 0.143           | 0.000           | 8.950           |
| 0.628           | 0.000           | 0.147           | 0.000           | 0.000           | 0.000           | 1.341           | 612.762         | 0.049           | 0.878           | 0.000           | 0.101           | 0.000           | 0.000           | 7.297           |
| 0.945           | 0.011           | 0.381           | 0.056           | 0.020           | 0.000           | 2.872           | 158.239         | 0.171           | 0.372           | 0.023           | 0.087           | 0.210           | 0.000           | 16.559          |
| 0.757           | 0.000           | 0.454           | 0.096           | 0.000           | 0.000           | 1.452           | 1403.670        | 0.188           | 0.683           | 0.000           | 0.051           | 0.051           | 0.000           | 8.979           |
| 0.684           | 0.011           | 0.361           | 0.053           | 0.000           | 0.000           | 0.950           | 739.044         | 0.016           | 0.588           | 0.000           | 0.072           | 0.000           | 0.000           | 13.757          |
| 0.438           | 0.000           | 0.525           | 0.055           | 0.000           | 0.000           | 2.013           | 910.760         | 0.147           | 2.876           | 0.000           | 0.008           | 0.049           | 0.000           | 10.921          |
| 0.495           | 0.000           | 0.953           | 0.063           | 0.000           | 0.000           | 2.345           | 529.134         | 0.183           | 1.200           | 0.000           | 0.033           | 0.152           | 0.000           | 10.182          |
| 1.308           | 0.022           | 0.868           | 0.045           | 0.000           | 0.000           | 2.195           | 147.685         | 0.035           | 1.428           | 0.000           | 0.114           | 0.000           | 0.000           | 8.631           |
| 0.708           | 0.011           | 0.372           | 0.000           | 0.000           | 0.000           | 1.353           | 403.517         | 0.130           | 2.734           | 0.000           | 0.050           | 0.100           | 0.000           | 12.442          |
| 1.201           | 0.000           | 0.224           | 0.055           | 0.000           | 0.000           | 2.404           | 728.563         | 0.364           | 0.457           | 0.000           | 0.182           | 0.100           | 0.000           | 7.950           |
| 0.943           | 0.000           | 0.471           | 0.091           | 0.000           | 0.000           | 2.336           | 439.723         | 0.293           | 0.852           | 0.000           | 0.092           | 0.151           | 0.000           | 7.848           |
| 0.753           | 0.000           | 0.774           | 0.000           | 0.000           | 0.000           | 1.010           | 762.672         | 0.030           | 1.808           | 0.018           | 0.082           | 0.000           | 0.000           | 7.397           |
| 0.602           | 0.000           | 0.126           | 0.000           | 0.000           | 0.000           | 1.956           | 203.204         | 0.236           | 0.805           | 0.000           | 0.180           | 0.217           | 0.000           | 9.083           |
| 0.581           | 0.000           | 0.434           | 0.053           | 0.000           | 0.000           | 1.958           | 655.325         | 0.023           | 0.673           | 0.000           | 0.142           | 0.000           | 0.000           | 11.221          |
| 0.669           | 0.000           | 0.458           | 0.000           | 0.000           | 0.000           | 1.465           | 1177.612        | 0.342           | 1.157           | 0.022           | 0.113           | 0.097           | 0.000           | 8.114           |
| 0.404           | 0.010           | 0.346           | 0.000           | 0.018           | 0.000           | 1.033           | 479.349         | 0.112           | 1.643           | 0.000           | 0.051           | 0.000           | 0.000           | 13.217          |
| 1.061           | 0.039           | 0.727           | 0.000           | 0.000           | 0.000           | 1.766           | 662.510         | 0.085           | 1.426           | 0.000           | 0.023           | 0.140           | 0.000           | 11.020          |
| 0.674           | 0.000           | 0.330           | 0.000           | 0.017           | 0.000           | 3.068           | 319.562         | 0.221           | 0.385           | 0.000           | 0.125           | 0.134           | 0.071           | 11.803          |
| 0.804           | 0.000           | 0.868           | 0.045           | 0.000           | 0.000           | 2.834           | 1505.509        | 0.172           | 0.478           | 0.000           | 0.132           | 0.000           | 0.000           | 10.657          |
| 1.247           | 0.000           | 0.244           | 0.000           | 0.000           | 0.000           | 1.799           | 619.796         | 0.040           | 0.818           | 0.000           | 0.054           | 0.000           | 0.000           | 11.824          |
| 0.591           | 0.000           | 0.324           | 0.060           | 0.000           | 0.000           | 2.358           | 284.024         | 0.199           | 1.882           | 0.000           | 0.073           | 0.000           | 0.000           | 19.481          |
| 0.449           | 0.000           | 0.547           | 0.000           | 0.000           | 0.000           | 1.218           | 664.899         | 0.028           | 1.753           | 0.000           | 0.027           | 0.055           | 0.000           | 12.004          |
| 0.440           | 0.000           | 0.226           | 0.000           | 0.000           | 0.000           | 1.251           | 376.258         | 0.167           | 3.136           | 0.000           | 0.030           | 0.000           | 0.000           | 10.555          |
| 0.424           | 0.000           | 0.256           | 0.000           | 0.000           | 0.000           | 3.650           | 387.899         | 0.061           | 3.538           | 0.000           | 0.092           | 0.051           | 0.000           | 10.316          |
| 1.156           | 0.000           | 0.689           | 0.000           | 0.000           | 0.000           | 2.266           | 250.738         | 0.158           | 1.362           | 0.000           | 0.044           | 0.044           | 0.000           | 16.942          |
| 0.490           | 0.000           | 0.338           | 0.000           | 0.000           | 0.000           | 4.283           | 593.115         | 0.073           | 3.131           | 0.000           | 0.092           | 0.100           | 0.000           | 10.946          |
| 0.540           | 0.000           | 1.183           | 0.000           | 0.000           | 0.000           | 1.968           | 740.453         | 0.060           | 1.095           | 0.020           | 0.067           | 0.136           | 0.000           | 9.747           |
| 1.202           | 0.000           | 0.748           | 0.000           | 0.000           | 0.000           | 0.838           | 46.049          | 0.188           | 1.222           | 0.000           | 0.058           | 0.100           | 0.000           | 28.903          |
| 0.758           | 0.000           | 0.909           | 0.000           | 0.000           | 0.000           | 2.796           | 457.889         | 0.335           | 2.049           | 0.000           | 0.050           | 0.252           | 0.000           | 15.112          |
| 1.207           | 0.000           | 0.868           | 0.045           | 0.000           | 0.000           | 2.358           | 487.685         | 0.037           | 1.212           | 0.000           | 0.063           | 0.000           | 0.000           | 12.247          |
| 0.765           | 0.000           | 0.986           | 0.046           | 0.000           | 0.000           | 2.286           | 228.881         | 0.040           | 1.353           | 0.000           | 0.109           | 0.274           | 0.000           | 12.740          |
| 1.016           | 0.000           | 1.126           | 0.000           | 0.000           | 0.000           | 1.738           | 412.492         | 0.025           | 2.023           | 0.018           | 0.096           | 0.083           | 0.000           | 10.931          |
| 1.182           | 0.000           | 1.080           | 0.000           | 0.000           | 0.000           | 1.463           | 1909.938        | 0.027           | 3.302           | 0.000           | 0.052           | 0.000           | 0.000           | 11.582          |
| 0.783           | 0.000           | 0.716           | 0.000           | 0.000           | 0.000           | 1.963           | 1623.489        | 0.033           | 2.976           | 0.000           | 0.128           | 0.000           | 0.000           | 12.898          |
| 1.202           | 0.000           | 0.428           | 0.000           | 0.000           | 0.000           | 3.374           | 898.588         | 0.034           | 1.855           | 0.000           | 0.146           | 1.406           | 0.000           | 10.904          |
| 0.626           | 0.042           | 1.144           | 0.000           | 0.000           | 0.000           | 1.426           | 191.125         | 0.156           | 1.020           | 0.000           | 0.074           | 0.000           | 0.000           | 11.624          |
| 0.571           | 0.000           | 0.284           | 0.105           | 0.000           | 0.000           | 1.945           | 209.578         | 0.000           | 1.425           | 0.000           | 0.084           | 0.000           | 0.000           | 21.346          |
| 1.275           | 0.000           | 0.470           | 0.000           | 0.000           | 0.000           | 1.614           | 406.208         | 0.075           | 1.264           | 0.000           | 0.055           | 0.000           | 0.000           | 11.283          |
| 1.413           | 0.010           | 0.200           | 0.000           | 0.000           | 0.000           | 2.347           | 551.082         | 0.088           | 2.762           | 0.000           | 0.052           | 0.091           | 0.072           | 11.972          |
| 1.636           | 0.009           | 0.311           | 0.000           | 0.016           | 0.000           | 1.677           | 451.038         | 0.109           | 2.612           | 0.000           | 0.052           | 0.090           | 0.000           | 19.025          |
| 0.917           | 0.000           | 1.142           | 0.000           | 0.000           | 0.000           | 2.219           | 1039.128        | 0.000           | 0.519           | 0.019           | 0.090           | 0.000           | 0.067           | 9.073           |
| 0.911           | 0.009           | 0.357           | 0.000           | 0.000           | 0.000           | 1.444           | 525.144         | 0.045           | 1.752           | 0.040           | 0.040           | 0.000           | 0.000           | 11.524          |
| 0.884           | 0.009           | 0.829           | 0.000           | 0.000           | 0.000           | 2.133           | 1081.801        | 0.112           | 1.366           | 0.054           | 0.051           | 0.000           | 0.123           | 8.819           |
| 0.985           | 0.000           | 0.751           | 0.000           | 0.000           | 0.000           | 2.379           | 194.337         | 0.436           | 0.923           | 0.018           | 0.073           | 0.160           | 0.000           | 9.131           |
| 0.933           | 0.000           | 0.491           | 0.000           | 0.000           | 0.000           | 1.711           | 783.002         | 0.119           | 1.679           | 0.000           | 0.021           | 0.043           | 0.000           | 12.358          |
| 0.822           | 0.000           | 0.501           | 0.000           | 0.000           | 0.000           | 1.744           | 178.091         | 0.029           | 2.542           | 0.000           | 0.016           | 0.000           | 0.000           | 12.405          |
| 0.670           | 0.000           | 0.334           | 0.000           | 0.000           | 0.000           | 4.461           | 441.538         | 0.036           | 0.596           | 0.000           | 0.044           | 0.044           | 0.000           | 6.962           |
| 1.053           | 0.000           | 0.555           | 0.000           | 0.000           | 0.000           | 2.827           | 526.017         | 0.031           | 1.445           | 0.000           | 0.037           | 0.056           | 0.000           | 6.793           |
| 1.024           | 0.013           | 0.088           | 0.000           | 0.000           | 0.000           | 2.130           | 218.445         | 0.027           | 0.644           | 0.000           | 0.167           | 0.000           | 0.000           | 5.749           |
| 0.653           | 0.009           | 0.447           | 0.000           | 0.000           | 0.000           | 2.823           | 775.580         | 0.027           | 1.717           | 0.000           | 0.062           | 0.000           | 0.000           | 9.926           |
| 0.822           | 0.000           | 0.751           | 0.000           | 0.000           | 0.000           | 1.117           | 1635.627        | 0.021           | 0.818           | 0.026           | 0.059           | 0.000           | 0.000           | 9.433           |
| 0.726           | 0.009           | 0.820           | 0.000           | 0.000           | 0.000           | 1.838           | 619.026         | 0.010           | 1.548           | 0.000           | 0.057           | 0.000           | 0.000           | 10.530          |
| 0.842           | 0.000           | 0.231           | 0.000           | 0.000           | 0.000           | 1.033           | 946.159         | 0.029           | 2.813           | 0.000           | 0.029           | 0.067           | 0.000           | 8.863           |
| 0.193           | 0.026           | 0.264           | 0.000           | 0.000           | 0.000           | 1.139           | 1054.044        | 0.005           | 1.241           | 0.000           | 0.039           | 0.000           | 0.000           | 9.863           |
| 1.006           | 0.000           | 1.060           | 0.000           | 0.000           | 0.000           | 2.403           | 560.527         | 0.197           | 0.847           | 0.000           | 0.155           | 0.000           | 0.000           | 9.437           |
| 0.379           | 0.000           | 0.148           | 0.000           | 0.000           | 0.000           | 2.834           | 745.958         | 0.029           | 1.454           | 0.000           | 0.088           | 0.000           | 0.000           | 11.078          |
| 1.258           | 0.000           | 2.223           | 0.000           | 0.000           | 0.000           | 2.507           | 250.380         | 0.164           | 0.706           | 0.000           | 0.165           | 0.071           | 0.000           | 8.598           |
| 0.341           | 0.000           | 0.560           | 0.069           | 0.000</         |                 |                 |                 |                 |                 |                 |                 |                 |                 |                 |

| ENGG000012774 | ENGG0000068729 | ENGG0000142273 | ENGG0000015126 | ENGG0000100368 | ENGG00000280398 | ENGG0000263512 | ENGG0000274987 | ENGG0000170425 | ENGG0000222860 | ENGG0000069011 | ENGG0000278107 | ENGG0000173326 | ENGG00000271763 | ENGG0000125812 | ENGG0000221982 |
|---------------|----------------|----------------|----------------|----------------|-----------------|----------------|----------------|----------------|----------------|----------------|----------------|----------------|-----------------|----------------|----------------|
| 5375          | 3059           | 0.000          | 0.126          | 1.676          | 0.000           | 0.000          | 0.553          | 2.028          | 0.300          | 0.882          | 0.436          | 0.112          | 0.000           | 0.539          | 0.000          |
| 6731          | 4161           | 2.545          | 0.186          | 2.874          | 0.000           | 0.000          | 0.217          | 3.887          | 0.087          | 5.082          | 1.221          | 0.030          | 0.000           | 5.974          | 0.000          |
| 7648          | 3963           | 0.000          | 0.301          | 1.124          | 0.000           | 0.000          | 0.386          | 3.759          | 0.127          | 3.158          | 4.635          | 0.040          | 0.000           | 5.530          | 0.000          |
| 4277          | 3301           | 0.000          | 0.231          | 0.990          | 0.000           | 0.000          | 1.021          | 3.402          | 0.075          | 0.592          | 2.084          | 0.025          | 0.048           | 6.141          | 0.000          |
| 4816          | 3026           | 0.000          | 0.075          | 2.867          | 0.000           | 0.000          | 0.015          | 2.867          | 0.000          | 3.595          | 0.028          | 0.378          | 0.000           | 3.783          | 0.000          |
| 4778          | 5424           | 0.012          | 0.438          | 1.862          | 0.000           | 0.000          | 1.731          | 2.384          | 0.347          | 0.489          | 1.942          | 0.031          | 0.042           | 7.006          | 0.099          |
| 4096          | 5199           | 0.239          | 0.481          | 4.519          | 0.000           | 0.210          | 0.613          | 2.947          | 0.124          | 2.165          | 2.329          | 0.005          | 0.047           | 6.097          | 0.000          |
| 4044          | 2903           | 0.000          | 0.122          | 2.426          | 0.000           | 0.000          | 0.382          | 2.125          | 0.092          | 0.259          | 2.502          | 0.095          | 0.000           | 5.494          | 0.000          |
| 8278          | 3672           | 0.033          | 0.395          | 1.171          | 0.000           | 0.000          | 1.808          | 5.142          | 0.083          | 0.051          | 2.541          | 0.067          | 0.000           | 4.741          | 0.000          |
| 7171          | 3653           | 0.189          | 0.359          | 7.188          | 0.000           | 0.000          | 0.042          | 2.665          | 0.088          | 0.383          | 1.275          | 0.000          | 0.000           | 4.295          | 0.000          |
| 5363          | 3831           | 0.058          | 0.342          | 3.452          | 0.000           | 1.073          | 1.396          | 0.061          | 0.204          | 0.309          | 0.063          | 0.041          | 0.000           | 4.845          | 0.000          |
| 5338          | 3568           | 0.012          | 0.256          | 3.603          | 0.000           | 0.190          | 0.588          | 9.774          | 0.270          | 2.349          | 1.589          | 0.027          | 0.000           | 7.399          | 0.050          |
| 6604          | 3539           | 0.012          | 0.247          | 1.261          | 0.000           | 0.000          | 1.146          | 4.343          | 0.110          | 1.100          | 2.242          | 0.023          | 0.000           | 7.000          | 0.052          |
| 4794          | 3637           | 0.023          | 0.215          | 1.992          | 0.000           | 0.000          | 0.599          | 5.679          | 0.309          | 5.568          | 2.222          | 0.070          | 0.041           | 7.859          | 0.000          |
| 8289          | 2733           | 0.000          | 0.102          | 1.226          | 0.000           | 0.000          | 0.421          | 2.627          | 0.024          | 1.071          | 3.088          | 0.039          | 0.000           | 5.430          | 0.000          |
| 4130          | 3220           | 0.058          | 0.147          | 15.982         | 0.000           | 0.000          | 0.536          | 2.209          | 0.179          | 0.362          | 1.880          | 0.059          | 0.000           | 7.191          | 0.048          |
| 4537          | 4594           | 0.014          | 0.278          | 0.771          | 0.000           | 0.000          | 0.436          | 3.761          | 0.181          | 0.374          | 1.425          | 0.073          | 0.000           | 4.543          | 0.000          |
| 11079         | 3444           | 0.000          | 0.295          | 0.437          | 0.000           | 0.000          | 0.475          | 2.315          | 0.059          | 1.911          | 1.072          | 0.030          | 0.000           | 3.216          | 0.000          |
| 6341          | 4025           | 0.073          | 0.167          | 2.237          | 0.000           | 0.000          | 1.314          | 1.117          | 0.220          | 0.485          | 2.415          | 0.114          | 0.043           | 4.701          | 0.000          |
| 4918          | 3827           | 0.039          | 0.138          | 1.124          | 0.000           | 0.000          | 0.808          | 1.851          | 0.242          | 0.501          | 2.233          | 0.005          | 0.000           | 6.755          | 0.000          |
| 11195         | 3850           | 0.014          | 0.182          | 0.427          | 0.000           | 0.000          | 0.337          | 4.673          | 0.084          | 1.037          | 1.116          | 0.047          | 0.000           | 4.109          | 0.000          |
| 4858          | 3960           | 0.029          | 0.280          | 0.948          | 0.000           | 0.000          | 0.542          | 2.906          | 0.233          | 1.912          | 1.845          | 0.128          | 0.101           | 6.730          | 0.000          |
| 8441          | 5441           | 0.000          | 0.190          | 1.087          | 0.000           | 0.000          | 0.454          | 1.363          | 0.091          | 1.060          | 3.719          | 0.042          | 0.000           | 4.227          | 0.291          |
| 4919          | 4364           | 0.012          | 0.342          | 1.783          | 0.000           | 0.000          | 0.161          | 2.775          | 0.155          | 8.945          | 1.374          | 0.018          | 0.000           | 4.570          | 0.000          |
| 5667          | 4422           | 0.028          | 0.249          | 3.682          | 0.000           | 0.000          | 0.287          | 4.013          | 0.092          | 1.217          | 1.993          | 0.213          | 0.000           | 6.301          | 0.055          |
| 6484          | 3747           | 0.000          | 0.361          | 2.320          | 0.000           | 0.000          | 1.006          | 2.193          | 0.327          | 0.945          | 2.072          | 0.088          | 0.049           | 7.001          | 0.000          |
| 5070          | 1627           | 0.031          | 0.245          | 2.967          | 0.000           | 0.000          | 1.138          | 1.278          | 0.203          | 3.010          | 2.050          | 0.035          | 0.000           | 5.836          | 0.000          |
| 9467          | 3465           | 0.055          | 0.382          | 0.781          | 0.000           | 0.000          | 0.382          | 4.908          | 0.088          | 0.197          | 4.568          | 0.072          | 0.000           | 3.985          | 0.000          |
| 7410          | 2740           | 0.041          | 0.406          | 0.989          | 0.000           | 0.000          | 1.071          | 1.888          | 0.064          | 1.758          | 4.220          | 0.061          | 0.098           | 6.550          | 0.000          |
| 7199          | 3526           | 0.014          | 0.553          | 0.631          | 0.000           | 0.000          | 0.557          | 1.873          | 0.070          | 3.030          | 0.591          | 0.010          | 0.000           | 4.671          | 0.000          |
| 13324         | 3078           | 0.045          | 0.229          | 0.719          | 0.000           | 0.000          | 0.811          | 4.233          | 0.142          | 0.274          | 2.671          | 0.059          | 0.000           | 5.817          | 0.000          |
| 8193          | 3534           | 0.035          | 0.181          | 0.615          | 0.000           | 0.000          | 1.121          | 0.877          | 0.231          | 0.228          | 2.545          | 0.027          | 0.000           | 7.551          | 0.000          |
| 2969          | 4594           | 0.014          | 0.378          | 0.969          | 0.000           | 0.000          | 0.871          | 2.253          | 0.077          | 0.210          | 2.524          | 0.198          | 0.031           | 4.203          | 0.000          |
| 7557          | 3169           | 0.053          | 0.386          | 1.559          | 0.000           | 0.000          | 1.113          | 2.163          | 0.105          | 0.155          | 3.781          | 0.025          | 0.047           | 4.557          | 0.000          |
| 3559          | 5015           | 0.000          | 0.140          | 1.316          | 0.000           | 0.000          | 0.834          | 2.561          | 0.261          | 0.228          | 3.390          | 0.031          | 0.000           | 5.988          | 0.000          |
| 5227          | 4238           | 0.000          | 0.396          | 2.688          | 0.000           | 0.000          | 0.928          | 2.399          | 0.213          | 0.120          | 4.027          | 0.057          | 0.000           | 8.254          | 0.000          |
| 6259          | 4773           | 0.012          | 0.652          | 1.795          | 0.000           | 0.000          | 0.361          | 0.846          | 0.728          | 0.740          | 2.216          | 0.100          | 0.043           | 15.086         | 0.000          |
| 5134          | 4340           | 0.000          | 0.149          | 3.956          | 0.000           | 0.191          | 1.114          | 1.540          | 0.265          | 1.222          | 1.920          | 0.027          | 0.000           | 7.500          | 0.000          |
| 7131          | 5141           | 0.000          | 0.220          | 4.078          | 0.000           | 0.000          | 0.428          | 3.869          | 0.198          | 0.207          | 2.798          | 0.088          | 0.041           | 6.708          | 0.000          |
| 4097          | 4709           | 0.000          | 0.427          | 1.607          | 0.000           | 0.000          | 1.010          | 4.009          | 0.229          | 1.587          | 0.762          | 0.028          | 0.053           | 6.692          | 0.000          |
| 3589          | 3546           | 0.044          | 0.167          | 1.923          | 0.000           | 0.000          | 4.100          | 0.954          | 0.256          | 0.147          | 1.677          | 0.072          | 0.000           | 6.774          | 0.000          |
| 5090          | 4154           | 0.188          | 0.333          | 1.447          | 0.000           | 0.000          | 0.713          | 4.821          | 0.316          | 3.502          | 2.092          | 0.146          | 0.089           | 7.017          | 0.000          |
| 5800          | 4235           | 0.000          | 0.324          | 0.918          | 0.000           | 0.000          | 0.598          | 3.514          | 0.257          | 0.384          | 1.893          | 0.036          | 0.000           | 7.415          | 0.000          |
| 4412          | 4330           | 0.000          | 0.309          | 1.203          | 0.000           | 0.000          | 0.578          | 2.752          | 0.297          | 0.955          | 2.071          | 0.013          | 0.000           | 4.695          | 0.000          |
| 5072          | 5627           | 0.000          | 0.199          | 1.317          | 0.000           | 0.000          | 2.452          | 2.535          | 0.523          | 2.454          | 1.250          | 0.028          | 0.045           | 9.652          | 0.000          |
| 4215          | 4642           | 0.012          | 0.394          | 3.191          | 0.000           | 0.000          | 0.667          | 1.917          | 0.470          | 0.287          | 2.053          | 0.032          | 0.087           | 7.538          | 0.000          |
| 3613          | 3313           | 0.014          | 0.175          | 0.171          | 0.000           | 0.214          | 0.404          | 0.880          | 0.120          | 0.067          | 1.678          | 0.010          | 0.144           | 5.978          | 0.000          |
| 6328          | 3821           | 0.000          | 0.356          | 2.046          | 0.000           | 0.000          | 0.520          | 4.231          | 0.243          | 0.080          | 2.694          | 0.056          | 0.048           | 6.073          | 0.000          |
| 7097          | 5147           | 0.024          | 0.294          | 0.716          | 0.000           | 0.000          | 0.844          | 2.161          | 0.144          | 9.225          | 2.144          | 0.192          | 0.000           | 5.836          | 0.000          |
| 7231          | 3544           | 0.034          | 0.225          | 6.806          | 0.000           | 0.000          | 0.517          | 4.369          | 0.073          | 1.473          | 1.481          | 0.029          | 0.000           | 4.848          | 0.000          |
| 6299          | 4289           | 0.011          | 0.255          | 1.293          | 0.000           | 0.000          | 0.673          | 4.552          | 0.063          | 0.695          | 1.793          | 0.211          | 0.000           | 4.991          | 0.000          |
| 4806          | 4695           | 0.200          | 0.208          | 2.260          | 0.000           | 0.000          | 0.823          | 2.387          | 0.300          | 1.451          | 2.091          | 0.059          | 0.000           | 4.865          | 0.000          |
| 6035          | 6578           | 0.037          | 0.383          | 2.550          | 0.000           | 0.000          | 0.670          | 2.278          | 0.190          | 2.294          | 1.198          | 0.028          | 0.000           | 5.629          | 0.000          |
| 8625          | 4435           | 0.044          | 0.204          | 1.423          | 0.000           | 0.000          | 0.622          | 4.188          | 0.270          | 4.040          | 1.294          | 0.008          | 0.039           | 7.095          | 0.000          |
| 7080          | 4594           | 0.000          | 0.369          | 1.203          | 0.000           | 0.000          | 0.578          | 10.022         | 0.162          | 0.710          | 1.113          | 0.020          | 0.000           | 4.655          | 0.000          |
| 2580          | 8249           | 0.000          | 0.422          | 0.347          | 0.000           | 0.000          | 0.852          | 1.815          | 0.098          | 0.918          | 1.129          | 0.059          | 0.000           | 9.231          | 0.000          |
| 6974          | 5109           | 0.026          | 0.176          | 1.438          | 0.000           | 0.000          | 0.318          | 2.134          | 0.140          | 1.100          | 1.999          | 0.122          | 0.000           | 5.476          | 0.000          |
| 6236          | 7121           | 0.025          | 0.280          | 1.029          | 0.000           | 0.000          | 1.501          | 2.709          | 0.178          | 1.040          | 1.524          | 0.028          | 0.000           | 6.624          | 0.000          |
| 4540          | 4702           | 0.024          | 0.325          | 1.563          | 0.000           | 0.193          | 0.464          | 4.704          | 0.239          | 0.253          | 3.424          | 0.018          | 0.000           | 7.824          | 0.000          |
| 6693          | 4622           | 0.057          | 0.187          | 1.231          | 0.000           | 0.180          | 0.588          | 0.120          | 0.149          | 3.614          | 1.290          | 0.034          | 0.000           | 7.182          | 0.000          |
| 5171          | 4213           | 0.000          | 0.427          | 1.230          | 0.000           | 0.000          | 0.704          | 3.488          | 0.195          | 0.207          | 2.798          | 0.081          | 0.000           | 4.658          | 0.000          |
| 12102         | 4445           | 0.000          | 0.359          | 0.469          | 0.000           | 0.000          | 0.454          | 3.428          | 0.039          | 0.667          | 2.084          | 0.008          | 0.000           | 3.981          | 0.000          |
| 5965          | 4441           | 0.011          | 0.737          | 0.454          | 0.000           | 0.000          | 0.886          | 2.532          | 0.203          | 2.784          | 1.964          | 0.147          | 0.000           | 6.145          | 0.000          |
| 3857          | 3610           | 0.117          | 0.385          | 3.136          | 0.000           | 0.553          | 0.760          | 1.611          | 0.321          | 0.499          | 3.678          | 0.166          | 0.000           | 6.418          | 0.000          |
| 7904          | 5934           | 0.013          | 0.117          | 0.394          | 0.000           | 0.000          | 0.670          | 1.666          | 0.212          | 0.076          | 4.135          | 0.020          | 0.000           | 9.063          | 0.000          |
| 3071          | 4000           | 0.000          | 0.309          | 0.596          | 0.000           | 0.000          | 0.616          | 3.026          | 0.066          | 0.276          | 1.893          | 0.013          | 0.000           | 6.355          | 0.000          |
| 9055          | 3341           | 0.000          | 0.223          | 0.815          | 0.000           | 0.000          | 0.435          | 2.512          | 0.107          | 6.184          | 1.791          | 0.017          | 0.000           | 4.584          | 0.000          |
| 11263         | 3731           | 0.031          | 0.042          | 0.265          | 0.000           | 0.000          | 0.415          | 3.821          | 0.057          | 5.703          | 1.070          | 0.046          | 0.000           | 4.685          | 0.000          |
| 8550          | 3838           | 0.000          | 0.130          | 0.731          | 0.000           | 0.000          | 0.551          | 0.654          | 0.085          | 0.110          | 2.408          | 0.010          | 0.000           | 6.382          | 0.000          |
| 17165         | 4626           | 0.000          | 0.095          | 0.790          | 0.000           | 0.000          | 0.218          | 1.952          | 0.112          | 5.513          | 0.994          | 0.012          | 0.000           | 4.999          | 0.000          |
| 8669          | 5353           | 0.012          | 0.211          | 0.547          | 0.000           | 0.165          | 0.381          | 1.745          | 0.131          | 2.609          | 2.615          | 0.039          | 0.000           | 4.337          | 0.000          |
| 7080          | 2800           | 0.000          | 0.653          | 0.324          | 0.000           | 0.000          | 0.101          | 0.288          | 0.121          | 3.823          | 1.847          | 0.098          | 0.000           | 4.162          | 0.000          |
| 5104          | 2805           | 0.129          | 0.155          | 1.367          | 0.000           | 0.000          | 0.552          | 5.598          | 0.140          | 0.371          | 2.685          | 0.028          | 0.000           | 4.042          | 0.000          |
| 8498          | 4224           | 0.000          | 0.273          | 0.754          | 0.000           | 0.333          | 1.318          | 2.431          | 0.069          | 5.508          | 5.406          | 0.079          | 0.0             |                |                |

| ENSG00000273674 | ENSG0000026620 | ENSG00000265665 | ENSG00000199335 | ENSG00000265995 | ENSG00000109911 | ENSG00000238457 | ENSG00000229332 | ENSG00000165670 | ENSG00000232501 | ENSG00000205636 | ENSG00000199075 | ENSG00000136111 | ENSG00000153707 | ENSG00000251501 | ENSG00000101000 |
|-----------------|----------------|-----------------|-----------------|-----------------|-----------------|-----------------|-----------------|-----------------|-----------------|-----------------|-----------------|-----------------|-----------------|-----------------|-----------------|
| 0.074           | 0.000          | 0.000           | 0.000           | 0.000           | 5.209           | 0.000           | 0.044           | 1.249           | 0.000           | 0.000           | 0.000           | 2.350           | 6.095           | 0.000           | 5.343           |
| 0.047           | 0.000          | 0.000           | 0.000           | 0.000           | 5.500           | 0.000           | 0.000           | 0.723           | 0.000           | 0.000           | 0.000           | 2.484           | 2.370           | 0.000           | 31.688          |
| 0.077           | 0.064          | 0.000           | 0.000           | 0.000           | 7.284           | 0.000           | 0.033           | 1.936           | 0.000           | 0.000           | 0.000           | 2.447           | 4.200           | 0.000           | 4.849           |
| 0.127           | 0.000          | 0.000           | 0.198           | 0.000           | 13.568          | 0.000           | 0.038           | 1.806           | 0.000           | 0.000           | 0.000           | 4.146           | 9.163           | 0.000           | 4.974           |
| 0.027           | 0.000          | 0.000           | 0.000           | 0.000           | 9.506           | 0.000           | 0.000           | 1.426           | 0.000           | 0.000           | 0.000           | 2.031           | 1.261           | 0.000           | 15.845          |
| 0.058           | 0.064          | 0.296           | 0.174           | 0.000           | 6.809           | 0.000           | 0.000           | 2.384           | 0.000           | 0.000           | 0.000           | 5.023           | 8.065           | 0.000           | 3.265           |
| 0.047           | 0.072          | 0.000           | 0.000           | 0.000           | 6.691           | 0.000           | 0.000           | 1.744           | 0.000           | 0.000           | 0.000           | 5.309           | 2.746           | 0.000           | 22.061          |
| 0.166           | 0.000          | 0.353           | 0.000           | 0.000           | 8.149           | 0.000           | 0.000           | 1.374           | 0.000           | 0.000           | 0.000           | 4.194           | 7.379           | 0.000           | 10.597          |
| 0.308           | 0.087          | 0.000           | 0.240           | 0.000           | 9.428           | 0.000           | 0.000           | 1.687           | 0.000           | 0.000           | 0.000           | 3.474           | 6.436           | 0.015           | 13.635          |
| 0.084           | 0.127          | 0.000           | 0.000           | 0.000           | 6.364           | 0.000           | 0.000           | 1.562           | 0.000           | 0.000           | 0.000           | 4.972           | 1.698           | 0.000           | 17.738          |
| 0.069           | 0.000          | 0.000           | 0.343           | 0.000           | 7.045           | 0.000           | 0.000           | 1.468           | 0.000           | 0.000           | 0.000           | 3.463           | 2.545           | 0.000           | 21.124          |
| 0.057           | 0.000          | 0.000           | 0.355           | 0.000           | 10.131          | 0.000           | 0.000           | 1.952           | 0.000           | 0.000           | 0.000           | 2.811           | 7.956           | 0.000           | 8.755           |
| 0.044           | 0.033          | 0.000           | 0.000           | 0.000           | 12.867          | 0.000           | 0.279           | 1.968           | 0.000           | 0.000           | 0.000           | 4.103           | 5.864           | 0.011           | 9.339           |
| 0.172           | 0.000          | 0.000           | 0.000           | 0.000           | 11.909          | 0.000           | 0.065           | 1.917           | 0.000           | 0.000           | 0.000           | 3.322           | 6.522           | 0.010           | 5.782           |
| 0.000           | 0.000          | 0.000           | 0.000           | 0.000           | 9.355           | 0.000           | 0.000           | 2.075           | 0.000           | 0.000           | 0.000           | 2.860           | 3.004           | 0.000           | 16.612          |
| 0.048           | 0.031          | 0.000           | 0.172           | 0.000           | 5.973           | 0.000           | 0.043           | 1.853           | 0.000           | 0.000           | 0.000           | 6.135           | 4.044           | 0.000           | 9.002           |
| 0.087           | 0.000          | 0.000           | 0.458           | 0.000           | 10.618          | 0.000           | 0.044           | 1.921           | 0.000           | 0.000           | 0.000           | 2.362           | 8.671           | 0.000           | 4.652           |
| 0.339           | 0.000          | 0.000           | 0.000           | 0.000           | 11.948          | 0.000           | 0.089           | 2.244           | 0.000           | 0.000           | 0.000           | 1.431           | 1.251           | 0.000           | 19.277          |
| 0.129           | 0.033          | 0.000           | 0.715           | 0.000           | 7.610           | 0.000           | 0.102           | 1.428           | 0.000           | 0.000           | 0.248           | 3.981           | 2.448           | 0.000           | 10.668          |
| 0.031           | 0.035          | 0.000           | 0.000           | 0.000           | 9.572           | 0.000           | 0.000           | 1.991           | 0.000           | 0.000           | 0.000           | 2.932           | 1.303           | 0.000           | 6.248           |
| 0.278           | 0.000          | 0.000           | 0.204           | 0.000           | 13.770          | 0.000           | 0.000           | 2.155           | 0.000           | 0.000           | 0.000           | 1.205           | 4.375           | 0.012           | 16.346          |
| 0.059           | 0.077          | 0.000           | 0.000           | 0.000           | 6.072           | 0.000           | 0.000           | 2.355           | 0.000           | 0.000           | 0.585           | 3.976           | 11.370          | 0.013           | 2.440           |
| 0.082           | 0.000          | 0.000           | 0.000           | 0.000           | 8.184           | 0.361           | 0.039           | 1.282           | 0.000           | 0.000           | 0.000           | 2.338           | 3.787           | 0.012           | 10.892          |
| 0.035           | 0.000          | 0.000           | 0.000           | 0.000           | 7.317           | 0.000           | 0.067           | 1.169           | 0.000           | 0.000           | 0.243           | 1.977           | 3.123           | 0.000           | 22.618          |
| 0.078           | 0.038          | 0.000           | 0.000           | 0.000           | 7.771           | 0.000           | 0.000           | 1.644           | 0.000           | 0.000           | 0.000           | 3.263           | 1.852           | 0.000           | 11.322          |
| 0.041           | 0.000          | 0.000           | 0.405           | 0.000           | 7.552           | 0.000           | 0.000           | 1.884           | 0.000           | 0.000           | 0.282           | 3.155           | 4.903           | 0.000           | 8.605           |
| 0.073           | 0.042          | 0.000           | 0.458           | 0.000           | 9.498           | 0.000           | 0.044           | 1.966           | 0.000           | 0.000           | 0.000           | 3.344           | 1.666           | 0.000           | 14.970          |
| 0.065           | 0.000          | 0.000           | 0.000           | 0.000           | 7.847           | 0.000           | 0.000           | 1.959           | 0.000           | 0.000           | 0.000           | 2.607           | 2.807           | 0.024           | 7.719           |
| 0.242           | 0.000          | 0.000           | 0.000           | 0.000           | 11.880          | 0.000           | 0.038           | 2.453           | 0.000           | 0.000           | 0.279           | 3.656           | 2.233           | 0.000           | 9.347           |
| 0.251           | 0.000          | 0.000           | 0.202           | 0.000           | 10.116          | 0.000           | 0.038           | 2.086           | 0.000           | 0.000           | 0.000           | 2.267           | 1.811           | 0.000           | 9.385           |
| 0.193           | 0.030          | 0.000           | 0.000           | 0.000           | 12.185          | 0.000           | 0.000           | 1.886           | 0.000           | 0.000           | 0.000           | 1.980           | 3.002           | 0.000           | 11.877          |
| 0.217           | 0.000          | 0.000           | 0.000           | 0.000           | 8.275           | 0.000           | 0.000           | 2.155           | 0.000           | 0.000           | 0.000           | 1.316           | 1.791           | 0.000           | 4.162           |
| 0.187           | 0.000          | 0.000           | 0.199           | 0.000           | 10.658          | 0.000           | 0.039           | 2.297           | 0.000           | 0.000           | 0.000           | 2.394           | 5.809           | 0.000           | 4.920           |
| 0.078           | 0.038          | 0.000           | 0.977           | 0.000           | 7.159           | 0.000           | 0.037           | 1.861           | 0.000           | 0.000           | 0.000           | 1.325           | 1.966           | 0.000           | 13.584          |
| 0.066           | 0.000          | 0.000           | 0.000           | 0.000           | 9.948           | 0.000           | 0.000           | 2.360           | 0.000           | 0.000           | 0.000           | 2.427           | 3.797           | 0.000           | 8.024           |
| 0.045           | 0.000          | 0.000           | 0.748           | 0.000           | 13.040          | 0.000           | 0.000           | 1.941           | 0.000           | 0.000           | 0.000           | 3.820           | 3.525           | 0.034           | 11.022          |
| 0.200           | 0.033          | 0.000           | 0.714           | 0.000           | 8.452           | 0.000           | 0.204           | 2.704           | 0.000           | 0.000           | 0.496           | 4.240           | 23.419          | 0.000           | 3.060           |
| 0.093           | 0.065          | 0.000           | 0.178           | 0.000           | 10.943          | 0.000           | 0.068           | 2.125           | 0.000           | 0.000           | 0.000           | 5.939           | 4.321           | 0.000           | 4.632           |
| 0.102           | 0.000          | 0.000           | 0.000           | 0.000           | 9.824           | 0.000           | 0.000           | 2.229           | 0.000           | 0.000           | 0.000           | 4.423           | 10.485          | 0.028           | 10.961          |
| 0.106           | 0.040          | 0.373           | 0.000           | 0.000           | 11.654          | 0.000           | 0.000           | 2.233           | 0.000           | 0.000           | 0.000           | 3.312           | 6.701           | 0.000           | 4.151           |
| 0.105           | 0.000          | 0.000           | 0.000           | 0.000           | 9.846           | 0.000           | 0.000           | 1.523           | 0.000           | 0.000           | 0.000           | 3.808           | 3.971           | 0.000           | 8.972           |
| 0.015           | 0.000          | 0.000           | 0.185           | 0.000           | 9.631           | 0.000           | 0.000           | 1.612           | 0.000           | 0.000           | 0.257           | 2.186           | 1.708           | 0.000           | 19.903          |
| 0.073           | 0.074          | 0.345           | 0.000           | 0.000           | 13.138          | 0.000           | 0.000           | 1.501           | 0.000           | 0.000           | 0.000           | 3.670           | 2.758           | 0.000           | 10.313          |
| 0.077           | 0.000          | 0.296           | 0.175           | 0.000           | 13.439          | 0.000           | 0.033           | 2.058           | 0.000           | 0.000           | 0.000           | 4.561           | 6.150           | 0.000           | 6.574           |
| 0.253           | 0.102          | 0.000           | 0.558           | 0.000           | 13.908          | 0.000           | 0.035           | 2.294           | 0.000           | 0.000           | 0.258           | 5.102           | 2.275           | 0.000           | 9.167           |
| 0.182           | 0.000          | 0.000           | 0.000           | 0.000           | 12.200          | 0.000           | 0.000           | 2.950           | 0.000           | 0.000           | 0.000           | 3.279           | 2.490           | 0.000           | 8.393           |
| 0.048           | 0.109          | 0.000           | 0.000           | 0.000           | 2.841           | 0.000           | 0.000           | 1.577           | 0.000           | 0.000           | 0.000           | 7.781           | 14.677          | 0.000           | 18.993          |
| 0.113           | 0.037          | 0.000           | 0.000           | 0.000           | 6.823           | 0.000           | 0.038           | 1.776           | 0.000           | 0.000           | 0.000           | 4.057           | 7.805           | 0.000           | 7.288           |
| 0.021           | 0.032          | 0.000           | 0.000           | 0.000           | 10.616          | 0.000           | 0.000           | 2.330           | 0.000           | 0.000           | 0.000           | 2.113           | 2.583           | 0.000           | 6.205           |
| 0.040           | 0.000          | 0.000           | 0.000           | 0.000           | 8.523           | 0.000           | 0.000           | 1.121           | 0.000           | 0.000           | 0.000           | 3.878           | 3.568           | 0.000           | 18.550          |
| 0.127           | 0.182          | 0.000           | 0.499           | 0.000           | 7.986           | 0.000           | 0.000           | 1.261           | 0.000           | 0.000           | 0.000           | 3.023           | 5.457           | 0.000           | 7.914           |
| 0.057           | 0.033          | 0.000           | 0.000           | 0.000           | 9.458           | 0.000           | 0.034           | 0.898           | 0.000           | 0.000           | 0.000           | 4.369           | 1.753           | 0.000           | 28.923          |
| 0.080           | 0.033          | 0.619           | 0.000           | 0.000           | 14.833          | 0.000           | 0.069           | 1.479           | 0.000           | 0.000           | 0.000           | 2.873           | 4.661           | 0.000           | 12.802          |
| 0.052           | 0.000          | 0.000           | 0.161           | 0.000           | 11.798          | 0.000           | 0.061           | 2.394           | 0.000           | 0.000           | 0.000           | 2.298           | 0.903           | 0.000           | 8.629           |
| 0.195           | 0.000          | 0.000           | 0.000           | 0.000           | 10.258          | 0.000           | 0.113           | 2.419           | 0.000           | 0.000           | 0.000           | 5.163           | 5.508           | 0.000           | 4.600           |
| 0.217           | 0.000          | 0.000           | 0.000           | 0.000           | 9.761           | 0.000           | 0.000           | 1.901           | 0.000           | 0.000           | 0.000           | 2.309           | 4.102           | 0.047           | 3.866           |
| 0.131           | 0.000          | 0.000           | 0.192           | 0.000           | 10.732          | 0.000           | 0.000           | 2.228           | 0.000           | 0.000           | 0.000           | 1.987           | 2.238           | 0.000           | 6.707           |
| 0.131           | 0.099          | 0.308           | 0.181           | 0.000           | 9.922           | 0.000           | 0.035           | 1.119           | 0.000           | 0.000           | 0.000           | 3.429           | 2.025           | 0.000           | 7.345           |
| 0.036           | 0.000          | 0.306           | 0.000           | 0.000           | 10.258          | 0.000           | 0.034           | 1.377           | 0.000           | 0.000           | 0.000           | 4.575           | 4.571           | 0.000           | 6.325           |
| 0.094           | 0.000          | 0.000           | 0.338           | 0.000           | 14.623          | 0.000           | 0.160           | 1.822           | 0.000           | 0.000           | 0.000           | 2.825           | 2.793           | 0.000           | 18.424          |
| 0.101           | 0.000          | 0.000           | 0.291           | 0.000           | 9.342           | 0.000           | 0.000           | 2.222           | 0.000           | 0.000           | 0.000           | 3.272           | 4.407           | 0.000           | 5.138           |
| 0.148           | 0.000          | 0.000           | 0.617           | 0.000           | 15.676          | 0.000           | 0.117           | 1.291           | 0.000           | 0.000           | 0.000           | 2.077           | 1.524           | 0.000           | 4.407           |
| 0.058           | 0.000          | 0.000           | 0.000           | 0.000           | 10.608          | 0.000           | 0.000           | 1.837           | 0.000           | 0.000           | 0.000           | 2.163           | 10.453          | 0.000           | 2.957           |
| 0.055           | 0.000          | 0.877           | 0.000           | 0.000           | 6.269           | 0.000           | 0.033           | 1.156           | 0.000           | 0.000           | 0.000           | 2.175           | 1.266           | 0.000           | 14.897          |
| 0.077           | 0.000          | 1.956           | 0.000           | 0.000           | 14.288          | 0.000           | 0.256           | 2.055           | 0.000           | 0.053           | 0.000           | 1.844           | 6.693           | 0.000           | 8.089           |
| 0.079           | 0.000          | 0.296           | 0.175           | 0.000           | 6.619           | 0.000           | 0.066           | 1.767           | 0.000           | 0.000           | 0.000           | 2.148           | 6.262           | 0.000           | 4.834           |
| 0.163           | 0.000          | 0.000           | 0.000           | 0.000           | 10.753          | 0.000           | 0.000           | 1.891           | 0.000           | 0.000           | 0.000           | 2.457           | 5.275           | 0.020           | 7.677           |
| 0.136           | 0.000          | 0.000           | 0.225           | 0.000           | 15.667          | 0.000           | 0.000           | 2.241           | 0.000           | 0.000           | 0.000           | 1.058           | 0.900           | 0.014           | 6.121           |
| 0.048           | 0.000          | 0.000           | 0.000           | 0.000           | 10.306          | 0.000           | 0.000           | 1.954           | 0.000           | 0.000           | 0.000           | 3.252           | 1.501           | 0.000           | 5.235           |
| 0.123           | 0.043          | 0.000           | 0.000           | 0.000           | 14.215          | 0.000           | 0.000           | 1.286           | 0.000           | 0.000           | 0.000           | 2.675           | 0.897           | 0.000           | 11.521          |
| 0.028           | 0.000          | 0.000           | 0.173           | 0.000           | 13.198          | 0.000           | 0.000           | 1.423           | 0.000           | 0.000           | 0.000           | 1.373           | 5.168           | 0.000           | 6.137           |
| 0.040           | 0.000          | 0.000           | 0.000           | 0.000           | 10.210          | 0.000           | 0.000           | 1.427           | 0.000           | 0.000           | 0.000           | 2.689           | 2.092           | 0.000           | 27.022          |
| 0.038           | 0.000          | 0.000           | 0.000           | 0.000           | 8.616           | 0.000           | 0.241           |                 |                 |                 |                 |                 |                 |                 |                 |

| ENSG0000028615 | ENSG00000281479 | ENSG00000222301 | ENSG00000289088 | ENSG00000261476 | ENSG00000260037 | ENSG00000227312 | ENSG00000274449 | ENSG00000226403 | ENSG00000261291 | ENSG00000245967 | ENSG00000229809 | ENSG00000214244 | ENSG00000276230 | ENSG00000270317 | ENSG00000297822 |
|----------------|-----------------|-----------------|-----------------|-----------------|-----------------|-----------------|-----------------|-----------------|-----------------|-----------------|-----------------|-----------------|-----------------|-----------------|-----------------|
| 0.024          | 0.000           | 0.000           | 0.718           | 0.058           | 0.121           | 0.000           | 0.365           | 4.785           | 0.000           | 2.819           | 3.717           | 0.139           | 0.000           | 0.000           | 0.030           |
| 0.000          | 0.000           | 0.000           | 0.235           | 0.025           | 0.000           | 0.000           | 0.171           | 0.140           | 0.000           | 3.435           | 3.928           | 0.094           | 0.010           | 0.000           | 0.050           |
| 0.000          | 0.000           | 0.000           | 0.962           | 0.000           | 0.061           | 0.000           | 0.547           | 1.540           | 0.037           | 3.389           | 5.967           | 0.315           | 0.053           | 0.000           | 0.022           |
| 0.000          | 0.079           | 0.000           | 0.284           | 0.025           | 0.000           | 0.000           | 1.277           | 1.179           | 0.042           | 1.890           | 5.334           | 0.095           | 0.020           | 0.000           | 0.025           |
| 0.011          | 0.069           | 0.000           | 0.366           | 0.000           | 0.000           | 0.000           | 0.367           | 0.367           | 0.000           | 0.367           | 0.367           | 0.132           | 0.034           | 0.000           | 0.113           |
| 0.000          | 0.035           | 0.049           | 1.374           | 0.263           | 0.030           | 0.000           | 1.139           | 0.870           | 0.110           | 3.244           | 5.621           | 0.146           | 0.188           | 0.075           | 0.111           |
| 0.020          | 0.000           | 0.000           | 0.938           | 0.123           | 0.000           | 0.000           | 0.246           | 0.047           | 0.124           | 4.202           | 4.606           | 0.141           | 0.060           | 0.000           | 0.201           |
| 0.000          | 0.000           | 0.000           | 0.843           | 0.026           | 0.000           | 0.000           | 0.227           | 2.518           | 0.087           | 2.709           | 4.953           | 0.050           | 0.021           | 0.000           | 0.000           |
| 0.012          | 0.048           | 0.000           | 0.688           | 0.030           | 0.126           | 0.000           | 0.873           | 3.252           | 0.000           | 2.172           | 5.435           | 0.029           | 0.024           | 0.000           | 0.061           |
| 0.000          | 0.000           | 0.000           | 0.334           | 0.000           | 0.000           | 0.000           | 0.135           | 0.996           | 0.000           | 4.125           | 6.995           | 0.335           | 0.035           | 0.000           | 0.179           |
| 0.000          | 0.000           | 0.000           | 0.369           | 0.000           | 0.030           | 0.000           | 0.304           | 1.958           | 0.072           | 3.215           | 5.866           | 0.062           | 0.017           | 0.000           | 0.023           |
| 0.009          | 0.036           | 0.000           | 0.848           | 0.156           | 0.031           | 0.000           | 0.686           | 1.858           | 0.037           | 3.988           | 4.539           | 0.149           | 0.036           | 0.076           | 0.136           |
| 0.028          | 0.000           | 0.000           | 0.875           | 0.023           | 0.000           | 0.056           | 0.879           | 0.261           | 0.077           | 1.951           | 4.268           | 0.044           | 0.000           | 0.000           | 0.047           |
| 0.027          | 0.171           | 0.000           | 0.327           | 0.151           | 0.060           | 0.000           | 1.159           | 0.489           | 0.036           | 4.493           | 5.672           | 0.144           | 0.061           | 0.000           | 0.110           |
| 0.000          | 0.000           | 0.000           | 0.182           | 0.000           | 0.000           | 0.235           | 0.344           | 0.363           | 0.000           | 1.861           | 4.677           | 0.366           | 0.039           | 0.000           | 0.195           |
| 0.018          | 0.034           | 0.024           | 0.901           | 0.043           | 0.000           | 0.000           | 0.171           | 0.204           | 0.072           | 4.788           | 4.063           | 0.041           | 0.026           | 0.000           | 0.076           |
| 0.000          | 0.000           | 0.028           | 0.786           | 0.025           | 0.069           | 0.000           | 0.986           | 1.600           | 0.083           | 2.234           | 3.957           | 0.077           | 0.040           | 0.000           | 0.052           |
| 0.000          | 0.000           | 0.000           | 0.280           | 0.000           | 0.041           | 0.000           | 0.567           | 2.346           | 0.000           | 1.491           | 10.599          | 0.000           | 0.024           | 0.101           | 0.090           |
| 0.000          | 0.036           | 0.025           | 0.726           | 0.045           | 0.031           | 0.110           | 0.270           | 4.207           | 0.037           | 2.998           | 4.941           | 0.064           | 0.000           | 0.000           | 0.114           |
| 0.010          | 0.000           | 0.000           | 0.319           | 0.048           | 0.000           | 0.000           | 0.689           | 0.273           | 0.080           | 3.467           | 3.611           | 0.000           | 0.000           | 0.000           | 0.098           |
| 0.000          | 0.000           | 0.029           | 0.486           | 0.000           | 0.000           | 0.063           | 0.302           | 4.988           | 0.000           | 1.669           | 8.161           | 0.122           | 0.010           | 0.000           | 0.078           |
| 0.000          | 0.000           | 0.000           | 0.704           | 0.053           | 0.037           | 0.000           | 1.119           | 0.701           | 0.044           | 2.452           | 3.995           | 0.177           | 0.053           | 0.000           | 0.054           |
| 0.000          | 0.000           | 0.000           | 0.558           | 0.103           | 0.000           | 0.000           | 0.629           | 1.565           | 0.173           | 2.061           | 6.139           | 0.123           | 0.010           | 0.000           | 0.237           |
| 0.000          | 0.000           | 0.000           | 0.209           | 0.000           | 0.000           | 0.000           | 0.158           | 0.666           | 0.037           | 4.790           | 3.909           | 0.063           | 0.000           | 0.000           | 0.045           |
| 0.000          | 0.000           | 0.000           | 0.419           | 0.000           | 0.034           | 0.000           | 0.276           | 1.688           | 0.000           | 4.347           | 4.125           | 0.070           | 0.049           | 0.000           | 0.000           |
| 0.021          | 0.000           | 0.029           | 0.678           | 0.076           | 0.035           | 0.000           | 0.548           | 1.686           | 0.043           | 4.077           | 5.867           | 0.073           | 0.021           | 0.000           | 0.052           |
| 0.000          | 0.000           | 0.000           | 1.532           | 0.049           | 0.000           | 0.000           | 0.325           | 1.907           | 0.048           | 2.455           | 7.115           | 0.275           | 0.048           | 0.000           | 0.029           |
| 0.000          | 0.000           | 0.023           | 0.830           | 0.021           | 0.000           | 0.000           | 1.919           | 0.124           | 0.000           | 4.473           | 6.670           | 0.242           | 0.030           | 0.000           | 0.025           |
| 0.021          | 0.040           | 0.000           | 0.720           | 0.050           | 0.070           | 0.124           | 1.598           | 1.338           | 0.042           | 3.122           | 8.720           | 0.072           | 0.051           | 0.000           | 0.180           |
| 0.000          | 0.000           | 0.000           | 0.434           | 0.076           | 0.000           | 0.000           | 1.321           | 0.288           | 0.000           | 2.275           | 9.436           | 0.073           | 0.010           | 0.000           | 0.233           |
| 0.009          | 0.000           | 0.000           | 0.953           | 0.000           | 0.029           | 0.000           | 0.262           | 8.818           | 0.070           | 3.894           | 9.509           | 0.020           | 0.000           | 0.000           | 0.021           |
| 0.018          | 0.000           | 0.000           | 0.957           | 0.066           | 0.030           | 0.054           | 1.111           | 1.491           | 0.073           | 2.380           | 5.920           | 0.042           | 0.018           | 0.075           | 0.111           |
| 0.000          | 0.000           | 0.076           | 0.076           | 0.000           | 0.000           | 0.000           | 0.885           | 8.826           | 0.000           | 2.398           | 6.056           | 0.024           | 0.010           | 0.000           | 0.152           |
| 0.000          | 0.000           | 0.000           | 0.607           | 0.000           | 0.102           | 0.060           | 0.528           | 1.068           | 0.041           | 2.245           | 8.249           | 0.094           | 0.040           | 0.000           | 0.075           |
| 0.000          | 0.000           | 0.000           | 0.394           | 0.000           | 0.072           | 0.000           | 0.412           | 0.988           | 0.000           | 2.723           | 4.629           | 0.099           | 0.042           | 0.000           | 0.000           |
| 0.000          | 0.075           | 0.053           | 0.714           | 0.047           | 0.000           | 0.000           | 0.325           | 0.667           | 0.000           | 3.027           | 4.763           | 0.112           | 0.000           | 0.000           | 0.048           |
| 0.018          | 0.036           | 0.051           | 4.604           | 0.291           | 0.000           | 0.000           | 0.512           | 0.382           | 0.000           | 2.556           | 7.828           | 0.043           | 0.045           | 0.000           | 0.160           |
| 0.000          | 0.000           | 0.000           | 1.022           | 0.045           | 0.000           | 0.110           | 0.689           | 0.848           | 0.000           | 4.444           | 4.877           | 0.086           | 0.072           | 0.000           | 0.046           |
| 0.000          | 0.000           | 0.000           | 2.235           | 0.134           | 0.037           | 0.000           | 0.425           | 3.315           | 0.045           | 2.440           | 5.977           | 0.173           | 0.039           | 0.000           | 0.027           |
| 0.046          | 0.178           | 0.031           | 0.892           | 0.110           | 0.384           | 0.000           | 0.778           | 2.873           | 0.092           | 3.466           | 4.705           | 0.079           | 0.011           | 0.000           | 0.197           |
| 0.000          | 0.000           | 0.000           | 0.574           | 0.082           | 0.000           | 0.000           | 0.324           | 8.317           | 0.046           | 3.937           | 4.991           | 0.079           | 0.033           | 0.000           | 0.224           |
| 0.019          | 0.000           | 0.000           | 0.618           | 0.046           | 0.032           | 0.114           | 0.327           | 1.010           | 0.078           | 3.268           | 4.244           | 0.089           | 0.019           | 0.000           | 0.165           |
| 0.032          | 0.041           | 0.029           | 0.437           | 0.077           | 0.000           | 0.000           | 0.681           | 0.822           | 0.000           | 2.767           | 4.980           | 0.073           | 0.021           | 0.000           | 0.026           |
| 0.036          | 0.000           | 0.000           | 1.167           | 0.066           | 0.000           | 0.000           | 0.566           | 2.116           | 0.000           | 2.596           | 3.966           | 0.042           | 0.016           | 0.000           | 0.067           |
| 0.058          | 0.000           | 0.000           | 0.533           | 0.187           | 0.032           | 0.114           | 1.317           | 3.759           | 0.000           | 2.534           | 4.943           | 0.089           | 0.066           | 0.000           | 0.214           |
| 0.019          | 0.036           | 0.000           | 2.123           | 0.091           | 0.032           | 0.000           | 0.228           | 0.906           | 0.076           | 4.359           | 6.863           | 0.109           | 0.009           | 0.000           | 0.116           |
| 0.021          | 0.040           | 0.028           | 0.716           | 0.201           | 0.000           | 0.000           | 0.064           | 0.760           | 0.042           | 2.383           | 4.928           | 0.216           | 0.020           | 0.000           | 0.102           |
| 0.021          | 0.000           | 0.029           | 0.676           | 0.051           | 0.000           | 0.000           | 0.618           | 2.740           | 0.000           | 2.850           | 7.233           | 0.097           | 0.092           | 0.000           | 0.155           |
| 0.000          | 0.000           | 0.000           | 0.754           | 0.044           | 0.000           | 0.054           | 0.310           | 0.417           | 0.000           | 2.634           | 6.322           | 0.063           | 0.008           | 0.000           | 0.066           |
| 0.000          | 0.043           | 0.000           | 1.235           | 0.134           | 0.037           | 0.000           | 0.425           | 1.998           | 0.141           | 4.852           | 6.975           | 0.099           | 0.026           | 0.000           | 0.000           |
| 0.009          | 0.000           | 0.024           | 0.795           | 0.021           | 0.058           | 0.000           | 0.327           | 3.364           | 0.000           | 3.209           | 5.320           | 0.020           | 0.059           | 0.071           | 0.043           |
| 0.019          | 0.072           | 0.000           | 0.855           | 0.000           | 0.062           | 0.000           | 0.150           | 1.787           | 0.000           | 3.450           | 5.707           | 0.021           | 0.018           | 0.000           | 0.000           |
| 0.009          | 0.000           | 0.000           | 0.958           | 0.046           | 0.000           | 0.056           | 0.264           | 1.517           | 0.000           | 2.578           | 6.128           | 0.175           | 0.009           | 0.000           | 0.047           |
| 0.000          | 0.000           | 0.000           | 0.385           | 0.182           | 0.056           | 0.000           | 0.539           | 1.838           | 0.068           | 2.339           | 4.105           | 0.097           | 0.008           | 0.069           | 0.041           |
| 0.000          | 0.178           | 0.168           | 0.407           | 0.000           | 0.000           | 0.000           | 0.497           | 2.714           | 0.000           | 2.447           | 6.249           | 0.249           | 0.039           | 0.000           | 0.000           |
| 0.000          | 0.000           | 0.000           | 0.923           | 0.000           | 0.000           | 0.000           | 0.396           | 1.470           | 0.000           | 1.713           | 2.926           | 0.000           | 0.000           | 0.000           | 0.000           |
| 0.000          | 0.000           | 0.000           | 0.963           | 0.072           | 0.067           | 0.000           | 0.408           | 1.005           | 0.040           | 2.850           | 5.839           | 0.138           | 0.049           | 0.000           | 0.049           |
| 0.009          | 0.109           | 0.000           | 0.477           | 0.182           | 0.000           | 0.000           | 0.538           | 1.941           | 0.000           | 2.251           | 5.665           | 0.152           | 0.018           | 0.078           | 0.023           |
| 0.009          | 0.000           | 0.000           | 0.646           | 0.068           | 0.031           | 0.000           | 0.232           | 1.843           | 0.076           | 2.920           | 3.695           | 0.151           | 0.027           | 0.000           | 0.000           |
| 0.009          | 0.000           | 0.000           | 0.803           | 0.021           | 0.029           | 0.000           | 0.211           | 1.560           | 0.035           | 3.416           | 7.031           | 0.101           | 0.017           | 0.000           | 0.022           |
| 0.000          | 0.000           | 0.000           | 0.946           | 0.024           | 0.000           | 0.000           | 0.378           | 2.974           | 0.000           | 2.856           | 5.728           | 0.163           | 0.032           | 0.000           | 0.000           |
| 0.000          | 0.000           | 0.000           | 0.442           | 0.054           | 0.000           | 0.000           | 0.655           | 5.647           | 0.129           | 1.749           | 6.441           | 0.185           | 0.094           | 0.000           | 0.039           |
| 0.000          | 0.000           | 0.023           | 0.805           | 0.040           | 0.000           | 0.000           | 0.729           | 0.687           | 0.034           | 3.549           | 4.342           | 0.096           | 0.016           | 0.069           | 0.123           |
| 0.000          | 0.000           | 0.024           | 0.658           | 0.173           | 0.030           | 0.000           | 0.416           | 1.515           | 0.036           | 3.823           | 4.156           | 0.103           | 0.026           | 0.000           | 0.088           |
| 0.000          | 0.000           | 0.000           | 0.917           | 0.000           | 0.067           | 0.000           | 0.328           | 9.994           | 0.000           | 1.864           | 5.692           | 0.092           | 0.000           | 0.000           | 0.025           |
| 0.000          | 0.000           | 0.000           | 1.167           | 0.066           | 0.000           | 0.000           | 0.566           | 2.116           | 0.000           | 2.596           | 3.966           | 0.042           | 0.016           | 0.000           | 0.067           |
| 0.018          | 0.000           | 0.000           | 0.727           | 0.000           | 0.000           | 0.000           | 0.425           | 5.950           | 0.000           | 3.961           | 6.428           | 0.203           | 0.000           | 0.000           | 0.000           |
| 0.000          | 0.000           | 0.000           | 0.646           | 0.000           | 0.000           | 0.000           | 0.319           | 25.036          | 0.000           | 2.557           | 7.326           | 0.054           | 0.000           | 0.000           | 0.097           |
| 0.016          | 0.000           | 0.000           | 0.215           | 0.038           | 0.000           | 0.000           | 0.425           | 6.696           | 0.000           | 3.075           | 5.220           | 0.072           | 0.000           | 0.000           | 0.153           |
| 0.000          | 0.047           | 0.000           | 0.283           | 0.000           | 0.000           | 0.000           | 0.160           | 39.862          | 0.000           | 2.641           | 6.026           | 0.057           | 0.000           | 0.000           | 0.000           |
| 0.000          | 0.000           | 0.000           | 0.948           | 0.000           | 0.030           | 0.000           | 0.233           | 1.806           | 0.000           | 1.957           | 5.901           | 0.104           | 0.008           | 0.000           | 0.000           |
| 0.000          | 0.000           | 0.000           | 0.417           | 0.000           | 0.000           | 0.000           | 0.327           | 1.682           | 0.000           | 1.652           | 6.859           | 0.042           | 0.000           | 0.000           | 0.069           |
| 0.000          | 0.032           | 0.000           | 1.133           | 0.040           | 0.000           | 0.000           | 0.239           | 2.782           | 0.000           | 3.605           | 4.629           | 0.057           | 0.032           | 0.              |                 |

| ENSG0000021466 | ENSG0000013776 | ENSG00000244753 | ENSG0000012002 | ENSG0000013376 | ENSG0000011865 | ENSG0000017104 | ENSG0000026170 | ENSG0000013114 | ENSG00000074219 | ENSG00000187166 | ENSG0000018236 | ENSG0000024989 | ENSG0000018073 | ENSG0000029345 | ENSG0000017270 |
|----------------|----------------|-----------------|----------------|----------------|----------------|----------------|----------------|----------------|-----------------|-----------------|----------------|----------------|----------------|----------------|----------------|
| 0.159          | 6.948          | 0.175           | 36.113         | 2.945          | 4.083          | 8.351          | 0.022          | 0.000          | 5.191           | 0.095           | 68.606         | 0.049          | 0.189          | 0.000          | 7.356          |
| 0.135          | 5.933          | 0.148           | 99.985         | 1.602          | 3.146          | 5.751          | 0.014          | 0.000          | 14.193          | 0.049           | 6.791          | 0.200          | 0.064          | 0.000          | 14.022         |
| 0.264          | 8.280          | 0.099           | 39.118         | 3.776          | 6.594          | 2.065          | 0.081          | 0.000          | 16.172          | 0.000           | 20.780         | 0.000          | 0.057          | 1.055          | 13.796         |
| 0.163          | 8.467          | 0.187           | 76.470         | 3.162          | 4.858          | 6.766          | 0.042          | 0.000          | 16.398          | 0.082           | 7.553          | 0.005          | 0.172          | 0.000          | 21.402         |
| 0.091          | 6.066          | 0.163           | 141.069        | 3.104          | 3.576          | 2.976          | 0.065          | 0.000          | 15.265          | 0.145           | 6.265          | 0.002          | 0.152          | 0.000          | 13.261         |
| 0.311          | 9.640          | 0.033           | 19.653         | 6.004          | 4.935          | 5.004          | 0.053          | 0.052          | 14.872          | 0.215           | 51.452         | 0.025          | 0.123          | 2.408          | 7.742          |
| 0.108          | 8.347          | 0.037           | 43.061         | 3.205          | 6.146          | 3.372          | 0.014          | 0.030          | 15.786          | 0.129           | 12.028         | 0.046          | 0.043          | 0.000          | 12.521         |
| 0.057          | 4.202          | 0.078           | 39.838         | 1.380          | 3.062          | 4.529          | 0.010          | 0.000          | 2.997           | 0.085           | 28.483         | 0.010          | 0.034          | 0.104          | 8.143          |
| 0.395          | 3.509          | 0.272           | 49.334         | 2.759          | 3.531          | 5.474          | 0.022          | 0.000          | 8.158           | 0.138           | 27.945         | 0.011          | 0.026          | 0.000          | 16.283         |
| 0.192          | 4.278          | 0.264           | 50.079         | 1.638          | 3.053          | 2.394          | 0.000          | 0.105          | 6.093           | 0.057           | 3.152          | 0.099          | 0.228          | 0.000          | 20.849         |
| 0.165          | 6.075          | 0.164           | 62.748         | 2.205          | 2.801          | 5.052          | 0.032          | 0.052          | 5.778           | 0.325           | 15.339         | 0.109          | 0.056          | 0.000          | 15.369         |
| 0.049          | 9.978          | 0.101           | 71.664         | 4.241          | 5.855          | 3.022          | 0.045          | 0.000          | 9.425           | 0.029           | 4.239          | 0.042          | 0.106          | 0.089          | 8.135          |
| 0.201          | 5.731          | 0.035           | 72.676         | 2.586          | 4.977          | 3.293          | 0.021          | 0.000          | 12.924          | 0.030           | 36.369         | 0.013          | 0.100          | 0.000          | 12.812         |
| 0.141          | 8.649          | 0.129           | 137.385        | 4.048          | 5.292          | 4.617          | 0.032          | 0.000          | 8.807           | 0.141           | 13.742         | 0.024          | 0.112          | 0.043          | 9.360          |
| 0.105          | 5.160          | 0.288           | 79.031         | 3.125          | 9.085          | 4.568          | 0.000          | 0.000          | 10.174          | 0.063           | 11.519         | 0.072          | 0.249          | 0.000          | 13.455         |
| 0.186          | 9.448          | 0.085           | 51.554         | 1.984          | 4.002          | 4.920          | 0.038          | 0.026          | 2.563           | 0.028           | 3.320          | 0.067          | 0.103          | 0.000          | 5.775          |
| 0.109          | 6.003          | 0.075           | 60.846         | 4.720          | 2.068          | 4.212          | 0.028          | 0.030          | 7.672           | 0.065           | 28.332         | 0.009          | 0.118          | 0.000          | 9.913          |
| 0.064          | 1.965          | 0.222           | 55.785         | 2.142          | 2.528          | 2.957          | 0.038          | 0.035          | 31.270          | 0.019           | 13.699         | 0.017          | 0.038          | 0.885          | 19.992         |
| 0.049          | 4.811          | 0.169           | 107.195        | 4.120          | 3.436          | 4.837          | 0.029          | 0.000          | 11.301          | 0.103           | 8.584          | 0.017          | 0.097          | 0.000          | 16.920         |
| 0.131          | 6.907          | 0.072           | 57.679         | 4.933          | 4.265          | 6.961          | 0.022          | 0.000          | 15.923          | 0.110           | 14.872         | 0.027          | 0.062          | 0.000          | 10.558         |
| 0.140          | 1.934          | 0.192           | 62.018         | 3.104          | 2.782          | 3.536          | 0.014          | 0.000          | 15.322          | 0.050           | 9.512          | 0.000          | 0.011          | 0.051          | 27.649         |
| 0.520          | 12.959         | 0.000           | 22.235         | 3.116          | 6.050          | 5.797          | 0.089          | 0.000          | 11.915          | 0.243           | 36.309         | 0.040          | 0.183          | 0.000          | 4.447          |
| 0.028          | 4.191          | 0.039           | 75.458         | 2.289          | 3.755          | 3.161          | 0.053          | 0.000          | 8.015           | 0.051           | 23.424         | 0.000          | 0.078          | 0.052          | 16.998         |
| 0.024          | 5.910          | 0.033           | 62.196         | 2.161          | 3.270          | 2.448          | 0.008          | 0.000          | 17.364          | 0.029           | 1.402          | 0.351          | 0.029          | 0.000          | 10.532         |
| 0.027          | 6.986          | 0.074           | 121.314        | 2.375          | 4.562          | 3.806          | 0.082          | 0.000          | 8.949           | 0.019           | 9.779          | 0.258          | 0.064          | 0.000          | 10.407         |
| 0.250          | 7.362          | 0.268           | 106.630        | 3.884          | 5.602          | 5.078          | 0.047          | 0.000          | 4.525           | 0.033           | 46.625         | 0.010          | 0.044          | 0.000          | 9.093          |
| 0.157          | 4.296          | 0.046           | 44.746         | 1.722          | 3.578          | 13.148         | 0.021          | 0.000          | 10.121          | 0.170           | 6.048          | 0.049          | 0.067          | 0.000          | 11.171         |
| 0.111          | 1.111          | 0.152           | 71.295         | 3.345          | 4.365          | 4.967          | 0.019          | 0.000          | 17.966          | 0.033           | 14.321         | 0.048          | 0.088          | 0.000          | 8.455          |
| 0.303          | 9.102          | 0.083           | 54.072         | 1.453          | 2.892          | 2.828          | 0.084          | 0.000          | 11.494          | 0.430           | 22.418         | 0.019          | 0.022          | 0.000          | 14.962         |
| 0.499          | 7.983          | 0.038           | 50.294         | 2.983          | 3.222          | 2.343          | 0.089          | 0.000          | 25.747          | 0.063           | 3.926          | 0.014          | 0.044          | 0.000          | 14.860         |
| 0.048          | 5.500          | 0.157           | 64.227         | 2.941          | 5.770          | 2.984          | 0.012          | 0.000          | 5.265           | 0.027           | 20.887         | 0.031          | 0.018          | 0.000          | 13.765         |
| 0.406          | 10.453         | 0.033           | 53.477         | 3.930          | 3.757          | 5.011          | 0.114          | 0.000          | 6.387           | 0.143           | 11.391         | 0.000          | 0.104          | 0.000          | 12.422         |
| 0.139          | 6.576          | 0.268           | 128.148        | 1.090          | 2.068          | 4.802          | 0.031          | 0.000          | 2.802           | 0.065           | 28.332         | 0.005          | 0.011          | 0.000          | 15.337         |
| 0.027          | 6.335          | 0.111           | 43.225         | 1.960          | 2.886          | 4.169          | 0.009          | 0.029          | 5.443           | 0.032           | 10.703         | 0.009          | 0.011          | 0.000          | 9.836          |
| 0.113          | 8.990          | 0.467           | 60.511         | 3.493          | 5.423          | 2.971          | 0.000          | 0.000          | 7.615           | 0.170           | 2.004          | 0.019          | 0.157          | 0.104          | 6.427          |
| 0.205          | 9.304          | 0.071           | 62.280         | 1.978          | 4.015          | 4.676          | 0.030          | 0.028          | 5.013           | 0.108           | 10.212         | 0.004          | 0.122          | 0.047          | 11.090         |
| 0.171          | 12.559         | 0.168           | 36.601         | 3.450          | 6.733          | 6.488          | 0.017          | 0.054          | 7.370           | 0.088           | 33.650         | 0.034          | 0.320          | 0.000          | 9.037          |
| 0.196          | 9.475          | 0.067           | 30.757         | 5.222          | 7.838          | 4.370          | 0.029          | 0.027          | 19.260          | 0.161           | 17.794         | 0.013          | 0.116          | 0.000          | 10.711         |
| 0.146          | 1.945          | 0.080           | 49.836         | 3.289          | 5.244          | 4.704          | 0.024          | 0.000          | 6.984           | 0.138           | 34.084         | 0.025          | 0.139          | 0.000          | 11.628         |
| 0.271          | 9.133          | 0.166           | 99.538         | 5.988          | 6.080          | 3.903          | 0.031          | 0.000          | 11.621          | 0.018           | 13.547         | 0.057          | 0.096          | 0.000          | 11.470         |
| 0.210          | 9.145          | 0.246           | 69.577         | 2.649          | 3.782          | 8.246          | 0.051          | 0.000          | 3.854           | 0.306           | 16.782         | 0.021          | 0.024          | 0.055          | 7.135          |
| 0.076          | 11.476         | 0.035           | 105.723        | 2.069          | 4.596          | 1.384          | 0.017          | 0.000          | 9.341           | 0.106           | 3.008          | 0.031          | 0.070          | 0.000          | 11.273         |
| 0.446          | 8.369          | 0.038           | 80.613         | 3.708          | 3.727          | 1.901          | 0.024          | 0.000          | 6.359           | 0.100           | 1.890          | 0.014          | 0.166          | 0.000          | 21.002         |
| 0.361          | 9.814          | 0.033           | 42.202         | 3.166          | 4.351          | 6.923          | 0.004          | 0.053          | 19.335          | 0.043           | 3.507          | 0.029          | 0.133          | 0.000          | 10.210         |
| 0.816          | 12.885         | 0.105           | 49.062         | 4.821          | 7.772          | 1.942          | 0.104          | 0.000          | 19.030          | 0.321           | 5.272          | 0.031          | 0.182          | 0.000          | 11.759         |
| 0.174          | 7.490          | 0.240           | 82.406         | 7.057          | 7.029          | 6.384          | 0.008          | 0.000          | 12.419          | 0.224           | 18.184         | 0.013          | 0.197          | 0.000          | 17.288         |
| 0.318          | 10.546         | 0.188           | 38.750         | 5.812          | 8.234          | 2.574          | 0.034          | 0.030          | 68.948          | 0.082           | 0.961          | 0.005          | 0.087          | 3.411          | 13.723         |
| 0.386          | 8.524          | 0.343           | 49.588         | 3.176          | 4.984          | 5.699          | 0.118          | 0.000          | 8.586           | 0.083           | 50.964         | 0.014          | 0.121          | 2.132          | 9.333          |
| 0.098          | 10.813         | 0.165           | 99.519         | 4.247          | 5.355          | 5.483          | 0.012          | 0.000          | 12.134          | 0.115           | 15.380         | 0.012          | 0.114          | 0.088          | 13.327         |
| 0.145          | 6.057          | 0.136           | 68.050         | 3.345          | 4.495          | 4.465          | 0.012          | 0.000          | 2.465           | 0.087           | 11.689         | 0.025          | 0.108          | 0.000          | 11.628         |
| 0.274          | 6.548          | 0.063           | 39.582         | 1.438          | 3.833          | 3.859          | 0.027          | 0.025          | 2.677           | 0.123           | 28.426         | 0.028          | 0.190          | 0.334          | 12.866         |
| 0.074          | 7.285          | 0.101           | 108.044        | 2.219          | 4.408          | 1.861          | 0.012          | 0.054          | 5.269           | 0.074           | 5.329          | 0.030          | 0.146          | 0.000          | 15.598         |
| 0.050          | 8.168          | 0.275           | 40.214         | 4.123          | 6.770          | 7.283          | 0.017          | 0.000          | 20.480          | 0.060           | 42.407         | 0.034          | 0.257          | 0.000          | 26.038         |
| 0.088          | 9.129          | 0.091           | 74.650         | 3.500          | 4.741          | 4.177          | 0.037          | 0.048          | 15.041          | 0.080           | 9.927          | 0.011          | 0.123          | 0.000          | 16.441         |
| 0.162          | 10.576         | 0.033           | 102.746        | 2.925          | 4.351          | 6.923          | 0.004          | 0.053          | 19.335          | 0.043           | 3.507          | 0.029          | 0.133          | 0.000          | 10.210         |
| 0.000          | 9.040          | 0.000           | 35.143         | 3.979          | 6.315          | 17.561         | 0.032          | 0.000          | 8.045           | 0.064           | 31.039         | 0.000          | 0.462          | 5.045          | 9.743          |
| 0.079          | 6.862          | 0.036           | 105.562        | 3.732          | 5.116          | 5.738          | 0.071          | 0.000          | 10.832          | 0.016           | 7.111          | 0.014          | 0.115          | 0.000          | 12.784         |
| 0.075          | 7.733          | 0.137           | 57.547         | 3.139          | 6.450          | 10.502         | 0.097          | 0.000          | 3.688           | 0.090           | 21.796         | 0.026          | 0.128          | 0.046          | 13.426         |
| 0.099          | 11.572         | 0.238           | 47.517         | 4.009          | 7.339          | 7.415          | 0.025          | 0.000          | 13.380          | 0.045           | 3.388          | 0.017          | 0.372          | 0.000          | 9.963          |
| 0.208          | 7.711          | 0.000           | 60.656         | 8.217          | 5.276          | 7.994          | 0.012          | 0.025          | 16.481          | 0.374           | 29.287         | 0.024          | 0.165          | 0.000          | 11.712         |
| 0.145          | 6.988          | 0.080           | 54.377         | 3.296          | 4.837          | 4.734          | 0.026          | 0.000          | 10.846          | 0.035           | 19.028         | 0.005          | 0.139          | 0.000          | 6.687          |
| 0.000          | 5.769          | 0.233           | 118.000        | 2.921          | 4.272          | 2.634          | 0.072          | 0.000          | 6.483           | 0.025           | 22.153         | 0.000          | 0.084          | 0.000          | 14.671         |
| 0.176          | 4.925          | 0.061           | 64.865         | 3.673          | 4.413          | 5.750          | 0.071          | 0.000          | 3.206           | 0.053           | 41.224         | 0.015          | 0.192          | 0.040          | 6.000          |
| 0.094          | 5.979          | 0.097           | 140.043        | 5.551          | 7.645          | 5.817          | 0.012          | 0.052          | 11.870          | 0.071           | 2.420          | 0.012          | 0.140          | 0.000          | 13.858         |
| 0.132          | 5.395          | 0.072           | 70.697         | 4.810          | 5.790          | 6.804          | 0.063          | 0.000          | 22.284          | 0.000           | 12.893         | 0.005          | 0.094          | 1.157          | 10.552         |
| 0.076          | 9.140          | 0.033           | 42.202         | 3.166          | 4.351          | 6.923          | 0.004          | 0.053          | 19.335          | 0.043           | 3.507          | 0.029          | 0.133          | 0.000          | 10.210         |
| 0.232          | 4.946          | 0.046           | 58.801         | 4.420          | 6.455          | 4.626          | 0.016          | 0.000          | 7.553           | 0.056           | 29.704         | 0.000          | 0.165          | 0.000          | 13.232         |
| 0.000          | 3.165          | 0.000           | 208.920        | 3.177          | 2.908          | 4.890          | 0.021          | 0.000          | 15.438          | 0.037           | 12.365         | 0.000          | 0.098          | 0.000          | 23.519         |
| 0.288          | 8.434          | 0.113           | 37.001         | 7.534          | 7.131          | 8.471          | 0.001          | 0.000          | 10.979          | 0.000           | 0.642          | 0.007          | 0.195          | 0.000          | 11.979         |
| 0.065          | 4.162          | 0.089           | 84.943         | 3.128          | 5.472          | 5.889          | 0.022          | 0.000          | 8.289           | 0.019           | 22.204         | 0.011          | 0.129          | 0.000          | 14.578         |
| 0.047          | 7.520          | 0.098           | 54.889         | 4.279          | 4.743          | 5.135          | 0.008          | 0.026          | 17.047          | 0.000           | 9.994          | 0.008          | 0.122          | 0.000          | 16.194         |
| 0.100          | 11.620         | 0.045           | 99.245         | 4.837          | 5.244          | 4.704          | 0.024          | 0.000          |                 |                 |                |                |                |                |                |

| ENSG00000004852 | ENSG00000100055 | ENSG00000001666 | ENSG00000251281 | ENSG00000166619 | ENSG00000272623 | ENSG00000274333 | ENSG00000272627 | ENSG00000280333 | ENSG00000285194 | ENSG000000992208 | ENSG00000189241 | ENSG00000268421 | ENSG00000101951 | ENSG00000296119 | ENSG00000118849 |
|-----------------|-----------------|-----------------|-----------------|-----------------|-----------------|-----------------|-----------------|-----------------|-----------------|------------------|-----------------|-----------------|-----------------|-----------------|-----------------|
| 2014            | 4467            | 0325            | 0058            | 11.977          | 0.978           | 0.393           | 0.050           | 0.185           | 0.049           | 3.020            | 29.839          | 0.000           | 0.000           | 0.000           | 1.671           |
| 1473            | 6079            | 0039            | 0050            | 7.800           | 0.384           | 0.549           | 0.043           | 0.000           | 0.112           | 4.008            | 20.169          | 0.204           | 0.000           | 0.000           | 21.343          |
| 1853            | 4554            | 1728            | 0000            | 14.051          | 0.285           | 0.638           | 0.114           | 0.000           | 0.012           | 7.457            | 29.204          | 0.086           | 0.000           | 0.000           | 0.712           |
| 3432            | 1446            | 0205            | 0000            | 12.708          | 0.451           | 0.217           | 0.043           | 0.158           | 0.141           | 6.059            | 21.620          | 0.012           | 0.011           | 0.000           | 0.958           |
| 1894            | 6375            | 0375            | 0000            | 9.514           | 0.072           | 0.262           | 0.103           | 0.000           | 0.030           | 4.155            | 16.422          | 0.000           | 0.000           | 0.000           | 6.877           |
| 0988            | 6715            | 4361            | 0000            | 12.108          | 0.487           | 0.427           | 0.114           | 0.418           | 0.773           | 6.598            | 27.333          | 0.359           | 0.000           | 0.000           | 0.083           |
| 1882            | 15.687          | 0.145           | 0000            | 13.654          | 0.255           | 0.477           | 0.043           | 1.254           | 0.271           | 4.371            | 16.828          | 0.036           | 0.000           | 0.000           | 3.607           |
| 1407            | 10.810          | 0.362           | 0000            | 19.660          | 1.283           | 0.530           | 0.090           | 0.000           | 0.015           | 3.825            | 62.510          | 0.000           | 0.000           | 0.000           | 5.484           |
| 2124            | 4.600           | 0.337           | 0000            | 13.264          | 0.780           | 1.457           | 0.104           | 0.192           | 0.094           | 6.610            | 18.160          | 0.044           | 0.000           | 0.000           | 0.032           |
| 0972            | 14.875          | 0.059           | 0000            | 7.900           | 0.000           | 1.357           | 0.000           | 0.558           | 0.025           | 4.840            | 16.647          | 0.000           | 0.000           | 0.000           | 37.952          |
| 1150            | 6.887           | 0.338           | 0000            | 11.368          | 0.725           | 0.438           | 0.261           | 0.000           | 0.030           | 4.755            | 16.422          | 0.000           | 0.000           | 0.000           | 0.031           |
| 2332            | 4.716           | 0.068           | 0000            | 13.884          | 0.578           | 0.431           | 0.077           | 0.567           | 0.006           | 3.820            | 26.398          | 0.011           | 0.000           | 0.000           | 3.553           |
| 3197            | 4.628           | 0.211           | 0000            | 17.040          | 0.477           | 0.334           | 0.040           | 0.148           | 0.078           | 4.012            | 28.886          | 0.056           | 0.000           | 0.000           | 0.588           |
| 1326            | 5.298           | 0.056           | 0000            | 15.818          | 0.279           | 0.354           | 0.037           | 0.274           | 0.043           | 3.310            | 28.821          | 0.042           | 0.000           | 0.000           | 0.223           |
| 0733            | 7.335           | 0.325           | 0000            | 15.007          | 0.745           | 1.020           | 0.000           | 0.000           | 0.000           | 4.131            | 28.380          | 0.000           | 0.000           | 0.000           | 2.230           |
| 1257            | 25.756          | 0.188           | 1.857           | 10.330          | 0.279           | 0.229           | 0.112           | 0.548           | 0.079           | 1.929            | 33.349          | 0.126           | 0.000           | 0.000           | 7.726           |
| 4085            | 2.453           | 0.768           | 0000            | 20.842          | 0.322           | 0.457           | 0.043           | 0.000           | 0.091           | 5.878            | 28.477          | 0.038           | 0.000           | 0.000           | 1.761           |
| 0950            | 5.164           | 2.952           | 0000            | 13.465          | 1.222           | 2.111           | 0.153           | 0.000           | 0.025           | 10.303           | 10.752          | 0.000           | 0.000           | 0.000           | 0.438           |
| 1888            | 9.560           | 0.035           | 0000            | 12.399          | 0.407           | 0.391           | 0.039           | 0.000           | 0.051           | 4.109            | 20.584          | 0.153           | 0.000           | 0.000           | 0.898           |
| 2112            | 5.535           | 0.106           | 0000            | 9.898           | 0.062           | 0.255           | 0.041           | 0.153           | 0.000           | 3.892            | 12.343          | 0.012           | 0.000           | 0.000           | 0.987           |
| 1783            | 3.778           | 0.046           | 0000            | 8.722           | 0.994           | 1.039           | 0.088           | 0.000           | 0.029           | 9.451            | 15.788          | 0.062           | 0.000           | 0.000           | 2.183           |
| 2782            | 2.223           | 1.135           | 0000            | 20.463          | 1.575           | 0.409           | 0.046           | 0.168           | 0.052           | 3.702            | 82.089          | 0.502           | 0.000           | 0.000           | 0.463           |
| 4882            | 5.452           | 0.003           | 0000            | 14.659          | 1.472           | 1.049           | 0.000           | 0.821           | 0.044           | 8.433            | 29.949          | 0.000           | 0.000           | 0.000           | 0.027           |
| 1884            | 5.359           | 0.060           | 0000            | 9.201           | 0.057           | 0.425           | 0.000           | 0.000           | 0.000           | 2.145            | 21.389          | 0.000           | 0.000           | 0.000           | 12.999          |
| 1113            | 15.415          | 0.067           | 0000            | 12.297          | 0.190           | 0.260           | 0.000           | 0.000           | 0.028           | 3.607            | 26.003          | 0.012           | 0.000           | 0.000           | 4.989           |
| 1279            | 8.899           | 1.207           | 0051            | 13.112          | 0.461           | 0.246           | 0.088           | 0.162           | 0.180           | 2.697            | 23.734          | 0.012           | 0.000           | 0.000           | 5.789           |
| 3002            | 9.783           | 1.729           | 0000            | 15.194          | 0.522           | 0.301           | 0.000           | 0.163           | 0.122           | 3.070            | 22.515          | 0.028           | 0.000           | 0.000           | 1.711           |
| 1049            | 3.735           | 0.073           | 0000            | 10.805          | 0.377           | 0.362           | 0.088           | 0.000           | 0.057           | 6.125            | 25.261          | 0.025           | 0.000           | 0.000           | 1.650           |
| 1156            | 4.310           | 0.673           | 0000            | 19.360          | 1.111           | 0.391           | 0.044           | 0.000           | 0.014           | 2.853            | 19.957          | 0.000           | 0.000           | 0.000           | 1.933           |
| 2338            | 3.359           | 0.324           | 0000            | 11.443          | 0.986           | 0.962           | 0.000           | 0.323           | 0.007           | 6.047            | 17.757          | 0.000           | 0.011           | 0.000           | 0.832           |
| 1848            | 4.764           | 0.205           | 0000            | 19.873          | 1.108           | 0.646           | 0.072           | 0.000           | 0.024           | 3.927            | 20.869          | 0.010           | 0.000           | 0.000           | 1.146           |
| 1079            | 2.051           | 0.099           | 0000            | 14.199          | 0.453           | 0.550           | 0.000           | 0.278           | 0.062           | 3.843            | 24.386          | 0.064           | 0.000           | 0.000           | 0.392           |
| 4085            | 2.453           | 0.768           | 0000            | 20.842          | 0.322           | 0.457           | 0.043           | 0.000           | 0.091           | 5.878            | 28.477          | 0.038           | 0.000           | 0.000           | 1.761           |
| 0988            | 6.392           | 0.252           | 0000            | 13.250          | 0.381           | 0.237           | 0.085           | 0.156           | 0.000           | 2.749            | 15.838          | 0.000           | 0.000           | 0.000           | 4.039           |
| 2894            | 5.611           | 0.304           | 0000            | 11.569          | 0.403           | 0.501           | 0.000           | 1.318           | 0.000           | 2.284            | 28.565          | 0.000           | 0.000           | 0.000           | 24.088          |
| 1815            | 8.277           | 0.459           | 0000            | 24.610          | 0.790           | 0.454           | 0.081           | 0.149           | 0.046           | 3.333            | 41.011          | 0.011           | 0.000           | 0.000           | 1.270           |
| 0958            | 3.894           | 0.514           | 0000            | 17.716          | 0.232           | 0.260           | 0.077           | 0.713           | 0.127           | 4.345            | 22.246          | 0.033           | 0.000           | 0.000           | 0.547           |
| 2971            | 12.836          | 0.321           | 0000            | 19.094          | 0.252           | 0.108           | 0.116           | 0.000           | 0.171           | 4.452            | 27.000          | 0.000           | 0.000           | 0.000           | 2.175           |
| 4076            | 4.868           | 0.688           | 0000            | 18.243          | 0.415           | 0.284           | 0.132           | 0.284           | 0.000           | 3.124            | 31.258          | 0.000           | 0.000           | 0.000           | 1.577           |
| 2002            | 3.022           | 0.524           | 0000            | 8.512           | 0.857           | 0.320           | 0.143           | 0.175           | 0.296           | 6.806            | 21.905          | 0.027           | 0.000           | 0.000           | 0.568           |
| 1984            | 5.547           | 0.397           | 0000            | 15.717          | 0.498           | 0.159           | 0.095           | 0.000           | 0.054           | 2.171            | 22.210          | 0.000           | 0.012           | 0.000           | 2.730           |
| 2722            | 7.426           | 0.218           | 0000            | 13.620          | 0.961           | 0.157           | 0.080           | 0.295           | 0.092           | 5.083            | 28.162          | 0.000           | 0.000           | 0.000           | 2.405           |
| 3667            | 3.454           | 0.046           | 0000            | 13.055          | 0.132           | 0.420           | 0.000           | 0.000           | 0.022           | 5.989            | 22.940          | 0.012           | 0.000           | 0.000           | 0.934           |
| 4295            | 4.895           | 0.213           | 0000            | 9.250           | 0.341           | 0.276           | 0.000           | 0.279           | 0.056           | 4.440            | 21.244          | 0.060           | 0.000           | 0.000           | 0.651           |
| 1452            | 3.100           | 0.214           | 0000            | 12.401          | 1.089           | 0.700           | 0.000           | 0.445           | 0.013           | 4.684            | 27.759          | 0.000           | 0.000           | 0.000           | 0.258           |
| 0633            | 6.483           | 0.625           | 0000            | 12.418          | 0.354           | 0.419           | 0.039           | 0.145           | 0.039           | 5.296            | 27.710          | 0.000           | 0.000           | 0.000           | 0.816           |
| 0432            | 0.538           | 0.142           | 0000            | 17.146          | 0.065           | 0.606           | 0.390           | 0.797           | 0.128           | 6.930            | 32.751          | 0.000           | 0.000           | 0.000           | 0.803           |
| 3321            | 9.822           | 0.505           | 0000            | 13.234          | 1.118           | 0.393           | 0.088           | 0.484           | 0.237           | 4.869            | 30.049          | 0.309           | 0.000           | 0.000           | 0.687           |
| 1749            | 3.250           | 0.336           | 0000            | 15.289          | 1.482           | 0.426           | 0.006           | 0.006           | 0.006           | 2.822            | 23.345          | 0.000           | 0.000           | 0.000           | 3.003           |
| 1049            | 3.735           | 0.073           | 0000            | 10.805          | 0.377           | 0.362           | 0.088           | 0.000           | 0.057           | 6.125            | 25.261          | 0.025           | 0.000           | 0.000           | 1.650           |
| 1826            | 3.796           | 0.203           | 0000            | 25.410          | 1.678           | 0.465           | 0.036           | 0.000           | 0.118           | 5.866            | 50.051          | 0.010           | 0.027           | 0.000           | 2.230           |
| 1689            | 8.594           | 0.048           | 0000            | 11.384          | 0.175           | 0.652           | 0.039           | 0.000           | 0.013           | 4.152            | 28.738          | 0.068           | 0.000           | 0.000           | 5.712           |
| 3600            | 5.621           | 0.150           | 0000            | 13.895          | 0.593           | 0.775           | 0.040           | 0.146           | 0.006           | 9.888            | 14.604          | 0.011           | 0.010           | 0.000           | 5.058           |
| 2602            | 4.856           | 0.030           | 0000            | 10.503          | 0.210           | 0.469           | 0.000           | 0.000           | 0.023           | 4.710            | 17.306          | 0.000           | 0.000           | 0.000           | 1.557           |
| 0172            | 0.345           | 0.000           | 0000            | 17.746          | 0.276           | 0.241           | 0.000           | 0.128           | 0.056           | 3.440            | 21.244          | 0.060           | 0.000           | 0.000           | 1.747           |
| 1091            | 1.543           | 0.734           | 0000            | 11.082          | 0.251           | 0.938           | 0.000           | 0.000           | 0.110           | 7.020            | 45.311          | 0.000           | 0.000           | 0.000           | 0.222           |
| 2476            | 5.486           | 0.599           | 0000            | 9.079           | 0.125           | 0.700           | 0.000           | 0.460           | 0.014           | 8.391            | 19.040          | 0.012           | 0.000           | 0.000           | 0.026           |
| 3430            | 4.642           | 1.181           | 0000            | 13.114          | 0.118           | 0.573           | 0.000           | 0.000           | 0.109           | 4.608            | 16.146          | 0.011           | 0.000           | 0.000           | 0.729           |
| 2405            | 4.916           | 1.877           | 0000            | 9.602           | 0.821           | 0.307           | 0.039           | 0.720           | 0.115           | 4.175            | 26.077          | 0.033           | 0.000           | 0.000           | 0.561           |
| 2367            | 3.643           | 0.410           | 0000            | 19.488          | 0.492           | 0.102           | 0.073           | 0.269           | 0.024           | 4.997            | 27.033          | 0.000           | 0.018           | 0.000           | 0.523           |
| 1145            | 2.753           | 0.214           | 0000            | 11.719          | 0.210           | 0.845           | 0.000           | 0.138           | 0.000           | 3.124            | 31.258          | 0.014           | 0.000           | 0.000           | 0.363           |
| 2002            | 3.022           | 0.524           | 0000            | 8.512           | 0.857           | 0.320           | 0.143           | 0.175           | 0.296           | 6.806            | 21.905          | 0.027           | 0.000           | 0.000           | 0.568           |
| 5510            | 1.244           | 5.969           | 0000            | 22.889          | 0.836           | 0.293           | 0.139           | 0.256           | 0.216           | 6.596            | 29.584          | 0.010           | 0.000           | 0.000           | 0.499           |
| 1590            | 6.803           | 0.381           | 0000            | 10.953          | 0.392           | 0.397           | 0.037           | 0.550           | 0.214           | 4.460            | 29.258          | 0.032           | 0.009           | 0.000           | 5.850           |
| 1806            | 2.013           | 1.394           | 0000            | 15.289          | 1.186           | 0.536           | 0.042           | 0.000           | 0.048           | 4.469            | 34.649          | 0.070           | 0.000           | 0.000           | 2.076           |
| 2176            | 4.265           | 0.213           | 0000            | 9.250           | 0.341           | 0.276           | 0.000           | 0.279           | 0.056           | 4.440            | 21.244          | 0.060           | 0.000           | 0.000           | 0.651           |
| 3107            | 2.226           | 0.883           | 0000            | 9.892           | 0.440           | 0.760           | 0.000           | 0.000           | 0.000           | 5.273            | 28.744          | 0.021           | 0.000           | 0.000           | 1.214           |
| 1435            | 0.979           | 0.038           | 0000            | 8.305           | 0.367           | 0.904           | 0.049           | 0.000           | 0.000           | 7.508            | 19.584          | 0.000           | 0.000           | 0.000           | 0.030           |
| 2981            | 2.915           | 0.213           | 0000            | 14.980          | 0.195           | 0.291           | 0.000           | 0.000           | 0.021           | 2.762            | 15.671          | 0.073           | 0.000           | 0.000           | 1.554           |
| 0553            | 2.583           | 0.074           | 0060            | 7.277           | 0.077           | 0.661           | 0.051           | 0.000           | 0.000           | 4.343            | 15.265          | 0.000           | 0.000           | 0.000           | 0.442           |
| 3902            | 4.775           | 0.135           | 0000            | 10.652          | 0.112           | 0.650           | 0.037           | 0.000           | 0.000           | 6.024            | 13.619          | 0.021           | 0.000           | 0.000           | 2.023           |
| 1176            | 3.416           | 0.000           | 0000            | 14.928          | 0.704           | 0.284           | 0.000           | 0.132           | 0.000           | 4.763            | 31.258          | 0.010           | 0.000           | 0.000           | 4.841           |
| 0860            | 5.737           | 0.175           | 0000            | 9.734           | 0.514           | 0.442           | 0.034           | 0.128           | 0.017           | 2.840            | 21.249          | 0.019           | 0.000           | 0.000           | 1.211           |

| ENSG0000017434 | ENSG00000143751 | ENSG0000025208 | ENSG0000010787 | ENSG00000162528 | ENSG00000254892 | ENSG00000272040 | ENSG00000239197 | ENSG0000012182 | ENSG00000131480 | ENSG00000266327 | ENSG00000202139 | ENSG00000265801 | ENSG00000275086 | ENSG0000024765 |
|----------------|-----------------|----------------|----------------|-----------------|-----------------|-----------------|-----------------|----------------|-----------------|-----------------|-----------------|-----------------|-----------------|----------------|
| 2352           | 8113            | 0.000          | 3935           | 0.136           | 0.000           | 0.679           | 0.000           | 0.066          | 0.158           | 0.000           | 0.105           | 0.026           | 0.000           | 0.074          |
| 1880           | 9772            | 0.000          | 7877           | 0.125           | 0.000           | 0.831           | 0.000           | 0.028          | 0.586           | 0.000           | 0.036           | 0.022           | 0.000           | 0.378          |
| 2987           | 8943            | 0.063          | 1480           | 0.239           | 0.000           | 0.449           | 0.000           | 0.012          | 0.409           | 0.000           | 0.064           | 0.040           | 0.000           | 0.168          |
| 3480           | 7601            | 0.000          | 2108           | 0.339           | 0.000           | 0.691           | 0.000           | 0.057          | 0.751           | 0.000           | 0.054           | 0.187           | 0.000           | 0.191          |
| 2090           | 6727            | 0.000          | 1325           | 0.097           | 0.000           | 0.987           | 0.000           | 0.075          | 0.266           | 0.000           | 0.063           | 0.020           | 0.000           | 0.707          |
| 2086           | 8263            | 0.000          | 2957           | 0.885           | 0.000           | 0.981           | 0.000           | 0.037          | 1.151           | 0.000           | 0.143           | 0.068           | 0.000           | 0.335          |
| 1996           | 7571            | 0.000          | 6549           | 0.211           | 0.000           | 1.008           | 0.030           | 0.070          | 0.292           | 0.000           | 0.054           | 0.015           | 0.000           | 2.830          |
| 2588           | 5035            | 0.000          | 4751           | 0.030           | 0.000           | 0.247           | 0.000           | 0.059          | 0.184           | 0.000           | 0.057           | 0.039           | 0.000           | 0.399          |
| 5169           | 7904            | 0.000          | 1491           | 0.164           | 0.000           | 0.704           | 0.037           | 0.051          | 0.493           | 0.000           | 0.000           | 0.018           | 0.000           | 0.615          |
| 1014           | 5940            | 0.000          | 3591           | 0.000           | 0.000           | 0.448           | 0.000           | 0.249          | 0.422           | 0.000           | 0.000           | 0.026           | 0.000           | 2.461          |
| 2325           | 6919            | 0.000          | 8922           | 0.109           | 0.000           | 0.865           | 0.000           | 0.069          | 0.269           | 0.000           | 0.031           | 0.043           | 0.000           | 1.863          |
| 1096           | 8065            | 0.000          | 2473           | 0.234           | 0.000           | 0.762           | 0.027           | 0.063          | 0.401           | 0.000           | 0.129           | 0.007           | 0.000           | 0.455          |
| 1109           | 7010            | 0.000          | 2010           | 0.089           | 0.000           | 0.538           | 0.000           | 0.131          | 0.339           | 0.000           | 0.083           | 0.014           | 0.000           | 0.294          |
| 1473           | 7391            | 0.000          | 3767           | 0.218           | 0.069           | 0.959           | 0.026           | 0.037          | 0.849           | 0.000           | 0.078           | 0.000           | 0.000           | 0.220          |
| 1479           | 6908            | 0.000          | 2357           | 0.112           | 0.000           | 0.420           | 0.000           | 0.164          | 0.215           | 0.000           | 0.209           | 0.000           | 0.000           | 0.245          |
| 0374           | 6784            | 0.000          | 6295           | 0.101           | 0.000           | 0.535           | 0.026           | 0.086          | 0.926           | 0.000           | 0.064           | 0.013           | 0.046           | 0.064          |
| 2882           | 8958            | 0.000          | 1178           | 0.164           | 0.000           | 0.363           | 0.000           | 0.056          | 0.528           | 0.000           | 0.036           | 0.045           | 0.000           | 0.063          |
| 8784           | 6246            | 0.000          | 0554           | 0.092           | 0.000           | 0.431           | 0.000           | 0.050          | 0.492           | 0.000           | 0.009           | 0.000           | 0.000           | 0.226          |
| 1320           | 6076            | 0.000          | 1375           | 0.140           | 0.000           | 0.377           | 0.000           | 0.051          | 0.274           | 0.000           | 0.065           | 0.000           | 0.000           | 0.802          |
| 1549           | 7488            | 0.000          | 3619           | 0.196           | 0.077           | 0.368           | 0.000           | 0.088          | 0.423           | 0.000           | 0.104           | 0.007           | 0.000           | 0.122          |
| 7100           | 7342            | 0.000          | 1670           | 0.030           | 0.000           | 0.149           | 0.000           | 0.000          | 0.082           | 0.000           | 0.037           | 0.008           | 0.000           | 0.653          |
| 0943           | 7211            | 0.000          | 8922           | 0.720           | 0.000           | 0.579           | 0.000           | 0.075          | 0.729           | 0.000           | 0.096           | 0.040           | 0.000           | 0.067          |
| 4557           | 4547            | 0.000          | 1835           | 0.111           | 0.000           | 0.490           | 0.000           | 0.015          | 0.472           | 0.000           | 0.037           | 0.062           | 0.000           | 1.516          |
| 2182           | 7816            | 0.000          | 5470           | 0.043           | 0.000           | 0.273           | 0.027           | 0.075          | 0.063           | 0.000           | 0.064           | 0.000           | 0.000           | 0.280          |
| 0967           | 8608            | 0.000          | 2286           | 0.067           | 0.079           | 0.482           | 0.000           | 0.028          | 0.534           | 0.000           | 0.053           | 0.022           | 0.000           | 0.437          |
| 1888           | 8863            | 0.000          | 3300           | 0.297           | 0.000           | 0.965           | 0.000           | 0.058          | 0.228           | 0.000           | 0.055           | 0.023           | 0.050           | 0.519          |
| 3138           | 5058            | 0.000          | 1337           | 0.112           | 0.000           | 0.336           | 0.000           | 0.063          | 0.249           | 0.000           | 0.063           | 0.234           | 0.114           | 0.361          |
| 3419           | 5941            | 0.000          | 7485           | 0.059           | 0.000           | 0.553           | 0.000           | 0.000          | 0.227           | 0.000           | 0.257           | 0.015           | 0.000           | 0.129          |
| 3235           | 4279            | 0.000          | 4465           | 0.128           | 0.000           | 2.100           | 0.031           | 0.000          | 0.332           | 0.000           | 0.037           | 0.030           | 0.050           | 0.901          |
| 6238           | 5489            | 0.000          | 1435           | 0.257           | 0.000           | 1.390           | 0.000           | 0.029          | 0.505           | 0.000           | 0.129           | 0.023           | 0.000           | 0.388          |
| 4125           | 6194            | 0.000          | 1274           | 0.065           | 0.000           | 0.335           | 0.000           | 0.012          | 0.328           | 0.000           | 0.061           | 0.000           | 0.000           | 0.286          |
| 1940           | 6453            | 0.000          | 0572           | 0.221           | 0.070           | 1.821           | 0.000           | 0.000          | 0.568           | 0.000           | 0.063           | 0.026           | 0.000           | 0.167          |
| 3123           | 8945            | 0.000          | 3153           | 0.059           | 0.000           | 0.363           | 0.000           | 0.014          | 0.855           | 0.000           | 0.055           | 0.008           | 0.000           | 0.974          |
| 2507           | 5054            | 0.000          | 1882           | 0.057           | 0.000           | 1.164           | 0.000           | 0.028          | 0.149           | 0.000           | 0.018           | 0.015           | 0.000           | 1.001          |
| 3146           | 9507            | 0.000          | 2542           | 0.201           | 0.000           | 1.211           | 0.000           | 0.059          | 0.150           | 0.000           | 0.150           | 0.000           | 0.000           | 0.793          |
| 1878           | 6122            | 0.000          | 2541           | 0.137           | 0.000           | 0.617           | 0.000           | 0.133          | 0.203           | 0.000           | 0.034           | 0.007           | 0.000           | 0.539          |
| 1944           | 5583            | 0.000          | 3361           | 0.697           | 0.144           | 1.080           | 0.000           | 0.051          | 0.216           | 0.000           | 0.049           | 0.216           | 0.000           | 1.258          |
| 0108           | 8757            | 0.000          | 5199           | 0.444           | 0.000           | 0.915           | 0.000           | 0.064          | 0.258           | 0.000           | 0.032           | 0.000           | 0.000           | 0.971          |
| 1523           | 8941            | 0.000          | 2988           | 0.197           | 0.000           | 0.468           | 0.000           | 0.081          | 0.468           | 0.000           | 0.051           | 0.217           | 0.000           | 0.613          |
| 1835           | 9388            | 0.000          | 2816           | 0.172           | 0.000           | 1.108           | 0.000           | 0.047          | 0.734           | 0.000           | 0.080           | 0.008           | 0.055           | 0.483          |
| 1270           | 7597            | 0.000          | 1924           | 0.256           | 0.000           | 0.802           | 0.000           | 0.218          | 0.229           | 0.000           | 0.060           | 0.008           | 0.054           | 0.700          |
| 0738           | 8699            | 0.000          | 2169           | 0.162           | 0.000           | 0.559           | 0.000           | 0.040          | 0.238           | 0.000           | 0.084           | 0.028           | 0.000           | 0.474          |
| 2412           | 8035            | 0.000          | 1997           | 0.228           | 0.000           | 0.615           | 0.000           | 0.029          | 0.172           | 0.000           | 0.074           | 0.000           | 0.051           | 0.391          |
| 1479           | 7967            | 0.000          | 2943           | 0.264           | 0.000           | 0.962           | 0.000           | 0.062          | 0.323           | 0.000           | 0.046           | 0.007           | 0.000           | 0.391          |
| 5311           | 10767           | 0.000          | 2943           | 0.445           | 0.000           | 1.483           | 0.000           | 0.013          | 0.337           | 0.000           | 0.000           | 0.007           | 0.000           | 0.298          |
| 2130           | 6816            | 0.000          | 1542           | 0.283           | 0.000           | 0.482           | 0.028           | 0.028          | 0.475           | 0.000           | 0.116           | 0.089           | 0.000           | 0.465          |
| 1209           | 20893           | 0.000          | 14782          | 0.527           | 0.081           | 0.348           | 0.000           | 0.057          | 0.499           | 0.034           | 0.073           | 0.023           | 0.000           | 0.384          |
| 2496           | 7411            | 0.000          | 3486           | 0.336           | 0.000           | 0.964           | 0.000           | 0.101          | 0.627           | 0.000           | 0.000           | 0.000           | 0.000           | 0.389          |
| 2419           | 9026            | 0.000          | 1232           | 0.120           | 0.000           | 0.530           | 0.000           | 0.038          | 0.134           | 0.000           | 0.006           | 0.013           | 0.000           | 0.112          |
| 1419           | 4571            | 0.000          | 3490           | 0.057           | 0.000           | 0.137           | 0.000           | 0.000          | 0.137           | 0.000           | 0.059           | 0.000           | 0.174           | 0.848          |
| 4432           | 6425            | 0.000          | 4846           | 0.106           | 0.000           | 0.338           | 0.000           | 0.107          | 0.463           | 0.000           | 0.045           | 0.025           | 0.041           | 0.427          |
| 0845           | 7544            | 0.000          | 1604           | 0.131           | 0.000           | 0.295           | 0.000           | 0.064          | 0.303           | 0.000           | 0.065           | 0.007           | 0.000           | 0.860          |
| 1963           | 8560            | 0.000          | 2563           | 0.089           | 0.000           | 0.301           | 0.000           | 0.026          | 0.227           | 0.000           | 0.083           | 0.000           | 0.000           | 0.175          |
| 1365           | 8324            | 0.000          | 1813           | 0.094           | 0.000           | 0.502           | 0.000           | 0.034          | 0.292           | 0.000           | 0.117           | 0.000           | 0.000           | 0.103          |
| 3375           | 8429            | 0.000          | 1478           | 0.130           | 0.000           | 0.789           | 0.148           | 0.000          | 0.789           | 0.000           | 0.044           | 0.000           | 0.000           | 0.391          |
| 1870           | 12021           | 0.000          | 4381           | 0.226           | 0.000           | 0.921           | 0.000           | 0.276          | 0.591           | 0.000           | 0.281           | 0.204           | 0.000           | 0.810          |
| 1929           | 11889           | 0.000          | 3351           | 0.047           | 0.000           | 0.757           | 0.000           | 0.041          | 0.673           | 0.000           | 0.087           | 0.007           | 0.000           | 0.000          |
| 2723           | 8718            | 0.000          | 1756           | 0.284           | 0.000           | 0.715           | 0.000           | 0.091          | 0.658           | 0.000           | 0.050           | 0.021           | 0.000           | 0.233          |
| 3972           | 8493            | 0.000          | 5791           | 0.158           | 0.000           | 0.430           | 0.000           | 0.103          | 0.428           | 0.000           | 0.148           | 0.048           | 0.000           | 0.462          |
| 2038           | 8666            | 0.000          | 1413           | 0.115           | 0.000           | 0.509           | 0.000           | 0.060          | 0.183           | 0.000           | 0.077           | 0.108           | 0.000           | 0.108          |
| 5003           | 8511            | 0.000          | 2911           | 0.465           | 0.000           | 0.778           | 0.000           | 0.241          | 0.723           | 0.000           | 0.212           | 0.401           | 0.000           | 0.613          |
| 5003           | 8352            | 0.000          | 1415           | 0.181           | 0.000           | 0.622           | 0.000           | 0.044          | 0.621           | 0.000           | 0.169           | 0.000           | 0.000           | 0.099          |
| 1808           | 8649            | 0.000          | 2815           | 0.298           | 0.000           | 0.883           | 0.025           | 0.023          | 1.119           | 0.000           | 0.102           | 0.467           | 0.000           | 0.206          |
| 1626           | 11383           | 0.000          | 3288           | 0.513           | 0.070           | 0.931           | 0.000           | 0.037          | 0.381           | 0.000           | 0.125           | 0.026           | 0.000           | 0.662          |
| 2389           | 8389            | 0.000          | 7322           | 0.122           | 0.000           | 0.528           | 0.000           | 0.041          | 0.131           | 0.000           | 0.035           | 0.288           | 0.000           | 0.184          |
| 5237           | 5020            | 0.000          | 0169           | 0.452           | 0.000           | 0.452           | 0.000           | 0.452          | 0.452           | 0.000           | 0.452           | 0.007           | 0.000           | 0.000          |
| 3479           | 9322            | 0.000          | 0880           | 0.149           | 0.000           | 0.210           | 0.000           | 0.048          | 0.056           | 0.000           | 0.123           | 0.000           | 0.000           | 0.108          |
| 2101           | 7532            | 0.000          | 0704           | 0.044           | 0.000           | 0.579           | 0.000           | 0.080          | 0.454           | 0.000           | 0.041           | 0.009           | 0.056           | 0.144          |
| 0943           | 11266           | 0.000          | 1509           | 0.117           | 0.000           | 0.550           | 0.000           | 0.021          | 0.072           | 0.000           | 0.109           | 0.011           | 0.000           | 0.288          |
| 5732           | 7406            | 0.000          | 1142           | 0.023           | 0.000           | 0.239           | 0.000           | 0.118          | 0.057           | 0.000           | 0.172           | 0.000           | 0.000           | 0.076          |
| 5765           | 10096           | 0.000          | 1213           | 0.034           | 0.000           | 0.411           | 0.000           | 0.025          | 0.181           | 0.000           | 0.063           | 0.007           | 0.000           | 0.055          |
| 1803           | 4948            | 0.000          | 2988           | 0.102           | 0.000           | 0.295           | 0.000           | 0.029          | 0.320           | 0.000           | 0.042           | 0.000           | 0.000           | 0.000          |
| 0812           | 5482            | 0.000          | 1576           | 0.108           | 0.064           | 0.507           | 0.000           | 0.034          | 0.140           | 0.000           | 0.043           | 0.018           | 0.000           | 1.013          |
| 2980           | 5880            | 0.000          | 0913           | 0.076           | 0.000           | 0.686           | 0.000           | 0.067          | 0.264           | 0.000           | 0.028           | 0.035           | 0.000           | 0.200          |
| 0345           | 7799            | 0.000          | 2187           | 0.116           | 0.000           | 0.719           | 0.000           | 0.085          | 0.766           | 0.000           | 0.065           | 0.000           | 0.000           | 0.152          |
| 1803           | 5728            | 0.000          | 12471          | 0.210           | 0.347           | 0.867           | 0.000           | 0.020          | 0.277           | 0.000           | 0.052           | 0.000           | 0.071           | 0.000          |
| 3247           | 8429            | 0.000          | 0988           | 0.106           | 0.000           | 0.169           | 0.000           | 0.116          | 0.294           | 0.000           | 0.010           | 0.000           | 0.000           | 0.000          |
| 0217           | 15868           | 0.000          | 0548           | 0.000           | 0.000           | 0.550           | 0.000           | 0.086          | 0.532           | 0.000           | 0.109           | 0.045           | 0.000           | 0.759          |
| 5403           | 8730            | 0.000          | 0943           | 0.099           | 0.000           | 0.902           | 0.000           | 0.038          | 0.223           | 0.000           | 0.000           | 0.029           | 0.000           | 0.242          |
| 1948           | 7514            | 0.000          | 04             |                 |                 |                 |                 |                |                 |                 |                 |                 |                 |                |



| ENSG00000251286 | ENSG00000274764 | ENSG00000005844 | ENSG00000241088 | ENSG00000243824 | ENSG00000251296 |
|-----------------|-----------------|-----------------|-----------------|-----------------|-----------------|
| 0.000           | 0.000           | 2.654           | 0.090           | 0.596           | 0.000           |
| 0.000           | 0.000           | 0.735           | 0.115           | 0.887           | 0.000           |
| 0.000           | 0.000           | 1.681           | 0.000           | 1.354           | 0.000           |
| 0.000           | 0.000           | 1.675           | 0.000           | 0.511           | 0.000           |
| 0.000           | 0.000           | 5.962           | 0.215           | 0.427           | 0.000           |
| 0.000           | 0.000           | 9.767           | 0.034           | 0.637           | 0.000           |
| 0.000           | 0.000           | 10.089          | 0.191           | 0.843           | 0.000           |
| 0.000           | 0.000           | 3.453           | 0.000           | 0.535           | 0.000           |
| 0.000           | 0.000           | 1.420           | 0.093           | 0.928           | 0.000           |
| 0.000           | 0.000           | 5.415           | 0.543           | 1.500           | 0.000           |
| 0.000           | 0.000           | 1.801           | 0.134           | 0.408           | 0.000           |
| 0.000           | 0.000           | 6.125           | 0.000           | 0.878           | 0.000           |
| 0.000           | 0.000           | 2.830           | 0.036           | 0.709           | 0.000           |
| 0.000           | 0.000           | 3.290           | 0.033           | 0.442           | 0.000           |
| 0.000           | 0.000           | 2.576           | 0.297           | 1.313           | 0.000           |
| 0.000           | 0.000           | 12.673          | 0.033           | 0.405           | 0.000           |
| 0.000           | 0.000           | 1.142           | 0.038           | 0.255           | 0.000           |
| 0.000           | 0.000           | 1.429           | 0.137           | 0.807           | 0.000           |
| 0.000           | 0.000           | 2.340           | 0.035           | 0.883           | 0.000           |
| 0.000           | 0.000           | 1.564           | 0.000           | 0.205           | 0.000           |
| 0.000           | 0.000           | 1.108           | 0.040           | 0.744           | 0.000           |
| 0.000           | 0.000           | 1.208           | 0.000           | 0.352           | 0.000           |
| 0.000           | 0.000           | 2.167           | 0.120           | 0.751           | 0.000           |
| 0.000           | 0.000           | 1.930           | 0.170           | 0.827           | 0.000           |
| 0.000           | 0.000           | 4.037           | 0.152           | 0.377           | 0.000           |
| 0.000           | 0.000           | 3.635           | 0.000           | 0.305           | 0.000           |
| 0.000           | 0.000           | 2.561           | 0.045           | 1.063           | 0.000           |
| 0.000           | 0.000           | 1.281           | 0.000           | 0.867           | 0.000           |
| 0.000           | 0.000           | 1.671           | 0.039           | 0.432           | 0.035           |
| 0.000           | 0.000           | 0.865           | 0.079           | 1.216           | 0.000           |
| 0.000           | 0.000           | 1.457           | 0.129           | 0.429           | 0.000           |
| 0.000           | 0.000           | 1.322           | 0.203           | 0.599           | 0.000           |
| 0.000           | 0.000           | 3.528           | 0.000           | 0.653           | 0.000           |
| 0.000           | 0.000           | 1.250           | 0.000           | 0.588           | 0.000           |
| 0.000           | 0.000           | 2.094           | 0.060           | 1.064           | 0.000           |
| 0.000           | 0.000           | 3.878           | 0.073           | 0.482           | 0.000           |
| 0.000           | 0.000           | 2.789           | 0.035           | 0.077           | 0.000           |
| 0.000           | 0.000           | 10.080          | 0.069           | 0.230           | 0.000           |
| 0.000           | 0.000           | 2.911           | 0.041           | 0.594           | 0.000           |
| 0.000           | 0.000           | 1.449           | 0.000           | 0.378           | 0.000           |
| 0.000           | 0.000           | 4.128           | 0.000           | 0.329           | 0.039           |
| 0.000           | 0.000           | 1.659           | 0.000           | 0.357           | 0.000           |
| 0.000           | 0.000           | 2.282           | 0.040           | 0.349           | 0.000           |
| 0.000           | 0.000           | 3.038           | 0.102           | 0.337           | 0.000           |
| 0.000           | 0.000           | 1.085           | 0.000           | 0.479           | 0.000           |
| 0.000           | 0.000           | 3.637           | 0.106           | 0.390           | 0.000           |
| 0.000           | 0.000           | 0.185           | 0.039           | 1.245           | 0.000           |
| 0.000           | 0.000           | 3.793           | 0.039           | 0.695           | 0.000           |
| 0.000           | 0.000           | 1.556           | 0.102           | 0.791           | 0.000           |
| 0.000           | 0.000           | 3.907           | 0.161           | 0.889           | 0.000           |
| 0.000           | 0.000           | 1.467           | 0.097           | 0.536           | 0.000           |
| 0.000           | 0.000           | 2.971           | 0.035           | 0.808           | 0.000           |
| 0.000           | 0.000           | 1.250           | 0.106           | 0.548           | 0.000           |
| 0.000           | 0.000           | 2.876           | 0.063           | 0.415           | 0.000           |
| 0.000           | 0.000           | 0.530           | 0.289           | 1.529           | 0.000           |
| 0.000           | 0.000           | 0.703           | 0.301           | 1.162           | 0.000           |
| 0.000           | 0.000           | 1.286           | 0.112           | 0.660           | 0.000           |
| 0.000           | 0.000           | 1.974           | 0.071           | 0.468           | 0.000           |
| 0.000           | 0.000           | 3.133           | 0.105           | 0.659           | 0.000           |
| 0.000           | 0.000           | 2.130           | 0.065           | 0.796           | 0.000           |
| 0.000           | 0.000           | 0.817           | 0.000           | 0.585           | 0.000           |
| 0.000           | 0.000           | 1.652           | 0.180           | 1.127           | 0.000           |
| 0.000           | 0.000           | 0.688           | 0.062           | 0.587           | 0.000           |
| 0.000           | 0.000           | 1.907           | 0.067           | 0.370           | 0.000           |
| 0.000           | 0.000           | 0.679           | 0.112           | 0.330           | 0.000           |
| 0.000           | 0.000           | 0.965           | 0.096           | 0.636           | 0.000           |
| 0.000           | 0.000           | 0.873           | 0.000           | 0.509           | 0.000           |
| 0.000           | 0.000           | 0.309           | 0.132           | 0.388           | 0.000           |
| 0.000           | 0.000           | 2.612           | 0.175           | 0.515           | 0.000           |
| 0.000           | 0.000           | 0.849           | 0.138           | 0.763           | 0.000           |
| 0.000           | 0.000           | 1.275           | 0.101           | 1.038           | 0.000           |
| 0.000           | 0.000           | 1.748           | 0.000           | 0.450           | 0.000           |
| 0.000           | 0.000           | 0.993           | 0.062           | 0.713           | 0.000           |
| 0.000           | 0.000           | 1.927           | 0.000           | 0.603           | 0.000           |
| 0.000           | 0.000           | 3.462           | 0.046           | 0.511           | 0.000           |
| 0.000           | 0.000           | 0.568           | 0.056           | 0.492           | 0.000           |
| 0.000           | 0.000           | 2.346           | 0.039           | 1.720           | 0.000           |
| 0.000           | 0.000           | 0.437           | 0.234           | 1.548           | 0.000           |
| 0.000           | 0.000           | 0.884           | 0.098           | 0.975           | 0.000           |
| 0.000           | 0.000           | 1.917           | 0.098           | 0.919           | 0.000           |
| 0.000           | 0.000           | 0.793           | 0.090           | 1.140           | 0.000           |
| 0.000           | 0.000           | 1.342           | 0.035           | 0.466           | 0.000           |
| 0.000           | 0.000           | 6.457           | 0.042           | 0.546           | 0.000           |
| 0.000           | 0.000           | 3.897           | 0.189           | 0.366           | 0.000           |
| 0.000           | 0.000           | 1.803           | 0.039           | 0.262           | 0.000           |
| 0.000           | 0.000           | 0.974           | 0.042           | 0.463           | 0.000           |
| 0.000           | 0.000           | 1.324           | 0.066           | 0.437           | 0.000           |
| 0.000           | 0.000           | 4.652           | 0.103           | 0.360           | 0.000           |
| 0.000           | 0.000           | 0.692           | 0.000           | 0.347           | 0.000           |
| 0.000           | 0.000           | 0.895           | 0.184           | 1.488           | 0.000           |
| 0.000           | 0.000           | 0.411           | 0.065           | 0.542           | 0.000           |
| 0.000           | 0.000           | 0.364           | 0.000           | 0.834           | 0.000           |
| 0.000           | 0.000           | 6.354           | 0.098           | 0.648           | 0.000           |
| 0.000           | 0.000           | 1.104           | 0.034           | 0.642           | 0.000           |
| 0.000           | 0.000           | 1.470           | 0.099           | 0.764           | 0.000           |
| 0.000           | 0.000           | 1.267           | 0.076           | 0.211           | 0.000           |
| 0.000           | 0.000           | 0.909           | 0.080           | 0.885           | 0.000           |
| 0.000           | 0.000           | 2.234           | 0.163           | 0.721           | 0.000           |
| 0.000           | 0.000           | 4.798           | 0.413           | 1.827           | 0.000           |
| 0.000           | 0.000           | 1.671           | 0.000           | 0.942           | 0.000           |
| 0.000           | 0.000           | 1.760           | 0.060           | 0.442           | 0.000           |
| 0.000           | 0.000           | 0.750           | 0.104           | 1.269           | 0.000           |
| 0.000           | 0.000           | 2.771           | 0.000           | 0.487           | 0.000           |
| 0.000           | 0.012           | 6.515           | 0.044           | 0.483           | 0.000           |
| 0.000           | 0.000           | 0.724           | 0.100           | 0.222           | 0.000           |
| 0.000           | 0.000           | 3.480           | 0.000           | 0.873           | 0.000           |
| 0.000           | 0.000           | 2.095           | 0.000           | 0.133           | 0.000           |
| 0.000           | 0.000           | 0.400           | 0.000           | 0.552           | 0.000           |
| 0.000           | 0.000           | 1.427           | 0.101           | 0.481           | 0.000           |
| 0.000           | 0.000           | 2.673           | 0.168           | 1.436           | 0.000           |
| 0.000           | 0.000           | 1.306           | 0.000           | 0.594           | 0.000           |
| 0.000           | 0.000           | 0.363           | 0.000           | 0.410           | 0.000           |
| 0.000           | 0.000           | 8.744           | 0.000           | 0.254           | 0.000           |
| 0.000           | 0.000           | 3.907           | 0.164           | 0.727           | 0.000           |
| 0.000           | 0.000           | 1.112           | 0.000           | 0.906           | 0.000           |
| 0.000           | 0.000           | 1.752           | 0.124           | 0.825           | 0.000           |
| 0.000           | 0.000           | 1.250           | 0.038           | 0.316           | 0.000           |
| 0.000           | 0.000           | 2.011           | 0.041           | 0.869           | 0.000           |
| 0.000           | 0.000           | 1.662           | 0.000           | 1.032           | 0.000           |
| 0.000           | 0.000           | 0.994           | 0.000           | 0.755           | 0.000           |
| 0.000           | 0.000           | 2.579           | 0.031           | 0.547           | 0.000           |
| 0.000           | 0.000           | 1.452           | 0.233           | 0.772           | 0.000           |
| 0.000           | 0.000           | 3.381           | 0.082           | 1.127           | 0.000           |
| 0.000           | 0.000           | 2.414           | 0.162           | 0.537           | 0.000           |
| 0.000           | 0.011           | 1.729           | 0.000           | 0.462           | 0.000           |
| 0.000           | 0.000           | 3.474           | 0.073           | 1.042           | 0.000           |
| 0.000           | 0.000           | 2.673           | 0.000           | 1.306           | 0.000           |
| 0.000           | 0.000           | 1.926           | 0.094           | 0.587           | 0.000           |
| 0.000           | 0.000           | 1.779           | 0.058           | 0.352           | 0.000           |
| 0.000           | 0.000           | 0.749           | 0.031           | 0.728           | 0.028           |
| 0.000           | 0.000           | 1.882           | 0.060           | 0.297           | 0.000           |
| 0.000           | 0.000           | 2.517           | 0.084           | 0.935           | 0.000           |
| 0.000           | 0.000           | 1.833           | 0.170           | 0.975           | 0.000           |
| 0.000           | 0.000           | 1.587           | 0.175           | 0.819           | 0.000           |
| 0.000           | 0.000           | 0.944           | 0.089           | 0.393           | 0.000           |
| 0.000           | 0.000           | 2.302           | 0.099           | 0.436           | 0.045           |
| 0.000           | 0.000           | 2.153           | 0.166           | 0.367           | 0.000           |
| 0.000           | 0.000           | 0.811           | 0.045           | 0.845           | 0.000           |
| 0.000           | 0.000           | 0.819           | 0.157           | 1.178           | 0.000           |
| 0.000           | 0.000           | 1.028           | 0.032           | 0.639           | 0.000           |
| 0.000           | 0.000           | 2.278           | 0.115           | 1.711           | 0.000           |
| 0.000           | 0.000           | 1.306           | 0.060           | 0.727           | 0.000           |
| 0.000           | 0.000           | 1.780           | 0.041           | 0.403           | 0.000           |
| 0.000           | 0.000           | 1.293           | 0.036           | 0.603           | 0.000           |
| 0.000           | 0.000           | 1.029           | 0.036           | 0.987           | 0.000           |

**Table S4.** Summary of the main features of Reboot and similar tools.

| <b>Tool</b>                              | <b>Reboot</b> | <b>HDMAC</b> | <b>Biospear</b> | <b>BhGLM</b> | <b>KM-Plotter</b> |
|------------------------------------------|---------------|--------------|-----------------|--------------|-------------------|
| <i>Penalized cox regression</i>          | YES           | YES          | YES             | YES          | NO                |
| <i>Bootstrap</i>                         | YES           | NO           | YES#            | NO           | NO                |
| <i>Web interface</i>                     | YES           | YES          | NO              | NO           | YES               |
| <i>Detailed Documentation</i>            | YES           | NO*          | YES             | NO*          | NO*               |
| <i>High-dimensional data</i>             | YES           | YES+         | YES             | YES          | NO                |
| <i>Evaluation of Clinical parameters</i> | YES           | YES          | NO              | NO           | YES               |
| <i>Pre-filtering</i>                     | YES           | NO           | NO              | NO           | NO~               |
| <i>Integrative approach</i>              | YES           | NO           | NO              | NO           | NO                |
| <i>Validation</i>                        | YES           | NO           | NO              | NO           | NO                |
| <i>Graphical Signature</i>               | YES           | NO           | YES             | YES          | NO                |
| <i>Graphical Survival Outcome</i>        | YES           | NO           | NO              | NO           | YES               |
| <i>Command line</i>                      | YES           | NO           | YES             | YES          | NO                |

(#) Biospear calculates expected survival using bootstrap, but does not attribute significance this way;  
 (\*) Detailed documentation available, including usage example, command features, explained parameters and installation guide is proposed. All tools provide some sort of usage guidance, yet maintain implicit some parameters and analysis steps; (+) HDMAC claims to perform high dimension analysis, but all attempts with more than 1000 genes returned errors; (~) KM-Plotter allows user to subset the raw datasets available in order to perform further analysis.

**Table S5.** Protein-coding genes up-regulated in glioblastoma in comparison to low-grade glioma patients (log2FoldChange  $\geq 2$  and FDR adjusted p-value  $< 0.05$ ).

| gene.symbol | log2FoldChange | FDR       |
|-------------|----------------|-----------|
| HOXC13      | 8.31267        | 3.08E-187 |
| HOXC11      | 8.16204        | 6.40E-194 |
| SAA1        | 8.13785        | 2.19E-160 |
| PLA2G2A     | 7.69151        | 2.85E-129 |
| HOXD13      | 7.62622        | 8.26E-188 |
| SFT2D3      | 7.56194        | 9.28E-11  |
| PRAC2       | 6.91535        | 2.78E-108 |
| HOXD11      | 6.84318        | 3.23E-112 |
| PI3         | 6.82494        | 8.89E-146 |
| HOXB8       | 6.76164        | 5.14E-115 |
| DAZ2        | 6.30930        | 1.50E-15  |
| SAA2-SAA4   | 6.10032        | 3.03E-76  |
| LBX1        | 5.97443        | 5.57E-91  |
| PITX2       | 5.93513        | 3.38E-117 |
| OTP         | 5.90006        | 1.60E-135 |
| POSTN       | 5.89122        | 1.88E-104 |
| SAA2        | 5.88792        | 5.68E-210 |
| C5orf46     | 5.73150        | 5.73E-78  |
| C6orf15     | 5.69659        | 9.17E-42  |
| NKX2-5      | 5.64422        | 3.07E-139 |
| MMP9        | 5.57707        | 4.99E-172 |
| CCL7        | 5.55751        | 1.23E-60  |
| CA3         | 5.54211        | 4.34E-230 |
| HOXD10      | 5.52211        | 5.91E-113 |
| IBSP        | 5.51025        | 7.14E-85  |
| HOXC8       | 5.50481        | 3.11E-97  |
| CHI3L1      | 5.49907        | 2.74E-113 |
| HOXC10      | 5.43846        | 5.37E-67  |
| HOXC9       | 5.41247        | 3.78E-75  |
| KRT75       | 5.38595        | 1.66E-92  |
| AL445238.1  | 5.38364        | 2.06E-69  |
| CAPN6       | 5.36698        | 4.60E-126 |
| HOXB9       | 5.36390        | 2.92E-124 |
| NNMT        | 5.34006        | 1.39E-224 |
| CD70        | 5.32724        | 5.51E-151 |
| IL36B       | 5.27517        | 2.13E-54  |
| VGLL2       | 5.25022        | 9.48E-109 |
| HIST1H3F    | 5.17573        | 8.89E-66  |
| GATA4       | 5.14183        | 1.93E-78  |
| DAZ4        | 5.10323        | 1.59E-30  |
| FMOD        | 5.09929        | 5.24E-212 |
| HOXB3       | 5.05409        | 5.72E-129 |

|           |         |           |
|-----------|---------|-----------|
| HOXA5     | 5.04195 | 5.70E-90  |
| HOXD12    | 5.01753 | 1.61E-88  |
| PRDM13    | 5.00345 | 2.14E-54  |
| UNCX      | 4.97530 | 4.57E-30  |
| HOXB13    | 4.95180 | 5.31E-141 |
| IGFBP2    | 4.86835 | 3.23E-264 |
| SCNN1B    | 4.85387 | 1.56E-127 |
| HOXA9     | 4.85242 | 8.56E-72  |
| SHOX2     | 4.85171 | 1.08E-106 |
| MEOX2     | 4.84083 | 1.94E-115 |
| LTF       | 4.82009 | 3.87E-60  |
| CHRNA9    | 4.79487 | 9.24E-115 |
| PTX3      | 4.78183 | 5.50E-230 |
| STOML3    | 4.77738 | 4.67E-51  |
| HOXA6     | 4.77692 | 3.28E-104 |
| OR51E1    | 4.75088 | 3.80E-150 |
| MCEMP1    | 4.73554 | 2.94E-98  |
| COL3A1    | 4.70929 | 2.41E-154 |
| HIST1H2BH | 4.70528 | 8.58E-194 |
| COL1A1    | 4.70070 | 3.27E-133 |
| HOXA4     | 4.66575 | 2.45E-50  |
| HOXC6     | 4.65932 | 1.04E-82  |
| IGF2BP3   | 4.65073 | 8.34E-298 |
| HOXA3     | 4.64331 | 1.13E-51  |
| GALNT5    | 4.64184 | 3.99E-136 |
| HOXA2     | 4.64103 | 2.48E-50  |
| SEC61G    | 4.63731 | 2.87E-252 |
| CCDC140   | 4.59655 | 1.28E-32  |
| EN1       | 4.57932 | 5.85E-84  |
| CA9       | 4.57170 | 3.60E-134 |
| COL6A2    | 4.55410 | 1.02E-232 |
| HOXB4     | 4.53749 | 3.55E-84  |
| MYBPH     | 4.52562 | 3.95E-151 |
| SIX6      | 4.52395 | 4.90E-39  |
| LRRC15    | 4.52202 | 2.30E-87  |
| LIF       | 4.51518 | 1.21E-172 |
| HIST1H3B  | 4.47404 | 5.24E-96  |
| CXCL8     | 4.46174 | 2.38E-102 |
| IL2RA     | 4.44521 | 3.48E-133 |
| POTEE     | 4.42879 | 4.57E-123 |
| CXCL10    | 4.41041 | 3.10E-120 |
| COL1A2    | 4.40471 | 1.32E-182 |
| TREM1     | 4.39183 | 3.49E-106 |
| HOXB5     | 4.38818 | 1.83E-50  |
| LOX       | 4.37588 | 5.33E-227 |
| MMP7      | 4.37513 | 8.59E-75  |

|            |         |           |
|------------|---------|-----------|
| HIST1H1B   | 4.37354 | 4.47E-87  |
| TIMP1      | 4.37282 | 1.39E-144 |
| HOXB2      | 4.34426 | 1.11E-116 |
| COL6A3     | 4.29016 | 1.59E-135 |
| CXCL6      | 4.28692 | 4.82E-87  |
| OTOR       | 4.28107 | 3.99E-39  |
| MMP13      | 4.27360 | 3.16E-99  |
| MMP12      | 4.26752 | 1.52E-41  |
| MAB21L2    | 4.24710 | 1.09E-54  |
| PPDPFL     | 4.23814 | 1.14E-78  |
| SLAMF9     | 4.23810 | 9.47E-162 |
| AC008763.3 | 4.22549 | 3.82E-13  |
| CAMP       | 4.22269 | 5.05E-50  |
| CNPY1      | 4.22252 | 4.75E-130 |
| HP         | 4.19105 | 7.19E-122 |
| MAGEC2     | 4.18327 | 3.90E-51  |
| HIST1H3G   | 4.17711 | 5.96E-107 |
| IDO1       | 4.14817 | 4.43E-67  |
| HIST1H2AJ  | 4.13446 | 2.27E-54  |
| C15orf48   | 4.13266 | 1.29E-187 |
| WISP1      | 4.12861 | 5.87E-119 |
| TNFAIP6    | 4.12564 | 3.16E-201 |
| GDF15      | 4.12411 | 2.10E-149 |
| LUM        | 4.10820 | 9.17E-144 |
| CHRNA1     | 4.10693 | 9.09E-88  |
| ZNF679     | 4.10616 | 1.84E-25  |
| HOXA7      | 4.10495 | 5.03E-45  |
| PDPN       | 4.10011 | 7.54E-158 |
| MFAP2      | 4.08419 | 7.97E-114 |
| BPIFB4     | 4.03207 | 1.53E-53  |
| CTHRC1     | 4.03075 | 3.12E-172 |
| IGF2BP2    | 4.02947 | 1.69E-147 |
| ABCC3      | 4.01352 | 1.09E-104 |
| RETN       | 3.99422 | 1.13E-60  |
| STC1       | 3.99277 | 5.78E-145 |
| MMP8       | 3.97893 | 2.54E-49  |
| PNLIPRP3   | 3.97298 | 2.57E-47  |
| AC112229.3 | 3.96238 | 3.59E-21  |
| MSMP       | 3.95505 | 1.37E-70  |
| PHLDA2     | 3.94588 | 3.55E-137 |
| ADAM12     | 3.94557 | 2.99E-221 |
| DAZ1       | 3.94499 | 8.11E-30  |
| CCL23      | 3.94346 | 6.43E-55  |
| FOXB1      | 3.91604 | 6.45E-57  |
| COL5A1     | 3.89977 | 7.87E-132 |
| ESM1       | 3.88452 | 8.79E-77  |

|            |         |           |
|------------|---------|-----------|
| DEPDC1     | 3.88330 | 1.22E-227 |
| OTX2       | 3.88197 | 2.26E-23  |
| FOXA2      | 3.87297 | 4.80E-31  |
| IL13RA2    | 3.86368 | 6.83E-82  |
| MYBL2      | 3.85369 | 2.84E-161 |
| CLEC5A     | 3.84107 | 4.89E-92  |
| PRAME      | 3.83463 | 1.05E-85  |
| PCOLCE     | 3.82779 | 4.31E-221 |
| CYP27B1    | 3.82291 | 1.19E-153 |
| DMRTA2     | 3.81083 | 1.56E-80  |
| SRY        | 3.80632 | 6.56E-24  |
| PITX1      | 3.79025 | 1.69E-96  |
| CXCL11     | 3.78613 | 7.99E-92  |
| FGF19      | 3.78566 | 2.78E-20  |
| EDN2       | 3.78282 | 7.19E-63  |
| SERPINE1   | 3.76472 | 1.95E-94  |
| F13A1      | 3.76418 | 1.27E-91  |
| VEGFA      | 3.73759 | 3.94E-241 |
| EPYC       | 3.73653 | 9.47E-22  |
| CD1A       | 3.73571 | 6.86E-36  |
| FAM183A    | 3.73164 | 4.66E-48  |
| PLEK2      | 3.72202 | 3.90E-193 |
| DPEP1      | 3.72172 | 6.39E-88  |
| HIST1H3I   | 3.72076 | 7.33E-39  |
| DPP4       | 3.70556 | 3.75E-174 |
| EMP3       | 3.70284 | 1.66E-119 |
| MMP1       | 3.67176 | 2.99E-40  |
| METTL7B    | 3.66914 | 1.05E-90  |
| ADM        | 3.66113 | 6.95E-140 |
| HIST1H1D   | 3.65837 | 5.21E-83  |
| HIST1H2BI  | 3.65674 | 2.11E-40  |
| GPX8       | 3.64202 | 1.23E-140 |
| HOXA1      | 3.63780 | 3.62E-92  |
| FGF3       | 3.63624 | 3.85E-12  |
| CHI3L2     | 3.63058 | 8.44E-71  |
| CTAGE6     | 3.61969 | 2.84E-26  |
| CENPA      | 3.61937 | 6.76E-222 |
| PDX1       | 3.61821 | 7.22E-28  |
| AC087632.1 | 3.61225 | 1.76E-140 |
| CWH43      | 3.61087 | 2.03E-33  |
| AC034102.2 | 3.60830 | 4.20E-06  |
| KDEL3      | 3.60552 | 3.14E-207 |
| FCGR2B     | 3.60222 | 1.49E-103 |
| APCDD1L    | 3.59324 | 2.88E-33  |
| GABRR1     | 3.58574 | 8.55E-65  |
| OCIAD2     | 3.58269 | 3.42E-162 |

|           |         |           |
|-----------|---------|-----------|
| FABP5     | 3.58203 | 4.68E-127 |
| HMGA2     | 3.57920 | 7.02E-128 |
| S100A4    | 3.57121 | 3.00E-146 |
| CSF2      | 3.56857 | 7.58E-22  |
| GDF3      | 3.56562 | 6.13E-26  |
| BIRC5     | 3.56028 | 2.58E-160 |
| FAM92B    | 3.54097 | 9.71E-68  |
| COL4A1    | 3.53991 | 1.10E-156 |
| CDC20     | 3.53576 | 1.21E-210 |
| HCAR3     | 3.53297 | 4.81E-48  |
| RARRES2   | 3.52997 | 5.85E-92  |
| ALPK2     | 3.52943 | 3.48E-104 |
| HIST1H2BM | 3.51533 | 1.33E-38  |
| WT1       | 3.50449 | 8.84E-52  |
| G0S2      | 3.49811 | 5.31E-81  |
| UBE2C     | 3.49210 | 4.00E-140 |
| MARCO     | 3.49000 | 1.21E-64  |
| DLGAP5    | 3.48997 | 1.38E-139 |
| HIST1H2AI | 3.48885 | 1.68E-62  |
| RRM2      | 3.47267 | 1.24E-172 |
| POTEF     | 3.46244 | 1.08E-109 |
| CD248     | 3.45935 | 1.41E-195 |
| ISL2      | 3.45615 | 9.01E-81  |
| CHODL     | 3.45227 | 5.19E-106 |
| HOXB7     | 3.45190 | 5.45E-102 |
| HOXD9     | 3.43918 | 2.01E-42  |
| AQP9      | 3.43349 | 9.58E-81  |
| GPR1      | 3.43316 | 8.35E-126 |
| TNFRSF12A | 3.41921 | 2.81E-131 |
| CCL11     | 3.41504 | 3.96E-09  |
| SPOCD1    | 3.41244 | 8.44E-77  |
| GSX2      | 3.40634 | 2.12E-54  |
| BMP5      | 3.40442 | 3.23E-48  |
| CCL20     | 3.40000 | 1.46E-131 |
| AREG      | 3.39823 | 9.88E-45  |
| FBXO39    | 3.39530 | 1.31E-90  |
| HGD       | 3.39372 | 1.67E-103 |
| LIPN      | 3.37537 | 9.90E-42  |
| DLK1      | 3.37386 | 1.33E-33  |
| MAGEA3    | 3.37253 | 1.63E-26  |
| GPR139    | 3.36918 | 2.47E-30  |
| E2F7      | 3.36415 | 2.63E-182 |
| KIF20A    | 3.36151 | 3.63E-147 |
| IL36RN    | 3.35487 | 1.61E-21  |
| AGR3      | 3.34241 | 2.06E-28  |
| S100A9    | 3.33271 | 2.52E-88  |

|            |         |           |
|------------|---------|-----------|
| ASF1B      | 3.32919 | 5.68E-207 |
| STAC       | 3.32627 | 1.26E-57  |
| SRPX2      | 3.32234 | 1.41E-102 |
| GAGE2E     | 3.31842 | 1.48E-34  |
| CCNB2      | 3.31678 | 8.65E-173 |
| C22orf42   | 3.29918 | 1.06E-85  |
| HIST1H2AL  | 3.28266 | 7.01E-55  |
| NOS2       | 3.27858 | 4.52E-82  |
| HOXC12     | 3.27584 | 4.79E-11  |
| MELK       | 3.27484 | 1.38E-165 |
| TFPI2      | 3.27421 | 8.54E-75  |
| KRT32      | 3.27132 | 2.08E-22  |
| MS4A6E     | 3.26665 | 1.89E-41  |
| MCUB       | 3.26479 | 1.34E-233 |
| TFAP2B     | 3.25599 | 5.20E-22  |
| COL5A2     | 3.25431 | 3.37E-174 |
| REG1B      | 3.25232 | 1.20E-15  |
| VSTM1      | 3.25104 | 3.12E-58  |
| HTRA3      | 3.24488 | 1.05E-140 |
| MMP11      | 3.24321 | 1.61E-152 |
| CDCA8      | 3.23189 | 1.19E-221 |
| CD163      | 3.23152 | 2.10E-81  |
| AC012531.2 | 3.23110 | 5.40E-18  |
| HOXB6      | 3.22628 | 1.83E-59  |
| CCL18      | 3.22468 | 2.76E-32  |
| AL645922.1 | 3.22120 | 3.54E-23  |
| S100A8     | 3.20032 | 1.52E-73  |
| PIMREG     | 3.19631 | 6.47E-122 |
| MUC3A      | 3.19618 | 2.14E-93  |
| TDO2       | 3.19382 | 2.70E-95  |
| TEX101     | 3.19208 | 1.67E-134 |
| CSAG3      | 3.18806 | 4.75E-44  |
| HOXA10     | 3.18082 | 7.65E-30  |
| HIST1H3C   | 3.17957 | 7.17E-68  |
| HMX3       | 3.17887 | 2.30E-14  |
| PTTG1      | 3.17766 | 1.64E-232 |
| HOXC5      | 3.17685 | 5.87E-23  |
| BARX1      | 3.17331 | 1.47E-44  |
| SPP1       | 3.17128 | 6.63E-119 |
| IFI30      | 3.16787 | 1.16E-138 |
| LOXL1      | 3.16310 | 6.89E-90  |
| LGALS3     | 3.15861 | 4.51E-127 |
| MAP1LC3C   | 3.15574 | 2.04E-112 |
| MMP19      | 3.15367 | 1.77E-75  |
| HIST1H2AH  | 3.15197 | 4.01E-44  |
| AP000781.2 | 3.15159 | 1.64E-127 |

|            |         |           |
|------------|---------|-----------|
| COL4A2     | 3.14731 | 4.47E-158 |
| AURKB      | 3.14498 | 4.53E-121 |
| AC126283.2 | 3.14402 | 9.70E-78  |
| SPINK8     | 3.14293 | 3.02E-154 |
| HCAR2      | 3.14142 | 4.47E-71  |
| NEIL3      | 3.14096 | 2.67E-152 |
| TROAP      | 3.14062 | 9.49E-149 |
| ANXA1      | 3.13932 | 4.91E-88  |
| GAS2L3     | 3.13877 | 2.08E-247 |
| ANXA2      | 3.13503 | 2.10E-148 |
| SCNN1G     | 3.13414 | 5.53E-98  |
| SDC1       | 3.13168 | 1.77E-153 |
| CDK4       | 3.12724 | 2.21E-112 |
| PLP2       | 3.12182 | 5.25E-165 |
| ZAR1       | 3.11965 | 3.17E-56  |
| PLAT       | 3.11622 | 1.42E-208 |
| CPXCR1     | 3.11598 | 2.93E-12  |
| ENTHD1     | 3.10856 | 1.91E-45  |
| TMEM270    | 3.10485 | 2.30E-45  |
| ARL14EPL   | 3.10440 | 6.10E-34  |
| CDCA2      | 3.10356 | 8.23E-159 |
| AGTR1      | 3.09990 | 1.52E-105 |
| C6orf141   | 3.09204 | 6.95E-107 |
| ACOT12     | 3.08758 | 6.48E-83  |
| FAM20A     | 3.07745 | 6.23E-120 |
| HMX2       | 3.07492 | 1.51E-13  |
| TUBA1C     | 3.07043 | 7.12E-231 |
| STEAP3     | 3.06987 | 8.60E-134 |
| IGFBP3     | 3.06647 | 1.51E-87  |
| PDLIM4     | 3.05591 | 2.02E-69  |
| TAGLN2     | 3.05358 | 7.18E-212 |
| RFPL4A     | 3.04798 | 1.52E-10  |
| ADAMDEC1   | 3.04445 | 8.94E-34  |
| TBX20      | 3.04318 | 6.43E-09  |
| CDC25C     | 3.03855 | 2.34E-155 |
| PBK        | 3.03838 | 1.32E-106 |
| NODAL      | 3.03756 | 5.11E-133 |
| NOX4       | 3.03746 | 8.03E-253 |
| HAND2      | 3.03558 | 4.53E-26  |
| THBS1      | 3.03255 | 7.09E-74  |
| ERVV-1     | 3.03038 | 2.34E-25  |
| RARRES1    | 3.02715 | 1.40E-103 |
| IL1R2      | 3.02708 | 3.26E-69  |
| HJURP      | 3.01987 | 6.74E-163 |
| TNFRSF11B  | 3.01973 | 1.66E-96  |
| CEP55      | 3.01895 | 2.77E-160 |

|                 |         |           |
|-----------------|---------|-----------|
| COL8A1          | 3.01503 | 8.07E-68  |
| UCN2            | 3.01375 | 9.53E-68  |
| TMEM71          | 3.00767 | 7.05E-127 |
| TNFSF12-TNFSF13 | 3.00578 | 3.73E-31  |
| TTK             | 3.00551 | 7.54E-137 |
| RAB42           | 3.00275 | 2.76E-246 |
| SLPI            | 2.99449 | 3.24E-74  |
| CCL13           | 2.99268 | 5.14E-35  |
| HIST1H4A        | 2.99119 | 8.26E-36  |
| CLEC12A         | 2.99118 | 4.53E-64  |
| NAMPT           | 2.99074 | 2.91E-170 |
| CLCF1           | 2.98994 | 3.25E-97  |
| OTOS            | 2.98819 | 3.87E-43  |
| SPAG4           | 2.98705 | 8.38E-116 |
| NEK2            | 2.98337 | 6.99E-158 |
| CXCL9           | 2.98272 | 1.60E-58  |
| BDKRB2          | 2.98170 | 7.80E-75  |
| KIF2C           | 2.98108 | 1.42E-159 |
| CDC45           | 2.97576 | 3.96E-145 |
| CCNB1           | 2.97485 | 6.83E-303 |
| EYA4            | 2.97483 | 1.17E-53  |
| ESPNL           | 2.97180 | 8.25E-66  |
| CER1            | 2.97099 | 1.04E-46  |
| PLAU            | 2.96551 | 4.16E-85  |
| EBF3            | 2.96542 | 3.86E-59  |
| CXCL13          | 2.96330 | 2.17E-36  |
| IL6             | 2.95598 | 2.65E-51  |
| SPON2           | 2.95531 | 1.88E-94  |
| VWDE            | 2.95280 | 1.54E-44  |
| TWIST1          | 2.95144 | 2.21E-127 |
| CDKN3           | 2.95005 | 1.92E-235 |
| RBP1            | 2.94505 | 2.99E-79  |
| SP8             | 2.93905 | 1.64E-35  |
| PLSCR2          | 2.93784 | 2.43E-60  |
| SSX1            | 2.93320 | 1.08E-42  |
| SOCS2           | 2.92906 | 3.69E-137 |
| AC005832.4      | 2.92849 | 4.12E-79  |
| MSR1            | 2.92786 | 1.84E-127 |
| TMEM114         | 2.92595 | 6.78E-42  |
| CLIC1           | 2.92533 | 5.62E-200 |
| GAL             | 2.92526 | 3.24E-53  |
| DMP1            | 2.92366 | 1.27E-70  |
| PGK2            | 2.92284 | 9.37E-36  |
| AC011455.2      | 2.92244 | 1.36E-07  |
| PAX3            | 2.92033 | 1.87E-36  |
| JCHAIN          | 2.91255 | 4.47E-39  |

|            |         |           |
|------------|---------|-----------|
| CCKAR      | 2.90941 | 6.96E-32  |
| KISS1R     | 2.90900 | 2.43E-40  |
| FEZF1      | 2.90891 | 1.95E-32  |
| NHLH1      | 2.90863 | 6.24E-74  |
| ULBP1      | 2.90785 | 7.05E-121 |
| HS3ST3B1   | 2.90559 | 2.23E-72  |
| TK1        | 2.90535 | 3.06E-205 |
| FAM83D     | 2.90144 | 3.06E-163 |
| PRRX2      | 2.90082 | 3.99E-51  |
| SERPINH1   | 2.89829 | 3.48E-196 |
| PLAUR      | 2.89559 | 1.67E-163 |
| MEDAG      | 2.89533 | 3.38E-53  |
| FBP2       | 2.89234 | 9.73E-13  |
| EXOC3L2    | 2.88407 | 1.38E-169 |
| FCGBP      | 2.88069 | 2.54E-71  |
| TGFBI      | 2.87424 | 3.99E-81  |
| KLHDC7A    | 2.87123 | 2.46E-28  |
| AC005258.1 | 2.86560 | 2.67E-04  |
| CSTA       | 2.86372 | 2.68E-64  |
| SERPINB7   | 2.86025 | 2.77E-20  |
| AC013470.2 | 2.85631 | 1.12E-63  |
| NKX3-2     | 2.85475 | 4.61E-56  |
| DEFA4      | 2.85471 | 2.61E-16  |
| SH2D4A     | 2.85141 | 1.54E-100 |
| LUZP6      | 2.85022 | 1.01E-20  |
| DKK1       | 2.84811 | 3.04E-39  |
| CCNA2      | 2.84567 | 8.63E-207 |
| FCN3       | 2.84351 | 1.38E-99  |
| STAP1      | 2.84251 | 3.56E-61  |
| GJB2       | 2.84064 | 9.39E-48  |
| KIF4A      | 2.83515 | 2.76E-170 |
| CENPK      | 2.83419 | 1.90E-229 |
| C20orf141  | 2.83234 | 3.93E-14  |
| TLX3       | 2.83175 | 9.45E-10  |
| SOCS3      | 2.83064 | 5.25E-59  |
| AL035460.1 | 2.83033 | 2.45E-05  |
| FEV        | 2.82849 | 6.59E-36  |
| NCAPG      | 2.82739 | 9.39E-128 |
| CSF3       | 2.82736 | 2.68E-29  |
| AL022318.4 | 2.82694 | 4.24E-09  |
| KIF23      | 2.82670 | 3.94E-150 |
| CENPU      | 2.82095 | 3.45E-137 |
| AC006486.1 | 2.82009 | 9.60E-17  |
| MOXD1      | 2.81113 | 3.26E-38  |
| PRL        | 2.80953 | 4.12E-15  |
| AQP5       | 2.80903 | 8.14E-37  |

|            |         |           |
|------------|---------|-----------|
| IGLL5      | 2.80566 | 8.80E-16  |
| TOP2A      | 2.80523 | 3.19E-79  |
| E2F8       | 2.80392 | 1.50E-136 |
| BUB1       | 2.80263 | 5.91E-145 |
| SERPINA3   | 2.80235 | 2.10E-50  |
| SAA4       | 2.79428 | 3.60E-30  |
| PKIB       | 2.79127 | 1.70E-79  |
| KRT80      | 2.78940 | 1.30E-64  |
| ADAM33     | 2.78804 | 3.34E-104 |
| DEPDC1B    | 2.78704 | 6.54E-174 |
| AL358472.7 | 2.78640 | 1.70E-05  |
| LSP1       | 2.78155 | 1.56E-110 |
| IL36G      | 2.78093 | 6.13E-36  |
| DPYD       | 2.78023 | 9.50E-175 |
| MAGEC1     | 2.77922 | 8.38E-25  |
| NDC80      | 2.77119 | 1.27E-142 |
| ANPEP      | 2.77055 | 1.98E-134 |
| HIST2H2AC  | 2.77044 | 6.10E-112 |
| TBX1       | 2.76967 | 8.52E-79  |
| ULBP3      | 2.76828 | 5.57E-82  |
| FPR2       | 2.76637 | 5.34E-86  |
| RTL3       | 2.76560 | 2.19E-18  |
| SIM1       | 2.76314 | 5.47E-39  |
| RNASE2     | 2.76179 | 1.26E-66  |
| DMBX1      | 2.76020 | 9.42E-98  |
| GAGE13     | 2.75676 | 7.76E-10  |
| HOXC4      | 2.75588 | 4.02E-84  |
| CLEC18B    | 2.75576 | 4.51E-94  |
| NSUN7      | 2.75556 | 7.78E-128 |
| IL31RA     | 2.74420 | 1.28E-40  |
| PDLIM1     | 2.74205 | 2.10E-104 |
| BCAT1      | 2.74140 | 3.49E-137 |
| NPPB       | 2.73875 | 4.50E-56  |
| AFP        | 2.73698 | 3.66E-26  |
| EXO1       | 2.73183 | 2.80E-153 |
| ERVV-2     | 2.72948 | 3.41E-09  |
| PPY        | 2.72794 | 5.47E-31  |
| PRF1       | 2.72776 | 6.07E-90  |
| FNDC11     | 2.72709 | 5.76E-75  |
| VDR        | 2.72437 | 2.63E-94  |
| LILRA5     | 2.72424 | 2.80E-97  |
| MAGEA1     | 2.71754 | 2.61E-10  |
| MXRA5      | 2.70976 | 2.18E-70  |
| AOX1       | 2.70798 | 6.97E-97  |
| SERPINA1   | 2.70632 | 8.36E-93  |
| LAMB1      | 2.70624 | 2.98E-123 |

|            |         |           |
|------------|---------|-----------|
| IQGAP3     | 2.70349 | 8.80E-127 |
| EEF1AKMT3  | 2.70342 | 6.98E-102 |
| DES        | 2.70270 | 1.32E-34  |
| PXDNL      | 2.70229 | 2.52E-107 |
| CDK1       | 2.69642 | 4.71E-123 |
| C1orf158   | 2.69328 | 5.59E-47  |
| CAVIN3     | 2.69306 | 2.39E-117 |
| MAP3K7CL   | 2.69097 | 1.01E-107 |
| SKA3       | 2.68891 | 3.66E-130 |
| AC005943.1 | 2.68079 | 3.52E-51  |
| RHOD       | 2.68044 | 2.45E-59  |
| SGO1       | 2.67913 | 1.02E-142 |
| TYMS       | 2.67847 | 1.38E-170 |
| HBG1       | 2.67739 | 4.18E-46  |
| HK3        | 2.67483 | 1.15E-124 |
| SKA1       | 2.67296 | 1.51E-216 |
| ICOS       | 2.66881 | 8.10E-44  |
| EVC2       | 2.66770 | 9.37E-87  |
| ADGRE3     | 2.66744 | 4.53E-43  |
| HBE1       | 2.66385 | 2.28E-110 |
| SMIM3      | 2.66343 | 2.28E-161 |
| DEFA1      | 2.66136 | 3.12E-23  |
| NUF2       | 2.66056 | 2.20E-165 |
| SNAI2      | 2.65949 | 1.24E-95  |
| S100A11    | 2.65905 | 1.08E-130 |
| ASPM       | 2.65809 | 5.19E-85  |
| HNRNPCL2   | 2.65793 | 2.48E-26  |
| KLF14      | 2.65763 | 1.65E-10  |
| RDM1       | 2.65692 | 3.10E-123 |
| HIST1H4L   | 2.65449 | 4.53E-07  |
| C7orf57    | 2.65124 | 3.78E-34  |
| HIST1H2BO  | 2.65082 | 2.79E-61  |
| CYP19A1    | 2.65023 | 1.44E-80  |
| PTPN22     | 2.64361 | 3.94E-146 |
| FBLIM1     | 2.64318 | 7.42E-148 |
| CASP4      | 2.64087 | 1.27E-190 |
| C9orf135   | 2.64072 | 6.79E-52  |
| RAB34      | 2.64055 | 4.34E-107 |
| APOL4      | 2.64051 | 3.26E-100 |
| CARD16     | 2.63928 | 4.42E-117 |
| CCDC182    | 2.63765 | 2.58E-53  |
| CKAP2L     | 2.63465 | 2.21E-117 |
| HPD        | 2.63395 | 1.61E-49  |
| ORC1       | 2.63132 | 6.11E-174 |
| NUSAP1     | 2.63052 | 2.79E-118 |
| DPT        | 2.62831 | 2.52E-31  |

|            |         |           |
|------------|---------|-----------|
| KIF18A     | 2.62758 | 3.14E-165 |
| AC023055.1 | 2.62738 | 2.22E-129 |
| OIP5       | 2.62494 | 1.76E-207 |
| CPA4       | 2.62473 | 2.64E-117 |
| OLIG3      | 2.61996 | 4.25E-07  |
| STEAP1     | 2.61983 | 1.21E-75  |
| SECTM1     | 2.61841 | 5.68E-81  |
| PIGY       | 2.60614 | 3.34E-21  |
| VAV3       | 2.60037 | 1.80E-72  |
| CLRN1      | 2.59911 | 5.10E-41  |
| CFAP45     | 2.59597 | 1.69E-51  |
| ALX1       | 2.59447 | 3.48E-22  |
| TCTEX1D1   | 2.59354 | 3.04E-36  |
| MROH9      | 2.59071 | 1.28E-21  |
| MMP3       | 2.59050 | 9.43E-28  |
| SPRY1      | 2.59038 | 1.97E-132 |
| HIST1H2AM  | 2.58998 | 8.20E-65  |
| CATSPER1   | 2.58966 | 1.78E-82  |
| HASPIN     | 2.58936 | 2.27E-122 |
| DDIT4L     | 2.58867 | 2.21E-35  |
| APOBEC3B   | 2.58781 | 1.13E-119 |
| TPX2       | 2.58633 | 1.13E-130 |
| HIST1H3J   | 2.58595 | 6.35E-39  |
| PLA2G5     | 2.58554 | 7.41E-44  |
| CD2        | 2.58418 | 4.80E-58  |
| MARCH9     | 2.58271 | 6.92E-83  |
| SH2D2A     | 2.58125 | 3.87E-93  |
| ASPN       | 2.58087 | 2.14E-78  |
| FOSL1      | 2.58045 | 4.41E-70  |
| C1orf189   | 2.58005 | 2.83E-41  |
| SLC18A3    | 2.57951 | 3.31E-18  |
| FMO1       | 2.57939 | 4.41E-59  |
| PRG2       | 2.57719 | 1.37E-27  |
| NCAPH      | 2.57663 | 1.00E-133 |
| LOXL2      | 2.57648 | 1.14E-89  |
| PRR33      | 2.57603 | 5.19E-65  |
| DEFA3      | 2.57599 | 6.66E-13  |
| SPTA1      | 2.57547 | 8.09E-38  |
| HIST1H2BJ  | 2.57387 | 1.00E-112 |
| ALOX5AP    | 2.57229 | 1.13E-94  |
| C11orf88   | 2.57121 | 1.37E-46  |
| TRPM8      | 2.56881 | 3.66E-53  |
| TMPRSS7    | 2.56679 | 5.72E-38  |
| GBP5       | 2.56601 | 5.70E-84  |
| CDC6       | 2.56024 | 3.43E-203 |
| FOXM1      | 2.55909 | 1.92E-113 |

|            |         |           |
|------------|---------|-----------|
| AL603832.3 | 2.55731 | 9.95E-138 |
| ERCC6L     | 2.55683 | 4.13E-171 |
| SOCS1      | 2.55639 | 1.53E-105 |
| CKS2       | 2.55632 | 3.61E-213 |
| MYO1G      | 2.55441 | 1.14E-109 |
| SOST       | 2.55373 | 1.63E-25  |
| METTL1     | 2.54726 | 3.15E-112 |
| HIST1H3H   | 2.54264 | 2.32E-85  |
| CHRD2L     | 2.54069 | 2.41E-54  |
| LIMS4      | 2.53898 | 7.71E-65  |
| CDKN2C     | 2.53647 | 1.79E-135 |
| CISH       | 2.53636 | 9.52E-101 |
| ANGPT2     | 2.53563 | 9.13E-101 |
| MDK        | 2.53504 | 5.77E-135 |
| PHOX2B     | 2.53496 | 3.13E-09  |
| TEAD2      | 2.53464 | 9.52E-163 |
| PINLYP     | 2.53441 | 1.24E-118 |
| TRIM48     | 2.53384 | 1.52E-07  |
| TERT       | 2.53279 | 1.84E-25  |
| NKX2-1     | 2.53060 | 7.46E-25  |
| CD3D       | 2.52984 | 2.55E-54  |
| CHST4      | 2.52965 | 4.83E-32  |
| XCR1       | 2.52854 | 1.15E-43  |
| SLN        | 2.52790 | 9.97E-30  |
| LGALS1     | 2.52687 | 3.89E-132 |
| CCR2       | 2.52668 | 3.53E-41  |
| AC020909.1 | 2.52564 | 1.63E-06  |
| C1orf232   | 2.52543 | 2.32E-19  |
| KLHDC8A    | 2.52367 | 6.06E-118 |
| SLC43A3    | 2.51848 | 7.77E-165 |
| CD58       | 2.51767 | 1.26E-162 |
| RAD51      | 2.51546 | 2.33E-176 |
| ITGB3      | 2.51249 | 2.90E-77  |
| HILPDA     | 2.51114 | 1.15E-143 |
| CD48       | 2.50955 | 5.19E-54  |
| DIRAS3     | 2.50895 | 4.24E-72  |
| IL1RAP     | 2.50863 | 9.67E-121 |
| ITGA5      | 2.50712 | 6.00E-147 |
| SEMA3F     | 2.50269 | 1.67E-135 |
| HIST1H2AB  | 2.50261 | 1.16E-37  |
| AURKA      | 2.49800 | 2.91E-253 |
| HMMR       | 2.49652 | 2.84E-111 |
| SLC7A3     | 2.49092 | 3.97E-44  |
| ROPN1L     | 2.49015 | 2.85E-44  |
| DEFA1B     | 2.49015 | 1.37E-02  |
| MEST       | 2.48923 | 2.49E-140 |

|            |         |           |
|------------|---------|-----------|
| LYZ        | 2.48897 | 1.74E-46  |
| SLAMF1     | 2.48556 | 1.11E-50  |
| CATSPERD   | 2.48535 | 6.43E-38  |
| SPC24      | 2.48126 | 1.27E-147 |
| GTSE1      | 2.48000 | 1.02E-128 |
| KIAA0040   | 2.47858 | 2.33E-105 |
| SLAMF8     | 2.47799 | 4.12E-56  |
| CFB        | 2.47735 | 1.60E-90  |
| CD52       | 2.47705 | 7.40E-70  |
| TSPAN31    | 2.47516 | 1.54E-84  |
| ADAMTS3    | 2.47420 | 3.25E-61  |
| RAB32      | 2.47344 | 1.46E-137 |
| GBP1       | 2.47273 | 5.40E-88  |
| GZMA       | 2.47115 | 2.53E-48  |
| TEAD3      | 2.46559 | 1.80E-136 |
| PAGE5      | 2.46268 | 2.15E-15  |
| FAM3D      | 2.46243 | 2.72E-65  |
| FABP7      | 2.46208 | 2.60E-76  |
| APOBEC4    | 2.46093 | 1.37E-13  |
| RAD54L     | 2.45746 | 3.21E-147 |
| CXCR3      | 2.45670 | 7.39E-41  |
| DSG2       | 2.45606 | 1.56E-31  |
| SBK2       | 2.45533 | 7.23E-17  |
| HIST1H4B   | 2.45517 | 1.55E-25  |
| CYTL1      | 2.45358 | 1.36E-91  |
| FN1        | 2.45293 | 6.64E-119 |
| DTL        | 2.45050 | 1.37E-95  |
| GPR141     | 2.44857 | 1.52E-64  |
| SIT1       | 2.44796 | 2.07E-59  |
| PCLAF      | 2.44679 | 1.66E-168 |
| EMILIN3    | 2.44591 | 3.00E-32  |
| C2orf70    | 2.44443 | 4.20E-48  |
| AL645941.2 | 2.44260 | 1.28E-12  |
| TNFSF14    | 2.44175 | 3.29E-87  |
| SHCBP1     | 2.43853 | 1.29E-216 |
| BCL2A1     | 2.43839 | 9.97E-54  |
| PPIAL4D    | 2.43815 | 1.53E-16  |
| SERPINA5   | 2.43631 | 6.75E-25  |
| HMOX1      | 2.43547 | 4.72E-108 |
| PLIN2      | 2.43431 | 4.36E-161 |
| IL1RN      | 2.43334 | 2.61E-44  |
| TMPRSS15   | 2.43151 | 1.85E-31  |
| CD300E     | 2.43121 | 8.34E-102 |
| ENPEP      | 2.43077 | 5.39E-104 |
| SERINC2    | 2.42738 | 3.26E-81  |
| TRAT1      | 2.42682 | 5.75E-43  |

|            |         |           |
|------------|---------|-----------|
| CD80       | 2.42583 | 1.36E-61  |
| CEACAM16   | 2.42304 | 2.34E-14  |
| AC010422.5 | 2.42096 | 2.32E-08  |
| GPRC5A     | 2.41972 | 4.52E-65  |
| PDCD1LG2   | 2.41913 | 1.24E-80  |
| TCTEX1D4   | 2.41831 | 2.02E-35  |
| WNT16      | 2.41818 | 2.40E-32  |
| EDDM3A     | 2.41637 | 2.77E-11  |
| NKX6-1     | 2.41604 | 1.36E-77  |
| PMCH       | 2.41597 | 4.51E-17  |
| RDH10      | 2.41534 | 9.69E-117 |
| EVA1B      | 2.41046 | 1.77E-164 |
| UBE2T      | 2.41032 | 6.62E-158 |
| VNN2       | 2.40977 | 1.63E-78  |
| MND1       | 2.40908 | 8.54E-134 |
| RPS4Y2     | 2.40485 | 8.83E-25  |
| DLX5       | 2.40427 | 4.65E-33  |
| SERPING1   | 2.40339 | 2.89E-87  |
| EFEMP2     | 2.40241 | 8.81E-111 |
| IFNG       | 2.40238 | 2.43E-18  |
| EMILIN2    | 2.39860 | 3.45E-86  |
| AL451007.3 | 2.39833 | 1.93E-42  |
| GPR65      | 2.39767 | 4.66E-73  |
| LDHA       | 2.39369 | 7.80E-179 |
| ITGA4      | 2.39329 | 1.17E-90  |
| GRB14      | 2.39290 | 5.31E-52  |
| ZNF280A    | 2.39098 | 2.71E-17  |
| TSTD1      | 2.38752 | 5.42E-55  |
| ESPL1      | 2.38248 | 1.13E-106 |
| GATA3      | 2.38237 | 3.02E-40  |
| MMP14      | 2.38065 | 5.66E-103 |
| AC117378.1 | 2.37994 | 9.57E-38  |
| ESCO2      | 2.37790 | 7.39E-116 |
| ACTBL2     | 2.37482 | 4.35E-09  |
| BUB1B      | 2.37323 | 2.50E-93  |
| FAM111B    | 2.37212 | 4.18E-108 |
| ERP27      | 2.37203 | 1.78E-66  |
| ARSJ       | 2.37153 | 1.16E-76  |
| PARPBP     | 2.37063 | 0.00E+00  |
| MIA        | 2.37044 | 4.25E-31  |
| RGS16      | 2.37043 | 2.83E-80  |
| SLC16A3    | 2.36862 | 1.73E-130 |
| CENPE      | 2.36758 | 1.43E-111 |
| HIST1H2AD  | 2.36473 | 7.69E-22  |
| WEE1       | 2.36447 | 8.58E-142 |
| CALHM6     | 2.36244 | 4.44E-69  |

|              |         |           |
|--------------|---------|-----------|
| CSAG2        | 2.36185 | 1.07E-26  |
| FOXD2        | 2.36042 | 2.18E-76  |
| HIST1H4F     | 2.35887 | 9.71E-11  |
| MATN4        | 2.35541 | 2.51E-46  |
| WDR38        | 2.35473 | 6.36E-27  |
| HIST2H2AA3   | 2.35436 | 1.86E-24  |
| PLEKHN1      | 2.35426 | 1.42E-55  |
| ISL1         | 2.35193 | 2.87E-10  |
| MGP          | 2.35082 | 4.68E-38  |
| HSPA6        | 2.34394 | 1.23E-51  |
| DOK2         | 2.34040 | 9.31E-66  |
| SOD2         | 2.34035 | 4.50E-93  |
| FSTL1        | 2.33976 | 3.30E-154 |
| C7orf33      | 2.33954 | 7.83E-09  |
| CCL26        | 2.33315 | 4.00E-56  |
| SIRPG        | 2.33202 | 7.24E-60  |
| EGFR         | 2.33155 | 1.58E-55  |
| GPR31        | 2.33012 | 4.02E-28  |
| OSMR         | 2.32484 | 6.39E-98  |
| PMEL         | 2.32361 | 8.15E-110 |
| GNGT1        | 2.31678 | 1.03E-11  |
| HLA-DRA      | 2.31645 | 2.78E-60  |
| GJA3         | 2.31509 | 6.23E-27  |
| C2orf66      | 2.31485 | 1.03E-86  |
| KIFC1        | 2.31299 | 1.64E-80  |
| IL4I1        | 2.31246 | 1.20E-83  |
| MS4A6A       | 2.31195 | 2.57E-58  |
| LRRC9        | 2.31159 | 1.09E-30  |
| OSR2         | 2.30830 | 2.85E-21  |
| AC092143.1   | 2.30787 | 1.57E-21  |
| PLBD1        | 2.30715 | 9.12E-92  |
| FGF21        | 2.30654 | 2.16E-10  |
| ARAP3        | 2.30587 | 1.31E-166 |
| BGN          | 2.30529 | 2.22E-104 |
| GLI1         | 2.30485 | 5.73E-45  |
| PHETA2       | 2.30396 | 1.36E-187 |
| NT5DC4       | 2.30342 | 8.09E-36  |
| CFD          | 2.30236 | 8.44E-71  |
| OTX1         | 2.29921 | 6.10E-47  |
| CD36         | 2.29808 | 1.17E-49  |
| HDC          | 2.29724 | 1.02E-21  |
| EBF2         | 2.29684 | 9.55E-77  |
| TYMP         | 2.29462 | 1.10E-65  |
| FAM19A3      | 2.29417 | 4.97E-36  |
| TRIM6-TRIM34 | 2.29367 | 1.02E-02  |
| C1orf185     | 2.29028 | 1.70E-12  |

|            |         |           |
|------------|---------|-----------|
| PLK1       | 2.29020 | 2.73E-170 |
| FBLN7      | 2.28867 | 4.53E-53  |
| OASL       | 2.28810 | 3.50E-51  |
| RPL39L     | 2.28702 | 1.18E-71  |
| LY96       | 2.28594 | 1.22E-83  |
| TULP1      | 2.28291 | 4.91E-54  |
| CXCR6      | 2.28159 | 4.00E-48  |
| TENT5B     | 2.28158 | 2.20E-42  |
| ITLN2      | 2.28109 | 9.86E-17  |
| CDKN2A     | 2.28044 | 1.18E-34  |
| MPZL2      | 2.28003 | 2.63E-68  |
| CELSR1     | 2.27945 | 1.58E-54  |
| ITIH6      | 2.27922 | 5.46E-08  |
| SFRP4      | 2.27920 | 8.65E-51  |
| ADM2       | 2.27478 | 2.11E-66  |
| CLDN23     | 2.27429 | 2.34E-85  |
| FCGR3A     | 2.27422 | 1.39E-63  |
| IRX5       | 2.27362 | 3.82E-28  |
| BPIFB3     | 2.27278 | 9.11E-13  |
| TMEM158    | 2.27200 | 1.27E-81  |
| NKX2-3     | 2.27065 | 1.42E-09  |
| TP73       | 2.27018 | 2.46E-49  |
| DDIAS      | 2.26967 | 1.35E-171 |
| LCTL       | 2.26589 | 3.08E-102 |
| SPRY4      | 2.26543 | 6.35E-55  |
| BCL3       | 2.26129 | 2.94E-129 |
| BTN1A1     | 2.25739 | 8.06E-35  |
| FBXO17     | 2.25694 | 1.34E-88  |
| P2RY10     | 2.25538 | 2.47E-25  |
| DCN        | 2.25486 | 7.90E-65  |
| XCL2       | 2.25401 | 7.90E-31  |
| DLX2       | 2.25358 | 3.76E-28  |
| IL17B      | 2.24844 | 1.40E-56  |
| ISG20      | 2.24742 | 2.85E-125 |
| ITGBL1     | 2.24515 | 4.39E-39  |
| AP002748.4 | 2.24366 | 2.16E-09  |
| REG1A      | 2.24343 | 1.01E-08  |
| AKAP14     | 2.24173 | 2.78E-32  |
| HIST1H4D   | 2.23980 | 1.38E-31  |
| TREML4     | 2.23969 | 9.54E-23  |
| HIST1H4C   | 2.23885 | 1.85E-38  |
| PRG4       | 2.23540 | 6.14E-45  |
| DNAH11     | 2.23313 | 1.01E-79  |
| ROR2       | 2.23205 | 1.48E-46  |
| TAGLN      | 2.23150 | 1.97E-87  |
| OAS1       | 2.22783 | 1.60E-70  |

|            |         |           |
|------------|---------|-----------|
| CFAP73     | 2.22774 | 3.54E-32  |
| PDZK1IP1   | 2.22645 | 3.70E-32  |
| GINS2      | 2.22409 | 7.59E-176 |
| TCIM       | 2.22324 | 6.75E-66  |
| HOXD3      | 2.22114 | 1.18E-24  |
| HSPG2      | 2.21900 | 2.91E-81  |
| CENPM      | 2.21849 | 9.14E-133 |
| MCM2       | 2.21609 | 3.16E-190 |
| SIGLEC7    | 2.21541 | 4.89E-70  |
| POC1A      | 2.21510 | 1.31E-198 |
| TRIP13     | 2.21478 | 8.57E-216 |
| CRABP1     | 2.21465 | 3.81E-24  |
| TNMD       | 2.21205 | 7.89E-39  |
| KMO        | 2.20843 | 4.60E-73  |
| HIST1H2BB  | 2.20794 | 1.48E-20  |
| KIF14      | 2.20771 | 5.31E-101 |
| GPR18      | 2.20526 | 1.03E-51  |
| POTEJ      | 2.20077 | 9.24E-03  |
| HAMP       | 2.20034 | 8.79E-45  |
| NDUFA4L2   | 2.19946 | 1.42E-130 |
| FKBP9      | 2.19771 | 2.04E-167 |
| GZMK       | 2.19607 | 2.30E-30  |
| TACC3      | 2.19555 | 1.91E-156 |
| CD93       | 2.19543 | 5.03E-81  |
| LAMC1      | 2.19399 | 8.94E-140 |
| HMHB1      | 2.19238 | 1.03E-15  |
| LDLRAD2    | 2.18978 | 8.51E-54  |
| SCN4A      | 2.18694 | 2.09E-34  |
| AC008764.4 | 2.18694 | 5.73E-42  |
| C21orf62   | 2.18630 | 7.10E-58  |
| HOPX       | 2.18627 | 7.16E-49  |
| FST        | 2.18363 | 1.17E-52  |
| GAGE12F    | 2.18358 | 6.99E-10  |
| SPAG17     | 2.18268 | 7.27E-28  |
| MTFR2      | 2.18228 | 6.48E-173 |
| PSORS1C2   | 2.18112 | 8.28E-24  |
| SFTA2      | 2.18076 | 4.10E-44  |
| LXN        | 2.18026 | 2.28E-130 |
| IL10       | 2.17942 | 2.30E-60  |
| GPX7       | 2.17891 | 5.06E-206 |
| CCER2      | 2.17883 | 4.63E-61  |
| UPP1       | 2.17808 | 5.94E-118 |
| ICAM3      | 2.17488 | 2.17E-129 |
| CRIP1      | 2.17465 | 2.07E-103 |
| TMSB10     | 2.17434 | 2.83E-151 |
| GPR84      | 2.17198 | 4.75E-57  |

|            |         |           |
|------------|---------|-----------|
| KLHL4      | 2.17186 | 3.70E-75  |
| VIM        | 2.17144 | 1.17E-70  |
| AC187653.1 | 2.17105 | 4.03E-10  |
| LGALS7B    | 2.16853 | 1.92E-11  |
| ADGRE1     | 2.16743 | 1.21E-36  |
| MCTP2      | 2.16281 | 2.16E-40  |
| FGFBP2     | 2.16271 | 1.09E-30  |
| CFAP161    | 2.16175 | 8.62E-34  |
| C1R        | 2.16145 | 1.11E-52  |
| TMEM61     | 2.15740 | 2.42E-26  |
| SPINK1     | 2.15561 | 5.91E-39  |
| HS3ST3A1   | 2.15335 | 5.35E-29  |
| PDGFD      | 2.15307 | 7.99E-39  |
| STRA6      | 2.15205 | 1.43E-57  |
| BEST4      | 2.15182 | 3.49E-65  |
| IL22RA2    | 2.15061 | 4.90E-07  |
| RAB38      | 2.15029 | 2.15E-73  |
| TMSB15A    | 2.14970 | 3.23E-39  |
| ADGRE5     | 2.14895 | 1.97E-120 |
| FAM20C     | 2.14779 | 4.23E-110 |
| AEBP1      | 2.14734 | 1.60E-42  |
| PODNL1     | 2.14637 | 6.83E-52  |
| KRT7       | 2.14630 | 4.55E-30  |
| AC012254.2 | 2.14611 | 8.69E-31  |
| LBP        | 2.14534 | 1.01E-18  |
| C1RL       | 2.14316 | 2.68E-88  |
| ULBP2      | 2.14279 | 1.19E-90  |
| CENPF      | 2.14249 | 8.30E-72  |
| FRRS1      | 2.13830 | 5.75E-95  |
| MSN        | 2.13824 | 1.22E-115 |
| PLSCR1     | 2.13774 | 9.41E-123 |
| SLC11A1    | 2.13716 | 9.16E-66  |
| PSRC1      | 2.13649 | 7.01E-128 |
| WDR62      | 2.13560 | 5.32E-151 |
| TGM5       | 2.13494 | 1.55E-38  |
| S100A12    | 2.13362 | 3.53E-28  |
| SLC2A2     | 2.13322 | 1.92E-20  |
| CDCP1      | 2.13157 | 1.30E-73  |
| CLLU1OS    | 2.13004 | 1.68E-20  |
| VASN       | 2.12929 | 2.95E-41  |
| Z82206.1   | 2.12874 | 2.70E-49  |
| CLCNKB     | 2.12844 | 3.02E-54  |
| TFF3       | 2.12830 | 2.63E-25  |
| AC104389.5 | 2.12673 | 1.65E-14  |
| CD101      | 2.12447 | 1.82E-127 |
| HLA-DQA1   | 2.12239 | 1.10E-37  |

|            |         |           |
|------------|---------|-----------|
| CRYBG1     | 2.12227 | 1.60E-70  |
| CPVL       | 2.12051 | 6.42E-86  |
| AC004233.2 | 2.12027 | 4.53E-22  |
| SP6        | 2.11796 | 1.03E-77  |
| F2RL2      | 2.11777 | 6.40E-30  |
| OMP        | 2.11715 | 5.68E-42  |
| EGFLAM     | 2.11644 | 2.22E-66  |
| FAM129A    | 2.11635 | 3.98E-81  |
| CFH        | 2.11515 | 1.92E-76  |
| CIDEB      | 2.11351 | 1.01E-108 |
| ETV7       | 2.11343 | 2.57E-104 |
| NID2       | 2.11313 | 4.46E-79  |
| RAD51AP1   | 2.11270 | 1.31E-142 |
| FOXJ1      | 2.11191 | 7.51E-42  |
| RFPL4AL1   | 2.11125 | 3.22E-06  |
| ECSCR      | 2.11078 | 7.06E-102 |
| GJD3       | 2.10668 | 1.36E-09  |
| POLE2      | 2.10511 | 1.55E-171 |
| KAAG1      | 2.10462 | 2.20E-21  |
| OR2B6      | 2.10403 | 1.14E-38  |
| SMC4       | 2.10378 | 6.16E-208 |
| AC073612.1 | 2.10204 | 1.73E-07  |
| ARL9       | 2.10035 | 4.05E-68  |
| CAV1       | 2.10031 | 2.09E-54  |
| HIST2H2AB  | 2.09991 | 3.03E-27  |
| KISS1      | 2.09865 | 2.57E-22  |
| TRIM29     | 2.09748 | 2.59E-34  |
| CLEC1B     | 2.09687 | 3.28E-27  |
| PLEKHS1    | 2.09630 | 2.60E-36  |
| CENPW      | 2.09588 | 1.15E-135 |
| PRC1       | 2.09523 | 3.75E-148 |
| AC006978.2 | 2.09484 | 5.10E-57  |
| EN2        | 2.09355 | 8.00E-47  |
| RASSF10    | 2.09280 | 1.74E-26  |
| AL109827.1 | 2.09268 | 2.94E-06  |
| THBD       | 2.09220 | 2.27E-55  |
| AC090227.1 | 2.09158 | 1.02E-04  |
| MYL4       | 2.09057 | 6.91E-73  |
| GATA6      | 2.08865 | 2.06E-24  |
| ACTG2      | 2.08845 | 5.16E-36  |
| CR1        | 2.08832 | 7.59E-44  |
| EPO        | 2.08793 | 2.14E-50  |
| FOLR1      | 2.08743 | 1.87E-53  |
| PPIC       | 2.08673 | 7.07E-129 |
| CELA1      | 2.08585 | 1.68E-33  |
| FOXA1      | 2.08563 | 5.48E-13  |

|            |         |           |
|------------|---------|-----------|
| AC010255.3 | 2.08216 | 1.93E-26  |
| TMEM26     | 2.08069 | 6.24E-66  |
| PTCRA      | 2.07582 | 5.83E-41  |
| OLFML1     | 2.07517 | 4.33E-77  |
| SLC47A2    | 2.07510 | 2.69E-33  |
| TXLNB      | 2.07355 | 1.59E-45  |
| TWIST2     | 2.07315 | 4.54E-37  |
| BIRC3      | 2.07276 | 5.53E-70  |
| APOBEC3F   | 2.07259 | 7.84E-122 |
| ITPRIPL1   | 2.07244 | 2.60E-103 |
| LRRC8E     | 2.07213 | 9.58E-70  |
| NFKBIZ     | 2.07210 | 3.79E-91  |
| THEGL      | 2.06926 | 9.18E-37  |
| ZNF474     | 2.06917 | 1.75E-39  |
| CCDC8      | 2.06883 | 4.41E-48  |
| NPNT       | 2.06670 | 3.39E-36  |
| POTEG      | 2.06534 | 4.17E-18  |
| TUBB6      | 2.06524 | 3.79E-88  |
| OBP2A      | 2.06498 | 8.17E-19  |
| AL121722.1 | 2.06484 | 4.00E-14  |
| CEACAM3    | 2.06482 | 2.16E-33  |
| PLVAP      | 2.06481 | 1.28E-86  |
| CDK2       | 2.06233 | 7.53E-199 |
| PYGL       | 2.06220 | 1.54E-112 |
| FAP        | 2.06187 | 1.79E-46  |
| IFNB1      | 2.06179 | 6.06E-08  |
| SIX3       | 2.05966 | 2.03E-28  |
| APOBEC3G   | 2.05870 | 6.62E-121 |
| MMP10      | 2.05831 | 5.27E-14  |
| SOAT2      | 2.05827 | 1.31E-24  |
| ADAMTS7    | 2.05814 | 4.58E-66  |
| MMP2       | 2.05659 | 2.37E-96  |
| IKBIP      | 2.05549 | 2.48E-236 |
| ZP1        | 2.05396 | 9.36E-58  |
| MEIKIN     | 2.05387 | 1.38E-37  |
| IGFBP4     | 2.05150 | 1.51E-99  |
| CARD17     | 2.04989 | 2.27E-12  |
| IL7        | 2.04932 | 1.70E-82  |
| GPNMB      | 2.04914 | 1.88E-36  |
| GZMB       | 2.04744 | 1.00E-39  |
| NIPSNAP2   | 2.04744 | 1.91E-80  |
| ACOD1      | 2.04637 | 9.39E-09  |
| MCM10      | 2.04563 | 1.12E-56  |
| SNAI1      | 2.04428 | 2.25E-47  |
| TNFSF11    | 2.04409 | 9.12E-33  |
| TNFRSF4    | 2.04393 | 1.01E-87  |

|                |         |           |
|----------------|---------|-----------|
| TMEM189-UBE2V1 | 2.04295 | 1.77E-37  |
| CCR8           | 2.04265 | 6.33E-15  |
| APOC2          | 2.04216 | 6.70E-60  |
| LRRC36         | 2.04198 | 4.81E-104 |
| TOM1L1         | 2.04065 | 8.05E-46  |
| ATP23          | 2.04048 | 5.17E-75  |
| EOMES          | 2.03989 | 5.67E-36  |
| MTRNR2L7       | 2.03873 | 1.16E-36  |
| FOXL1          | 2.03836 | 1.97E-85  |
| PRSS21         | 2.03822 | 1.08E-29  |
| MEOX1          | 2.03783 | 1.96E-28  |
| ANKRD53        | 2.03783 | 7.10E-117 |
| S100A3         | 2.03685 | 2.60E-31  |
| CST2           | 2.03673 | 1.25E-08  |
| KCNN4          | 2.03638 | 2.75E-47  |
| IGFBP5         | 2.03606 | 2.26E-68  |
| KCNE1B         | 2.03535 | 9.34E-19  |
| ANG            | 2.03519 | 3.32E-65  |
| CLEC2B         | 2.03461 | 4.81E-72  |
| DCAF8L2        | 2.03448 | 1.10E-21  |
| CTSK           | 2.03368 | 1.31E-71  |
| CRABP2         | 2.03298 | 1.68E-65  |
| PSORS1C1       | 2.03238 | 7.95E-43  |
| FCAMR          | 2.03224 | 2.29E-18  |
| DCDC2C         | 2.02902 | 1.07E-21  |
| AFAP1L1        | 2.02834 | 3.00E-118 |
| ACE            | 2.02827 | 3.07E-92  |
| C5AR1          | 2.02689 | 3.15E-63  |
| ZBED6CL        | 2.02679 | 1.02E-50  |
| SLC27A3        | 2.02582 | 5.89E-112 |
| CAPG           | 2.02367 | 4.39E-79  |
| HAL            | 2.02198 | 3.07E-43  |
| TM4SF1         | 2.02146 | 3.59E-72  |
| CPA6           | 2.02001 | 1.64E-32  |
| RUNX1          | 2.01969 | 1.88E-74  |
| EGFL6          | 2.01743 | 1.41E-29  |
| C4orf51        | 2.01733 | 2.33E-11  |
| CDC42BPG       | 2.01580 | 1.17E-61  |
| HLA-DQB1       | 2.01575 | 5.04E-41  |
| GPR171         | 2.01560 | 2.01E-38  |
| CDC42EP5       | 2.01438 | 5.79E-55  |
| ST14           | 2.01137 | 2.48E-52  |
| TLR8           | 2.00995 | 1.40E-45  |
| ADAMTSL4       | 2.00782 | 1.27E-106 |
| CST7           | 2.00768 | 5.38E-56  |
| UBE2S          | 2.00610 | 2.01E-166 |

|        |         |          |
|--------|---------|----------|
| CASP5  | 2.00563 | 1.83E-52 |
| OBP2B  | 2.00439 | 3.03E-14 |
| LOXL4  | 2.00244 | 7.84E-36 |
| CCL2   | 2.00238 | 7.81E-28 |
| WNT10A | 2.00116 | 1.07E-40 |

---

FDR: False Discovery Rate.

**Table S6.** Genes associated with glioblastoma patients' overall survival in Reboot.

| <b>gene.symbol</b> | <b>regression.coefficient</b> |
|--------------------|-------------------------------|
| PODNL1             | 0.0114270                     |
| IKBIP              | 0.0103428                     |
| OSMR               | 0.0089689                     |
| THBD               | 0.0073175                     |
| SPAG4              | 0.0072413                     |
| HOXD11             | 0.0071885                     |
| CLEC18B            | 0.0068656                     |
| KCNN4              | 0.0066474                     |
| HOXC13             | 0.0064113                     |
| TNFSF12-TNFSF13    | 0.0055134                     |
| HOXD10             | 0.0053362                     |
| PLAUR              | 0.0050376                     |
| SECTM1             | 0.0049661                     |
| RPL39L             | 0.0048566                     |
| ANG                | 0.0046677                     |
| EFEMP2             | 0.0046008                     |
| MMP19              | 0.0043592                     |
| DDIT4L             | 0.0042875                     |
| MPZL2              | 0.0040587                     |
| EN1                | 0.0040515                     |
| SLC16A3            | 0.0036613                     |
| CCDC8              | 0.0036318                     |
| ITGA5              | 0.0034568                     |
| IL6                | 0.0034342                     |
| LOXL1              | 0.0032843                     |
| UPP1               | 0.0031997                     |
| HOXB7              | 0.0031809                     |
| VASN               | 0.0031462                     |
| MMP11              | 0.0031151                     |
| PTX3               | 0.0031112                     |
| LSP1               | 0.0030449                     |
| SLC43A3            | 0.0028308                     |
| ISG20              | 0.0026915                     |
| HOXA2              | 0.0026319                     |
| SOCS3              | 0.0025745                     |
| PDLIM4             | 0.0025696                     |
| MND1               | 0.0024229                     |
| C1RL               | 0.0023726                     |
| STC1               | 0.0023486                     |
| DKK1               | 0.0023052                     |
| STRA6              | 0.0021638                     |
| CLEC2B             | 0.0021004                     |

|           |           |
|-----------|-----------|
| CAV1      | 0.0020853 |
| GAS2L3    | 0.0020127 |
| RRM2      | 0.0019973 |
| LIF       | 0.0019962 |
| MMP2      | 0.0019744 |
| PLBD1     | 0.0019181 |
| FOSL1     | 0.0018222 |
| DIRAS3    | 0.0017363 |
| PAX3      | 0.0016939 |
| TWIST1    | 0.0016822 |
| FEZF1     | 0.0016798 |
| CLCF1     | 0.0016679 |
| CD248     | 0.0016121 |
| FKBP9     | 0.0015888 |
| TUBA1C    | 0.0015583 |
| HOXB13    | 0.0015575 |
| MMP9      | 0.0015481 |
| FAM20C    | 0.0015445 |
| SDC1      | 0.0015131 |
| CD70      | 0.0015031 |
| CAVIN3    | 0.0014877 |
| FAM20A    | 0.0014828 |
| PBK       | 0.0014662 |
| FCGR2B    | 0.0014616 |
| PTTG1     | 0.0014509 |
| TNFRSF12A | 0.0014115 |
| FGFBP2    | 0.0012573 |
| SPON2     | 0.0012140 |
| IL10      | 0.0012005 |
| COL5A1    | 0.0011849 |
| TUBB6     | 0.0011846 |
| COL8A1    | 0.0011767 |
| PLA2G5    | 0.0011626 |
| FBLIM1    | 0.0011228 |
| SRPX2     | 0.0010772 |
| CTSK      | 0.0010118 |
| ADM       | 0.0010081 |
| CENPM     | 0.0009951 |
| IGLL5     | 0.0009822 |
| LOX       | 0.0009814 |
| F2RL2     | 0.0009687 |
| KRT7      | 0.0009598 |
| AQP9      | 0.0009371 |
| SERPINA1  | 0.0009191 |
| MDK       | 0.0009182 |
| ICAM3     | 0.0009146 |

|            |           |
|------------|-----------|
| HMOX1      | 0.0008212 |
| CA9        | 0.0008038 |
| CDKN3      | 0.0008021 |
| LDHA       | 0.0007943 |
| HK3        | 0.0007841 |
| PLAT       | 0.0007611 |
| HSPG2      | 0.0007561 |
| GPRC5A     | 0.0007480 |
| IGFBP5     | 0.0007333 |
| RUNX1      | 0.0007332 |
| CAPG       | 0.0007231 |
| CKS2       | 0.0007134 |
| C1R        | 0.0007110 |
| FAP        | 0.0007039 |
| CARD16     | 0.0006962 |
| S100A11    | 0.0006937 |
| CRIP1      | 0.0006834 |
| SPOCD1     | 0.0006744 |
| LYZ        | 0.0006659 |
| BGN        | 0.0006529 |
| LAMC1      | 0.0006522 |
| ANXA2      | 0.0006499 |
| CD52       | 0.0006293 |
| MMP14      | 0.0006128 |
| LY96       | 0.0006002 |
| CLIC1      | 0.0005587 |
| PHLDA2     | 0.0005308 |
| ANPEP      | 0.0005164 |
| MGP        | 0.0005120 |
| COL6A2     | 0.0005010 |
| METTL1     | 0.0005007 |
| COL1A1     | 0.0004979 |
| PDGFD      | 0.0004913 |
| LGALS3     | 0.0004847 |
| SERPING1   | 0.0004818 |
| AC087632.1 | 0.0004649 |
| IFI30      | 0.0004532 |
| POSTN      | 0.0004495 |
| FABP5      | 0.0004385 |
| CNPY1      | 0.0004380 |
| LUM        | 0.0004376 |
| TYMP       | 0.0004365 |
| S100A4     | 0.0004266 |
| RARRES2    | 0.0004233 |
| TCIM       | 0.0004224 |
| CCNB1      | 0.0004157 |

|          |           |
|----------|-----------|
| AEBP1    | 0.0004046 |
| SERPINH1 | 0.0004034 |
| CA3      | 0.0003880 |
| PLP2     | 0.0003802 |
| SNAI2    | 0.0003708 |
| PDLIM1   | 0.0003676 |
| CCL20    | 0.0003609 |
| NID2     | 0.0003539 |
| SERPINE1 | 0.0003402 |
| PRC1     | 0.0003356 |
| CCL18    | 0.0003255 |
| TFF3     | 0.0003252 |
| EMP3     | 0.0003185 |
| CFB      | 0.0003115 |
| PCLAF    | 0.0003067 |
| SLC11A1  | 0.0003035 |
| IGFBP2   | 0.0003021 |
| HILPDA   | 0.0002923 |
| MSR1     | 0.0002845 |
| TIMP1    | 0.0002829 |
| FN1      | 0.0002794 |
| C21orf62 | 0.0002657 |
| DCN      | 0.0002642 |
| MOXD1    | 0.0002545 |
| PIMREG   | 0.0002385 |
| MAP3K7CL | 0.0002384 |
| MARCH9   | 0.0002209 |
| LGALS1   | 0.0002137 |
| TOP2A    | 0.0002120 |
| SLC27A3  | 0.0002115 |
| TMSB15A  | 0.0002019 |
| PLAU     | 0.0001932 |
| PLVAP    | 0.0001886 |
| ANXA1    | 0.0001718 |
| TMSB10   | 0.0001592 |
| CCL2     | 0.0001564 |
| TYMS     | 0.0001558 |
| RAB34    | 0.0001548 |
| FMOD     | 0.0001462 |
| TGFBI    | 0.0001454 |
| APOL4    | 0.0001332 |
| IGFBP3   | 0.0001331 |
| COL1A2   | 0.0001237 |
| TM4SF1   | 0.0001174 |
| MS4A6A   | 0.0001156 |
| ALOX5AP  | 0.0001148 |

|            |            |
|------------|------------|
| HAMP       | 0.0001139  |
| SPRY4      | 0.0001124  |
| TSPAN31    | 0.0001118  |
| HLA-DQB1   | 0.0001008  |
| AC008764.4 | 0.0000952  |
| IL1R2      | 0.0000926  |
| F13A1      | 0.0000867  |
| METTL7B    | 0.0000754  |
| S100A9     | 0.0000738  |
| CXCL8      | 0.0000730  |
| HIST2H2AA3 | 0.0000683  |
| C5AR1      | 0.0000617  |
| CD163      | 0.0000598  |
| APCDD1L    | 0.0000577  |
| SPP1       | 0.0000535  |
| TAGLN2     | 0.0000521  |
| WISP1      | 0.0000510  |
| PLIN2      | 0.0000508  |
| G0S2       | 0.0000456  |
| IL4I1      | 0.0000443  |
| CHI3L1     | 0.0000438  |
| ESM1       | 0.0000414  |
| PI3        | 0.0000387  |
| APOC2      | 0.0000374  |
| CASP4      | 0.0000322  |
| GPNMB      | 0.0000315  |
| SERPINA3   | 0.0000215  |
| VEGFA      | 0.0000204  |
| CDK4       | 0.0000182  |
| COL4A1     | 0.0000179  |
| SLPI       | 0.0000150  |
| HLA-DRA    | 0.0000084  |
| PCOLCE     | 0.0000082  |
| VIM        | 0.0000072  |
| TAGLN      | 0.0000046  |
| HOPX       | -0.0000035 |
| SOD2       | -0.0000057 |
| PDPN       | -0.0000074 |
| COL4A2     | -0.0000105 |
| LTF        | -0.0000112 |
| CPVL       | -0.0000178 |
| NNMT       | -0.0000184 |
| MEST       | -0.0000232 |
| EMILIN3    | -0.0000265 |
| CHI3L2     | -0.0000280 |
| FABP7      | -0.0000353 |

|          |            |
|----------|------------|
| FCGR3A   | -0.0000357 |
| TREM1    | -0.0000608 |
| ACE      | -0.0000692 |
| CDKN2C   | -0.0000772 |
| MEOX2    | -0.0000993 |
| SOCS2    | -0.0001031 |
| FCGBP    | -0.0001367 |
| FAM183A  | -0.0001417 |
| FSTL1    | -0.0001434 |
| MFAP2    | -0.0001444 |
| ADGRE5   | -0.0001705 |
| PLA2G2A  | -0.0001756 |
| GBP1     | -0.0001756 |
| EGFR     | -0.0002695 |
| CAMP     | -0.0003299 |
| PLSCR1   | -0.0003793 |
| GRB14    | -0.0005072 |
| HP       | -0.0005364 |
| DPP4     | -0.0005646 |
| NIPSNAP2 | -0.0005833 |
| SHOX2    | -0.0005901 |
| PKIB     | -0.0007954 |
| NCAPH    | -0.0008746 |
| NOS2     | -0.0008881 |
| BARX1    | -0.0010333 |
| KLHL4    | -0.0016877 |
| TEAD2    | -0.0026009 |
| RAD54L   | -0.0039478 |
| ZNF474   | -0.0065595 |

---

**Table S7.** Functional annotation of genes associated with glioblastoma patients' overall survival based on MSigDB Hallmarks.

| hallmark                          | genes.in.list | total.genes | FDR      | genes                                                                                                                                                                                                                                                                     |
|-----------------------------------|---------------|-------------|----------|---------------------------------------------------------------------------------------------------------------------------------------------------------------------------------------------------------------------------------------------------------------------------|
| EPITHELIAL MESENCHYMAL TRANSITION | 48            | 197         | 3.06E-49 | COL5A1 COL1A1 FN1 SERPINE1 COL1A2 COL4A1 COL4A2 IGFBP3 TGFB1 LUM LAMC1 LOX TAGLN COL6A2 NNMT MMP2 FAP BGN SERPINH1 FSTL1 POSTN SPP1 NID2 VIM LOXL1 TIMP1 EMP3 ITGA5 MGP VEGFA SDC1 PCOLCE MEST EFEMP2 IGFBP2 ANPEP MMP14 TNFRSF12A FMOD PLAUR IL6 PTX3 DKK1 SNAI2 DCN LGA |
| COAGULATION                       | 18            | 136         | 2.55E-13 | MMP14 C1R SERPINE1 SERPING1 MMP2 MMP9 THBD MMP11 TIMP1 PLAU PLAT FN1 F2RL2 CTSK ANXA1 APOC2 DPP4 ANG                                                                                                                                                                      |
| HYPOXIA                           | 20            | 194         | 5.48E-13 | ADM VEGFA LDHA SERPINE1 LOX IGFBP3 ISG20 STC1 PLIN2 HMOX1 CAV1 PLAUR S100A4 EGFR BGN ANXA2 TGFB1 DCN IL6 COL5A1                                                                                                                                                           |
| KRAS SIGNALING UP                 | 20            | 194         | 5.48E-13 | GOS2 SLP1 MMP11 MMP9 IGFBP3 SPP1 LY96 ACE PLAUR PLAT LIF CCL20 HOXD11 KCN4 SERPINA3 MP2L2 F13A1 PLVAP PLAU GPNMB                                                                                                                                                          |
| APOPTOSIS                         | 16            | 159         | 2.20E-10 | CASP4 TNFRSF12A TIMP1 LGALS3 LUM HMOX1 MMP2 PLAT DCN SOD2 BGN IL6 CAV1 ANXA1 TOP2A ISG20                                                                                                                                                                                  |
| COMPLEMENT                        | 17            | 195         | 4.33E-10 | C1R SERPINE1 MMP14 SERPING1 TIMP1 DPP4 PLAUR CASP4 FN1 S100A9 PLAT LTF PLSCR1 COL4A2 ANG IL6 LGALS3                                                                                                                                                                       |
| INFLAMMATORY RESPONSE             | 17            | 197         | 4.36E-10 | CCL2 CCL20 IL6 AQP9 LIF ADM PLAUR MMP14 TIMP1 OSMR IL10 SERPINE1 PDPN ITGA5 MSR1 C5AR1 EMP3                                                                                                                                                                               |
| ANGIOGENESIS                      | 9             | 36          | 7.40E-10 | POSTN FSTL1 STC1 VEGFA THBD SPP1 S100A4 TIMP1 LUM                                                                                                                                                                                                                         |
| TNFA SIGNALING VIA NFKB           | 14            | 198         | 1.86E-07 | CCL20 PLAUR SOD2 IL6 LIF PTX3 FOSL1 CCL2 SOCS3 SERPINE1 PLAU GOS2 VEGFA CLCF1                                                                                                                                                                                             |
| GLYCOLYSIS                        | 14            | 198         | 1.86E-07 | VEGFA LDHA SDC1 IGFBP3 EGFR SPAG4 SLC16A3 COL5A1 TFF3 STC1 ISG20 DCN ANG TGFB1                                                                                                                                                                                            |
| INTERFERON GAMMA RESPONSE         | 13            | 198         | 1.20E-06 | PLSCR1 ISG20 SOCS3 SERPING1 SOD2 IFI30 CCL2 SECTM1 UPP1 IL6 CASP4 C1R METTL7B                                                                                                                                                                                             |
| IL2 STAT5 SIGNALING               | 11            | 195         | 3.77E-05 | SOCS2 IL10 LIF CAPG SPP1 IL1R2 HOPX PLSCR1 PLIN2 F2RL2 SPRY4                                                                                                                                                                                                              |
| ALLOGRAFT REJECTION               | 11            | 199         | 4.21E-05 | IL10 HLA-DRA IL6 TIMP1 MMP9 EGFR FCGR2B CCL2 LIF CAPG NOS2                                                                                                                                                                                                                |
| UV RESPONSE DN                    | 9             | 141         | 7.62E-05 | ANXA2 RUNX1 SERPINE1 COL1A2 CAV1 LAMC1 COL1A1 IGFBP5 SNAI2                                                                                                                                                                                                                |
| IL6 JAK STAT3 SIGNALING           | 7             | 87          | 1.28E-04 | SOCS3 OSMR IL6 IL1R2 TNFRSF12A HMOX1 PLA2G2A                                                                                                                                                                                                                              |
| ESTROGEN RESPONSE LATE            | 10            | 198         | 1.79E-04 | TFF3 ISG20 SERPINA3 CAV1 S100A9 FABP5 MEST MDK TOP2A LTF                                                                                                                                                                                                                  |
| CHOLESTEROL HOMEOSTASIS           | 6             | 73          | 3.46E-04 | LGALS3 PLSCR1 TNFRSF12A PLAUR FABP5 S100A11                                                                                                                                                                                                                               |
| G2M CHECKPOINT                    | 9             | 195         | 7.03E-04 | TOP2A PRC1 CKS2 PTTG1 CDKN3 CDKN2C RAD54L CDK4 PBK                                                                                                                                                                                                                        |
| E2F TARGETS                       | 8             | 196         | 3.10E-03 | CKS2 TOP2ARRM2 CDKN3 CENPM CDKN2C PTTG1 CDK4                                                                                                                                                                                                                              |

FDR: False Discovery Rate.

Table S8. Functional annotation of genes associated with glioblastoma patients' overall survival based on Gene Ontology (GO) terms for biological processes.

| GO group                          | GO term                                                | genes.in.list | total.genes | FDR      | genes                                                                                                                                                                                                                                                                                                        |
|-----------------------------------|--------------------------------------------------------|---------------|-------------|----------|--------------------------------------------------------------------------------------------------------------------------------------------------------------------------------------------------------------------------------------------------------------------------------------------------------------|
| inflammatory response             | Cellular response to acid chemical                     | 12            | 218         | 6.59E-05 | VEGFA TEAD2 MMP2 HAMP HOXA2 COL1A1 CNB1 CDK4 EGFR COL1A2 PDGFR COL4A1                                                                                                                                                                                                                                        |
| inflammatory response             | Inflammatory response                                  | 45            | 856         | 5.53E-16 | CCL2 CCL20 PLA2G5 ANXA1 CXCL8 CSAR1 HP CCL18 OSMR NOS2 IL6 IL10 SERPING1 S100A9 SLC11A1 TMP1 HAMP RARRES2 FN1 IL1R2 SDC1 SPP1 TREM1 ALOX5AP CH3L1 EGFR LY96 PBK CD163 SOCS3 SERPINA3 CASP4 SERPINA1 SERPINE1 HMOX1 FCGR2B PLSCR1 LY2 MMP9 ADGRE5 HSPG2 ADM C1R PTK3 PLA2                                     |
| inflammatory response             | Negative regulation of catalytic activity              | 28            | 848         | 4.80E-06 | GRPSC5 TMP1 CAV1 SERPINE1 ANXA1 PKIB SERPING1 SERPINH1 CDC68 SPRY4 SERPINA3 SERPINA1 LGLA3S LTF VEGFA SPOCD1 PTK3 CARD16 HP CDKN2C PI3 SLP1 PTTG1 ANXA2 SOCS3 APOC2 PLAUR MMP9                                                                                                                               |
| inflammatory response             | Regulation of response to external stimulus            | 39            | 903         | 2.88E-11 | RARRES2 VEGFA PLAUR PLA2G5 ANXA1 ANXA2 COL18 FAP SERPINE1 OSMR NOS2 LTF SNA2 CCL2 IL6 SERPING1 PDPN S100A9 CARD16 IL1R2 SPP1 ALOX5AP IL10 EGFR LY96 FABP7 PBK PDGFR THBD SOCS3 CSAR1 CXCL8 CAV1 FCGR2B PLAUR MMP9 PLAT C1R PLA2G2A                                                                           |
| inflammatory response             | Regulation of response to stimulus                     | 105           | 4820        | 1.62E-11 | LGLA1S HMOX1 SECTM1 GRPSC5 ANXA1 ANXA2 COL18 FAP SERPINE1 OSMR NOS2 LTF SNA2 CCL2 IL6 SERPING1 PDPN S100A9 CARD16 IL1R2 SPP1 ALOX5AP IL10 EGFR LY96 FABP7 PBK PDGFR THBD SOCS3 CSAR1 CXCL8 CAV1 FCGR2B PLAUR MMP9 PLAT C1R PLA2G2A                                                                           |
| inflammatory response             | Response to abiotic stimulus                           | 40            | 1309        | 1.51E-07 | VEGFA TEAD2 VEGFA ANXA1 EGFR RCLAF TCM1 DPP4 CARD16 CRIP1 ANG NOS2 DCN SNA2 RADS4L HMOX1 PLAT HAMP CAV1 CA9 PDLIM1 MDK1 IGFBP2 TWIST1 PLAUR POSTN CNB1 CDK4 ADM MMP14 STC1 PBK VASN FOSL1 THBD CH3L1 HILPDA STRA6 AQP9 IKBIP                                                                                 |
| inflammatory response             | Response to acid chemical                              | 15            | 360         | 1.31E-04 | MMP2 TEAD2 MMP2 HAMP HOXA2 DKK1 COL1A1 IGFBP2 CNB1 CDK4 EGFR COL1A2 PDGFR TYMS COL4A1                                                                                                                                                                                                                        |
| inflammatory response             | Response to biotic stimulus                            | 38            | 1085        | 1.35E-08 | NOS2 SLC11A1 LYZ HAMP CAMP CXCL8 IGLL5 LTF CAV1 CCL2 SLP1 IL6 IL10 LY96 S100A9 ISG20 CARD16 DCN FAM20A CCL2 GBP1 LOXL1 CDK4 ADM SPON2 PTK3 CA3 THBD PLSCR1 CSAR1 HP SERPINE1 VIM RARRES2 FCGR2B F3L1 FOSL1 PLA2G2A                                                                                           |
| inflammatory response             | Response to cytokine                                   | 51            | 1372        | 1.87E-12 | TIMP1 CCL2 CCL20 PLA2G5 ANXA1 CXCL8 CR18 PLVAP IL6 OSMR CASP4 NOS2 SLC11A1 VIM HAMP CAV1 POCLE2 COL1A1 LOX IL1R2 CH3L1 POSTN CDK4 FOSL1 TYMS SOCS3 SPRY4 SERPINE1 CARD16 PLP2 CLCF1 TNFRSF12A MMP2 HMOX1 MMP9 SOD2 VEGFA FN1 SDC1 SOCS2 TWIST1 F13A1 LIF IL10 RUNX1 IC                                       |
| inflammatory response             | Response to drug                                       | 30            | 1082        | 4.44E-05 | ANXA1 STRA6 HMOX1 CAV1 IL6 HP NOS2 SLC11A1 RADS4L LGLA1S HAMP CA9 COL1A1 MDK LOX IGFBP2 SDC1 CNB1 CDK4 IL10 EGFR PLN2 PDPN CA3 NNMT PDGFR FOSL1 TYMS APOC2 VIM                                                                                                                                               |
| inflammatory response             | Response to endogenous stimulus                        | 49            | 1704        | 2.18E-08 | NOS2 TIMP1 SDC2 ANXA1 VASN SOCS3 SPRY4 ANXA1 RARRES2 IGFBP5 SPP1 IL6 IL10 EGFR COL1A1 AN2 AMP2 CA9 DKK1 COL1A1 MDK LOX IGFBP2 SDC1 CNB1 CDK4 ADM MMP14 STC1 HOXB13 PDGFR FOSL1 TYMS FAM20C ANXA2 COL4A1 AQP9 CCL2 CXCL8 VIM GRB14 CASP4 FCGR2B FMO2                                                          |
| inflammatory response             | Response to external stimulus                          | 81            | 2561        | 1.32E-16 | NOS2 SLC11A1 LYZ HAMP RARRES2 CCL2 COL1A1 VEGFA CCL20 PLAUR PLA2G5 ANXA1 CAMP CXCL8 ANXA2 IGL5 CCL18 FAP SERPINE1 IL6 OSMR LTF SNA2 ANXA1 SPP1 SLP1 LGLA3S POSTN IL10 SERPING1 LY96 PDPN S100A9 ISG20 CARD16 DCN TYMP HMOX1 HOXA2 FAM20A MDK LOX IGFBP2 IL1R2 GBP1 FEZF1 LOXL                                |
| inflammatory response             | Response to inorganic substance                        | 20            | 586         | 9.90E-05 | ANXA1 MMP9 AQP9 ALOX5AP IL6 CRIP1 HP HMOX1 CAV1 COL1A1 SDC2 IGFBP2 SDC1 CNB1 CDK4 ADM MMP14 STC1 HOXB13 PDGFR FOSL1                                                                                                                                                                                          |
| inflammatory response             | Response to organophosphorus                           | 10            | 137         | 3.64E-05 | PLA2G5 IGFBP5 COL1A1 SDC1 MMP19 STC1 FOSL1 THBD AQP9 TYMS                                                                                                                                                                                                                                                    |
| inflammatory response             | Response to oxygen levels                              | 22            | 408         | 3.94E-08 | MMP2 VEGFA DPP4 CARD16 ANG NOS2 HMOX1 PLAT CAV1 CA9 PDLIM1 COL1A1 TWIST1 PLAUR POSTN CNB1 CDK4 ADM MMP14 STC1 VASN HILPDA                                                                                                                                                                                    |
| inflammatory response             | Response to reactive oxygen species                    | 13            | 233         | 2.73E-05 | ANXA1 MMP9 IL6 HP MMP2 HMOX1 COL1A1 SDC2 SDC1 IL10 PDGFR FOSL1 EGFR                                                                                                                                                                                                                                          |
| inflammatory response             | Response to stress                                     | 114           | 4507        | 1.98E-17 | CLIC1 NOS2 MMP2 LY2 HMOX1 HAMP RARRES2 CCL2 VEGFA CCL20 PLAUR PLA2G5 ANXA1 PTK3 CAMP PCLAF CXCL8 ANXA2 CSAR1 IGLL5 HP CCL18 FAP CAV1 SERPINE1 OSMR TNFRSF12A LTF MMP9 DKK1 GBP1 SLP1 F13A1 TOP2A IL6 IL10 EGFR SERPING1 PDPN S100A9 TCM1 DPP4 CARD16 CRIP1 ANG DCN SLC11A1 VIF                               |
| inflammatory response             | Response to wounding                                   | 38            | 716         | 1.51E-13 | CLIC1 PLAUR ANXA1 ANXA2 FAP SERPINE1 TNFRSF12A F13A1 PDPN DCN SLC11A1 LGLA1S TIMP1 COL1A1 MDK LOX FN1 SDC1 SPP1 POSTN CNB1 IL10 EGFR ADM SERPING1 F2R2L THBD SERPINA1 ITGA5 HMOX1 CAV1 COL5A1 PLAUR PLSCR1 PLAT IL6 HOXB13 COL1A2                                                                            |
| developmental process             | Anatomical structure morphogenesis                     | 81            | 2785        | 1.06E-11 | CLIC1 PLAUR ANXA1 ANXA2 FAP SERPINE1 TNFRSF12A F13A1 PDPN DCN SLC11A1 TIMP1 COL1A1 MDK LOX FN1 SDC1 POSTN CNB1 EGFR SERPING1 F2R2L THBD SERPINA1 ITGA5 HMOX1 CAV1 COL5A1 PLAUR PLSCR1 PLAT IL6 HOXB13                                                                                                        |
| developmental process             | Animal organ regeneration                              | 9             | 83          | 1.31E-14 | HOXA2 FAM20A VEGFA ANXA1 COL5A2 ESM1 FAM20C ANXA2 IGL5 DCN LTF HMOX1 SERPINE1 DKK1 CCL2 FN1 LIF COL5A1 COL4A2 CAV1 MEK2 STC1 CXCL8 HOPX ANG TNFRSF12A SNA2 TYMP TEAD2 FAP MMP2 SPRX2 CAV1 MEK2 CA9 COL1A1 LOX IGFBP5 SDC1 SPP1 TWIST1 MMP19 HOXC13 FEZF1 HOXD10 CH3L1 P                                      |
| developmental process             | Blood vessel development                               | 46            | 687         | 5.69E-06 | HMOX1 HAMP CDK4 IL10 EGFR ADM NNMT TYMS CSAR1                                                                                                                                                                                                                                                                |
| developmental process             | Blood vessel development                               | 46            | 687         | 5.64E-20 | COL1A1 VEGFA ANXA1 ESM1 ANXA2 IL6 DCN HMOX1 COL4A2 ADM CXCL8 ANG TNFRSF12A TYMP TEAD2 FAP MMP2 SPRX2 CAV1 MEK2 LOX FN1 MMP19 LOK1 COL5A1 CH3L1 IL10 HSPG2 COL8A1 MMP14 ITGA5 ANPEP PDGFR FOSL1 SOCS3 COL4A1 CSAR1 SERPINE1 TGFBI HOXB13 STRA6 COL1A2 RUNX1 TWIST1 GPI                                        |
| developmental process             | Circulatory system development                         | 56            | 1077        | 7.15E-20 | COL1A1 VEGFA ANXA1 ESM1 ANXA2 IL6 DCN HMOX1 DKK1 SDC2 COL4A2 ADM CXCL8 ANG TNFRSF12A SNA2 TYMP TEAD2 FAP MMP2 SPRX2 HAMP CAV1 MEK2 LOX FN1 TWIST1 MMP19 LIF LOXL1 COL5A1 CH3L1 CNB1 IL10 HSPG2 COL8A1 MMP14 ITGA5 ANPEP SHOX2 PDGFR FOSL1 SOCS3 COL4A1 CSAR1 SERPINE                                         |
| developmental process             | Connective tissue development                          | 19            | 280         | 1.43E-08 | COL8A2 ANXA2 STC1 SNA2 TIMP1 COL1A1 MGP LOX TGFBI COL5A1 CDK4 LUM CTSK SERPINH1 SHOX2 PDGFR FOSL1 CH3L1                                                                                                                                                                                                      |
| developmental process             | Embryo development                                     | 34            | 1054        | 5.56E-07 | HOXA2 MEK2 DKK1 FN1 COL5A1 HOPX TEAD2 TWIST1 LIF HOXD10 TOP2A CNB1 IL10 EGFR ADM MMP14 EN1 SHOX2 TMS4F1 FOSL1 PHLD2A SOCS3 HOXB7 MMP2 MMP9 MFA2P COL4A2 COL8A1 CXCL8 RARRES2 COL1A1 STRA6 ITGA5 VEGFA                                                                                                        |
| developmental process             | Endometrial cell differentiation                       | 9             | 51          | 1.25E-07 | DKK1 FN1 COL5A1 MMP2 MMP9 COL4A2 COL8A1 MMP14 ITGA5                                                                                                                                                                                                                                                          |
| developmental process             | Muscle structure development                           | 22            | 645         | 3.96E-05 | DKK1 SDC2 IGFBP5 DCN LGLA1S HAMP CAV1 MEK2 LOX IGFBP5 SDC1 TWIST1 LIF HOXD10 CNB1 PAX3 ADM MMP14 SHOX2 STRA6 VEGFA TAGLN                                                                                                                                                                                     |
| developmental process             | Negative regulation of developmental process           | 31            | 1017        | 5.95E-06 | ANXA1 ANXA2 DCN DKK1 COL5A1 COL4A2 HOPX VIM MMP14 LGLA1S MMP9 CAV1 HOXA2 IGFBP5 SPP1 SDC2 TWIST1 POSTN CTSK SERPINE1 MEK2 SNA2 TIMP1 GBP1 EGFR VASN LTF RUNX1 IL6 FCGR2B HSPG2                                                                                                                               |
| developmental process             | Ossification                                           | 22            | 396         | 2.40E-08 | COL1A1 SPP1 LTF MMP2 MMP9 HOXA2 DKK1 MGP LOX IGFBP5 TWIST1 GPNMB CTSK IGFBP5 MMP14 STC1 COL1A2 SHOX2 FAM20C SNA2 EGFR IL6                                                                                                                                                                                    |
| developmental process             | Osteoblast differentiation                             | 13            | 218         | 1.45E-05 | SPP1 LTF HOXA2 COL1A1 LOX IGFBP5 TWIST1 GPNMB IGFBP3 SHOX2 FAM20C SNA2 IL6                                                                                                                                                                                                                                   |
| developmental process             | Regeneration                                           | 13            | 204         | 7.68E-06 | ANXA1 HMOX1 HAMP SPP1 POSTN CNB1 CDK4 IL10 EGFR ADM NNMT TYMS CSAR1                                                                                                                                                                                                                                          |
| developmental process             | Regulation of developmental process                    | 74            | 2763        | 1.84E-11 | VEGFA LIF ANXA1 ANXA2 IL6 ACE DCN LTF HMOX1 SPRX2 SERPINE1 DKK1 CCL2 COL1A1 MDK SDC2 COL5A1 COL4A2 IGFBP3 CXCL8 HOPX TNFRSF12A SNA2 VIM MSR1 TEAD2 MMP14 LGLA1S MMP9 HAMP CAV1 HOXA2 MGP LOX FN1 IGFBP5 SPP1 SDC2 TWIST1 FEZF1 CH3L1 POSTN CNB1 CDK4 IL10 CTSK ADM MMF                                       |
| developmental process             | Regulation of multicellular organismal process         | 83            | 3323        | 3.93E-11 | VEGFA SPP1 PLAUR ANXA1 ANXA2 CARD16 APOC2 FAP CAV1 SERPINE1 IL6 ACE NOS2 DCN LTF HMOX1 SPRX2 DKK1 COL1A1 MDK SDC2 FN1 LIF COL5A1 COL4A2 HILPDA GPNMB IL10 ADM STC1 PDPN CXCL8 TNFRSF12A SLC11A1 SNA2 VIM LGLA1S MMP9 HAMP HOXA2 MGP LOX IGFBP5 IL1R2 SOCS2 TWIST1 GOS2 FEZF                                  |
| developmental process             | Reproductive structure development                     | 20            | 445         | 2.61E-06 | ANXA1 DCN SDC1 MMP19 LIF IL10 EGFR ADM MMP14 STC1 HOXB13 PTK3 FOSL1 PHLD2A SOCS3 CRIP1 STRA6 VEGFA ANG SPP1                                                                                                                                                                                                  |
| developmental process             | Reproductive system development                        | 20            | 449         | 2.88E-06 | ANXA1 DCN SDC1 MMP19 LIF IL10 EGFR ADM MMP14 STC1 HOXB13 PTK3 FOSL1 PHLD2A SOCS3 CRIP1 STRA6 VEGFA ANG SPP1                                                                                                                                                                                                  |
| developmental process             | Skeletal system development                            | 26            | 541         | 1.54E-08 | HOXA2 COL1A1 COL8A2 MMP14 ANXA2 IGL5 LTF STC1 SNA2 MMP2 MMP9 TIMP1 MGP LOX TGFBI TWIST1 HOXD10 LUM CTSK SERPINH1 SHOX2 TYMS FAM20C HOXB7 COL1A2 CH3L1 EN1                                                                                                                                                    |
| developmental process             | Tissue development                                     | 77            | 2168        | 2.47E-18 | MEK2 FAMD2A BARX1 ANXA1 COL8A2 FAM20C ANXA2 SERPINE1 DKK1 COL1A1 FN1 LIF COL5A1 IL6 TAGLN TAGLN2 STC1 DCN SNA2 VIM TEAD2 MMP2 HAMP CAV1 CA9 MGP LOX IGFBP5 SDC1 SPP1 TGFBI TWIST1 HOXC13 HOXD10 POSTN CNB1 CDK4 GPNMB IL10 LUM CTSK EGFR ADM SERPINH1 MMP14 HOXE                                             |
| developmental process             | Tissue remodeling                                      | 14            | 167         | 1.51E-07 | MMP2 SPP1 ANXA1 ACE GPNMB TIMP1 CAV1 IGFBP5 LIF CTSK EGFR MMP14 BDN IL6                                                                                                                                                                                                                                      |
| developmental process             | Tube morphogenesis                                     | 51            | 1062        | 1.32E-16 | VEGFA ANXA1 ESM1 ANXA2 IL6 DCN HMOX1 LIF COL4A2 ADM CXCL8 ANG TNFRSF12A TYMP TEAD2 FAP MMP2 SPRX2 CAV1 MEK2 LOX FN1 IGFBP5 SDC1 TWIST1 MMP19 HMOX1 CNB1 IL10 HSPG2 COL8A1 EGFR MMP14 ITGA5 EN1 ANPEP SHOX2 TYMS COL4A1 CSAR1 HOXB7 SERPINE1 TGFBI HOXB13 RARRES2 STRA                                        |
| developmental process             | Urogenital system development                          | 14            | 346         | 1.59E-14 | VEGFA ANXA1 ESM1 ANXA2 IL6 DCN HMOX1 COL4A2 ADM CXCL8 ANG TNFRSF12A TYMP TEAD2 FAP MMP2 SPRX2 CAV1 MEK2 LOX FN1 TWIST1 MMP19 CH3L1 IL10 HSPG2 COL8A1 EGFR MMP14 ITGA5 ANPEP SHOX2 COL4A1 CSAR1 HOXB7 SERPINE1 TGFBI HOXB13 STRA6 HOXD11 RUNX1 GPNMB CCL2                                                     |
| cell communication                | Cell surface receptor signaling pathway                | 84            | 3287        | 3.38E-12 | GRPSC5 PLAT DKK1 CCL2 COL1A1 VEGFA CCL20 IGFBP2 IGFBP5 SOCS2 GOS2 LIF COL4A2 ANXA1 TSPAN31 EGFR IGFBP3 ESM1 VASN CXCL8 PDGFR CLCF1 TCM1 SOCS3 SPRY4 CSAR1 IGLL5 CCL18 DCN LTF SNA2 FCGR2B KNKN4 CAV1 RARRES2 PLVAP LGLA3S IL6 COL1A2 CASP4 CARD16 TNFRSF12A PLAUR VIM LOX I                                  |
| cell communication                | Intracellular signal transduction                      | 58            | 3113        | 3.69E-04 | LGLA1S HMOX1 SECTM1 NOS2 TEAD2 CCL2 RAB3A CCL20 ADGRE5 PLA2G5 F2R2L PDGFR SPRY4 PLA2G2A CCL18 FOSL1 GPNMB IL6 DCN LTF VEGFA FN1 LIF IGFBP5 PLVAP SDC1 SPP1 SDC1 SNA2 VIM LGLA3S GPNMB IL10 ADM STC1 PDPN CXCL8 TNFRSF12A SLC11A1 SNA2 VIM LGLA1S MMP9 HAMP HOXA2 MGP LOX IGFBP5 IL1R2 SOCS2 TWIST1 GOS2 FEZF |
| cell communication                | Regulation of cell communication                       | 84            | 3903        | 1.37E-08 | LGLA1S HMOX1 SECTM1 GRPSC5 DKK1 CCL2 CCL20 IGFBP2 IGFBP5 SOCS2 GOS2 PLA2G5 ANXA1 IGFBP3 F2R2L ESM1 VASN PDGFR TCM1 SOCS3 SPRY4 PLA2G2A CCL18 FOSL1 GPNMB IL6 DCN LTF SNA2 KNKN4 CAV1 SERPINE1 COL1A1 VEGFA FN1 SPP1 PLAT LIF LGLA3S IL10 EGFR ADM S100A9 CXCL8 CLCF1 S100A4 CASP                             |
| cell communication                | Regulation of signaling                                | 85            | 3952        | 1.10E-08 | LGLA1S HMOX1 SECTM1 GRPSC5 DKK1 CCL2 CCL20 IGFBP2 IGFBP5 SOCS2 GOS2 PLA2G5 ANXA1 IGFBP3 F2R2L ESM1 VASN PDGFR TCM1 SOCS3 SPRY4 PLA2G2A CCL18 FOSL1 GPNMB IL6 DCN LTF SNA2 KNKN4 CAV1 SERPINE1 COL1A1 VEGFA FN1 SPP1 PLAT LIF LGLA3S IL10 EGFR ADM S100A9 CXCL8 CLCF1 S100A4                                  |
| cell communication                | Regulation of signaling receptor activity              | 26            | 676         | 8.78E-07 | GRPSC5 SERPINE1 PLAUR TYMP TIMP1 HAMP DKK1 CCL2 MDK VEGFA CCL20 SPP1 LIF GPNMB IL6 IL10 SECTM1 ADM STC1 CXCL8 PDGFR CLCF1 PHLD2A TNFRSF12 TNFRF3 CCL18 FCGR2B                                                                                                                                                |
| metabolic process                 | Collagen metabolic process                             | 13            | 113         | 1.48E-08 | MMP2 MMP11 MMP9 MMP19 MMP14 FAP IL6 CTSK SERPINH1 COL1A2 VIM COL1A1 COL5A1                                                                                                                                                                                                                                   |
| metabolic process                 | Glycosaminoglycan catabolic process                    | 6             | 61          | 4.87E-04 | DCN SDC1 FMOD LUM HSPG2 BGN                                                                                                                                                                                                                                                                                  |
| metabolic process                 | Phosphorus metabolic process                           | 96            | 3597        | 1.64E-04 | NOS2 GRPSC5 CAV1 CCL2 VEGFA CCL20 SOCS2 PLA2G5 CNB1 CDK4 PKIB HK3 CDC68 PDGFR RRM2 FAM20C ANXA2 SOCS3 SPRY4 PLA2G2A APOC2 AC87632.1 CCL18 LGLA3S GPNMB LTF SPRX2 RARRES2 DKK1 FAM20A FN1 CDKN2C LIF PLVAP SPOCD1 IL6 EGFR IGFBP3 CLCF1 TYMS TCM1 CSAR1 ANG SLC11A1 PDLK                                      |
| metabolic process                 | Positive regulation of cellular metabolic process      | 72            | 3482        | 1.25E-06 | NOS2 TEAD2 HOXA2 MEK2 CCL2 VEGFA CCL20 PLA2G5 ANXA1 PDGFR ANXA2 PLA2G2A CASP4 APOC2 CCL18 CAV1 GPNMB DCN LTF RARRES2 DKK1 COL1A1 FAM20A SPP1 TWIST1 LIF CNB1 PAK3 IL6 IL10 EGFR RUNX1 S100A9 CLCF1 FOSL1 TIMP1 PLSCR1 CSAR1 ANG HOXB7 GRPSC5 SCL1A1 SNA2 HMOX1 CDCKE                                         |
| metabolic process                 | Regulation of prokaryotic metabolic process            | 53            | 1872        | 8.01E-09 | NOS2 GRPSC5 CAV1 CCL2 VEGFA CCL20 PLA2G5 CNB1 PKIB CDC68 PDGFR ANXA2 SERPINE1 RARRES2 APOC2 CCL18 LGLA3S GPNMB IL6 DCN LTF VEGFA FN1 LIF IGFBP5 RARRES2 DKK1 FAMD2A FN1 CDKN2C LIF SPOCD1 IL6 EGFR IGFBP3 CLCF1 TCM1 CSAR1 ANG SLC11A1 LOX SOCS2 KSK2 CH3L1 CDK4 ACE PBK CAVIN3 FAM20C SOCS3 PLAUR           |
| immune system process             | Leukocyte migration                                    | 28            | 491         | 1.06E-10 | CCL2 VEGFA CCL20 ANXA1 CXCL8 CCL18 FOSL1 S100A9 MMP9 MMP14 PDGFR CSAR1 SERPINE1 RARRES2 PLVAP HMOX1 CAV1 COL1A1 GRP1 FN1 SDC1 TREM2 IL10 SLC16A3 ITGA5 COL1A2 THBD                                                                                                                                           |
| immune system process             | Immune system process                                  | 95            | 3539        | 1.81E-15 | RARRES2 CCL2 VEGFA CCL20 PLA2G5 ANXA1 RUNX1 PTK3 CAMP CXCL8 CLCF1 TCM1 ANXA2 CSAR1 IGLL5 CCL18 DCN LTF FCGR2B KNKN4 CAV1 IGFBP2 GBP1 SLP1 LIF LGLA3S GPNMB IL10 SERPING1 S100A9 DPP4 HLA-DRA NOS2 SLC11A1 VIM LGLA1S HMOX1 MMP19 LOX BARX1 TOP2A C1RL SECTM1 LY96 MMP14 C                                    |
| immune system process             | Humoral immune response                                | 21            | 312         | 2.59E-09 | CAMP CXCL8 IGLL5 IL6 LTF SLP1 SERPING1 S100A9 C1R C1R2 SPON2 CFB RARRES2 FCGR2B SLC11A1 IL1R2 CCL2 PI3 TREM1 PLAUR CSX2 CSAR1                                                                                                                                                                                |
| regulation of proteolysis         | Peptide cross-linking                                  | 6             | 63          | 5.61E-04 | FN1 PI3 F13A1 ANXA1 DCN BGN                                                                                                                                                                                                                                                                                  |
| regulation of proteolysis         | Proteolysis                                            | 42            | 1988        | 3.41E-04 | TIMP1 PLAT CPVL SERPINE1 AEBP1 PLAUR C1RL CTSK SERPING1 SERPINH1 MMP14 C1R ANPEP ANXA2 SERPINA3 CASP4 SERPINA1 CAV1 ACE LTF FAP MMP2 MMP9 VEGFA IL10 S100A9 DPP4 CARD16 PLAUR MMP11 POCLE2 FN1 IL1R2 MMP19 PI3 PLS1 PTTG1 PBK CFB HP CNB1 CSAR1                                                              |
| regulation of proteolysis         | Regulation of peptidyl-tyrosine autophosphorylation    | 3             | 6           | 2.34E-04 | VEGFA CAV1 ACE                                                                                                                                                                                                                                                                                               |
| regulation of proteolysis         | Regulation of protein metabolic process                | 71            | 3006        | 1.10E-08 | GRPSC5 TIMP1 CAV1 SERPINE1 CCL2 VEGFA CCL20 PLA2G5 CNB1 PKIB SERPING1 SERPINH1 PDGFR ANXA2 SPRY4 PLA2G2A SERPINA3 CASP4 SERPINA1 CCL18 LGLA3S GPNMB LTF PLAT RARRES2 DKK1 FAM20A FN1 IGFBP5 CDKN2C LIF IL6 IL10 EGFR IGFBP3 ACE S100A9 PTK3 CLCF1 TYMS TCM1 CSAR1 CARD16 NC                                  |
| regulation of proteolysis         | Regulation of proteolysis                              | 27            | 863         | 1.49E-05 | TIMP1 SERPINE1 SERPING1 SERPINH1 ANXA2 SERPINA3 CASP4 SERPINA1 CAV1 PLAT LTF VEGFA IL10 S100A9 CARD16 PLAUR POCLE2 FN1 IL1R2 PI3 SLP1 MMP14 PTTG1 PBK MMP9 C1R CSAR1                                                                                                                                         |
| cell motility                     | Localization of cell                                   | 58            | 1670        | 4.51E-13 | TMSB10 PLAT CCL2 VEGFA CCL20 SDC1 ANXA1 TMSB15A CXCL8 PDGFR CD248 CCL18 IL6 DCN FAP SPRX2 SERPINE1 COL1A1 FN1 IGFBP5 PLAV LGLA3S GPNMB IGFBP3 MMP14 STC1 S100A9 DPP4 TNFRSF12A SNA2 TYMP ANXA1 HOXA2 MDK LOX TWIST1 FEZF1 POSTN EGFR ITGA5 PHLD2A CSAR1 HMOX1 MEK2 TIMP                                      |
| cell motility                     | Locomotion                                             | 64            | 1921        | 1.07E-13 | TMSB10 PLAT RARRES2 CCL2 VEGFA CCL20 SDC1 ANXA1 TMSB15A CXCL8 PDGFR CD248 CCL18 IL6 DCN FAP SPRX2 SERPINE1 COL1A1 FN1 IGFBP5 PLAV LGLA3S GPNMB IGFBP3 MMP14 STC1 S100A9 DPP4 TNFRSF12A SNA2 TYMP ANXA1 HOXA2 MDK LOX TWIST1 FEZF1 POSTN EGFR ITGA5 PHLD2A CSAR1 HMOX1 MEK2 TIMP                              |
| cell motility                     | Movement of cell or subcellular component              | 61            | 2139        | 2.55E-10 | TMSB10 PLAT CCL2 VEGFA CCL20 SDC1 ANXA1 TMSB15A CXCL8 PDGFR CD248 CCL18 IL6 DCN FAP SPRX2 SERPINE1 COL1A1 FN1 IGFBP5 PLAV LGLA3S GPNMB IGFBP3 MMP14 STC1 S100A9 DPP4 TNFRSF12A SNA2 TYMP ANXA1 HOXA2 MDK LOX TWIST1 FEZF1 POSTN EGFR ITGA5 PHLD2A CSAR1 HMOX1 MEK2 TIMP                                      |
| cell motility                     | Regulation of localization                             | 62            | 2905        | 3.89E-06 | TMSB10 MSR1 HAMP MEST VEGFA ANXA1 TMSB15A PDGFR ANXA2 CARD16 CAV1 DCN MMP1 SERPINE1 DKK1 CCL2 COL1A1 CCL20 FN1 IGFBP5 SPP1 PLAUR LIF LGLA3S HILPDA GPNMB IL6 IL10 EGFR IGFBP3 MMP14 STC1 ANG APOC2 SCL11A1 HMOX1 SPRX2 KNKN4 IL1R2 TWIST1 POSTN ITGA5 PTK3 FAMD2A C25A                                       |
| extracellular matrix organization | Cellular component disassembly                         | 18            | 573         | 6.32E-04 | NOS2 TOP2A FAP PDPN DPP4 SNA2 CAPG LAMC1 IL6 MMP2 MMP11 MMP5 TIMP1 CAV1 DKK1 MMP19 CNB1 MMP14                                                                                                                                                                                                                |
| extracellular matrix organization | Extracellular matrix organization                      | 40            | 392         | 1.02E-23 | MMP2 MMP11 MMP9 COL1A1 TGFBI MMP19 COL5A1 POSTN COL4A2 COL8A1 SERPINH1 MMP14 COL1A2 ANXA2 COL4A1 FAP AEBP1 PDPN DPP4 LOX FMOD LUM PTK3 EFM2P2 SDC1 LAMC1 IL6 DCN ICAM3 NID2 TIMP1 SERPINE1 FN1 MFA2P SPP1 LOXL1 COL6A2 HSPG2 CTSK ITGA5 BGN                                                                  |
| extracellular matrix organization | Extracellular structure organization                   | 44            | 460         | 8.4E-25  | MMP2 MMP11 MMP9 COL1A1 TGFBI MMP19 PLA2G5 COL5A1 POSTN COL4A2 COL8A1 SERPINH1 MMP14 COL1A2 ANXA2 COL4A1 APOC2 FAP AEBP1 PDPN DPP4 LOX FMOD LUM PTK3 EFM2P2 SDC1 LAMC1 IL6 DCN ICAM3 NID2 TIMP1 SERPINE1 FN1 MFA2P SPP1 LOXL1 COL6A2 HSPG2 CTSK ITGA5 BGN PLA2G2A                                             |
| extracellular matrix organization | Negative regulation of cellular component organization | 22            | 749         | 3.15E-04 | TMSB10 TMSB15A PTTG1 FAP DKK1 LGLA3S DPP4 COL5A1 VIM CAPG LGLA1S SPP1 TWIST1 LIF MMP14 MMP14 ACE CAV1 GBP1 TOP2A CNB1 FCGR2B                                                                                                                                                                                 |
| extracellular matrix organization | Regulation of cellular component organization          | 55            | 2653        | 3.84E-05 | TMSB10 CNB1 ANXA1 TMSB15A PTTG1 CDC68 ANXA2 APOC2 FAP SPRX2 CAV1 SERPINE1 AEBP1 DKK1 CCL2 VEGFA TWIST1 CDKN2C LIF LGLA3S EGFR MMP14 PDPN FOSL1 DPP4 TNFRSF12A SLC11A1 SNA2 VIM CAPG LGLA1S HAMP FN1 IGFBP5 SPP1 SOCS2 COL5A1 POSTN IL10 IGFBP3 ACE FBLIM1 PTK3 SHOX2 DCI                                     |
| lipid transport                   | Import into cell                                       | 24            | 887         | 4.85E-04 | RAB3A ANXA1 ANXA2 IGLL5 FOSL1 SERPINE1 DKK1 VEGFA LGLA3S EGFR ADM CXCL8 APOC2 SLC11A1 MSR1 ICAM3 POSTN PTK3 CD163 CCL2 HSPG2 FCGR2B                                                                                                                                                                          |
| lipid transport                   | Lipid localization                                     | 19            | 409         | 3.08E-06 | MSR1 MEST PLA2G5 ANXA1 STRA6 ANXA2 APOC2 NOS2 SPP1 HILPDA ACE APO4 AQP9 KNKN4 CAV1 SLC27A3 PLIN2 PLA2G2A IL6                                                                                                                                                                                                 |
| lipid transport                   | Lipid transport                                        | 16            | 367         | 4.29E-05 | PLA2G5 ANXA1 STRA6 ANXA2 APOC2 NOS2 SPP1 ACE MSR1 APO4 AQP9 KNKN4 SLC27A3 PLIN2 PLA2G2A CAV1                                                                                                                                                                                                                 |
| lipid transport                   | Monocarboxylic acid transport                          | 10            | 171         | 2.06E-04 | PLA2G5 ANXA1 STRA6 SLC16A3 NOS2 ACE AQP9 SLC27A3 PLIN2 PLA2G2A                                                                                                                                                                                                                                               |
| lipid transport                   | Regulated exocytosis                                   | 32            | 901         | 1.85E-07 | HMOX1 PLAUR LTF SLC11A1 FCGR2B LYZ MMP1 SERPINE1 RARRES2 VEGFA FN1 PLAUR ADGRE5 SLP1 F13A1 LGLA3S CH3L1 SERPING1 TAGLN HK3 S100A11 S100A9 PTK3 CAMP FABP5 ANPEP ANXA2 SERPINA3 SERPINA1 CSAR1 HP                                                                                                             |
| lipid transport                   | Vesicle-mediated transport                             | 49            | 2220        | 2.83E-05 | RAB3A ANXA1 ANXA2 IGLL5 FOSL1 SERPINE1 DKK1 VEGFA LGLA3S EGFR ADM CXCL8 APOC2 SLC11A1 MSR1 ICAM3 HMOX1 SPON2 PTK3 CD163 SDC1 CCL2 HSPG2 PLAUR LTF LY2 MMP9 TIMP1 RARRES2 FN1 PLAUR ADGRE5 SLP1 F13A1 CH3L1 SERPING1 TAGLN HK3 S100A11 S100A9 CAMP FABP5 ANPEP SERP                                           |
| cell proliferation                | Cell population proliferation                          | 63            | 2125        | 4.97E-11 | CAV1 VEGFA LIF CNB1 ANXA1 OSMR EGFR PDGFR CLCF1 ANXA2 ACE LTF SNA2 HMOX1 TIMP1 SOD2 FN1 IGFBP2 IGFBP5 CDKN2C HILPDA GPNMB IL6 IL10 IGFBP3 STC1 ESM1 CSAR1 DPP4 ANG NOS2 SLC11A1 FAP MMP2 TGFBI TWIST1 PLAV CSX2 FEZF1 CDK4 COL8A1 ADM MMP14 S100A11 FABP7 SHOX2 CD248 FOSL                                   |
| cell proliferation                | Positive regulation of cell population proliferation   | 33            | 1022        | 8.42E-07 | VEGFA LIF CNB1 ANXA1 OSMR EGFR PDGFR CLCF1 ANXA2 LTF HMOX1 TIMP1 FN1 IGFBP2 HILPDA IL6 ESM1 CSAR1 DPP4 ANG NOS2 TWIST1 CDK4 IL10 ADM SHOX2 CD248 IGFBP5 MMP9 CRIP1 TSPAN31 LAMC1 FOSL1                                                                                                                       |
| cell death                        | Cell death                                             | 54            | 2415        | 6.44E-06 | G                                                                                                                                                                                                                                                                                                            |

|                                      |                                      |    |      |          |                                                                                                                                                                                                                                                                                 |
|--------------------------------------|--------------------------------------|----|------|----------|---------------------------------------------------------------------------------------------------------------------------------------------------------------------------------------------------------------------------------------------------------------------------------|
| coagulation                          | Coagulation                          | 18 | 364  | 2.68E-06 | CLIC1 PLAU ANXA2 FAP SERPINE1 F13A1 PDPN SERPING1 F2RL2 THBD SERPINA1 CAV1 PLAUR PLSCR1 PLAT COL1A1 IL6 COL1A2                                                                                                                                                                  |
| growth                               | Growth                               | 31 | 1028 | 7.29E-06 | ANXA1 COL6A2 ANXA2 CDKN2C EGFR MMP14 STC1 CAMP TNFRSF12A HAMP FN1 IGFBP2 IGFBP5 SPP1 SOCS2 POSTN CCNB1 CDK4 IL10 EMP3 IGFBP3 ADM HOXB13 EN1 PTX3 TYMS PHLDA2 SOCS3 STRA6 VEGFA S100A9                                                                                           |
| multi-multicellular organism process | Multi-multicellular organism process | 12 | 239  | 1.53E-04 | MMP2 MMP9 IGFBP2 IGFBP5 LIF ADM STC1 ITGA5 FOSL1 THBD TIMP1 SPP1                                                                                                                                                                                                                |
| multi-organism process               | Multi-organism process               | 68 | 2827 | 1.35E-08 | NOS2 SLC11A1 LY2 HAMP CAMP CXCL8 ANXA2 IGLL5 LTF LGALS1 CAV1 CCL2 FN1 SLP1 IL6 IL10 LY96 S100A9 PTX3 ISG20 CARD16 DCN VIM SPAG4 FCGR2B MMP2 MMP9 FAM20A MDK CCL20 IGFBP2 IGFBP5 GBP1 NCAPH MMP19 PI3 LIF HOXD10 LOXL1 TOP2A CCNB1 CDK4 KRT7 EGFR ADM STC1 ACE SPON2 ITGA5 EN1 C |
| regulation of biological quality     | Regulation of biological quality     | 76 | 4319 | 1.36E-04 | LTF LY2 CLIC1 NOS2 SLC11A1 TMSB10 MSR1 SPAG4 MOXD1 HMOX1 HAMP CAV1 MEST SPP1 PLAU ANXA1 TMSB15A ACE TFF3 HK3 F2RL2 CD52 ANXA2 PLSCR1 CSAR1 FAP SERPINE1 APOC2 SRPX2 KCNN4 CCL2 VEGFA F13A1 LIF HILPDA IL6 ADM STC1 PDPN TNFRSF12A CAPG LGALS1 DKK1 LOX FN1 IGFBP5 SOCS2 G0S     |
| regulation of body fluid levels      | Regulation of body fluid levels      | 76 | 4319 | 1.36E-04 | LTF LY2 CLIC1 NOS2 SLC11A1 TMSB10 MSR1 SPAG4 MOXD1 HMOX1 HAMP CAV1 MEST SPP1 PLAU ANXA1 TMSB15A ACE TFF3 HK3 F2RL2 CD52 ANXA2 PLSCR1 CSAR1 FAP SERPINE1 APOC2 SRPX2 KCNN4 CCL2 VEGFA F13A1 LIF HILPDA IL6 ADM STC1 PDPN TNFRSF12A CAPG LGALS1 DKK1 LOX FN1 IGFBP5 SOCS2 G0S     |
| regulation of molecular function     | Regulation of molecular function     | 22 | 504  | 2.68E-06 | CLIC1 PLAU ANXA2 FAP SERPINE1 F13A1 ADM PDPN KCNN4 CAV1 SOCS2 SERPING1 F2RL2 THBD SERPINA1 VEGFA PLAUR PLSCR1 PLAT COL1A1 IL6 COL1A2                                                                                                                                            |
| regulation of receptor binding       | Regulation of receptor binding       | 79 | 3529 | 1.00E-08 | NOS2 GPRC5A TIMP1 CAV1 SERPINE1 CCL2 CCL20 PLAZG5 CCNB1 ANXA1 PKIB SERPING1 SERPINH1 CCDC8 PDGFR ANXA2 SPRY4 SERPINA3 CASP4 SERPINA1 APOC2 CCL18 LGALS3 PLAUR LTF MMP9 DKK1 VEGFA PLAU CDKN2C SLP1 SPOCD1 IL6 IL10 EGFR S100A9 PTX3 TCIM PLSCR1 CARD16 HP SLC11A1 TYMP HMM      |
| reproduction                         | Reproduction                         | 5  | 24   | 6.11E-05 | ANXA2 MMP9 LOX PHLDA2 IL10                                                                                                                                                                                                                                                      |
|                                      |                                      | 40 | 1513 | 4.65E-06 | MND1 TOP2A ANXA1 PTTG1 DCN SPAG4 MMP2 MMP9 MDK IGFBP2 IGFBP5 SDC1 NCAPH MMP19 KKS2 PI3 LIF HOXD10 CCNB1 IL10 EGFR ADM MMP14 STC1 HOXB13 ACE ITGA5 PTX3 FOSL1 THBD PHLDA2 SOCS3 RPL39L CRIP1 TIMP1 STRA6 VEGFA ANG RAD54L SPP1                                                   |

FDR: False Discovery Rate.

**Table S9.** Functional annotation of genes associated with glioblastoma patients' overall survival based on KEGG pathways.

| KEGG.pathway                                         | genes.in.list | total.genes | FDR      | genes                                                                                  |
|------------------------------------------------------|---------------|-------------|----------|----------------------------------------------------------------------------------------|
| Proteoglycans in cancer                              | 15            | 198         | 2.22E-07 | DCN EGFR FN1 HOXD10 HSPG2 ITGA5 LUM MMP2 MMP9 PLAU PLAU SDC1 TWIST1 VEGFA CAV1         |
| PI3K-Akt signaling pathway                           | 15            | 353         | 1.10E-04 | CDK4 COL1A1 COL1A2 COL4A1 COL4A2 COL6A2 EGFR FN1 IL6 ITGA5 LAMC1 SPP1 VEGFA PDGFD OSMR |
| Pathways in cancer                                   | 15            | 528         | 4.42E-03 | CDK4 KKS2 COL4A1 COL4A2 EGFR FN1 HMOX1 IL6 CXCL8 LAMC1 MMP2 MMP9 NOS2 VEGFA RUNX1      |
| Focal adhesion                                       | 13            | 199         | 8.58E-06 | COL1A1 COL1A2 COL4A1 COL4A2 COL6A2 EGFR FN1 ITGA5 LAMC1 SPP1 VEGFA PDGFD CAV1          |
| Complement and coagulation cascades                  | 11            | 78          | 6.94E-08 | F2RL2 F13A1 SERPINE1 PLAT PLAU PLAU CFB THBD SERPING1 C1R C5AR1                        |
| ECM-receptor interaction                             | 11            | 82          | 8.01E-08 | COL1A1 COL1A2 COL4A1 COL4A2 COL6A2 FN1 HSPG2 ITGA5 LAMC1 SDC1 SPP1                     |
| Transcriptional misregulation in cancer              | 10            | 186         | 4.14E-04 | CDKN2C IGFBP3 IL6 CXCL8 MMP9 PAX3 PLAT PLAU IL1R2 RUNX1                                |
| Cytokine-cytokine receptor interaction               | 10            | 293         | 7.86E-03 | CLCF1 IL6 CXCL8 IL10 LIF TNFRSF12A CCL2 CCL20 IL1R2 OSMR                               |
| HIF-1 signaling pathway                              | 9             | 100         | 3.37E-05 | EGFR HK3 HMOX1 IL6 LDHA NOS2 SERPINE1 TIMP1 VEGFA                                      |
| Relaxin signaling pathway                            | 9             | 129         | 1.37E-04 | COL1A1 COL1A2 COL4A1 COL4A2 EGFR MMP2 MMP9 NOS2 VEGFA                                  |
| Phagosome                                            | 8             | 150         | 1.63E-03 | FCGR2B FCGR3A HLA-DRA ITGA5 MSR1 C1R TUBB6 TUBA1C                                      |
| MicroRNAs in cancer                                  | 8             | 150         | 1.63E-03 | EGFR HMOX1 HOXD10 ITGA5 MMP9 PLAU VEGFA VIM                                            |
| IL-17 signaling pathway                              | 7             | 92          | 5.59E-04 | IL6 CXCL8 MMP9 S100A9 CCL2 CCL20 FOSL1                                                 |
| TNF signaling pathway                                | 7             | 110         | 1.47E-03 | IL6 LIF MMP9 MMP14 CCL2 CCL20 SOCS3                                                    |
| P53 signaling pathway                                | 5             | 72          | 5.90E-03 | CDK4 IGFBP3 SERPINE1 RRM2 CCNB1                                                        |
| AGE-RAGE signaling pathway in diabetic complications | 13            | 100         | 1.17E-08 | CDK4 COL1A1 COL1A2 COL4A1 COL4A2 FN1 IL6 CXCL8 MMP2 SERPINE1 CCL2 THBD VEGFA           |
| Human papillomavirus infection                       | 12            | 330         | 1.93E-03 | CDK4 COL1A1 COL1A2 COL4A1 COL4A2 COL6A2 EGFR FN1 ITGA5 LAMC1 SPP1 VEGFA                |
| Amoebiasis                                           | 11            | 96          | 2.64E-07 | COL1A1 COL1A2 COL4A1 COL4A2 FN1 IL6 CXCL8 IL10 LAMC1 NOS2 IL1R2                        |
| Fluid shear stress and atherosclerosis               | 10            | 138         | 5.08E-05 | HMOX1 MMP2 MMP9 PLAT CCL2 SDC1 THBD VEGFA IL1R2 CAV1                                   |
| Pertussis                                            | 8             | 76          | 3.41E-05 | LY96 IL6 CXCL8 IL10 ITGA5 NOS2 SERPING1 C1R                                            |
| Protein digestion and absorption                     | 8             | 90          | 8.18E-05 | COL1A1 COL1A2 COL4A1 COL4A2 COL5A1 COL6A2 DPP4 KCNN4                                   |
| Tuberculosis                                         | 8             | 177         | 4.33E-03 | FCGR2B FCGR3A HLA-DRA IL6 IL10 LSP1 NOS2 CAMP                                          |
| Staphylococcus aureus infection                      | 7             | 64          | 8.18E-05 | FCGR2B FCGR3A HLA-DRA IL10 CFB C1R C5AR1                                               |
| Rheumatoid arthritis                                 | 7             | 89          | 5.09E-04 | CTSK HLA-DRA IL6 CXCL8 CCL2 CCL20 VEGFA                                                |
| Small cell lung cancer                               | 7             | 92          | 5.59E-04 | CDK4 KKS2 COL4A1 COL4A2 FN1 LAMC1 NOS2                                                 |
| Chagas disease (American trypanosomiasis)            | 7             | 102         | 1.02E-03 | ACE IL6 CXCL8 IL10 NOS2 SERPINE1 CCL2                                                  |
| Bladder cancer                                       | 6             | 41          | 7.67E-05 | TYMP EGFR CXCL8 MMP2 MMP9 VEGFA                                                        |
| Prostate cancer                                      | 6             | 97          | 4.01E-03 | EGFR MMP9 PLAT PLAU IL1R2 PDGFD                                                        |
| Malaria                                              | 5             | 48          | 1.25E-03 | IL6 CXCL8 IL10 CCL2 SDC1                                                               |

FDR: False Discovery Rate.

**Table S10.** List of cancer genes associated with glioblastoma patients' overall survival according to COSMIC database.

| <b>gene.symbol</b> | <b>somatic.tumour.types</b> | <b>germline.tumour.types</b> | <b>role.in.cancer</b> |
|--------------------|-----------------------------|------------------------------|-----------------------|
| CDK4               | ----                        | melanoma                     | oncogene              |
| CDKN2C             | glioma, MM                  | ----                         | TSG                   |
| COL1A1             | DFSP, aneurysmal bone cyst  | ----                         | fusion                |
| EGFR               | glioma, NSCLC               | NSCLC                        | oncogene              |
| FCGR2B             | ALL                         | ----                         | oncogene, fusion      |
| FKBP9              | glioma                      | ----                         | potential role        |
| HOXC13             | AML                         | ----                         | oncogene, fusion      |
| HOXD11             | AML                         | ----                         | oncogene, fusion      |
| PAX3               | alveolar rhabdomyosarcoma   | ----                         | oncogene, fusion      |
| RUNX1              | AML, pre B-ALL, T-ALL       | ----                         | oncogene, TSG, fusion |

TSG: Tumor Suppressor Gene.





|                  |   |   |   |   |   |  |   |   |
|------------------|---|---|---|---|---|--|---|---|
| <i>SPP1</i>      |   |   |   | X |   |  |   |   |
| <i>SPTBN1</i>    |   |   |   |   |   |  |   | X |
| <i>ST14</i>      | X |   |   |   |   |  |   |   |
| <i>STC1</i>      |   |   |   |   | X |  |   |   |
| <i>TACR1</i>     |   | X |   |   |   |  |   |   |
| <i>TAGLN</i>     |   |   |   |   | X |  |   |   |
| <i>TAGLN2</i>    |   |   |   |   | X |  |   |   |
| <i>TFF3</i>      |   |   |   | X |   |  |   |   |
| <i>TFPI</i>      |   | X |   |   |   |  |   |   |
| <i>TIMP1</i>     |   |   | X |   |   |  |   |   |
| <i>TNFRSF12A</i> |   |   |   |   | X |  |   |   |
| <i>TNIK</i>      |   | X |   |   |   |  |   |   |
| <i>TOP2A</i>     |   |   | X |   | X |  | X | X |
| <i>TREM1</i>     |   |   |   |   | X |  |   |   |
| <i>TWIST1</i>    |   |   |   |   | X |  |   |   |
| <i>TYMP</i>      |   |   |   |   | X |  |   |   |
| <i>TYMS</i>      |   |   | X |   | X |  |   |   |
| <i>VEGFA</i>     |   |   | X |   | X |  |   |   |
| <i>WISP1</i>     |   |   |   |   | X |  |   |   |
| <i>YAP1</i>      |   |   | X |   |   |  |   |   |

\*X\* means the Reboot official gene symbol is present in the corresponding analysis. For transcripts, Ensembl transcripts IDs were converted to equivalent Ensembl genes IDs. For the TTD database analysis, all 4 categories in the website were considered: (i) success; (ii) patent; (iii) clinical trials; and (iv) research.

**Table S12.** Transcripts associated with pancreas adenocarcinoma patients' overall survival in Reboot.

| <b>transcript.symbol</b> | <b>regression.coefficient</b> |
|--------------------------|-------------------------------|
| ADAP1-209                | 0.0243389                     |
| ADAP1-211                | 0.0089557                     |
| ADAP1-218                | 0.0085884                     |
| ALMS1-202                | -0.0300002                    |
| BAIAP2L2-203             | 0.0140901                     |
| BBS1-206                 | -0.0359856                    |
| BCLAF1-204               | 0.0087351                     |
| BCLAF1-205               | 0.0184988                     |
| BID-209                  | 0.0099699                     |
| BTN3A3-201               | 0.0125401                     |
| CARD6-201                | 0.0092825                     |
| CENPF-201                | 0.0819655                     |
| CENPF-206                | 0.0248675                     |
| CNOT1-204                | -0.0044733                    |
| CTTN-210                 | -0.0000180                    |
| CXCL12-201               | 0.0004189                     |
| DNAJA4-203               | 0.0238143                     |
| ERAP2-202                | 0.0273279                     |
| EXOC7-201                | -0.0129483                    |
| FAM111B-201              | 0.0329235                     |
| FCGR2A-201               | 0.0042429                     |
| FES-201                  | -0.0069084                    |
| FOPNL-201                | 0.0123006                     |
| GBGT1-203                | -0.0008816                    |
| GNAI2-201                | 0.0004880                     |
| GNAI2-202                | -0.0013797                    |
| GTF3C2-201               | 0.0156593                     |
| HTT-202                  | -0.0395587                    |
| IFI44-201                | 0.0060896                     |
| IFI44-203                | 0.0015845                     |
| LGALS8-203               | 0.0057068                     |
| LUC7L2-201               | 0.0077005                     |
| LUC7L2-202               | -0.0014209                    |
| LUC7L2-203               | -0.0212371                    |
| MALAT1-215               | 0.0000048                     |
| MAMDC4-204               | -0.0135653                    |
| MCF2L-201                | -0.1363477                    |
| MLKL-202                 | 0.0371815                     |
| NAPRT-201                | -0.0015641                    |
| NAPRT-203                | -0.0019722                    |
| NOP53-201                | -0.0027888                    |
| NRDC-201                 | 0.0188089                     |

|              |            |
|--------------|------------|
| NTM-202      | -0.0001470 |
| NTM-206      | 0.0058694  |
| NUP54-201    | 0.0383425  |
| PDE4DIP-214  | 0.0201281  |
| PLAGL1-204   | -0.0132881 |
| PRSS3-202    | 0.0060979  |
| RAB3GAP1-203 | 0.0141703  |
| RB1-201      | 0.0078102  |
| RBM23-204    | -0.0001823 |
| RBP5-201     | -0.0221852 |
| SLFN13-205   | 0.0235015  |
| SNU13-202    | 0.0015843  |
| SPTBN1-202   | 0.0052771  |
| SPTBN1-204   | -0.0015206 |
| SRRM2-217    | -0.0048007 |
| TFDP1-207    | -0.0379698 |
| TPRA1-202    | -0.0000431 |
| TSC22D1-201  | 0.0012577  |
| VCL-201      | 0.0138090  |
| WRB-202      | 0.0095050  |

---

Highlighted are isoforms present in final PAAD 7-tr
